# Supplementary material for: Novel Observations From Next-Generation RNA Sequencing of Highly Purified Human Adult and Fetal Islet Cell Subsets
Source: Oxford University Press journal article supplement (doi:10.2337/db15-0039), 2015-04-30
Supplement: db150039supplementarydata2.xlsx [file db150039supplementarydata2.xlsx]

## Sheet: supplemental.table.2.tpm.txt
Supplemental Table 1: Gene expression values for each transcript. The table provides the gene expression value in transcripts per million (TPM). The sample numbers correspond to the heat map sample ID number provided in Supplemental Table 1.
GeneName	Fetal_Beta1	Fetal_Beta2	Fetal_Beta3	Fetal_Beta4	Fetal_Beta5	Fetal_Beta6	Fetal_Alpha1	Fetal_Alpha2	Fetal_Alpha3	Fetal_Alpha4	Fetal_Alpha5	Adult Alpha 1	Adult Alpha 3	Adult Alpha 4	Adult Alpha 5	Adult Alpha 6	Adult Alpha 7	Adult Beta 1	Adult Beta 2	Adult Beta 3	Adult Beta 4	Adult Beta 5	Adult Beta 6	Adult Beta 7
6M1-18	0	0	0	0	0	0	0	0	0	0	0	0	0	0	0	0	0	0	0	0	0	0	0	0
A1BG	2.71	2.25	3.21	1.7	2.26	0.16	8.62	12.77	13.31	10.25	6.54	5.48	5.16	4.63	9.7	6.84	7.61	2.39	4.97	9.47	8.97	9.93	10.32	8.04
A1BG-AS1	12.05	7.89	2.91	0.83	3.82	3.41	0.27	3.76	1.32	7.91	9.68	25.49	15.38	28.57	19.59	9.03	16.35	16.36	20.6	7.94	23.42	14.47	14.72	29.25
A1CF	13.66	22.98	18.17	15.02	9.5	18.12	41.67	57.27	63.25	82.26	62.6	37.68	73.44	38.01	80.21	59.55	58.27	8.9	14.77	20.21	13.76	20.65	32.92	23.41
A2M	0.28	1.7	9.02	6.39	6.91	0.2	23.44	2.48	34.02	1.91	8.1	0.63	7.77	0.95	0.66	0.11	1.03	1.41	0.13	1.37	6.42	0.11	0.45	0.43
A2M-AS1	2.52	0.48	1.16	0.58	9.89	0.38	2.08	4.05	0	2.78	4.25	1.36	1.59	1.23	0.85	4.49	1.58	0.45	2.18	2.43	3.74	1.77	1.57	3.61
A2ML1	0.56	1.52	2.1	1.37	2.71	0.39	0	0	0	0.14	0	0.49	0.36	0	0	0	0	0	0	0	0	0.14	0	0
A2MP1	0	0	0	0.26	0	0	0	0	0	0	0	0	0	0.75	0	0	0	0.28	0	0	0	0	0	0.84
A4GALT	21.62	33.51	39.69	48.15	55.7	17.14	10.18	0	0	0.88	1.57	1.14	0.42	0.92	0.48	0	0.16	0	0	0	0	0	0	0
A4GNT	0	0	0	0	0	0	0	0	0	0	0	0.67	0.25	0.51	0	0.21	0.36	0.19	1.35	0	1.39	1.1	0.98	0.56
AA06	0	0.56	1.39	0	0.95	0	0	0	0	0	4.17	0	0	0	0	0	0	0	0	0	0	0	0	0
AAAS	15.89	20.94	35.6	21.79	10.96	55.28	27.9	9.45	21.04	27.84	19.27	30.81	27.65	25.38	40.26	24.84	33.11	25.02	24.05	30.98	42.8	33.08	39.52	69.96
AACS	17.68	15.99	13.72	14.96	13.5	24.67	16.51	29.34	55.46	32.6	47.26	34.26	34.85	33.57	44.33	29.4	34.76	41.29	36.46	49.27	135.52	52.79	60.44	77.45
AACSP1	0	0	0.08	0	0.09	0	0	0	0	0	0	1.09	0	2.06	0.71	0.84	0.14	0	0.27	0	0	0.45	0	0.23
AADAC	0	0	0.21	0	0.36	0	0.68	0.67	0	0	0	0.74	0.55	0	0	0	0	0.21	0.75	1.19	0.51	0	0	0
AADACL2	0	0	0.53	0	0	0	0	0	0	0	0	0	0	0.71	0	0	0	0	0	0	0	0	0	0
AADACL3	0	0	0	0	0	0	0	0	0	0	0	0.46	0	0	0	0.28	0.16	0	0	0.1	0	0	0	0
AADACL4	0	0	0	0	0	0	0	0	0	0	0	0.38	0	0	0	0	0	0	0	0	0	0	0	0
AADAT	16.01	20.21	25.77	13.85	12.18	25.73	27.38	27.74	89.25	21.73	39.67	5.07	20.08	8.49	11.69	8.8	12.06	4.72	6.78	15.68	7.77	17.01	20.43	11.49
AAED1	9.11	5.73	10.17	4.54	0.95	12.68	46.11	38.11	20.35	28.61	32.8	9.83	45.7	7.39	23.16	29.3	27.43	8.49	7.88	22.11	14.31	20.93	20.02	15.2
AAK1	19.59	17.04	26.46	24.49	49.82	36	43.29	30.54	62.07	40.81	28.95	67.25	54.59	66.67	53.54	50.28	37.16	27.76	30	20.99	53.02	60.78	55.89	62.79
AAMDC	15.68	9.47	37.85	15.68	7.65	8.09	57.9	23.15	6.55	74.73	35.72	5	28.42	3.78	46.73	19.5	21.75	4.02	2.27	8.81	19.46	20.84	27.66	22.07
AAMP	12.33	22.18	27.35	13.86	10.91	25.03	60.85	35.68	24.74	31	26.66	20.94	16.86	43.52	46.47	27.91	29.9	21.88	17.65	20	39.93	40.7	27.93	35.45
AANAT	0	0	0.96	0	0	0	0	0	0	0.77	0.82	0	0.69	1.35	0.71	0.57	0	0	0.59	0	0	0	0.18	0
AARD	1.66	0.59	3.03	4.41	0.39	0.42	0.24	1.86	0.29	2.62	2.31	0.33	0.25	0.5	0	2.05	1.06	0.19	0.67	0.21	1.38	0.54	0.19	0.83
AARS	15.58	26.96	27.15	17.25	36.51	54.56	52.34	38.55	43.92	61.33	49.24	72.03	51.43	111.14	173.73	77.18	83.25	73.43	73.24	61.38	138.62	315.74	293.02	457.36
AARS2	4.86	4.47	7.83	7.61	6.36	5.74	1.16	2.4	1.92	3.87	3.21	5.96	4.23	7.69	4.15	3.23	3.75	2.87	6.29	3.5	8.61	4.99	5.9	8.26
AASDH	6.89	3.67	6.95	3.33	2.2	5.33	11.62	15.72	10.08	17.77	15.59	8.54	4.9	9.47	4.42	1.97	6.73	5.57	11.07	8.6	32.2	11.79	8.69	10.3
AASDHPPT	23.78	11.91	22.26	18.23	31.15	16.45	25.93	38.77	21.93	28.07	33.23	11.28	19.29	15.84	16.43	16.79	18.55	5.3	9.97	19.17	25.58	20.86	24.53	34.48
AASS	4.06	7.34	10.78	3.85	2.47	5.58	1.71	5.14	19.96	6.2	6.49	5.13	4.03	1.99	1.37	3.09	1.77	4.29	10.36	14.5	17.88	10.48	8.09	11.07
AATF	9.24	18.78	17.47	21.9	17.77	15.8	8.58	12.79	25.93	28.1	23.35	16.65	39.52	30.92	46.41	33.96	30.19	11.15	10.01	18.62	58.14	57.44	56.3	76.41
AATK	2.08	13.2	3.76	1.6	0.34	2.62	8.44	5.81	1.89	9.66	10.46	20.06	8.33	20.58	10.93	6.6	3.13	12.62	13.76	4.19	6.23	3.53	2.31	4.66
AATK-AS1	0	1.51	0	0.21	0	0	0	0	0	0	0	1.52	0	0.57	0	0	0	0	0.4	0	0	0	0	0
AB000466	0	0.26	5.38	2.3	0	0	3.02	0.38	1.86	1.06	0.07	7.12	3.46	11.7	3.54	0.64	2.94	1.96	4.35	2.29	3.72	4.11	1.29	6.34
AB007962	1.11	4.02	0.54	1.58	0.62	0.4	0.29	1.25	1.63	0.84	1.88	2.09	1.95	1.63	0.25	0.78	0.85	1.19	1.22	0.96	2.68	1.05	0.79	0.87
AB062081	48.22	106.8	96.61	103.64	109.94	54.25	0	2.53	1.45	1.35	3.06	1.58	3.62	0	3.38	3.96	2.6	2.63	1.58	3.12	2.25	3.93	2.81	1.35
AB062083	868.74	1388.6	1459.29	1360.87	2045.05	1212.92	11.76	11.57	0	51.31	0	59.61	65.8	35.36	46.3	18.56	13.08	11.84	30.34	29.67	15.52	43.12	38.47	11.8
AB073649	0.48	0.77	7.03	3.91	7.99	2.89	8.64	5.75	7.44	13.9	19.74	24.86	23.41	12.94	11.34	6.48	7.85	6	7.77	6.49	13.37	5.16	10.48	8.28
AB074160	0.06	0	0.04	0	0	0	1.77	0.73	5.55	1.55	4.1	0.54	1.89	1.64	1.13	1.6	0.59	0	0	0	0	0	0	0.11
AB074162	5.36	1.21	11.48	8.21	11.76	1.97	6.37	7.17	9.95	28.34	44.2	1.59	1.36	11.58	0	1.46	1.26	0.61	2.92	0.17	4.38	1.08	0.15	0.66
AB074166	0.67	1.79	0	1.97	0.59	2.35	4.02	4.35	5.59	9.46	14.08	7.42	8.47	8.62	6.65	2.83	5.91	5.14	11.65	12.69	17.14	6.41	4.69	7.88
AB074188	9.79	7.75	9.26	1.2	11.97	5.74	80.58	57.53	68.19	76.59	70.11	15.33	37.09	21.79	15.53	14.94	11.99	6.65	11.66	17.96	27.39	11.57	14.48	14.64
AB075489	2.35	0.34	3.01	3.9	2.89	0.94	1.13	2.92	1.98	3.96	3.13	6.41	14.11	14.16	9.6	6.59	7.71	2.38	5.26	5.14	15.75	4.59	6.29	11.97
AB075492	4.23	4.74	4.9	4.3	7.06	2.03	0	0.39	0	0.7	2.42	0.45	0.66	1.77	1.05	0	1.19	0.25	1.95	0.29	2.9	0.61	0.65	2.24
AB209061	3.21	16.23	19.25	11.94	17.56	11.08	4.09	3.65	9.25	6.81	5.42	10.67	3.53	29.04	1.31	1.68	2.23	10.88	11.68	1.57	12.56	4.08	2.7	6.81
AB209185	0.24	0.28	11.26	2.65	0.68	2.07	6.58	5.39	20.43	6.65	6.88	2.8	5.95	5.16	7.53	2.48	5.76	3.3	7.17	3.85	10.31	13.23	10.9	14.12
AB209315	4.47	0	18.65	27.96	13.13	11.2	0.82	5.67	15.66	0.63	0.89	0	1.75	0	0	0	1.63	0	2.25	2.18	0	1.09	0	0.48
AB231703	0	0	0	0	0	0	0	0	0	0	0	0	0	0	0	0	0	0	0	0	0	0	0	0
AB231705	0	0	0	0	0	0	0	0	0	0	0	0	0	0	0	0	0	0	0	0	0	0	0	0
AB231710	0	0	0	0	0	0	3.58	0	0	0	0	0	0	0	0	0	0	0	0	0	0	0	0	0
AB231721	0	0	0	0	2.21	0	0	0	0	0	0	0	0	0	0	0	0	0	0	0	0	0	0	0
AB231729	0.96	0.44	0	0.82	0	0	0	0	0	0	0	0	0	0	0	0	0	0	0	0	0	0	0	0
AB231731	0	0	0	0	0	0	0	0	0	0	0	0	0	0	0	0	0	0	0	0	0	0	0	0
AB231739	0	0	0	0	0	0	0	0	0	0	0	0	0	3.42	0	0	0	0	0	0	0	0	0	0
AB231779	0	0	0	0	0.22	0	0	0	0	0	0	0	0	0	0	0	0	0	0	0	0	0	0	0
AB240015	2.26	0.6	4.49	0	1.7	0.84	0	0	0	0	0	0	0.79	0	0	0	0	0.59	1.06	0	2.97	0.88	0	0
AB429224	1.24	26.42	2.22	1.24	1.01	1.67	1.34	3.66	2.76	4.32	2.91	2.09	1.54	0.78	5.2	10.28	0.56	0	0	0.67	0	1.71	0	0
AB488780	1.57	10.2	13.83	8.49	22.6	7.72	21.76	24.64	1.78	17.64	13.98	7.9	4.49	9.13	13.73	6.81	14.92	1.68	12.25	1.3	21.13	6.67	10.61	17.53
AB586698	0	0	1.1	0	0	0	0	0	0	0	7.34	2.45	0	3.63	4.03	1.57	0	2.72	2.45	5.07	0	0	1.53	0
ABAT	81.12	82.61	87.16	55.77	43.21	115.9	85.33	83.38	111.42	101.98	119.3	20.57	43.69	32.6	18.46	10.61	17.41	23.76	37.88	109.64	63.14	24.13	18.05	26.53
ABCA1	6.14	2.21	12.84	13	10.95	0.63	5.34	4.96	25.62	3.78	8.49	26.42	26.88	20.03	9.38	10.14	5.4	14.02	8.6	9.99	15.47	9.45	16.06	7.99
ABCA10	2.44	1.7	3.15	1.05	2.35	0.9	1.52	1.39	6.14	4.15	3.92	6	9.97	3.98	1.57	3.13	4.75	4.49	12.73	7.27	6.58	7.98	3.96	4.52
ABCA11P	10.21	11.72	10.81	6.55	5.71	8.59	14.29	10.86	10.7	22.56	17.62	9.91	17.8	13.01	11.47	6.5	6.32	6.42	7.87	12.61	14.84	9.21	8.57	15.27
ABCA12	0	0	0.02	0.06	0	0	0	0	0	0	0.4	0.13	0	0.22	0	0	0	0	0	0	0	0	0	0
ABCA13	28.65	28.98	15.49	49.16	51.53	6.79	0.2	0	0	0	0	0.18	0	0.12	0	0.11	0.07	0.33	0.26	0	3.05	0	0.76	0.23
ABCA17P	0	0	0	0	0	0	0.5	0	0	0.14	0	0.42	0.1	0	1.78	1.09	0.18	0.38	1.51	0.44	1.24	1.78	0.28	3.01
ABCA2	40.34	60.99	31.23	35.25	57.39	75.17	44.58	17.75	81.45	24.9	33.97	66.39	27.7	87.67	21.53	13.51	17.22	80.9	64.57	20.33	52.83	18.09	23.28	30.58
ABCA3	34.53	21.8	67.17	13.27	54.09	41.54	16.11	31.21	41.99	26.51	23.67	34.85	28.92	31.22	25.91	23.67	24.04	60.19	68.34	57.35	111.44	52.94	54.87	102.52
ABCA4	0.25	0	0.05	0.1	0	0	0	0	0	0.2	0.77	0.24	0.57	0.48	0.29	0.67	0.2	0	0.61	0	0	0	0.3	0.87
ABCA5	12.14	11.92	20.61	14.87	16.59	13.3	16.24	25.32	18.96	38.01	32.45	41.83	29.74	26.31	26.48	24.95	28.65	30.23	49.91	43.82	100.65	45.82	44.01	47.47
ABCA6	0.13	0.44	6.62	0.29	1.64	0.14	2.92	1.08	7.38	3.35	10.75	1.11	5.54	2.48	1.24	3.26	0.93	4.11	7.84	7.88	9	5.42	3.21	5.78
ABCA7	10.14	18.57	15.39	17.03	37.49	11.78	10.39	5.03	11.29	18.04	16.57	14.34	5.06	24.45	17.81	9.24	10.02	22.29	33.83	10	40.99	11.62	9.13	27.16
ABCA8	28.63	47.21	73.02	31.75	26.19	42.36	1.92	0.59	14.2	0.25	4.51	0.73	1.38	0.46	0.32	0.24	0	0.45	0	0.45	1.11	0	0	0.34
ABCA9	2.31	3.29	7.32	3.2	5.24	2.65	0.39	0.87	14.66	1.44	2.58	4.52	4.02	0.88	0.31	0.66	0.31	3.55	9.79	3.54	6.93	3.06	2.88	2.32
ABCB1	2.29	6.51	1.42	1.12	2.91	0.5	0.16	0.34	0.63	1.97	1.2	27.58	86.13	21.34	36.17	35.33	19.58	3.91	8.34	18.5	28.27	10.32	19.18	18.15
ABCB10	4.4	3.61	7.24	10.29	6.64	2.28	15.84	7.48	3.72	14.73	23.3	6.11	17.45	9.44	15.01	11.29	22.11	1.19	2.45	6.43	7.35	9.06	14.58	9.13
ABCB11	0	0	0	0	0	0	0	0	0	0	0	1.1	0	0.83	0	0	0	0.1	1.28	0.58	1.51	0.15	0.11	0.15
ABCB4	0.07	0.44	0.36	0.08	0.1	0	1.02	0.2	0	0.82	0.42	7.3	2.22	1.99	3.66	1.53	1.54	0.52	1.71	1.67	2.33	0.5	0.97	1.29
ABCB5	8.26	11.13	12.93	8.95	8.49	6.74	0	0	0	0	0	0	0.28	0.16	0	0	0.07	0	0	0	0	0.24	0	0
ABCB6	10.27	6	12.8	6.32	8.63	11.78	6.46	15.32	4.52	8.33	6.8	4.8	7.5	7.21	39.1	7.82	19.03	5.06	4.62	11.31	10.36	43	35.43	51.84
ABCB8	1.25	0.88	2.07	1.09	3.51	6.49	1.27	9.52	14.6	6.53	5.81	24.99	6.52	21.36	7.31	5.27	8.15	18.03	18.65	3.82	19.73	6.95	5.63	10.49
ABCB9	8.97	15.84	17.84	15.05	18.15	11.24	0.66	1.7	1.24	2.06	2.44	8.52	3.35	14.52	6.46	4.1	1.91	5.97	6.78	0.72	6.42	1.21	1.34	1.42
ABCC1	16.1	26.39	20.49	15.82	16.72	28.27	11.87	6.18	11.84	14.14	11.31	31.03	23.06	29.11	14.4	10.82	8.6	12.93	8.47	6.46	24.25	13.7	12.05	14.72
ABCC10	4.61	11.83	5.85	10.69	8.26	18.44	8.13	11.73	15.76	10.24	8.54	8.84	8.65	15.51	9.03	2.26	7.85	6.43	9.38	6.03	11.72	7.37	7.8	15.54
ABCC11	0	0	0.08	0	0	0	0	0	0	0	0	0.57	0	0	0.33	0	0	0.49	0.29	0.21	0.44	0	0.17	0.78
ABCC12	0	0	0	0	0	0	0	0	0	0	0	0.25	0	1.36	0	0	0	0	0	0	0	0	0	0
ABCC13	0	0.13	0.3	0.34	0.47	0.24	4.46	0.06	0	1.25	2.3	0	0.31	0.85	0.2	0	0.82	0	0	0	0	0.53	0	1.99
ABCC2	0.19	0.33	0.46	0.06	0	0	0.67	0.78	0	0.33	0.8	1.75	0.94	1.76	0.54	1.56	0.31	0.39	3.03	0.96	1.6	1.04	1.41	1.64
ABCC3	0.68	0.07	0.23	0.47	4.88	0.09	3.6	0.12	1.06	0.37	2.87	2.48	2.74	1.19	6.88	1.74	2.98	1.65	3.05	2.66	1.8	13.4	18.9	7.2
ABCC4	0.83	0.72	0.61	0.74	0	0.08	4.64	3.08	6.97	1.96	7.03	4.65	10.49	6.82	3.17	3.98	2.32	0.28	0.84	2.05	3.39	1.19	0.48	1.32
ABCC5	11.03	20.66	34.07	6.98	9.41	26.41	65.65	89.83	102.97	94.68	60.36	31.27	33.4	24.27	26.05	20.03	21.78	32.28	31.35	35.66	44.6	23.31	29.24	28.65
ABCC6	8.8	5.27	15.95	15.03	14.11	7.62	2.24	37.22	5.43	6.31	8.75	13.12	6.7	12.49	2.87	2.6	5.3	7.58	6.31	9.77	12.01	1.47	0.57	3.94
ABCC6P1	0.17	0.37	2.77	1.36	0	0.12	1.25	1.09	0	1.05	0.9	0.59	0.64	3.3	0.34	0.27	1.4	0	0.67	0.17	0	0	0.13	0.72
ABCC6P2	0	6.63	4.88	11.01	3.61	7.78	3.03	13.06	10.46	4.37	18.16	0	2.2	1.93	3.18	5.48	0.57	3.72	1.24	0.81	1.54	4.22	0	0
ABCC8	219.25	243.34	273.57	221.07	216.19	404.33	161.26	177.65	128	205.48	218.79	347.97	346.83	248.78	374.2	216.51	289.37	1787.56	616.07	1009.74	979.66	1002.35	1226.14	1674.75
ABCC9	9.5	16.1	19.55	12.55	16.66	8.04	15.89	25.66	33.67	45.77	56.27	161.54	89.36	351.89	50.63	66.14	44.18	48.22	113.35	39.19	183.7	41.39	51.77	30.38
ABCD1	0.38	7.69	1.28	2.25	2.75	1.5	1.81	1.44	0.98	3.62	1.11	4.83	1.3	7.76	0.59	0	0.68	2.43	3.23	0.62	3.32	1.57	1.4	1.47
ABCD2	0	0.38	0.16	0.03	0.07	0	0	0	0.1	0	0.15	0	0.08	0.17	0	0.13	0	0.06	0.55	0.07	0.91	0	0	0.09
ABCD3	40.37	12.29	22.14	15.91	24.34	34.65	22.72	27.48	35.49	40.25	75.7	40.79	84.84	34.16	59.09	44.69	33.28	19.62	13.09	49.13	40.41	40.09	41.93	27.19
ABCD4	6.08	14.52	10.13	7.29	8.83	9.71	11.22	21.34	31.16	20.03	21.62	7.39	17.81	14.71	12.2	8.72	14.27	9.13	6.42	13.71	11.51	18.09	15.56	33.48
ABCE1	19.35	22.92	21.24	11.47	13.11	20.69	26.71	26.49	51.84	33.79	36.25	21.07	20.1	25.53	20.06	14.83	21.01	6.74	11.54	11.89	25.46	25.25	26.93	23.88
ABCF1	23.17	67.02	24.64	28.65	42.34	85.4	44.79	26.61	34.95	52.39	57.5	54.17	47.28	71.43	80.86	47	49.44	27.2	31.37	33.81	102.35	54.49	56.94	83.98
ABCF2	9.03	6.98	18.25	12.03	2.75	10.86	21.43	7.13	25.45	18.76	24.68	20.31	11.95	25.04	33.38	9.95	18.38	8.68	10.31	13.5	34.53	24.47	24.24	34.9
ABCF3	9.15	31.03	20.74	15.48	43.48	23.85	17.34	25.78	14.63	30.53	22.05	30.46	48.64	36.85	24.64	25.03	30.88	22.57	19.35	26.88	34.56	26.97	31.25	44.59
ABCG1	46.81	32.6	89.06	58.86	43.19	31.1	34.88	23.52	25.63	50.39	50.69	38.23	38.91	45.02	28.52	18.44	17.41	36.72	24.17	25.79	38.35	39.71	54.06	50.22
ABCG2	0.19	0.23	6.35	0.34	0	0.17	2.56	0.58	0.7	4.67	2.67	10.43	7.29	3.63	2.84	4.3	2.84	0.09	0.16	0.2	1.82	0.26	0	0.13
ABCG4	0	0	0	0	0	0.04	0	0	0.14	0.27	0.22	0.33	0.96	1.48	0	2.29	0.69	0.36	0.16	0	0.45	0	0	0
ABCG5	0.22	0.96	0.52	0.08	0.2	0.08	3.59	0.08	0	0.99	0	0.3	1.11	2.28	0	0.74	0.96	0.34	0.61	0.19	1.25	0.74	0.18	0.76
ABCG8	0	0.44	0.76	0	0	0	1.78	0	0	0.09	0	0.22	0	0.34	0	0	0.23	0	0	0	0	0	0	0
ABHD1	0.24	0	0.57	3.02	0	0	0.18	1.67	0	4.6	0	0.5	0.37	0	0.52	0.3	0.53	0.55	0	1.59	0.69	1.22	0.58	2.07
ABHD11	21.05	26.97	32.69	23.89	11.29	16.99	17.37	6.21	3.39	15.51	16	10.04	15.29	11.15	10.55	13.09	13.01	7.71	5.6	7.74	6.51	9.05	17.42	34.11
ABHD12	9.7	7	4.72	7.17	6.24	17.89	21.24	24.5	41.02	24.4	18.6	75.18	44.62	56.13	84.61	33.71	58.93	57.35	22.46	18.1	51.34	54.24	58.13	54.8
ABHD12B	5.4	1.58	1.09	10.75	3.65	0.11	0	0	0.75	0.18	0	0.43	0.31	0.64	0.22	0	0	0	0.86	0.27	0.59	0	0	0
ABHD13	10.79	19.53	17.11	13.08	18.46	27.17	45.02	75.04	87.84	80.55	74.3	48.98	48.14	47.55	28.73	19.87	28.29	9.01	60.41	77.03	29.95	40.76	27.19	28.97
ABHD14A	29.35	31.68	45.06	45.12	18.83	27.68	55.62	80.33	25.99	48.66	53.16	25.05	37.85	27.81	39.43	21.69	47.01	19.74	9.26	17.88	18.92	23.25	20.01	18.68
ABHD14A-ACY1	0	0	0	0	0	0	0	0	0	0	0	0	0	0	0	0	0	0	0	0	0	0	0	0
ABHD14B	9.97	15.22	10.78	24.66	24.25	28.53	50.26	44.05	28.28	43.84	29.98	66.42	24.8	33.27	47.48	32.4	39.24	21.86	12.01	13.19	47.61	28.72	30.01	39.7
ABHD15	38.46	13.07	18.04	21.33	18.32	23.17	39.12	48.99	71.63	44.3	42.81	84.28	53.48	49.85	47.2	29.33	48.08	12.57	27.15	31.4	29.27	24.03	12.78	30.38
ABHD16A	30.68	91.52	32.49	50.81	27.75	73.92	45.57	33.94	66.04	43.02	48.8	30.97	32.55	41.21	23.59	17.54	28.41	23.57	12.7	34.65	40.8	18.45	30.63	23.17
ABHD16B	0.16	1.43	0	0.35	1.84	0.18	0.49	1.21	0	1.1	0.93	3.36	1.23	5.56	2.45	0.82	1.07	1.69	1.01	0.43	0.93	0.82	2.53	2.8
ABHD17A	8.16	5.07	14.03	8.8	6.78	2.46	10.76	12.55	5.69	8.66	8.79	12.62	4.22	25.82	2.41	1.74	4.04	10.88	9.58	2.6	3.93	2.5	2.89	5.78
ABHD17B	26.71	22.9	26.52	21.42	17.42	24.42	39.36	25.07	21.37	28.8	30.34	4.19	8.78	9.29	9.11	5.63	10.43	7.64	4.89	16.04	9.73	12.54	10.8	15.92
ABHD17C	6.49	0	2.02	0.74	4.45	3.26	3.16	6.31	11.7	2.97	2.07	2.86	1.85	2.52	1.59	3.48	4.46	3.09	1.1	2.61	5.98	2.87	3.42	3.77
ABHD2	39.14	43.72	44.56	39.27	50.18	43.03	46.19	50.43	48.65	53.4	68.28	80.37	122.37	46.33	80.93	55.23	48.07	62.32	46.42	118.92	80.49	115.61	97.22	95.16
ABHD3	5.45	8.99	16.69	14.72	12.52	4.49	13.97	10.92	30.07	15.1	12.52	15.82	49.83	15.23	29.45	21.71	20.8	35.94	37.64	24.25	70.98	57.51	76.45	91.66
ABHD4	22.37	24.94	15.37	14.31	13.82	25.4	23.05	21.98	6.18	13.5	21.22	10.47	19.93	9.49	14.5	9.27	9.52	22.48	33.35	28.49	42.78	17.82	22.24	31.25
ABHD5	16.2	15.44	9.42	23.04	33.03	10.43	10.89	13.19	17.15	15.72	22.29	10.87	20.39	11.26	7.92	11.72	10.04	5.7	8.14	13.21	11	24.6	23.73	17.11
ABHD6	1.89	2.47	6.19	1.18	0	6	2.7	5.29	2.38	8.83	7.85	9.42	4.91	19.25	11.1	6.82	12.55	7.75	14.9	5.06	11.95	11.3	12.2	13.03
ABHD8	0	0.4	2.26	0.45	1.56	0	0.1	0.37	0	0.47	0	10.24	1.46	18.41	0.44	0.35	0.6	9.84	6.27	1.82	5.49	0.46	0.66	1.89
ABI1	36.81	39.62	34.97	42.45	63.85	36.5	39.18	27.04	46.5	35.56	52.09	30.95	35.79	25.07	27.31	23.29	27.27	10.37	14.48	22.72	41.25	26.45	26.01	30.07
ABI2	38.39	72.93	60.75	36.87	66.51	53.59	60.78	78.66	54.2	80.09	113.53	44.7	69.62	44.04	47.45	40.87	43.46	20.74	36.54	47.59	55.22	50.78	63	62.64
ABI3	0	0	0	0.23	0	0	1.45	0.15	0	0.58	0	0.57	0	0.86	0	0	0	0	0	1.09	0	0	0	0
ABI3BP	0.93	2.16	9.25	1.88	1.49	2.47	7.54	8.98	13.47	11.15	10.33	1.66	3.65	1.9	1.96	0.64	1.67	0.42	0.71	2.27	3.71	1.07	0.15	0.82
ABL1	21	32.99	39.56	26.14	20.36	62.88	19.82	21.54	59.53	28.06	32.08	29.13	31.86	34.05	25.57	15.74	17.97	17.72	19.17	21.36	26.47	24.2	21.75	31.45
ABL2	10.07	12.38	13.2	13.47	14.89	14.08	13.79	21.5	15.27	21.21	42.63	20.29	35.53	16.77	18.6	12.27	13.09	10.09	10.23	20.41	23.36	18.92	18.94	16.39
ABLIM1	14.05	16.67	27.57	15.84	17.77	18.58	103.18	54.55	74.24	94.65	63.88	251.4	515.7	162.76	198.03	181.86	187.91	96.85	80.24	188.75	130.72	94.83	116.91	122.01
ABLIM2	11.55	25.01	24.96	12.49	4.1	27.02	35.34	23.13	47.19	39.04	24.4	32.24	29.52	58.42	47.07	19.57	38.73	13.63	18.31	31.76	30.65	14.44	24.55	24.38
ABLIM3	0.16	0	0.13	0	0	0	0	0.08	3.2	0.06	0.32	0.92	0.45	4.17	2.98	0	0	0.38	0.31	0.88	0.95	1.71	0.36	1.78
ABO	0	0.12	0.12	0	0	7.06	0.91	1.39	4.71	6.15	0.57	6.63	0.61	7.45	0.65	1.53	0.22	1.16	2.08	0	15.49	0	0	0.35
ABP1	1.35	1.78	6.32	2.3	3.25	0.5	0.1	1.56	0	0	0.74	0.99	1.11	1.22	2	0.16	0.42	0.05	0	0.11	0	0.07	0.05	0.22
ABR	42.73	38.7	90.3	55.48	81.84	80.03	21.49	15.62	27.86	27.86	31.63	45.99	19.4	63.44	38.71	25.18	25.76	44.43	59.23	29.69	76.18	52.2	62.38	81.09
ABRA	1.31	0.61	0.92	0.69	0	0	0	0	0	0.09	0	0.43	0	0	0	0.26	0.11	0	0.22	0	0.3	0	0.25	0
ABRACL	4.12	1.24	7.17	5.34	22.54	4.83	0	0	0	0	1.02	1.45	0.54	3.25	21.29	4.04	20.5	8.45	7.23	16.82	24.19	51.18	44.38	68.07
ABT1	0.31	2.09	4.24	5.26	5.23	4.6	4.39	6.07	2.06	6.88	12.3	11.54	3.66	13.82	4.92	4.33	7.61	8.34	6.04	4.86	3.25	8.76	8.36	12.65
ABTB1	12.79	6.09	5.22	12.82	8.27	0	4.88	1.36	5.09	7.47	6.62	5.52	5.27	5.17	3.74	4.97	2.02	13.73	9.17	4.27	7.89	5.46	4.44	5.16
ABTB2	1.48	4.16	5.14	2.5	2.63	2.59	2.65	4.64	0.31	1.57	7.74	3.12	4.47	5.61	0.81	1.61	0.63	0.94	2.4	3.05	1.65	1.46	1.66	0.8
AC2	0.92	0.96	1.55	1.04	4.83	0.87	0	0	0	0	0	1.29	0	0.86	0.15	1.92	0.53	0.16	0.14	0	0.2	0.23	0.17	0.48
ACAA1	8.96	11.93	13.11	10.18	6.63	21.8	20.78	10.34	20.4	16.28	17.21	10.7	27.93	13.31	23.94	9.53	14.45	12.14	6.89	15	23.52	22.95	22.39	28.19
ACAA2	55.25	28.79	51.59	38.67	65.48	100.7	80.5	93.6	58.94	101.17	121.14	46.16	123.46	39.84	155.96	82.17	142.83	24.73	18.81	76.57	59.02	113.2	133.35	135.27
ACACA	117.56	73.17	95.99	51.95	38.29	90.14	96.98	64.12	60.56	86.73	80.55	39.49	105.33	52.17	104.61	51.32	81.91	33.21	34.08	88.85	115.01	82.09	60.01	124.51
ACACB	7.36	10.42	7.44	4.76	8.79	15.24	6.53	6.77	6.58	13.4	13.45	26.41	18.57	28.68	17.74	11.12	14.26	33.32	35.43	26.57	47.98	15.37	16.83	18.15
ACAD10	4	9.55	11.44	5.83	5.12	6.35	9.52	5.13	8.56	11.65	7.18	14.81	5.8	15.2	9.69	4.39	8.69	7.82	19.27	8.37	27.03	7.22	7.71	13.53
ACAD11	6.87	10.92	10.34	8.12	2.93	26.04	13.89	13.83	25.82	19.2	20.9	6.22	16.29	15.62	20	9.07	12.12	11.11	27.11	26.97	74.09	27.43	25.81	34.29
ACAD8	2.26	9.4	24.33	14.66	24.65	10.6	42.66	25.39	57.63	27.86	28.44	24.51	17.09	30.66	31.24	8.2	15.93	9.13	17.34	16.79	28.94	19.81	17.19	34.33
ACAD9	18.94	23.97	18.32	13.19	26.13	11.24	30.65	7.33	3.76	15.75	13.89	22.84	15.88	20.8	12.88	7.92	14.6	11.87	16.42	12.71	22.19	17.13	12.57	26.93
ACADL	0	0	0.07	0	0	0	0	0	0.42	0	0	0.55	0	1.19	2.91	0.34	0.38	0.13	0.24	0	0.33	0	0	0.59
ACADM	56.54	16	44.2	29.54	19.44	57.15	34.1	35.38	54.88	37.79	40.29	8.86	16.62	10.09	13.99	8.39	16.89	4.2	12.48	25.47	32.65	21.11	22.19	37.34
ACADS	1.55	5.12	1.59	1.15	0.9	1.16	1.43	3.44	0.81	2.04	3.86	6.52	1.74	3.74	5.34	1.71	4.43	5.55	1.87	4.9	3.5	3.55	5.22	5.43
ACADSB	7.93	5.56	6.34	4.47	8.41	7.38	9.25	9.31	8.39	13.39	16.19	5.14	7.37	5.83	6.62	4.78	6.6	7.01	9.73	13.96	26.26	15.97	17.08	16.39
ACAN	0.64	0.57	0.36	0.41	1.28	0.37	0	0	0.06	0	0.19	2.26	0.15	0.41	0	0.13	0.07	0.49	0.2	0	0.37	0.11	0.05	0
ACAP1	2.42	13.04	1.88	8.42	7.83	1.26	2.15	1.03	0.41	1.93	0.33	0	0	1.42	0.25	0.29	0.12	1.19	0.71	0.15	0	0.96	0.82	1.37
ACAP2	25.45	23.75	33.3	26.04	23.95	11.72	22.9	21.08	52.2	31.67	37.82	26.96	27.76	23.9	23.67	16.51	22.55	12.57	16.32	20.92	38.61	31.73	28.83	31.06
ACAP3	14.11	12.91	17.49	17.29	2.96	28.63	13.88	11.21	16.49	17.66	7.54	34.64	14.97	49.15	9.09	6.3	8.83	53.67	56.53	10.84	45.81	10.53	8.59	13.82
ACAT1	6.07	17.41	15.51	11.59	4.5	23.27	74.91	51.59	36.97	55.91	33.07	32.49	36.68	26.34	49.85	30.29	35.07	28.47	25.09	28.55	95.36	55.05	70.13	53.32
ACAT2	48.55	33.25	92.94	17.44	68.33	14.71	8.51	17.19	33.17	18.47	57.67	12.71	13.32	9.74	31.69	23.42	48.63	4.81	2.79	6.22	12.74	7.47	19.71	17.18
ACBD3	8.78	28.05	16.06	14.42	17.42	53.54	35.46	35.15	27.63	52.26	47.07	52.12	70.74	36.91	43	41.32	41.02	18.94	20.89	39.96	69.59	32.14	48.15	47.51
ACBD4	8.56	8.6	11.62	10.77	8.87	4.92	1.05	2.8	1.4	2.53	1.14	17.23	1.92	8.68	7.37	5.2	1.95	9.36	7.87	1.02	8.88	2.49	2.5	2.4
ACBD5	15.88	23.11	17	17.32	9.97	18.38	22.13	24.2	36.43	30.93	35.86	7.02	14.86	9.67	21.26	13.24	22.42	6.5	7.19	20.33	24.13	43.3	33.65	42.01
ACBD6	8.53	18.29	22.44	9.66	9.04	35.4	27	35.81	66.13	27.37	38.39	23.29	66.39	36.16	52.12	20.63	33.48	11.96	14.82	31.27	35.77	59.79	39.29	74.28
ACBD7	10.8	19.37	30.64	23.24	18.62	19.23	9.25	9.26	6.55	15.39	14.2	1.4	2.82	2.9	0.36	0	1.43	0.88	0.88	2.12	0.72	0.85	0.3	0
ACCS	6.61	14.51	9.5	3.62	1.69	4.55	6.46	13.59	29.19	18.59	8.77	20.81	23.16	16.55	17.01	10.71	11.67	13.55	13.45	9.85	38.56	6.63	13.84	13.65
ACCSL	0	0	0	0	0	0	0	0	0	0	0	0	0	1.48	0	0.4	0	0	0	0	0	0	0	0
ACD	7.21	7.73	33.43	15.73	6.2	14.17	24.76	8.15	24.08	33.8	12.44	11.82	16.04	20.24	15.37	7.56	10.99	9.75	13.82	8.33	8.03	15.34	16.62	19.67
ACE	16.67	23.66	25.74	13.24	25.84	22.75	22.81	13.22	4.97	9.92	6.47	19.45	12.21	13.48	4.62	3.77	6.26	12.07	9.97	2.84	7.32	3.7	4.03	3.09
ACE2	0	0.15	0.05	0.59	0.66	1.41	0	0.13	0.15	0	2.35	0.34	0.5	0.77	0.98	0.31	0.27	0.38	2.05	4.02	2.35	0.69	0.49	0.99
ACER1	0	0	0	0	0	0	0	0	0	0	0	0.56	0	0	2.33	0	0	0	0.56	0	0	0	0	0
ACER2	7.2	7.67	2.3	1.36	2.07	6.51	3.39	1.33	1.45	4.75	4	3.12	5.78	7.56	9.46	2.16	2.84	1.97	3.12	2.78	11.97	14.34	5.88	11.89
ACER3	15.2	5.51	1.39	3.41	6.21	0.65	6.19	12.06	27.69	6.86	12.54	6.89	6.18	10.8	3	2.05	4.42	3.37	3.23	2.56	10.78	4.06	2.98	3.34
ACHE	1	0.23	0.06	0.32	0	0	1.09	0.21	12.36	0.65	2.28	4	0.68	2.82	1.2	1.34	0	1.41	4.27	1.23	1.15	1.68	0.81	1
ACIN1	40.71	78.23	45.2	47.41	70.34	129.97	36.91	48.13	77.71	101.24	82.48	105.22	55.42	143.68	42.51	26.4	58.56	43.09	81.48	25.25	162.27	33.34	31.82	72.85
ACLY	96.39	109.39	109.69	86.5	89.85	247.28	165.7	147.45	116.53	178.57	188.87	225.53	137.6	249.3	160.38	94.85	135.84	170.9	93.79	176.75	371.66	136.1	143.3	192.5
ACMSD	1.95	0.27	0.41	0	0	3.97	2.12	2.62	11.33	10.14	1.34	2.76	23.39	1.45	0	5.14	3.07	0.27	2.76	6.19	0	0	0.56	0.4
ACN9	1.24	2.38	2.87	4.42	1.3	1.77	12.1	14.89	6.82	4.86	7.98	2.02	1.91	3.92	4.82	1.95	8.4	1.45	3.47	4.43	8.37	4.01	6.37	3.13
ACO1	9.53	4.8	21.32	3.64	13.01	15.2	19.78	11.02	34.83	20.19	25.65	19.28	26.85	24.68	33.99	20.91	31.85	15.17	9.55	26.5	32.19	30.14	43.4	34.08
ACO2	4.37	14.85	7.04	16.12	9.77	13.53	27.9	19.25	22.21	24.51	18.43	60.54	32.05	67.66	50.29	23.96	31.35	38.79	20.67	19.35	49.33	49.72	38.53	60.96
ACOT1	8.95	4.24	6.13	2.85	8.4	1.98	4.9	20.99	10.46	12.73	6.19	12.67	8.23	6.73	12.26	12.57	14.81	7.07	3.36	10.51	9.79	5.48	6.28	14.61
ACOT11	3.06	12.52	16.26	8.53	10.74	8.3	3.79	7.83	8.06	6.54	10.2	11.48	9.17	21.82	3.16	4.41	8.99	9.86	12.03	7.45	13.7	8.14	8.45	6.8
ACOT12	0	0	0	0	0	0.08	0.22	0	0	0	0	1.2	1.1	0.9	0	0.18	0.16	0	1.2	1.54	0.83	0	0.17	0
ACOT13	12.99	31.06	24.71	12.05	17.5	19.97	19.4	10.82	31.33	18.74	21.43	22.73	29.9	17.19	36.72	22.33	31.38	7.03	22.44	18.94	30.8	28.54	18.3	36.21
ACOT4	0	0	0	0	0	0	0	0.57	0	1.51	0	1.83	2.15	3.3	3.06	1.57	1.16	1.63	1.83	0	2.53	1.2	2.76	0.92
ACOT6	0	0	0	0	0	0	0	0	0	0	2.53	1.21	0.89	0	1.27	3.35	0	0.34	0	1.17	1.68	2.48	0.35	0
ACOT7	0.86	4.1	16.57	7.48	1.91	33.37	31.01	16.46	28.67	15.54	7.63	9.33	32.49	19.13	17.51	11.97	11.47	2.36	2.55	7.89	7.62	12.83	8.87	9.92
ACOT8	14.09	2.45	13.56	13.63	3.19	4.96	5.93	24.68	15.49	6.98	10.36	23.6	10.37	18.64	14.27	3.96	7.68	12.83	12.49	5.48	17.92	17.36	9.69	19.49
ACOT9	9.29	2.76	3.42	14.09	6.25	4.54	4.36	2.25	6.19	10.04	7.51	25.06	12.93	7.19	10.47	5.31	6.71	2.86	2.64	1.74	4.2	3.27	3.14	1.31
ACOX1	11.13	20.99	14.75	11.48	21.3	16	29.28	26.02	25.53	32.83	35.17	16.37	12.85	17.58	18.21	13.26	22.24	8.9	6.51	12	18.41	18.32	31.53	17.42
ACOX2	0	0.15	1.53	0.81	0	0.55	0.19	0	0.22	0.63	0.35	0	0	0.39	0	0	0	0.29	0	0.33	0.35	1.05	0	0
ACOX3	2.66	1.62	6.14	1.5	3.71	10.83	1.99	6.12	2.11	11.28	10.45	5.06	4.02	10.65	6.58	2.52	4.56	5.64	7.92	4.71	7.54	6.7	4.53	8.58
ACOXL	0.24	1.5	1.89	0.59	1.04	1.33	0.55	0.19	0	0.2	0.69	2.87	0.92	3.62	2.47	1.69	0.53	2.51	3.26	3.19	8.41	2.65	2.32	3.63
ACP1	33.83	34.4	34.1	25.35	24.51	47.85	77.22	110.08	137.55	79.44	104.12	47.5	114.05	52.2	133.88	114.2	146.68	33.32	23.75	81.36	57.4	106.02	114.31	139.18
ACP2	21.8	29.14	20.4	14.44	24.97	16.66	21.97	23.09	34.99	30.4	31	44.51	12.14	62.26	21.54	8.63	21.45	26.84	21.42	8.26	26.6	8.23	11.77	14.75
ACP5	0	0	0	0	0	0	0	0.42	0.36	0.17	1.69	4.09	1.8	7.94	1.06	0.25	1.72	2.65	1.71	0	5.86	1.95	0.69	0.84
ACP6	3.11	17.61	11.02	6.26	13.65	11.38	5.15	17.07	4.72	7.42	19.06	7.35	12.87	9.09	12.92	10.73	30.22	10.02	21.29	14	30.07	18.07	44.21	61.43
ACPL2	0.58	3.46	6.01	1.09	1.11	0.59	0.74	0.63	3.94	2.99	5.59	2.95	4.18	7.65	1.16	0.87	2.38	3.62	2.44	1.5	10.61	1.49	1.82	4.24
ACPP	17.77	4.8	0.42	11.25	64.15	0	0	0	0	0	0	0.65	0.24	0.57	0	0.12	0.27	10.19	35.06	14.6	9.83	8.91	9.35	6.78
ACPT	0	0	0.76	0	7.6	0.47	0	0	0	0	0	0.89	0.66	0	0	0	0	0	0	0	0	0	0	0
ACR	0	0.25	1.62	0.46	5.78	0	2.08	0	0	0.36	1.82	4.29	0.79	3.87	2.29	3.57	1.5	2.7	0.44	5.04	1.21	6.9	2.29	0.9
ACRBP	0.56	5.31	5.2	8.33	0.4	2.98	7.66	1.63	2.23	6.79	3.56	7.58	2.78	5.23	6.48	3.82	1.59	6.17	7.91	3.27	13.51	6.1	7.74	11.3
ACRC	0.8	0.48	0.05	0.1	2.75	0.2	2.02	0.33	1.78	1.6	5.11	3.53	13.21	3.08	1.84	3.63	4.01	1.45	2.98	0.47	1.53	0.91	0.43	0.77
ACRV1	0.13	0.36	4.46	0.33	0.2	0.33	0.46	0	7.25	0	0	2.4	3.41	3.78	1.7	0.66	0	0.9	0	0.81	0.88	0	1.26	0
ACSBG1	0	0.07	0.28	0.06	0	1.8	0	1.31	0	1.29	1.67	0.44	1.24	1.2	0.13	0.59	0.13	0	0.73	0.31	0.33	0	0.14	0.81
ACSBG2	0	0	0.07	0.06	0	0.38	3.29	0	0	0.39	0.33	1.67	0.87	0.72	0.12	1.1	2.01	0	0.72	0.3	0	0	0	0.4
ACSF2	0.15	2.02	3.84	0.74	0.3	1.12	1.79	12.42	6.53	3.46	1.12	0	0	1.04	0	0	0	1.1	0	1.34	2.92	1.15	0	1.17
ACSF3	17.31	3.9	5.74	3.34	2.01	3.65	1.46	2.87	0.92	3.37	6.09	6.12	3.86	10.17	1.1	2.45	2.22	3.24	4.06	2.29	4.93	1.05	2.79	5.96
ACSL1	27	44.58	20.63	33.39	31.34	15.14	25.93	22.05	6.99	26.36	36.39	16.84	15.3	13.48	49.09	15.86	17.23	42.99	23.92	31.89	73.83	87.27	95.78	53.4
ACSL3	10.57	7.18	18.44	14.18	16.88	24.3	27.09	30.78	30.17	32.43	27.64	15.89	53.34	32.98	20.49	9.56	15.19	13.46	17.72	13.31	69.96	30.55	25.05	28.35
ACSL4	3.15	2.7	3.53	2.97	1.55	2.23	11.03	6.21	2.44	4.22	5.6	20.06	21.38	13.84	18.92	6.27	10.28	7.12	7.45	6.71	27.66	14.33	10.29	13.02
ACSL5	0.32	5.2	0.13	1.55	1.38	0.24	0.33	0.25	0	1.04	1.34	2.26	1.03	0.68	0.23	0.41	0.24	1.26	1.36	0.86	1.88	1.29	0.52	0.49
ACSL6	0.85	0.49	4.9	1.19	0.68	0.56	2.72	2.2	3.57	4.39	5.97	6.92	4.28	13.01	1.69	5.08	5.25	4.97	2.32	3.68	1.97	4.75	5.03	4.16
ACSM1	0.41	1.58	0.39	13.74	0	0	0.13	1.43	0	1.28	1.44	0.69	2.34	1.31	0.18	2.13	0.18	0	0.7	0.74	1.6	0	0.5	0
ACSM2A	1.66	1.2	1.43	0.61	1.64	1.72	2.1	0	0.19	0	0.3	0	0.26	0.51	0	0.14	0.12	0.25	0	0	0.94	0	0	0
ACSM2B	0	0	0	0	0	0	0	0	0	0	0	0	0	1.11	0.13	0	0.26	0	0.31	0	0.34	0	0	0.26
ACSM3	0.7	1.47	10.79	1.15	1.79	4.89	7.75	5.45	2.74	6.75	7.88	12.58	2.79	3.24	9.35	1.04	1.36	3.15	1.53	2.7	3.92	3.28	1.99	1.85
ACSM4	0.49	0.29	0	0.18	1.98	0.09	0	0	0	0	0	0	0	0	0	0	0	0	0	0	0	0	0	0
ACSM5	0	0	0.35	0	0	0	0	0	0	0	0	0.49	0	0.8	0.26	0	0.13	0	0	0	0	0	1.95	0
ACSS1	10.88	1.02	3.28	6.93	0.62	0.72	0.77	0.33	1.17	2.53	5.57	0.43	0.94	0.97	0.2	0.48	0.34	1.32	1.04	2.09	1.18	0.78	0.25	1.54
ACSS2	0.34	2.34	28.9	2.48	5.71	1.27	6.84	5.02	1.85	4.53	4.54	12.47	10.68	18.42	17.62	3.46	6.79	12.45	15.09	5.41	24.62	9.77	13.76	19.36
ACSS3	0	1.57	0.95	1.49	0.32	2.36	0.79	1.25	5.26	3.7	4.56	0	0.39	0.59	0.14	0	0	0	0	0	0	0.32	0	0
ACTA1	0	0.72	10.21	0.36	0.56	0	0	0.73	4.58	6.28	2.78	0.4	1.77	7.85	0	0	4.68	0.45	0	1.03	0	0	0.47	0.33
ACTA2	0	5.41	48.92	1.23	1.76	0	2.08	6.8	60.23	1.3	30.05	2.89	38.89	4.15	2.65	0.3	4.99	1.54	1.82	0.98	5.83	7.19	0.77	17.67
ACTB	2441.54	2339.76	1983.33	3527.36	4457.59	1941.01	2596.22	2447.95	2077.42	2718.85	2142.51	918.64	1685.95	2838.96	868.13	703.09	990.25	584.42	862.85	722.69	1203.65	854.62	1411.96	1235.6
ACTBL2	0	0	0	0	0	0	0	0	0	0	0	0.21	0	0.32	0	0.26	0	0	0	0	0.58	0	0	0.53
ACTC1	1	1.18	0.32	0.77	0.62	0.81	0.06	0.7	0.28	3.85	1.54	2.24	3.04	2.65	3.24	2.53	1.01	3.57	9.76	4.17	14.7	2.73	6.37	4.37
ACTG1	816.75	775.66	908.61	783.13	1167.59	811.06	1902.37	1617.42	1462.77	1670.91	1474.19	491.36	784.24	1570.62	432.09	349.53	561.2	411.19	607.63	426.34	478.91	703.89	1208.23	930.29
ACTG1P4	0	0.09	0	0	0.59	1.15	0	0	0	5.46	0	2.7	2.86	1.68	2.66	0.55	0.79	0	1.72	0	1.25	4.76	2.09	1.47
ACTG2	0	0.28	9.68	0	0.39	0	0	2.34	6.75	1.03	2.51	0	47.77	0	0	0	0	0.56	0	0.39	0	0	0	0
ACTL10	1.39	1.67	0.17	0.54	0.94	0.7	0.11	1.28	0	3.01	0.81	0.88	1.94	2.21	0.15	0	0.46	1.15	0.88	0.37	1.62	0.72	0.34	0.49
ACTL6A	6.29	8.11	21.13	6.16	12.21	21.41	13.33	25.7	79.59	24.22	32.26	9.4	12.49	11.45	16.39	11.98	19.9	5.9	2.89	8.82	23.08	21.45	18.22	22.96
ACTL6B	0	4.67	8	2.99	1.38	2.49	10.4	2.93	0	12.52	7.58	31.65	9.18	34.46	14.67	4.3	9.31	17.37	23.71	5.51	33.29	5.11	18.8	6.81
ACTL7A	0.3	0	0	0	0	0	0	5.3	0	0	0	0.84	0.92	3.77	0	0	0.22	0.7	2.51	2.41	0.58	3.08	0	0
ACTL7B	0	0	0	0	0	0	0	0	0	1.76	0.59	0	0	1.28	0	0	0.45	0	0.43	1.64	0.59	0	0.25	0
ACTL8	0	0	0	0	0	0	0	0	0	0	0	0	0.94	0	0	0	0	0	0	0	0	0	0	0
ACTL9	0	0	0	0	0	0	0	0	0	0	0	0	0	0	0	0	0	0	0	0	0	0	0	0
ACTN1	44.53	40.76	54.62	95.92	81.63	27.54	27.42	27.54	17.94	30.12	24.78	129.65	71.11	131.59	51.33	39.94	50.08	54.1	27.24	22.52	64.4	38.97	31.16	41.21
ACTN2	0	0.44	1.17	2.29	0	0	0	0	1.8	0	0.18	0	0.1	0.26	0	0.32	0.07	0.44	0	0.77	0.18	0.32	0.15	0
ACTN4	55.13	79.46	44.85	99.95	90.5	102.46	50.17	71.44	51.54	63.98	55.95	126.34	102.96	155.86	99.71	53.16	81.33	112.83	96.64	66.26	140	89.12	121.2	141.99
ACTR10	11.73	14.53	24.78	10.06	5.75	11.04	35.14	36.15	31.43	35.92	44.48	16.87	27.75	14.18	36.55	33.11	41.36	13.52	10.16	27.81	25.37	51.41	44.99	52.28
ACTR1A	35.72	24.39	89.65	41.52	105.6	88.43	48.4	49.58	36.52	62.42	54.1	53.32	59.76	60.48	73.43	44.29	59.63	27.12	29.38	40.99	51.26	48.08	59.89	81.75
ACTR1B	40.94	28.41	30.42	49.61	22.59	13.22	28.02	37.48	58.74	49.45	40.96	25.23	52.66	18.21	44.63	33.93	35.8	33.01	11.59	55.92	31.15	56.96	41.28	77.17
ACTR2	54.5	96.31	49.86	65.45	89.26	77.18	79.35	86.95	109.63	82.48	112.68	49.74	51.99	56.64	63.78	55.22	59.45	20.89	31.93	47.03	84.24	82.27	88.19	86.26
ACTR3BP2	0	0	0.3	0	0	0	0	0	1.18	0.19	0	0.45	0	0	0	0.28	0	0	0	0	0.62	0	0	0
ACTR3BP5	0.86	0.52	1.3	0.29	0.35	0.48	0	0.19	0	0.45	0	0	0.8	0	0	0.22	0	0.2	0.73	0	0	0	0.21	0
ACTR3C	2.7	10.67	6.58	9.59	3.66	10.11	9.23	4.5	1.74	5.61	10.3	15.31	9.12	19.3	3.36	6.68	6.83	14.92	16.82	4.82	33.56	8.07	7.48	9.8
ACTR5	2.9	0.82	2.78	2.02	0.92	4.71	9.56	2.03	0.83	8.32	5.6	1.67	5.61	4.32	5.97	3.22	5.8	1.07	1.2	3.66	2.96	10.9	5.68	12.32
ACTR8	7	9.69	11.99	6.7	5.01	11.38	4.07	14.32	13.57	18.72	20.33	7.64	35.49	11.76	20.5	9.93	11.14	5.45	8.15	11	23.23	15.59	15.45	17.54
ACTRT1	0	0	0	0	0	0	0	0	0	0	0	0	0	0	0	0	0	0	0	0	0	0	0	0
ACTRT2	0.1	0	0	0	1.63	0	0	0	0	0	0	0	0	0	0	0	0	0	0.42	0	0	0	0	0
ACTRT3	1.2	2.03	0.25	0.78	1.82	2.61	0.11	0.92	0	1.1	0.41	1.19	1.31	2.24	0	0.73	0.94	0.33	0.89	0.38	0.41	0	0.17	0.25
ACVR1	6.63	3.58	5.62	3.98	7.31	23.79	23.54	14.48	14.57	26.61	38.93	19.41	19.07	42.62	35.34	18.68	35.26	16.37	21.73	11.33	38.92	42.17	45.67	61.75
ACVR1B	46.78	58.16	49.24	35.32	51.34	121.23	7.69	6.61	26.26	2.58	29.73	8.45	11.92	12.75	3.08	5.5	2.06	29.4	48.27	51.71	45.59	38.88	55.01	68.34
ACVR1C	114.48	98.18	123.88	77.59	67.63	117.43	51.41	64.79	30.52	67.08	69.4	8.12	8.55	10.4	4.28	5.26	10.52	1.08	14.75	16.72	23.57	5.81	8.61	17.78
ACVR2A	6.6	4.5	10.63	4.67	6.15	9.8	12.6	12.16	23.4	14.57	22	4.82	7.12	7.06	4.49	3.76	4.84	2.56	7.7	4.02	12.77	3.77	7.19	9.54
ACVR2B	8.46	5.96	9.79	10.29	9.76	13.72	7.96	14.13	27.23	12.54	19.24	3.71	6.28	3.73	4.86	2.51	6.51	1.09	5.06	3.9	4.66	4.42	6.03	11.17
ACVR2B-AS1	0.78	1.23	2.54	2.42	0.77	1.04	0.09	0.18	2.05	2.02	1.62	1.41	0.86	4.25	1.59	1.44	0.5	2.1	2.12	1.2	2.59	0.77	0.41	1.76
ACVRL1	0.34	0.89	3.25	0.44	0.39	1.39	1.14	0.21	4.93	0.34	2.84	0.33	0.42	0	0	0.1	0	0.18	0.33	0.95	0.91	0	0	0
ACY1	7.12	2.25	5.44	2.54	3.63	3.09	3.52	5.01	0	3.3	11.47	5.03	3.82	6.36	8.78	8.53	6.44	5.94	1.84	4.73	5.24	1.34	10.86	8.89
ACY3	0	0	0.79	0	0	2.7	0	1.8	0	0	0	0	0	0.69	0	0	0	0	0	0.89	0	0	0	0
ACYP1	9	13.09	21.78	23.44	2.63	38.62	123.4	91.4	36.88	82.13	74.03	10.24	39.69	6.13	73.98	57.33	81.75	3.42	3.07	31.09	16.96	37.43	74.25	51.97
ACYP2	3.04	6.44	9.08	10.01	4.6	7.21	42.62	24.02	6.51	24	44.53	5.91	12.36	2.22	12.38	7.87	17.02	2.2	4.44	12.03	3.42	6.46	12.91	14
ADA	3.53	0.44	1.11	2.27	4.4	1.56	0.57	5.65	0	0.16	2.16	0	0.86	1.17	0.2	0.48	0.41	0	0	0.25	0	0	0.68	0
ADAD1	0	0	0	0	0	0	0	0	0	0	0	0	0	0	0	0	0.17	0	0	0.2	0	0	0	0
ADAD2	0	0	0	0	0	0.08	0	0	0	0	0	0	0	0	0	0	0	0	0	0	0	0	0	0
ADAL	4.22	0.95	8.63	1.37	0.12	0.97	4.87	6.68	2.05	3.45	8.69	1.28	1.75	5.3	7.25	2.71	5.19	1.89	3.67	1.32	10.09	12.94	2.53	11.84
ADAM10	19.59	51.38	33.07	35.25	20.65	42.64	46.82	57.51	42.14	62.99	75.52	43.83	59.32	37.68	63.82	53.38	56.65	16.27	22.98	29.15	58.69	49.67	45.22	47.26
ADAM11	0	0.27	0	0	0.22	0.04	0.08	0.75	0.39	0.55	0	0.45	0.17	0	0	0.28	0	0	0.23	0	0	0	0.13	0.19
ADAM12	6.3	0.56	3.92	1.59	0.61	0.42	0.82	0.46	3.34	1.73	3.36	0.2	0.28	0.29	0.56	0.18	0.73	0.11	0.57	0.47	0.64	0.08	0.63	0
ADAM15	2.45	1.52	0.85	6.93	1.01	2.33	2.41	1.47	8.84	1.86	1.79	5.87	2.86	9.84	3.39	2.39	3.09	4.88	3.01	0.66	3.41	2.33	1.28	2.49
ADAM17	30.58	35.46	34.03	19.92	34.7	18.36	20.88	25.69	35.78	19.51	23.95	28.57	46.65	25.52	36.92	23.42	32.79	15.66	17.1	34.72	30.92	74.75	52.21	55.1
ADAM18	0	0	0	0	0	0	0	0	0	0	0	0	0	0.44	0	0	0	0	0	0	0	0	0	0
ADAM19	1.25	4.84	0.65	3.06	1.05	3.34	0	0	3.08	0.96	5.04	0	0.56	0	0.15	0	0	0	0	0	1.1	0.46	0.11	0.74
ADAM1A	3.57	5.27	3.31	1.37	0.47	4.77	5.37	3	7.08	5.96	9.75	2.29	10.68	6.59	2.38	1.91	3.18	1.74	3.76	2.79	10.03	4.91	2.41	5.36
ADAM20	0	0	0.42	0	0.41	0	0.09	2.1	0	0.35	1.05	1.78	1.68	1.6	0.66	2.2	3.35	3.13	7.64	0.33	5.61	3.28	0.49	3.81
ADAM20P1	0.14	7.81	0.06	0	0.81	0.21	0	0.2	0	1.51	0.8	3.89	1.57	3.52	1.72	0.36	0.62	3.69	14.24	1.12	7.23	5.86	1.69	3.72
ADAM21	0	0	0	0.34	0	0.22	0	0	0	0.11	0	3.56	0.46	2.34	3	1.07	0.72	2.44	15.3	0.52	4.54	1.94	1.59	3.66
ADAM21P1	0	0	0	0.13	0	0	0	0	0	0	0	2.03	0.37	1.31	0	1.53	0	0.33	1.53	0.19	0.8	0.53	0	0.23
ADAM22	5.62	3.96	5.81	3.32	1.98	6.02	8.66	13.6	11.02	22.49	18.38	5.01	13.93	10.42	5.38	9.03	5.8	1.67	9.21	7.21	24.03	4.18	6.2	5.67
ADAM28	0	1.06	0.08	0.07	0.6	0	0	0.14	8.16	0.56	0.77	0.27	0.8	0.83	0	0	0	0.17	0	0.35	0	0	0.16	0
ADAM29	0	0	0	0	0	0	0	0.43	0	4.14	1.33	1.2	0.71	1.09	0.13	0	0.2	0.53	0.72	0.15	0	0	0	0.6
ADAM30	0	0	0	0	0	0	0	0	0	0.16	0	0	0	0.3	0	0	0	0.44	0.2	0	0	0	0	0
ADAM32	0	0	1.05	0.14	0.28	0.06	0.86	1.47	0	1.58	2.01	1.46	0.32	0	0.27	2.34	0.33	0.23	0.79	0.17	0.73	0.33	0.24	0
ADAM33	0.94	4.93	32.12	2.27	1.26	2.42	1.72	3.42	55.06	0.51	4.33	0	2.14	0	0	0	0	0	0.64	0	0.27	0	0	0
ADAM3A	0	0	0	0	0	0	0	0	0	0	0	0	0	0	0	0	0	0	0	0	0	0	0	0
ADAM5	0	0.36	0.23	0.11	0.1	0	0	0	0	0	0	0.35	0	3.33	0.43	0	0	0	0	0	0	0	0	0
ADAM6	0	0	0	0	0	0	0	0	0	0	0	0.32	0	0	0	0	0	0	0	0	0	0	0	0
ADAM7	0	0	0	0	0	0	0	0	0	0	0	0	0	0	0	0	0	0.18	0	0	0	0	0	0
ADAM8	13.91	10.84	2.73	12.22	16.76	0.83	2.87	5.9	0.68	5.78	7.26	1.61	4.43	3.54	0.81	2.27	1.44	2.61	2.15	3.24	1.04	1.59	1.24	0.97
ADAM9	23.11	18.9	26.44	17.57	14.66	38.56	22.23	24.72	29.03	36.04	47.84	46.51	90.17	38.78	51.3	43.66	41.92	10.47	14.75	35.56	36.07	30.44	35.77	32.54
ADAMDEC1	0	0	0	0.13	0	0	0	16.12	0	0	0.37	0	0	0	0	0	0	0	0	0	0	0	0.15	0
ADAMTS1	0.57	0.86	24.81	1.34	6.11	1.92	8.48	5.54	41.52	3.15	15.97	0.25	3.61	0.38	3.68	0.08	0.33	0.28	0.51	2.26	2.78	1.23	0.51	0.21
ADAMTS10	1.16	0.89	0.94	0	1.14	0.51	0.26	0.9	11.55	0.17	0.57	0.48	0.25	0	0	0.1	0.18	0.16	0.46	0.21	0.23	0.2	0	0
ADAMTS12	0	0.93	2.91	0	0.08	0	0	0.55	10.54	0	1.69	0.61	0	0.54	0.52	0.37	0.66	0	0.25	0.16	0.52	0.99	0.07	0.1
ADAMTS13	9.53	8.21	15.99	8.62	4.77	19.54	13.46	5.38	12.59	22.21	11.03	7.34	6.31	9.87	9.9	12.17	8.34	13.7	5.07	11.16	11.1	15.65	13.47	18.61
ADAMTS14	0	0.29	0.32	0.26	0.08	0.34	0	0.37	7.75	0	0.15	0	0.08	0.34	0	0.07	0	0	0	0	0.63	0.97	0	0
ADAMTS15	0	0	0.03	0	0	0	0	0	3.14	0.25	0.14	0.1	0	0	0.27	0.57	0.11	0.17	0.1	0.07	0	0.17	0.48	0
ADAMTS16	0.24	0.63	1.06	12.41	0.38	7.52	1.24	1.48	3.8	1.21	4.7	0.24	0.17	0.18	0.06	0.07	0.25	0	0.36	0	0.16	0.1	0.27	0.39
ADAMTS17	0.61	0.1	0.98	0.7	1.64	0.9	0.07	0.5	0.48	0.5	0.51	0.28	0.5	0.93	0	0.57	0	0.17	0.34	0.2	1.27	0.08	0.18	0.29
ADAMTS18	0	0.1	0.26	2.13	0.06	0	6.58	8.65	2.41	9.36	17.33	20.7	19.92	6.86	5.14	7.56	3.95	0.11	0	0.16	0	0	0.44	0
ADAMTS19	0	0	0.18	0	0.15	0.25	0	0.44	0.14	0.06	2.15	0	0	0	0	0.1	0	0	0	0	0	0	0	0
ADAMTS2	11.82	20.8	15.56	9.42	31.13	51.21	7.64	5.74	16.91	3.64	6.87	23.05	20.72	16.23	26.53	16.15	19.93	46.99	34.47	17.94	40.99	22.34	32.75	43.25
ADAMTS20	0	0	0.12	0.11	0	0	0	0	1.96	0	0.56	0	0	0.15	0	0	0	0	0	0	0	0	0	0
ADAMTS3	0	0	0	0	0	0.03	0	0	0.88	0	0.14	0	0	1.06	0	0	0.05	0	0	0	0	0	0	0
ADAMTS4	2.24	4.12	10.01	4.27	3.37	3.46	0.69	5.38	61.6	0.22	5.6	1.51	3.92	0.61	1.98	0.17	0.07	0.3	0.54	4.21	7.07	0.11	0.47	0.11
ADAMTS5	4.65	3.36	6.88	5.41	2.87	5.54	1.82	1.27	7.35	2.74	3.07	0.06	0.22	0.37	0	0	0.06	0.71	1.52	3.78	5.15	3.2	0.56	4.62
ADAMTS6	4.81	3.33	6.54	2.41	4.95	2.21	12.71	11.81	12.31	8.9	10.93	3.78	2.83	3.14	1.43	2.12	0.57	0.93	2.48	1.97	3.59	0.15	1.15	0.6
ADAMTS7	0	1.4	2.95	2.01	0.06	0.03	2.56	0.69	1.76	0.14	0.44	0.33	0.12	0.3	0	0.12	0	0	0.21	0	0.82	0.31	0	0
ADAMTS8	1.25	1.2	0.37	1.74	3.82	0.98	0.19	0.68	3.08	1.84	0	0.53	0.12	0	0.25	0.16	0.28	1.18	2.38	0.34	0.73	0.21	0.09	0.88
ADAMTS9	0.09	2.99	8.67	2.71	6	0.32	1.63	1.03	38.22	1.05	10.29	2.88	1.18	0.24	0.67	0.63	0.1	1.62	0.69	2.56	2.04	0.51	0.46	0.92
ADAMTS9-AS2	0	0	0.3	0	0.43	0	0.1	0.34	1.63	0	0	0.27	0	0.4	0	0	0	0	0	0.34	0	0	0	0.22
ADAMTSL1	5.39	4.67	5.59	7.42	7.28	22.52	2.18	1.66	13.67	2.02	3.98	0.18	0.51	0.69	0.44	0.3	0.28	3.23	2.29	4.51	3.82	0.82	0.36	1.48
ADAMTSL2	6.37	4.87	7.65	7.95	6.11	9.21	0.75	1.15	1.2	1.27	1.42	56.48	3.78	29.75	8.39	6.03	8.66	59.54	6.19	3.02	7.85	4.46	5.29	5.3
ADAMTSL3	109.38	129.8	204.76	122.68	147.19	108.15	3.37	3.33	22.9	7.62	14.26	6.68	16.9	14.59	5.6	7.98	5.43	6.5	4.5	7.01	9.8	6.35	7.4	5.14
ADAMTSL4	2.75	9.77	22.47	7.72	5.64	2.07	1.41	0.38	16.34	1.97	2.46	9.98	3.19	3.14	0.93	0.73	0.94	6.51	2.08	1.33	2.6	2.04	2.58	0.61
ADAMTSL5	0.06	0.32	0.83	0.13	0.94	0.82	0	0.19	0	0.3	0	0.73	0.35	2.19	0.22	1.04	0.13	0.12	0	0	0.33	0	0.14	0
ADAP1	0.23	0.32	1.48	4.4	0.52	5.03	1.75	1.33	2.81	1.45	0.44	2.89	0.94	2.41	0.5	0.2	0.34	1.79	1.28	0.54	0	0.26	0.19	0
ADAP2	5.49	0	1.38	0.35	0.35	0.35	0.24	0.06	0.39	0.09	0.31	8.65	1.14	5.84	5.94	4.48	2.5	2.76	3.67	3.3	19.55	7.4	7.44	15.69
ADAR	48.98	98.92	51.98	62.95	92.52	102.07	61.27	82.67	45.13	99.68	90.22	174.49	140.93	170.68	133.6	89.17	120.02	99.44	97	93.68	274.87	115.91	146.09	189.78
ADARB1	0.8	6.64	5.03	1.33	1.73	1.45	10.9	2	19.12	4.24	4.9	3.79	5.15	15.07	1.64	3.84	3.3	3.62	3.46	1.69	9.58	4.31	3.62	4.31
ADARB2	1.49	5.43	4.63	3.79	5.44	3.42	0.3	0.33	0	0.4	0.89	0.46	1.83	0.31	0.87	0.4	0.78	0.26	1.05	1.12	0.38	0	0.21	0.23
ADARB2-AS1	0	9.02	3	0.25	0	0	0	0	0	0	0	0	0	0	3.05	0	0	0	0	0	0	0	0	0
ADAT1	13.17	18.13	23.39	11.07	18.94	15.15	3.2	5.93	7.24	9.82	9.6	20.47	14.25	17.31	15.83	10.21	7.88	8.88	7.17	6.56	21.27	14.41	12.9	18.37
ADAT2	1.88	11.15	5.58	6.53	4.08	34.77	5.28	7.91	7.52	2.97	5.28	3.55	5.37	6.76	2.1	2.23	2.75	6.78	0.97	4.13	4.37	4.26	4.57	1.89
ADC	2	1.15	0.31	1.89	0	5.85	1.87	3.32	2.78	4.61	4.45	4.82	3.79	7.1	3.85	0.66	1.81	4.43	7.33	4.46	7.47	3.35	3.89	11.53
ADCK1	8.22	9.75	2.66	3.11	1.89	1.79	9.71	16.19	8.45	16.82	11.51	13.8	9.04	18.84	22.5	10.58	15.01	5.87	8.15	4.38	12.18	8.65	11.65	12.99
ADCK2	8	2.35	10.18	4.07	8.08	22.89	3.38	10.46	21.45	18.09	16.94	8.53	7.55	7.93	15.68	11.85	5.83	6.58	4.84	9.77	9.79	17.98	11.23	20.23
ADCK3	36.07	28.89	46.48	20.05	19.26	30.39	43.78	44.84	88.63	45.72	34.5	26.92	106.22	18.15	71.39	28.96	44.1	33.14	27.86	132.03	37.1	95.93	63.36	88.71
ADCK4	15.88	3.1	11.8	8.44	12.24	8.98	5.34	16.42	6.76	8.62	10.2	20.05	11.13	23.41	8.25	4.03	2.85	10.15	22.87	7.42	17.83	3.1	6.18	3.83
ADCK5	0.62	9.93	1.1	4.1	0	0	11.92	8.27	8.07	11.82	7.24	3.03	0.48	5.94	1.7	2.39	5.53	3.89	3.65	1.66	2.99	3.73	3.78	7.06
ADCY1	9.72	10.13	6.38	5.73	19.94	17.46	19.61	6.61	3.61	13.62	14.79	35.75	46.64	26.92	49.8	23.56	36.67	10.24	4.97	33.01	20.83	31.6	15.76	37.99
ADCY10	0.59	0.72	2.65	1.84	1.88	1.37	0	0.29	0	1.71	0.52	0.51	1.88	1.81	0.27	0.31	0.09	0.18	0.51	0.89	1.03	0.28	1.15	0.59
ADCY10P1	5.2	2.9	4.71	1.78	1.16	0.83	0.7	1.78	4.65	4.85	6.47	2.34	16.79	7.16	6.6	5.17	6.4	1.6	2.31	4.92	6.78	4.67	3.13	7.75
ADCY2	3.22	2.46	0.63	0.46	1.04	2.85	1.91	6.95	11.63	6.1	6.7	4.48	7.43	9.05	1.35	3.46	6	0.15	0.18	2.06	0	0.22	0.11	0.08
ADCY3	0	0	2.99	0.09	2.32	0	0.2	1.26	1.19	0.11	1.32	6.89	5.32	12.99	8.83	2.6	3.05	1.79	1.81	1.53	6.29	2.28	0.82	1.46
ADCY4	3.54	1.92	1.16	5.48	6.12	0	2.95	0.13	0	0.07	0.95	0.98	0.25	0.52	0.36	0	0.36	0.19	0.63	0.77	0	0.28	0.2	0.14
ADCY5	9.58	13.09	2.8	4.91	5.51	40.84	6.44	14.14	13.55	4.35	13.23	0.46	14.94	27.51	0.33	0	0.18	0.53	2.07	4.75	6.1	0.37	0.73	1.9
ADCY6	5.3	2.81	5.77	4.83	2.43	15.4	14.99	7.04	7	14.62	21.94	12.01	10.08	26.83	13.93	6.69	10.74	8.6	11.88	3.27	21.48	7.55	5.61	10.33
ADCY7	14.34	9.47	5.23	10.26	3.82	3.28	13.82	12.51	17.48	18.4	16.38	26.98	42.61	15.44	17.7	15.09	19.8	5.72	6.71	9.15	12.47	9.08	7.63	7.99
ADCY8	0	0	0	0.63	0	0	0	1.06	0	0	0.44	0	0	0	0	0	0	0	0	0.2	0.22	0	0	0
ADCY9	3.27	2.61	7.07	2.97	1.83	4.83	8.67	6.23	6.58	8.47	9.57	17.31	9.48	20.38	17.28	7.08	10.52	7.46	14.91	5.74	19.57	9.67	9.82	11.76
ADCYAP1	1.85	1.69	10.36	3.18	16.11	9.57	0.27	0.71	0.81	0.23	1.02	0.74	2.31	0.56	1.25	0.45	0.1	94.05	43.27	73.14	120.54	129.61	218.78	188.48
ADCYAP1R1	0	0	1.79	0.02	0	0	0	0	3.12	0	1.96	0.18	0	0.28	0.05	0	0	0	0	0	0.13	0.07	0	0
ADD1	54.55	46.41	58.41	51.66	68.33	56.83	65.61	60.4	77.6	63.76	89.8	95.16	117.87	105.35	81.71	55.98	55.69	48.12	58.04	70.54	106.65	74.86	74.13	92.79
ADD2	0	0.53	1.41	0.58	1.1	0.04	9.75	2.52	0.69	3.5	2.59	0.93	0	0.7	0	0.29	0.25	0.17	0.31	0.2	0	0	0	0.51
ADD3	36.28	39.57	55.26	31.86	45.99	37.45	50.16	60.99	113.04	56.33	56.6	22.53	28.18	19.78	25.73	19.38	18.99	13.57	16.59	12.27	33.22	12.4	20.69	24.87
ADGB	0.09	0.56	0.3	0.34	0.41	0.36	0	0	0	0	0	0.09	0.2	0.84	0	0	0.05	0	0.09	0.89	0.59	0	0	0.23
ADH1A	0	0	0	0	0	0	12.1	0	0	0.16	0	0.8	0.59	0.6	0	0	0	0	0	0	0	0	0.23	0
ADH1B	0.09	0.18	1.6	0	0	0	0	0.48	1.49	2.6	1.95	0	0.17	0	0.72	0.29	0.12	0	0.46	0.3	0	0.58	0.27	0
ADH4	0.54	2.39	1.63	1.34	0.73	0.9	0.66	0	0	0	0	0	0	0	0	0.37	0	0	0	0	0	0.25	0	0
ADH5	13.07	20.97	28.6	23.77	21.3	36.56	48.76	40.92	52.5	50.39	48.15	14.9	32.51	13.24	34.29	13.7	26.13	14.35	12.79	41.96	40.48	80.66	67.47	90.27
ADH6	0.11	1.77	2.52	0.5	0	0	13.18	14.63	3.35	13.47	10.17	1.21	0	0.73	0.88	0.29	0.56	0	0	1.21	0	0	0.42	0.8
ADH7	0	0	0	0	0	0	0	0	0	0	0	0.57	0	0	0	0	0	0	0	0	0	0	0	0
ADHFE1	1.34	3.19	3.18	0.47	0.11	0.88	2.9	2.19	4.14	5.24	1.12	4.08	6.07	5.42	11.71	5.64	6.04	9.39	11.65	6.83	16.57	9.41	7.1	8.85
ADI1	27.61	15.22	33.59	23.17	21.32	27	23.66	27.87	34.02	37.22	41.44	8.92	27.79	7.5	15.62	9.83	18.86	5.59	11.63	24.91	16.89	22.13	24.82	19.85
ADIG	0.19	0	0.9	0.21	0	0	0	0	0	0.66	0	0	0	0	0	0	0	0	0	0	0	0.66	0	0
ADIPOQ	1.93	1.99	3.76	2.71	2.85	1.3	0	0	0	0	0.18	0.51	0.66	0.78	0	3.29	0.47	0.07	0	0	0	0.1	0	0.32
ADIPOR2	3.85	6.72	13.22	22.56	18.1	14.87	23.7	20.54	9.94	25.97	21.43	13.67	11.75	19	13.67	5.71	13.29	8.53	10.55	11.93	33.45	14.25	16.59	16.4
ADIRF	0	0	0.88	0	0	0	0	0.73	0	0	0	4.41	0.69	1.38	0.49	0	0	0.51	1.84	0	3.87	0	0	0
ADK	7.24	7.02	7.35	6.86	10.77	14	11.26	18.47	18.33	21.66	29.64	16.48	30.59	16.23	31.58	20.16	25.63	5.36	7.59	16.6	31.66	21.1	30.25	30.79
ADM	0.1	17.05	1.29	4.69	1.86	24.52	5.44	0.75	0.36	0.34	7.45	12.82	18.88	6.22	8	6.6	17.1	20.76	19.05	16.18	15.45	50.71	67.53	82.12
ADM2	2.71	2.66	3.5	2.37	3.76	1.48	0.05	0	0	0.42	1.61	3.95	2.03	2.64	2.51	0.98	0.31	4.81	1.76	1.21	3.01	5.46	3.97	4.97
ADM5	2.27	4.64	8.46	3.12	8.78	3.14	1.84	1.52	18.68	7.38	7.76	8.72	6.4	13.98	3.37	1.89	1.63	1.73	3.95	4.14	3.49	0	0.82	0.47
ADNP	55.39	58.3	64.48	69.37	94.72	72.45	99.83	85.74	123.44	108.94	153.33	67.58	77.81	74.32	63.92	49.15	60.58	35.07	38.18	51.69	82.68	78.62	62.98	86.79
ADNP2	10.43	0.93	10.74	6.66	8.36	6.56	11.02	12.96	17.32	23.67	25.74	54.23	49.3	27.97	25.66	28.22	15.02	25.84	11.81	21.66	25.01	21.88	18.35	11.49
ADO	2.86	5.31	3.5	3.01	7.6	2.91	5.57	7.23	6.19	6.92	10.66	3.96	3.48	9.78	3.29	0.77	2.5	2.65	7.3	1.61	6.53	9.14	3.85	8.28
ADORA1	0	0	0	0	0	0	0.74	1.22	2.95	0	0	0.34	0	0	0	0.21	0	0	0	0	0.94	0	0.99	0
ADORA2A	0.51	11.18	1.66	3.64	1.5	0.29	0	0	15.05	2.64	0.05	12.34	9.82	28	14.25	12.28	14.08	0	0.78	3.08	0	1.44	3.48	1.54
ADORA2A-AS1	9.59	5.23	5.12	7.52	3.68	1.11	0.64	2.73	1.83	3.02	2.46	7.68	14.79	9.01	3.79	6.18	7.55	0.38	1.49	1.89	0.32	0.55	0.85	0
ADORA2B	0.37	4.73	1.24	1.39	1.36	3.43	0	0.73	6.91	0	0.87	1.26	3.95	0.95	1.65	1.55	1	0.71	0	1.62	0.87	2.32	0	3.95
ADORA3	0	0	0.15	0	0	0.14	0	0	0.23	0	0	0.28	0	0.4	0	0.34	0	0	0.52	0	0	0	0	0
ADPGK	14.99	17.69	16.48	20.6	37.09	18.29	14.76	12.38	27.87	15.97	20.11	36.63	26.13	31.83	26.99	15.78	17.97	25.72	35.46	28.22	42.15	32.47	32.93	49.28
ADPGK-AS1	0	1.52	0.75	1.2	0.13	4.29	0	0	0	0.58	0.36	1.97	0.88	1.22	0	0	0.52	1.1	1.83	0	0	0	0.31	0
ADPRH	0.05	0.93	0.22	0.21	1.95	0.21	0.64	1.41	0	2.6	3.87	2.94	2	3.84	2.44	3.33	3.64	1.31	1.09	1.16	2.75	3.11	6.35	6.34
ADPRHL1	0.91	1.5	0.25	1.51	0	4.23	4.87	1.07	0	2.35	0	3.22	1.64	3.97	7.34	1.36	1.35	2.31	4.46	3.46	2.2	2.85	2.21	4.88
ADPRHL2	33.4	14.35	17.42	15.37	7.61	17.74	11.33	20.77	10.82	26.11	20.02	7.76	28.82	19.12	28.37	9.09	20.55	10.04	6.36	58.09	7.8	30.84	32.38	34.41
ADPRM	0.09	0.45	4.25	3.4	0.26	0	0.43	14.64	7.26	6.35	1.14	1.97	4.85	2.44	3.83	0.69	1.67	4.74	3.25	2.75	5.78	9.2	4.35	13.94
ADRA1A	5.27	7.93	14.3	11.62	12.05	7.52	0	0.08	0	0	0	1.28	1.76	0.47	0.16	1.26	0.41	0.2	0	0.66	0.67	0	0	0
ADRA1B	0	0	1.87	0	0	0.91	0	0	0	0	0	0.53	0.19	0.4	0	0.97	0	0.73	1.58	2.02	1.45	0.64	1.68	0.22
ADRA1D	0	0	0	0	0	0	0	0	0	0.09	0	0	0	0	0	0	0	0	0	0	0	0	0	0
ADRA2A	61.14	67.41	52.29	47.05	42.97	73.74	9.16	7.06	3.57	4.91	8.57	1.07	0.45	1.15	0.08	0	0	6.2	24.25	24.04	26.55	12.98	12.94	28.28
ADRA2B	0.09	2.42	0.31	0	0	0	2.95	0	4.4	1.63	0.25	0.18	0	1.09	0	0	0	0	0	0.46	0	0.15	0	0
ADRA2C	0.58	0	0.26	0.24	0.29	0	0	0	0.8	0	0	0.3	0	0	0.32	0	0	0.17	0	0	0	0	0	0
ADRB1	0	0	0	0	0	0.05	0	0.11	0	0	0	3.1	8.63	3.42	17.42	8.33	12.96	0.12	0.21	0.13	0.57	0	0.6	0.34
ADRB2	38.71	73.86	3.8	11.3	18.46	1.86	1.7	0.75	6.62	0.84	0	2.91	5.77	3.07	2.73	1.07	11.38	1.14	4.67	1.86	5.22	3.32	1.86	10.18
ADRB3	0	0	0	0.52	0	0	0	0	1.17	0	0	0.9	0.16	0	0	0.14	0.35	0.12	0	0	0.31	0	0	0
ADRBK1	7.54	8.19	9.38	38.18	27.53	9.35	5.28	5.54	0.75	4.48	4.24	17.65	4.64	27.37	5.17	3.98	3.97	14.45	15.28	2.95	16.02	4.04	4.96	9.53
ADRBK2	13.46	23.25	23.72	13.35	8.03	35.34	40.24	41.43	35	42.1	34.48	49.18	29.84	37.33	43.85	28.33	59.64	24.83	31.14	49.98	67.66	36.54	30.71	52.89
ADRM1	21.72	16.38	16.5	27.7	17.3	47.4	23.85	31.98	26.47	31.72	59.53	50.98	60.18	128.84	46.04	29.46	41	50.21	63.75	32.57	54.75	38.69	33.04	47.06
ADSL	19.57	11.26	18.2	11.31	22.78	40.04	31.72	38.52	18.12	24.04	33.55	25.81	26.85	40.48	33.14	16.76	42.58	8.65	7.67	12.73	42.87	26.45	21.92	52.82
ADSS	19.53	7.1	8.51	18.39	34.31	8.78	9.27	9.54	17.97	10.88	16.1	7.44	7.01	4.81	8.08	3.82	12.33	7.24	4.9	8.96	25.21	19.9	17.73	24.56
ADSSL1	0	0	1.35	0	0	0.09	5.7	2.37	11.31	5.03	12.22	7.9	6.32	2.56	12.99	5.83	24.7	2.94	3.06	18.93	6.1	19.41	16.57	20.38
ADTRP	2.32	1.32	3.77	2.64	2.11	1.41	0	0.51	0	0	0	0	0.49	0	0.16	0	0	0.55	0.33	0	0.46	0.81	0.38	0.28
AEBP2	5.77	13.55	10.24	7.92	6.16	21.33	14.57	13.73	17.47	23.33	22.62	11.11	26.71	12.75	15.33	13.15	13.88	3.77	8.64	10.56	23.38	16.21	15.01	22.5
AEN	1.8	20.93	10.3	6.25	3.92	23.21	19.14	17.79	48.84	39.94	32.03	57.84	27.9	44.84	109.66	57.46	40.4	17.61	7.69	20.64	18.01	71.33	50.92	75.68
AES	86.35	104.04	157.07	78.02	96.36	195.48	155.22	114.56	117.13	136.32	106.83	307.53	116.99	243.37	103.22	70.82	95.13	237.8	169.05	92.51	180.53	125.77	159.52	201.83
AF007147	1.86	4.68	1.58	9.34	23.98	0.38	0.07	0.16	0	0.42	0.57	0.62	2.56	1.24	0.75	0.75	1.08	0.69	0.82	0.53	2.55	1.34	1.55	0.17
AF020763	3.7	0	3.85	1.51	3.02	1.14	1.12	0	0.3	2.09	0.93	0.35	0.5	2.61	0.35	1.05	0.36	0.76	3.78	2.17	4.68	0.55	6.91	7.35
AF035281	3.88	2.72	2.93	1.01	4.69	5.06	17.54	5.79	27.6	8.25	5.78	6.7	5.61	8.44	9.26	9.06	7.45	3.24	2.81	5.29	4.03	5.94	3.56	7.07
AF047486	0.27	1.58	1.63	1.19	0.64	0.19	0	0	0	0.33	0	0	1.65	0.92	2.89	0	0	0	0.61	0	0	0.5	0	0.1
AF055024	0	8.13	19.68	4.93	0	48.15	25.35	9.64	35.82	30.43	19.22	1.26	11.69	0	11.17	11.67	14.5	0.04	2.45	22.8	2.16	52.17	37.16	48.54
AF063596	18.8	29.39	12.6	4.84	43.19	22.34	5.7	0	33.21	0.5	15.32	16.62	4.63	12.62	4.8	5.42	9.45	27.21	20.63	6.72	8.4	0	3.22	5.61
AF070569	0.63	1.93	19.61	1.95	19.12	23.84	14.73	12.54	25.18	15.72	24.49	22.64	45.65	14.29	6.1	9.08	12.94	27.81	14.53	17.36	6.78	20.65	12.37	0.46
AF070581	55.38	38.86	32.95	21.38	24.31	67	95.8	60.33	71.11	115.92	95.08	169.59	83.68	159.98	57.01	99.01	94.2	35.45	41.53	84.05	98.73	47.86	51.62	34.26
AF072097	0.78	1.2	1.64	1.62	1.45	7.6	2.84	3.92	2.33	4.17	6.95	25.35	3.77	21.66	2.74	2.29	4.11	15.82	7.16	2.47	10.51	2.12	10.55	3
AF075036	0	0	0.48	0.44	0	0.61	0	0	0	0	1.5	1.95	0	0	0	3.4	0	0	4.22	0	0	1.65	0	2.04
AF075112	4.59	0	0.67	0	0	1.74	0	0	0	1.9	9.68	2.18	10.08	0	0	0	2.44	0	4.36	7.33	0	0	3.93	0
AF085962	0	0	0	0	0	0	0	0	0	0	0	0	0	0	0	0	0	0	0	0	0	0	0	0
AF085995	12.57	18.19	16.57	9.18	8.95	2.96	14.72	4.47	6.36	14.2	18.01	2.78	2.1	2.08	7.44	7.85	6.09	1.55	0	1.83	7.91	6.99	1.65	5.94
AF086102	0	0	0.27	0	0	0	0	0.25	0	3.99	0	2.86	0.71	1.43	2.01	8.27	1.03	0.53	1.91	2.48	8.02	0	0	2.41
AF086125	0	0	0	0	0	0	0	0	0	0	0	0	0	0	0	0	0	0	0	0	0	0	0	0
AF086126	1.2	5.48	7.14	1.45	1.02	1.88	2.36	1.21	1.53	0.83	0.74	1.85	1.97	1.97	0.53	3.23	1.06	0.3	2.65	0	2.82	0.23	3.2	5.89
AF086132	6.81	1.63	7.47	1.51	0.74	7.92	8.16	10.64	9.34	10.15	26.12	1.15	7.74	3.43	9.14	8.57	23.62	1.28	1.15	6	11.33	8.59	5.41	12.64
AF086154	0	0	0	0	0	0	0	0	0	0	0	0	1.46	0	0	0.61	0	0	0	0	0	0	0	0
AF086165	0	0.85	0	0	0.19	0	0	0.52	0.53	0	0	3.61	0	0	0	0	2.57	3.35	0	0	0	0	0	0
AF086184	1.86	0	2.6	0.71	3.16	0	0	8.44	0	0	4.91	0	0	0	0	3.24	3.28	0.49	0	0	0	0	0	2.2
AF086203	4.75	2.5	5.36	4.54	8.68	3.31	0	0	0	0	0	0	0	0	0	0	0	0	0	0	0	0	0	0
AF086219	0	0	1.97	0	12.68	2.63	0	0	0	0	0	0	0	0	0	0.87	0	0	0	0	0	0	0	0
AF086258	0.27	0	0	0.3	0	0.31	0	0	0	0	0	0	0	0	0	0	0	0	0	0	0	0	0	0
AF086285	0	0	9.62	1.14	0.4	1.15	0.23	1.61	0	0.26	0	0	3.66	5.56	1.62	4.18	2.63	2.75	4.33	1.59	4.29	3.04	2.16	11.9
AF086288	0	0	0.5	0	0	0	0	0	0	0	0	0	0	0	0	0	0	0	0	0	0	0	0	0
AF086294	0	0	2.11	0	0	0	0	0	0	0	0	0.93	0.69	0	0	0	0	0	0	0	0	0	0	0
AF086303	0	0	0	0	0	0	0	0	7.45	0	0	0	0	0	0	0	0	0	0	0	0	0	0	0
AF086346	0	1.94	0	0	0	0	3.5	0.76	0	7.74	8.1	0	6.3	0	2.95	3.17	7.21	0	0	5.96	0	11.25	22.05	13.61
AF086351	0.75	24.83	6.75	2.09	11.24	20.69	5.44	29.09	13.18	23.11	11.5	7.94	8.44	9.46	22.17	18.98	22.71	1.76	6.36	15.77	9.08	20.04	12.28	29.95
AF086476	0	4.84	0	0	0	0	0	0	0	1.26	0	2.83	2.22	8.36	1.56	0	1.62	0	5.66	0	4.2	2.45	0	2.49
AF088041	21.27	28.18	33.37	30.41	56.62	26.93	19.49	16.52	11.86	26.99	29.95	18.63	15.35	17.3	22.14	15.24	26.45	8.36	15.5	18.02	14.63	28.94	26.56	42.52
AF090102	0	0	0	0.96	4.07	0.93	0.14	0	0	0	0	1.13	0	1.75	1.72	3.4	0	0	0.55	3.08	0	11.09	0.73	0.78
AF090939	0.14	0	0.5	1.69	0	0	0.21	0.45	0	3.11	5.23	1.46	2.36	1.76	0.46	0.71	1.54	0.65	1.46	0.19	3.62	0.95	1.52	0.73
AF116693	0	0.65	4.27	2.6	0.75	0	3.7	0.67	3.4	3.72	0	0.46	0.82	0.56	0.4	0.24	0.21	0.54	0	3.79	5.17	0.63	1.33	2.82
AF131837	54	26.64	55.76	26.26	31.4	74.54	63.37	53.27	27.72	53.58	76.13	2.75	6.83	5.69	2.69	1.69	4.01	2.3	5.86	17.84	9.5	0	1.8	7.17
AF143870	1.42	1.31	0.58	0	11.1	0	0	0	0	0.64	1.79	0	1.43	0	0	0	0.79	0	0	0	0	0	0	0
AF143871	0	0	0	0.86	0	0	1.2	0	0	0	0	0	0	0	0	0	0	0	0	0	0	0	0	0
AF157115	1.34	0	0.84	1.06	2.43	1.91	0.18	1.84	4.31	0	2.04	1.07	1.99	2.98	0.51	0	0.54	2.21	5.69	1.1	3.06	0.8	0.73	0.82
AF161442	0	0	0	0	0	0	0	0	0	1.42	0	1.12	2.53	0	0	0	0	1.87	0	0.73	1.58	0	0.66	0
AF188711	5.7	17.08	6.44	37.22	20.92	4.22	0.13	4.41	0	14.69	0	16.35	0	7.68	0	0	2.84	0.01	3.55	0	0	13.32	0.99	0
AF198444	0.58	0.88	2.8	0.53	3.28	1.16	2.91	3.06	9.02	7.21	11.29	1.04	16.44	1.17	7.77	9.2	9.64	1.78	0.38	6.71	0.62	7.11	7.06	5.67
AF216583	0.51	0.2	0.2	0.19	0	2.3	0.8	1.13	1.92	2.39	13.12	11.51	2.14	6.48	1.52	12.45	1.16	3.61	9.37	4.19	6.03	4.74	10.52	10.28
AF258550	2.89	3.56	6.76	3.93	5.08	2.25	0	0.09	0	0.72	0	2.82	0.26	2.12	0	0.22	0.19	1.77	4.94	0.68	4.86	0	0	0
AF258560	0	0	3.02	2.35	0	2.08	4.31	4.31	16.63	4.82	5.97	3.68	17.47	2.29	1.65	7.45	4.13	2.01	1.88	5.2	2.07	4.27	4.13	1.85
AF268386	0	1.05	2.96	0.45	0.08	3.3	0.29	1.45	10.65	0.38	4.35	1.32	0.96	1.59	0.89	0.64	0.21	1.11	1.06	2.27	3.26	5.79	1.45	4.92
AF279775	1.7	4.35	1.77	2.21	2.93	2.79	0	0	0	0	0	0	0.52	0	0.45	0	0	0	0	0	0	0	0	0
AF279780	0.45	16.44	18.38	11.28	8.81	5.6	7.99	13.88	21.56	37.69	17.72	12.02	15.05	13.09	7.39	7.03	5.17	2.07	26.22	8.85	4.66	3.3	4.31	4.78
AF279782	2.17	4.33	4.08	1.83	1.27	3.08	0	0	0	0	2.45	1.06	0.52	0.53	0.55	0.22	0.37	0	0	0	0	0	0	0
AF289551	7.5	23.67	38.9	25.75	24.02	24.81	17.36	11.98	2.75	22.72	28.66	27.23	35.21	32.48	14.53	12.29	16.42	23.15	24.53	28.43	61.94	14.9	16.43	30.26
AF339801	0	0	0	0	0	2.58	0	0	0	0	2	0	0	0	1.48	1.74	3.79	0	1.39	0	6.58	0	0	0
AF339817	17.64	20.17	32.09	20.2	21.49	32.87	20.96	37.59	39.69	35.31	34.81	16.42	13.62	18.64	11.38	11.89	10.91	8.52	15.2	9.34	21.59	9.09	12.33	16.16
AF380582	0	0	0	0	0	0	0	0	0	0	0	0	0	0	0	0	0	0	0	0	0	0	0	0
AF397448	0	0	0	0	0	0	0	0	0	0	0	0	0	0	0	0	0	0	0	0	0	0	0	0
AF401214	7.8	14.64	38.05	22.23	8.5	28.07	11.56	16.85	15.75	19.42	24.79	0	69.94	17.53	42.54	8.26	25.65	6.12	19.11	38.45	2.79	25.73	7.3	11.39
AF420437	135.36	133.57	106.06	112.26	110.84	63.16	14.28	90.53	365.69	218.85	298.89	114.99	250.57	125.31	140.96	121.23	81.92	59.33	74.74	99.48	122.63	100.21	181.98	92.01
AF508906	0.98	0	0	0	0	0	0	0	0	0	0	0	0	0	0	0	0	0	0	0	0	0	0	0
AF508907	0	0	0	0	0	0	0	0	0	0	0	0	0	0	0	0	0	0	0	0	0	0	0	0
AF520419	0	0	0	0	0	0	0	0	0	0	0	0	0	0	0	0	0	0	0.91	0	0	0	0	0
AF520792	5.77	2.76	3.46	7.22	8.11	3.26	26.55	9.32	21.49	18.57	13.56	13.96	35.11	11.84	17.42	13.91	13.02	4.4	10.33	10.95	17.72	6.97	14.2	9.66
AF520793	9.24	2.58	4.78	1.37	0	3.79	0	7.26	0	3.3	9.28	6.48	7.81	5.81	6.22	9.72	4.24	0	6.49	2.55	9.19	2.17	1.53	2.21
AF532840	0	0	0	0	0	0	0	0	0	0	0	0	0	0	0	0	0	0	0	0	0	0	0	0
AFAP1	5.96	2.45	5.89	7.19	2.76	8.26	11	5.33	14	13.7	17.08	8.71	9.41	11.67	6.81	3.57	7.41	2.13	2.84	3.66	4.17	2.03	3.74	4.15
AFAP1-AS1	0.16	0.02	0.49	2.17	3.33	0.44	1.97	0.66	4.42	2.72	3.67	0.86	0.57	2.1	0.76	0.42	0.82	0.2	0.69	0.83	0.36	0.42	0.65	0.43
AFAP1L1	0.37	0.92	1.63	0.46	0.25	0.34	0	0.05	3.17	1.56	0.75	0.55	1.2	2.47	0.38	0	0.1	0	0.91	1.17	3.01	0	0.11	0.45
AFAP1L2	0.28	0.07	5.35	0	0.47	0	1.52	0.19	40.9	0	2.03	1.13	1.4	0.45	0.27	0.15	1.39	0.18	0.6	0.57	0.22	0.24	0.52	0
AFF1	89.81	152.61	59.86	106.58	247.5	146.48	55.17	63.4	29.54	63.86	78.24	79.33	108.03	82.63	60.69	45.49	63.68	74.97	74.09	108.96	129.5	141.16	126.69	170.1
AFF2	11.31	9.38	4.23	48.74	65.03	2.7	5.79	1.24	3.55	1.17	2.64	0.65	2.41	3.73	0.02	0.09	0.33	0.16	0.05	0.2	1.75	0.23	0.2	0.04
AFF3	1.1	2.97	3.05	1.43	4.78	1.05	0	3.24	8.51	0.99	0.95	1.39	0.16	0.53	0.15	0	0.18	0.04	0	0.67	0.1	0.76	0	0
AFF4	78.54	169.74	114.3	94.76	183.94	207.51	158.02	111.94	136.85	192.38	243.47	208.96	451.52	188.31	257.35	182.19	211.08	113.53	116.1	156.02	295.91	184.51	240.34	278.59
AFG3L1P	18.48	11.51	18.54	16.41	19.81	30.69	9.84	10.22	24.54	30.85	26.26	30.41	53.46	40.53	109.93	32.28	33.42	13.06	18.85	24.04	37.13	69.04	49.74	40.39
AFG3L2	5.83	4.48	8.41	7.86	5.77	3.99	12.88	24.01	26.61	16.7	22.92	25.4	53.46	23.85	36.65	26.63	29.82	12.34	11	25.86	34.11	37.96	26.95	39.37
AFM	0	0.76	0	0	0	0	0.33	0.08	0	0	0.41	0	0	0	0	0.18	0	0	0	0	0	0	0	0
AFMID	41.15	55.29	64.37	52.9	56.75	34.62	19.33	3.4	13.37	12.09	21.85	8.68	13.65	3.69	14.51	4.7	2.78	0.29	0.52	1.62	0	0.43	0.83	0.44
AFP	0	0	0	1.05	2.17	0	240.18	1.95	1.53	0.49	17.66	0	0	2.87	0	0	0	0	0.4	0	0	0	0	0
AFTPH	21.47	33.25	37.01	25.82	35.85	36.24	44.19	47.34	59.71	51.61	77.98	31.07	48.3	25.35	27.3	25.81	35.9	16.82	19.97	35.74	52.42	44.54	42.81	57.67
AGA	18.82	0.76	5.62	3.1	4.19	6.17	13.58	17.18	7.9	10.96	4.68	9.35	14.53	10.22	18.27	10.15	13.05	8.99	9.27	8.31	22.61	6.31	9.67	4.89
AGAP1	3	5.43	6.31	5.6	9.26	16.17	12.29	4.22	10.1	6.69	14.44	25.37	22.93	26.82	26.4	14.74	14.85	8.36	11.83	8.78	23.5	12.6	12.21	18
AGAP11	0.11	0.27	0.2	1.13	0.18	0.26	0.24	0.26	4.18	3.46	10.05	5.56	5	4.38	3.8	1.36	1.79	1.12	1.54	3.01	3.23	1.57	1.5	1.67
AGAP2	2.43	7.68	0.7	2.94	8.94	1.54	0	0.06	3.23	0	1.71	0.49	0.47	2.59	0.27	0.45	0.2	0.62	0.99	0.4	1	0.79	0.21	0.31
AGAP2-AS1	4.7	0	0.95	0	3.84	0.22	3.28	3.23	5.58	3.38	3.61	12.47	11.14	11.65	20.77	17.47	13.63	15.86	4.63	7.46	4.86	23.29	28.59	27.69
AGAP3	15.53	14.14	24.82	10.86	5.41	74.38	75.25	22.16	11.63	49.75	39.77	20.84	104.17	28.57	38.25	40.58	47.45	23.92	23.64	32.66	24.75	48.79	45.03	70.63
AGAP4	4.81	32.02	6.78	4.36	4.79	20.94	13.4	13.78	10.6	22.69	15.39	12.34	17.6	12.19	15.37	3.66	13.32	9.49	11.86	16.5	18.6	19.52	8.74	39.97
AGAP5	1.83	0.38	11.98	1.57	1.16	11.86	2.53	7.92	5.49	13.9	5.87	7.82	9.46	15.85	16.11	4.88	9.11	4.53	17.74	9.36	18.94	6.11	7.47	22.81
AGAP6	5.27	8.83	15.39	15.85	3.97	28.25	7.72	13.14	8.58	15.04	17.15	24.55	42.41	35.47	21.67	17.58	17.11	13.4	29.43	33.55	42.79	26.83	18.89	47.56
AGAP8	5.01	6.76	2.32	2.64	0	3.18	2.92	4.75	2.33	7.92	3.34	8.22	8.22	8.54	7.11	3.2	8.38	6.9	26.97	19.64	24.24	7.1	4.63	6.18
AGAP9	8.94	14.14	28.8	15.18	28.07	9.53	14.24	11.71	19.81	39.62	41.06	28.25	35.59	53.04	38.68	14.21	29.07	23.71	30.54	40.94	96.71	39.1	19.18	38.75
AGBL1	0	0	0	0	0	0	0	0	0	0	0	0	0	0	0	0	0	0	0	0	0	0	0	0
AGBL2	1.75	0.92	2.51	1.29	0.19	1.21	0.79	0.48	0.29	3.83	0.36	1.95	0.82	4	3.12	1.63	0.96	1.83	0.93	0.42	5.52	1.95	0.51	0.54
AGBL3	1.55	0.48	0.05	0	0.05	0.27	0.18	0.04	0	0.68	0.46	0.67	0.61	1.51	0.35	0.51	0.97	0.93	2.18	0.64	0.69	0.27	0.58	1.11
AGBL4	2.01	5.57	11.83	7.75	6.67	7.43	3.69	6.42	6.46	9.28	10.85	4.67	9.9	9.24	1.36	1.39	1.84	6.09	11.16	5.41	14.43	5.13	6.91	8.49
AGBL5	13.73	9.37	9.27	5.42	7.53	10.06	18.35	10.1	7.26	10.95	15.26	9.49	10.48	16.85	17.68	4.54	8.58	7.08	6.87	12.11	12.79	18.29	13.06	23.65
AGER	3.63	4.71	7.87	9.33	2.72	3.08	15.68	7.04	47.64	15.52	3.03	15.98	14.11	16.25	4.09	10.54	2.51	6.5	10.26	3.1	24.87	4.85	3.85	4.74
AGFG1	22.49	22.22	21.33	23.84	20.29	11.33	19.78	26.97	33.98	28.89	48.77	52.67	82.49	36.23	56.8	48.73	39.71	17.73	14.92	36.8	34.62	38	39.65	36.14
AGFG2	4.02	8.85	9.28	7.52	10.34	5.32	10.57	23.11	16.07	30.03	26.54	21.05	28.65	45.36	18.32	16.19	21.8	9.14	9.04	14.81	12.2	10.61	8.72	12.44
AGGF1	25.8	12.7	5.04	4.05	14.15	6.6	36.71	18.16	22.18	15.99	16.13	12.01	11.36	17.91	11.41	11	18.63	6.78	13.95	11.55	32.27	18.56	12.3	38.15
AGK	16.2	6.27	17.52	7.39	12.24	10.96	9.48	14.65	25.27	15.88	20.03	19.23	20.13	19.49	26.76	17.45	20.74	8.58	15.8	11.29	24.06	11.92	18.31	20.14
AGL	5.44	3.83	3.52	5.3	15.05	4.15	12.18	7.14	11.35	10.46	9.81	5.78	5.08	9.96	4.41	4.38	8.16	3.89	4.85	4.86	14.38	4.38	4.82	7.32
AGMAT	6.77	9.34	8.86	7.68	7.7	4.86	0.27	0	0	0.23	0.52	1.87	0.41	1.13	3.31	1.15	0.2	0.31	0.38	0.6	1.03	0.15	0.33	0.31
AGMO	0.4	1.39	1.71	0.63	1.18	1.72	0.17	0.8	0	0	0	0.72	0	0	0	0	0	0.27	0.24	0	0.99	0	0.14	0
AGO1	20.95	16.44	29.35	27.23	44.7	30.57	12.38	18.63	16.01	25.93	39.65	14.88	12.6	32.21	12.16	8.63	15.27	17.04	20.12	10.83	37.4	18.16	20.18	30.62
AGO2	24.33	17.37	23.17	16.79	24.2	32.6	34.97	38.62	47.5	31.52	34.61	43.03	61.68	37.13	34.02	41.33	31.77	17.19	20.4	28.44	30.35	39.63	46.79	52.76
AGO3	20.87	40.26	40.39	35.51	36.94	38.49	39.84	34.52	58.8	58.61	70.26	25.65	37.64	42.45	22.75	17.91	26.76	11.16	25.51	23.92	49.86	20.33	21.85	35.64
AGO4	9.75	10.06	4.88	7.64	7.42	8.03	9.44	9.91	13.47	8.6	8.09	6.4	7.68	3.26	6.64	5.62	7.24	2.79	4.67	4.33	12.65	6.68	7.1	12.05
AGPAT1	83.58	89.06	106.75	125.72	173.43	225.73	112.79	69.48	123.9	75.39	70.36	66.56	64.68	44.64	52.53	42.05	48.56	30.64	20.03	33.54	38.74	51.31	48.47	69.84
AGPAT2	40.97	55.7	18.96	27.02	85.8	72.11	12.97	36.5	6.78	17.84	13.91	23.57	12.8	30.8	13.32	8.53	8.19	49.1	26.71	14.88	24.04	19.26	25.59	12.89
AGPAT3	1.5	4.28	2.51	4.14	2.68	9.75	7.17	8.87	16.06	15.84	9.33	13.6	12.93	23.08	15.67	9.37	15.29	10.02	13.48	9.23	16.52	15.1	18.17	18.75
AGPAT4	12.3	13.49	35.57	11.97	14.85	13.86	13.99	14.63	20.84	19.59	21.31	12.71	25.97	21.69	6.19	6.72	8.42	7.88	9.67	11.45	20.22	9.33	3.8	3.09
AGPAT4-IT1	0.93	3.25	6.92	3.28	7.07	2.33	10.56	7.55	0.84	3.7	6.67	7.4	20.34	4.36	6.04	5.13	1.53	2.51	3.55	3.29	4	0.79	3.17	1.07
AGPAT5	4.08	4.85	6.01	2.9	4.39	7.03	6.63	11.8	10.99	11.99	17.08	4.15	4.75	5.62	4.31	5.61	3.8	4.58	3.09	3.75	11.4	11.93	10.64	8.3
AGPAT6	13.73	18.35	17.41	18.07	16.28	26.54	11.21	10.36	10.09	12.82	14.03	14.7	25.16	21.47	20.96	17.25	17.69	18.14	21.17	22.55	34.47	39.41	40.21	47.11
AGPHD1	0.51	12.27	0.38	0.39	0	0.13	5.86	0.56	2.58	1.81	0	3.17	0.53	3.24	1.79	0	1.3	1.96	4.32	3.26	5.02	1.2	4.3	5.1
AGPS	6.66	5.72	3.89	9.24	10.46	6.17	14.97	10.06	7.89	13.59	8.42	8.42	5.59	9	4.21	6.49	6.7	2.22	2.84	4.86	11.46	8.25	5.74	9.21
AGR2	0.38	2.72	1.33	1.47	2.18	0.14	0.45	2.57	5.39	8.7	4.31	0.62	1.77	0.93	0	0	0	0.34	2.39	1.59	1.72	6.45	1.8	0
AGR3	0	1.86	0.23	0	0	0	0	1.29	0	0	2.3	0	0	0	0	0	0	0.46	0	0	0	0	0	0
AGRN	6.86	7.77	10.93	7.72	5.24	11.51	2.78	2.52	7.77	2.74	6.8	10.65	3.69	13.53	3.24	1.81	1.18	3.58	4.66	2.24	1.54	0.71	1.85	1.06
AGRP	0	0	0	0	0	0	0	0	0	0	0	0.8	0	0	0	0.5	0	0	0	0	0	0	0	0
AGT	2.03	0.07	1.14	0.56	2.98	0.06	14.4	0.06	0.21	0.1	1.31	40.39	11.14	41.48	39.53	42.23	19.15	12.55	2.99	1.52	1.96	10.82	17.73	4.73
AGTPBP1	12.89	22.45	20.66	23.62	26.5	25.75	17.44	15.57	39.69	23.88	31.71	16.54	17.98	10.15	9.09	8.68	12.38	12.38	14.26	25.87	31.64	21.93	23.7	27.15
AGTR1	0	2.86	7.46	0	0	0	3.5	0.73	11.86	0.46	9.36	0	0.38	0	0	0	0	0	0.26	0	0	0	0	0
AGTR2	0	0	0.23	0	0	0	0	0.58	0.71	0	0.56	0	0	0.31	0	0	0	0	0	0	0	0	0	0
AGTRAP	10.36	7.16	15.01	16.26	25.85	8.83	7.47	15.07	7.64	15.5	12.68	14.16	7.9	10.72	19.44	9.54	19.1	11.7	4.59	6.22	6.51	10.98	19.35	14.48
AGXT	0	0	0.68	0	0	0	1.55	0.12	0	0.59	0	0.48	3.54	0	5.27	0.59	0	0	0.96	1.85	0	0.39	0.28	0.8
AGXT2	0	0	0	0	0	0	0.12	0	0	0	0	0	1.06	0.71	0.51	0.2	0	0	0	0	0	0	0	0
AGXT2L1	0	0	0	0	0	0	0.11	0	0	0.12	0	0	0.22	0	0.31	0	0	0	0	0	0	0	0.52	0.5
AGXT2L2	26.84	24.68	29.43	15.15	15.07	8.11	20.97	11.59	24.71	23.46	18.33	23.73	25.05	26.94	20.23	10.32	17.98	13.15	16.15	9.99	21	11.68	19.1	35.58
AHCTF1	13.02	28.91	21.9	18.64	26.36	37.26	44.42	34.02	44.01	41.97	61.5	34.52	39.73	35.44	20.2	17.41	27.1	24.78	29.9	23.34	69.78	32.66	36.06	45.81
AHCY	19.08	17.16	27.7	21.66	44.86	18.68	24.91	33.31	34.72	33.86	57.89	24.39	17.38	37.28	40.92	12.35	22.42	15.9	10.47	12.52	20.9	34.85	22.3	39.16
AHCYL1	44.04	54.9	86.19	34.65	51.58	75.84	117.89	109.63	145.66	132.44	167.09	65.45	89.85	48.71	137.22	91.55	138.45	58.42	37.56	116.34	99.24	163.74	196.78	195.59
AHCYL2	12.33	13.98	17.95	17.13	28.48	25.44	34.19	23.7	18.26	28.87	31.98	15.44	12.32	13.88	14.52	11.01	18.54	10.51	10.01	13.6	23.96	19.51	25.01	31.02
AHDC1	4.91	20.21	15.82	16.78	8.78	31.58	9.87	12.09	10.03	16.56	16.47	42.11	13.91	47.28	9.77	9.53	10.01	24.57	30.51	7.3	16.37	12.39	15.03	22.9
AHI1	24.13	35.52	42.01	20.96	20.56	42.61	51.62	29.59	42	76.75	84.26	86.47	95.99	91.08	50.34	54.59	66.78	36.13	68.69	62.4	155.7	76.45	62.99	93.96
AHNAK	2.76	6.53	21.16	3.87	10.95	2.5	7.52	12.42	41.16	6.78	30.14	27.14	29.1	6.94	10.6	3.75	5.74	5.3	4.61	8.01	6.9	4.33	2.22	2.06
AHNAK2	0.02	3.27	0.34	0.45	0.08	0.41	1.25	0.75	4.18	2.81	0.75	3.12	2.89	3.11	1.88	2.83	1.72	1.44	1.45	1.53	3.82	1.4	4.07	3.99
AHR	13.14	14.15	17.04	12.9	14.89	10.48	11.97	7	17.2	9.04	17.26	1.88	10.24	1.13	18.1	1.03	12.84	8.4	10.55	15.01	24.37	36.15	20.8	23.05
AHRR	3.82	13.83	3.1	12.26	2.77	5.44	0	0	0	0.14	1.82	1.66	1.04	0.96	12.96	1.94	5.2	4.75	18.27	0.28	4.09	0.81	1.62	0.18
AHSA1	39.97	43.96	56.72	37.3	31.15	80.31	59.04	74.71	55.14	87.18	71.9	25.13	153.85	32.2	90.47	48.16	74.99	13.35	10.48	108.01	66.4	115.26	97.37	185.57
AHSA2	7.44	23.51	27.52	19.22	4.49	16.9	17.41	33.65	41.61	28.87	27.14	16.77	36.65	19.1	24.9	22.22	31.33	19.74	15.05	31.96	50.69	44.49	45.18	76.24
AHSG	0	0	0	3.34	0	0.2	107.29	4.62	0	0.31	0	0	2.24	1.81	0	1.11	0	0	0.6	0.73	0	0	0	0
AHSP	0	1.77	0.71	9.19	0	0	93.99	14.56	2.26	3.68	21.34	0	3.74	1.86	0	0	0	0	0	0.82	0	0	2.2	3.17
AICDA	4.05	2.62	2.96	2.11	1.44	1.9	0	0.07	0	0	0	0.77	0	0	0.4	0	0.2	0	0	0	0	0	0	0.85
AIDA	11.46	8.59	23.78	14.33	10.95	27.52	41.25	33.58	38.17	42.87	43.55	20.49	32.43	20.97	27.2	16.46	31.7	13.28	19.75	27.35	42.07	43.67	38.47	54.7
AIF1	178.8	84.3	90.07	242.4	242.22	68.46	138.21	30.36	169.56	63.54	119.04	3.35	4.21	0	12.5	0.78	2.04	0	0	2.46	0	0	1.71	0
AIF1L	0	0.15	0.65	0	1.13	0	3.68	0.85	0.31	0.14	2.89	0.18	0.64	0	0	0.11	0.46	0	0	0.11	0.24	0.14	0.1	0.15
AIFM1	12.31	30.41	24.81	20.31	23.73	46.68	24.75	29.25	15.73	31.28	31.02	15.7	19.58	25.1	63.12	37.45	53.7	11.41	9.19	20.42	27.75	53.1	49.51	48.12
AIFM2	15.34	6.39	7.16	2.47	2.78	1.95	11.13	3.6	1.58	6.25	7.88	12.42	18.77	16.32	16.61	12.62	16.87	3.47	7.56	5.21	9.74	28.29	17.72	25.75
AIFM3	0.06	0.85	0.37	0.54	0	0.48	0.94	0.46	0	1.48	1.07	1.03	4.73	1.94	3.76	2.61	1.09	1.44	0	1.15	1.07	0.42	0.88	0.43
AIG1	33.69	50.64	29.84	56.61	45.77	139.82	65.48	60.05	90.76	66.76	94.65	53.04	63.95	45.14	83.86	71.12	108.11	28.7	44.9	65.55	83.08	103.5	121.61	141.91
AIM1	1.6	10.17	2.36	4.86	10.3	1.2	0.93	2.5	0.83	2.28	1.91	2.21	3.22	1.77	3.2	0.58	2.78	0.41	0.52	1.31	1.92	0.36	0.68	0.91
AIM1L	0.13	0.16	0.25	0.06	0.25	0	0.04	0.09	0	0.05	0.31	0.78	0.54	0.51	0	0.21	0	0	0.11	0	0.15	0.09	0.19	0.09
AIM2	0.48	3.56	4.12	4.37	0.26	1.4	0	0	0.35	0	0	0	0	0	0	0	0	0	0	0	0	0	0	0
AIMP1	14.19	14.94	12.44	6.03	11.84	8.06	11.69	13.22	11.26	23.17	10.37	19.02	22.39	22.28	17.26	14.05	14.91	9.61	11.76	19.19	43.98	31.17	31.01	40.2
AIMP2	8.88	6.72	10.58	7.72	3.91	9.08	12.65	8.03	13.79	14.22	7.2	20.31	15.2	36.6	23.56	10.27	18.8	8.44	6.03	7.55	9.91	34.82	14.98	22.54
AIP	38.18	32.47	62.56	24.22	35.65	17.26	34.89	49.75	18.92	40.7	34.61	14.64	28.1	22.74	31.69	23.7	24.65	17.69	8.31	15.69	22.33	41.58	57.96	61.2
AIPL1	3.25	6	8.33	4.93	4.34	3.21	0	0	0.19	0	0	2.29	1.15	0	1.74	0	0.29	0.6	0.28	0.14	0	0	0	2
AJ004954	0.82	0	0	0	0	0	0	0	0	0.64	0	0	0	0	0	0	0	0	0	0	0	0	0	0
AJ011378	0	0	0	0	0	0	0	0	0	0	0	0	0	0	0	0	0	0	1.2	0	0	0	0	0
AJ011981	1.72	1.06	0.7	1.65	3.19	1.2	0	0.28	67.47	2.37	2.86	0	7.16	1.51	0	0	1.63	0	1.14	0	2.83	0	0	2.93
AJ276246	0	0	0	0	0	0	0	0	0	0.74	0	0	0	0	0	0	0	0	1.73	0	2.48	0	0	0
AJ297365	0	0	0	0	0	0	0	0	12.24	0	0	0	0	0	0	0	0	0	0	0	4.55	0	0	0
AJ420422	0.49	0.51	3.77	8.35	4.25	3.04	10.8	7.7	15.8	27.39	21.66	0	21.86	8.52	28.31	19.77	30.07	4.98	0	24.23	0	32.01	29.81	40.32
AJ420489	0	0	0	0	0	0.53	0	0.17	7.41	0	0.8	0	0	0	0	0	0	0	0	0	0	0	0	0
AJ420595	0	0.65	0.97	0.75	0	0	0.63	3.39	0	3.76	3.96	2.84	1.26	2.56	1.19	2.79	2.12	0.63	5.68	2.19	11.82	1.4	0.99	3.8
AJ515158	0	0	0	0	0	0	0	7.29	0	0	9.04	0	0	0	2.86	0	2.05	0	0	6.22	0	4.79	0.95	1.05
AJ606316	1.04	0.13	0.38	1.05	0.29	0.76	2.22	0	3.24	1.7	0.3	1.31	0.48	0	2.27	0.67	1.27	0.5	0.66	0.14	0.9	0.18	0.13	1.27
AJ606328	0.31	0.56	0.4	0.33	0.56	0.14	0	0	0	0	0	0	0	0	0	0	0	0	0	0	0	0	0	0
AJ606330	0.11	0.2	0.73	0.71	0	0.21	0	0	0	0	0	0	0	0	0.2	0	0	0	0.38	0	0	0	0.22	0
AJ606331	0	0.2	0	0.06	0	0	0	0	0	0	0	0.24	0	0	0	0	0	0.13	0.48	0	0.33	0	0.55	0.4
AJAP1	0	0.17	0	0	0	0	1.76	1.14	1.23	2.23	0	2.01	1.11	1.22	0.47	2.72	0.85	0.32	0	0	0	0	0	0
AJUBA	0.04	0	1.2	0.06	1.82	0.23	2.36	0	0.79	0	1.74	0.18	0	0.55	0.19	0.11	0	0.3	0.18	0.46	0.5	0	0.21	0
AK000154	17.62	14.21	25.23	17.41	11.66	40.7	28.46	41.9	37.35	39.96	47.06	17.66	26.32	20.44	41.54	29.87	30.68	7.48	12.7	24.13	19.92	50.25	33.92	48.71
AK000451	5.1	0	13.35	0.75	0	0	2.33	0.47	0	1.34	0.82	3.38	0	4.93	1.11	5.8	0.31	1.64	3.03	0.38	8.93	0	2	0.99
AK000470	2.15	9.04	1.51	1.09	3.27	15.14	2.37	8.4	0.24	0.56	22.88	1.9	4.59	25.79	10.34	7.15	32.45	0.3	7.36	1.74	25.86	9.97	11.82	45.01
AK000798	0.33	0	5.47	0.8	0	1.55	2.19	0.18	1.62	2.38	6.4	6.04	6.64	5.95	8.46	7.39	3.92	0.65	2.56	0.89	5.12	2.27	2.69	1.35
AK000807	0	0	0	0	0	0	2.16	2.29	31.33	4.25	8.21	0	3.23	2.13	0.76	0	5.46	0	0	1.88	0	0	0	0
AK000840	2.97	3.33	6.76	3.28	6.28	1.47	0	0	0	0	0	0.31	0.23	0	0.65	0	0	0	0	0	0	0	0	0
AK000953	5.51	6.93	9.68	1.34	3.82	2.02	0	8.29	1.43	3.58	2.26	2.16	2.4	4.06	1.42	0.67	3.17	1.81	1.63	3.48	1.5	1.33	1.89	3.62
AK001057	0.04	0.39	0.77	1.93	4.99	1.45	0	0.12	32.03	1.13	0	22.29	10.33	12.31	12.62	2.52	7.01	5.08	10.03	2.63	7.56	2.23	3.18	4.56
AK001351	0.23	0.37	0.28	0.09	0.1	0.17	0	0	0	0	0	1.62	0	1.3	1.18	0	1.03	0.72	0.44	0.62	0	0	0.19	0
AK001394	5.64	0.99	2.18	1.22	0.22	3.04	4.35	6.72	10.54	10.65	7.47	5.72	5.92	2.94	4.27	2.3	2.79	2.34	5.73	6.31	15.9	3.29	3.71	2.43
AK001533	0.63	2.38	7.37	4.63	9.01	3.59	0.7	3.8	4.53	8.33	1.69	50.55	35.08	23.41	12.18	16.74	4.99	19	9.77	22.1	7.7	5.67	3.98	5.19
AK001558	0	0	0	0	0	0	0	0	0	0	0	0	0	0	0	0	0	0	0	0	0	0	0	0
AK001582	0.16	0.05	0.14	0.52	0.35	0.13	0	0.21	0	0	0	0.16	0	0.74	0	0.2	0.17	6.6	6.58	1.78	5.87	2.94	4.37	9.27
AK001928	8.04	0.77	2.88	2.14	0.44	1.08	0	3.35	0	0.28	0.95	0	2.01	1.01	0	0	0.72	0.75	2.71	0	0	0	1.58	0
AK001975	21.85	2.49	1.37	1.18	0	14.17	10.75	12.73	0	4.34	10.25	1.11	6.18	0	0.69	4.53	6.75	0	0	2.24	0	0.66	0.94	3.95
AK002090	0.2	0	0	0	0.14	0	0	0	0	0	0	0.85	0	1.28	1.11	0.26	0.23	0.24	0.43	0	3.53	0.35	0.25	1.77
AK021537	0.15	0.01	2.73	0.63	0.9	0.71	1.34	0	12.34	0	2.34	0.06	0	0	0	0	0	0	0	0.28	0	0	0	0
AK021551	3.39	1.56	5.72	0	0	0.39	0.79	9.79	18.31	5.27	4.45	0	0.58	1.17	0	0.62	1.29	0	1.72	1.6	0.54	0.32	1.06	4.66
AK021563	0	0	13.39	3.26	0	0	0.61	0	0.65	0	1.03	0.73	1.16	2.29	0.8	0	0	0.43	0	0	1.11	0	0.88	0
AK021570	2.34	4.09	4.14	4.15	2.52	3.19	0.54	6.58	2.15	4.43	4.41	1.72	5.41	5.56	2.69	4.21	5.32	2.2	3.94	11.63	5.76	18.03	20.95	11.04
AK021664	4.28	1.53	2.91	0.82	1.55	1.59	5.64	4.06	11.85	9.99	9.93	7.48	27.65	7.09	11.83	22.2	11.7	6.65	4.44	29.74	18.32	21.67	14.77	8.76
AK021739	5.17	6.05	5.22	4.5	2.88	1.89	0.42	0	0	0.71	2.03	1.02	2.05	4.64	0.45	0.21	2.52	0.76	0.77	0.22	3.24	0.32	0.19	0.6
AK021804	0.23	2.68	0.75	0.06	1.79	0	0	0.56	5.9	0.1	0.67	0	0.53	4	0.38	0.15	0.13	2.43	10.16	4.32	15.63	3.34	0.84	4.82
AK021876	4.48	13.21	8.08	5.82	7.44	2.2	0.64	0.16	0.05	1.05	1.33	8.98	5.68	6.76	1.43	5.94	2.04	2.33	3.21	3.28	3.98	0.79	0.94	0.27
AK021888	3.12	3.61	6.02	3.7	1.83	3.73	20.75	11.48	2.48	12	13.26	9.41	8.34	13.19	5.35	4.15	6.46	4.15	13.16	5.59	22.6	5.52	6.21	8
AK021977	0.82	1.39	4.3	2.58	8.55	2.11	0.67	0.56	5.93	1.05	2.98	0.54	0.51	0.7	0.12	0	0.33	0.69	1.64	1.29	2.13	0.06	0.9	0.39
AK022030	8.79	13.96	12.61	8.68	14.54	8.62	21.69	21.2	20.06	22.24	32.11	10.31	22.28	5.92	35.27	19.29	24.39	3.53	8.36	30.53	15.97	49.54	37.75	40.2
AK022382	1.39	1.33	3.36	4.78	2.95	1.96	2.6	2.43	4.49	8.3	4.66	3.98	12.1	2.57	4.49	8.42	4.06	3.97	6.84	6.76	13.73	13.45	9.15	4.29
AK022787	17.7	11.5	6.48	2.31	0.75	4.14	81.25	26.11	75.96	30.54	48.75	0	16.76	0	3.17	9.02	8.51	0	0	2.98	0	12.12	35.1	4.13
AK022793	1.02	0.83	1.81	1.59	3.6	0.22	0	0	11.61	0.12	0	0	0.42	0	0	0.17	0	1.71	1.1	0	0	0.46	0	0.24
AK022914	0	0.2	0	0.26	0.13	0.09	0	0	0	0	0	2.98	0.54	0.28	1.99	3.39	1.99	0	0.47	0.16	0.16	0	1.4	1.65
AK022915	22.76	17.88	25.16	13.67	13.22	22.34	46.62	27.82	40.81	43.62	52.28	18.77	33.75	7.58	27.01	44.32	14.56	6.36	7.73	24.67	12.44	23.3	45.96	13.49
AK022993	8.77	3.28	7.49	5.02	4.96	1.96	0.22	1.69	3.81	2.38	6.51	0	1.76	1.15	0.2	0.51	2.15	0.77	1.14	0.43	5.28	1.15	1.61	1.64
AK022997	7.3	5.36	2.72	10.82	7.35	2.83	9.61	7.07	6.97	14.82	13.18	1.57	2.81	2.36	1.45	0.32	1.65	0.39	0.17	0.44	1.2	2.55	3.13	2.03
AK023033	0	0	0	0	0	0	0	0	0	0	0	0	1.28	1.28	0	0	0	0	0	0	0	0	0	0
AK023040	2.61	4.13	5.68	8.35	7.79	1.37	8.71	4.66	13.56	4.51	8.92	13.56	13.05	10.21	5.56	7.71	3.24	8.65	11	7.23	21.84	3.42	6.37	7.26
AK023159	1.61	5.65	4.31	2.49	4.31	2.27	0.13	1.4	3.48	2.74	2.05	0.69	1.16	1.65	1.52	0.09	0.32	1.22	1.08	0.85	1.76	0.35	0.71	1.49
AK023178	5.08	11.69	2.16	10.02	6.89	2.03	6.1	22.33	0	7.3	3.73	5.55	4.96	7.17	2.16	1.7	2.9	4.68	4.96	5.33	4.2	6.94	8.93	14.43
AK023304	0	3.54	0.6	0	0.9	0	2.03	0.39	0	0.19	2.91	4.15	2.04	3.19	0	0.28	0.74	5.82	8.97	0.89	8.31	0.76	2.24	1.16
AK023417	16.01	17.36	29.43	20.01	24.51	17.76	0	0	0	0	0	0.2	0	0.31	0	0.12	0.43	0.33	0	0.39	0	0	0.12	0.17
AK023457	18	4.63	4.19	3.06	0.83	4.76	5.82	4.36	1.67	11.05	11.85	2.87	8.93	2.16	3.61	2.34	2.39	0.27	0.72	2.29	0.99	4.47	2.08	3.38
AK023507	0	0	0	0	0	0	0	0	0	0	0.92	0	0	0.5	0	0	0	0	0	0.43	0.46	0	0	0
AK023515	10.25	11.77	15.06	9.84	14.23	6.52	0	0	0	0	0	0	0.65	0	0	0	0	0.33	0.29	0.19	1.21	0.46	0	0
AK023548	0.8	0	0	0	0	0	0	0	0	0	0	0	0	0	0	0	0	0	0	0.11	0	0	0	0
AK023566	5.41	2.93	4.63	3.91	2.05	2.8	2.58	6.9	0	6.13	9.82	4.56	2.27	2.98	6.21	4.1	2.14	3.46	5.12	3.8	5.87	2.5	2.66	4.15
AK023614	4.82	2.37	4.06	2.27	3.96	1.28	0	0	0	0	0	0.74	0	0	0	0	0	0	0	0.24	0	0	0	0
AK023627	0.61	2.12	0.57	0	0.37	1.14	0.21	1.48	1	1.76	3.17	4.83	6.11	3.02	7.03	1.58	1.97	1.92	4.48	2.93	2.37	5.61	4.49	6.45
AK023809	0	0.04	0.08	0.07	0.2	0.08	0	0	0	0	1.09	0.4	0.78	0	0	0	0	0.15	0	0.58	0.18	0	0.08	0
AK024092	2.92	5.97	4.75	4.33	11.62	3.44	10.94	10.48	4.77	20.5	18.71	19.69	18.76	14.38	14.3	13.63	18.44	7.29	14.9	17.46	39.82	20.23	22.95	13.82
AK024119	0	0	0	0	0	0	0	0	0	0	0	1.22	3.8	1.37	0	0	0	0.17	0.91	0	0.84	0	0	0
AK024134	5	9.27	6.2	5.6	6.14	4.69	0	4.68	0.62	1.09	1.01	1.21	4.11	2.93	7.23	3.25	3.69	0.55	4.54	3.27	9.52	8.08	3.52	3.79
AK024141	0	0.04	0.16	0.42	2.9	0.54	0	0	0	0.12	1.59	0.87	0.85	1.31	0.23	0.18	0.31	0.16	0	0.55	1.39	0.12	0.08	0.36
AK024242	1.44	0	0.07	0.24	0.13	0	0	2.76	0	0.17	0.58	4.21	0.15	1.27	1.75	0.26	0.33	0.24	2.53	0	2.9	0.17	0	0.52
AK024243	0.47	0.7	0.3	0.41	0.27	0.14	2.13	0	0	0	0	0	0.17	0	0	0	0	0	0	0.76	0	0	0	0.33
AK024248	46.71	37.79	38.78	46.4	47.24	25.06	12.4	23.76	39.18	27.57	25.26	62.55	44.61	29.76	30.29	36.78	12.15	33.59	38.66	28.65	24.55	28.44	27.9	20.64
AK024535	0.29	0	0	0	0	0	8.87	4.42	25.69	7.15	0	0	12.34	0	23.66	26.94	12.38	0	0	13.36	0	28.14	21.38	17.78
AK024736	1.92	4.07	1.82	1.23	5.86	1.5	2.74	15.32	5.89	5.36	1.64	6.71	2.58	8.91	4.13	1.94	2.3	7.05	3.56	2.28	10.92	3.55	7.8	8.57
AK024936	0.07	0	0.17	0	0.1	0	0	0	0	0	1.27	1.84	0.23	2.31	0.96	0.94	1.14	0.34	0.61	0	1.69	2	0.53	0
AK024998	0	0	0	0	0	0	0	0.18	0	0	0.32	0.94	0.17	0.71	0	0	0.5	0	0.24	0	0	0	0	0
AK025061	0	0.39	0	0.07	0.26	0	4.67	0	0	0.22	0	0.27	0	0.41	0	0.33	1.58	0.3	0.55	0	1.13	0	0.79	0.23
AK025117	2.85	5.79	5.02	8.49	2.82	7.69	2.9	8.2	17.22	11.59	16.74	19.4	26.61	14.04	21.66	14.64	12.72	6.9	13.15	17.71	12.3	15.47	17.17	10.42
AK025127	0	0	0	0	0.12	0	0	0	0.32	0	0	0	0	1.24	0.27	0.95	0.37	0	0.95	0	3.14	0.32	0.89	0.41
AK025140	11.03	7.18	20.71	10.42	6.47	5.24	8.24	20.36	18.43	25.76	19.65	14.25	25.95	9.96	33.53	28.02	25.38	6.96	11.98	19.83	16.48	60.53	32	44.86
AK025288	3.82	2.07	10.56	6.16	11.85	5.46	17.33	7.86	54.42	34.05	53.59	3.21	28.69	3.22	5.57	7.71	12.52	0.72	2.14	9.96	6.77	6.61	7.56	9.42
AK025321	0	0	0.62	0	0	0	0.26	0	0	0	1	1.09	0.8	2.18	0.19	0	0	0.2	0.36	0.23	2	0.3	0.21	1.21
AK025511	28.31	0	0	19.28	13.89	0.01	1	0.78	0	0	1.18	0.27	0	10.84	0	0.17	1.65	3	16.75	2.88	0	0	0	0
AK025664	2.89	1.55	1.79	0.65	0.4	0	1.19	6.83	32.39	3.77	7.14	8.05	3.05	5.18	3.55	5.15	2	0.28	3.87	4.7	3.88	7.97	1.15	2.15
AK025726	2.55	3.99	8.27	8.14	7.44	8.92	6.56	7.92	15.19	8.09	20.58	4.53	5.37	8.23	5.11	2.48	6.16	5.32	6.88	5.87	16.08	8.24	8.3	8.93
AK025793	0.6	0.43	0.19	0.44	1.89	0	1.34	1.64	1.46	0.55	3.7	1.85	3.45	4.81	1.31	1.23	1.24	1.41	2.19	0.96	4.39	0.82	1.26	1.53
AK025975	1.57	2.97	0.99	1.49	4.74	0.88	8.7	3.1	0.72	5.21	5.23	1.16	2.67	1.5	0.34	0.2	0.7	0.09	0.17	0.53	0.23	0	0	0.14
AK026244	0.23	2.51	13.62	4.66	0	10.69	17.18	26.64	7.94	34.15	22.22	3.92	14.66	4.4	14.54	4.87	12.17	4.37	1.96	9.58	9.65	6.5	5.19	14.09
AK026392	0	0	0.27	0	0.96	0	0	0	0	0.17	0	0	0	0	0	0.38	0	0	0.69	0	0	0	0	0
AK026512	0.58	0	6.22	0.97	0.39	0	2.69	1.94	2.16	1.29	3.59	0	4.06	0	1.92	2.26	1.3	0.34	0	0.39	0.85	0.5	1.78	3.07
AK026714	8.74	9.62	7.59	7.63	15.55	1.69	3.92	6.62	4.16	5.2	15.76	0.95	4.19	0.95	0.33	0.39	2.62	6.54	5.81	13.78	13.55	12.14	28.12	16.88
AK026736	0	0	0.24	0	0.09	0	0	0	0	0	0	0.57	1.05	0.43	0	0.18	0.3	0	0	0.91	0	0.7	0	0.24
AK026758	0	0	0	0	0.14	0	0	0	0.66	1.21	4.25	2.55	3.73	0.6	0	1.02	0.4	0.44	0.75	0.92	0.54	0.67	0.42	0
AK026777	0	0	0.63	0	0	1.26	0.87	0.15	1.25	2.1	3.21	0	0	0.32	0	0.38	0	0.3	0.17	0	1.02	0.51	0.1	0
AK026905	0.3	0.18	0.36	0.79	2.95	0.25	0.26	0.98	4.29	3.88	2.26	0.73	0.37	1.65	0	0.33	0.58	1.43	0.18	0.7	0.75	3.12	0	0.3
AK027091	24.74	32.88	8.48	14.27	5.57	6.14	0.8	0.57	1.93	1.5	2.03	5.78	5.9	14.09	13.31	1.34	1.55	1.21	2.17	2.8	8.06	0.6	0	1.82
AK027145	0.38	8.19	1.63	2.23	6.43	0.82	0	0	0	0	0	1.16	0	0.44	0	1.78	1.38	0	0	0.37	0	0	0	0.48
AK027190	0.41	0.37	0.09	0.98	0.74	0.48	0	0	0	0	0	0	1.19	0	0	0	0.01	0	0	0	0	0	0	0
AK027252	3.31	0	0	0	0	0	0	0	0	0.43	2.87	0	8.42	0	0	10.94	5.06	0	0	44.94	0	4.98	1.83	2.61
AK027257	0.61	0.4	0.07	0.37	2.47	0.06	2.87	0.66	0.61	2.38	5.77	11.63	7.51	9.46	9.57	4.69	3.44	9.74	6.3	5.64	18.26	9.09	13.48	4.83
AK027332	7.27	12.83	0	6.16	0.94	12.21	19.43	22.89	2.73	27.14	14.47	0	6.99	0	22.53	0.38	15.24	0	0	14.44	0	23.56	17.62	5.87
AK027541	3.3	0.08	1.09	0.62	4.37	1.81	0.32	0.99	0.77	3.76	1.63	8.57	2.82	3.56	2.31	4.34	0.16	3.63	5.62	2.83	4.89	6.5	3.08	0.98
AK027840	6.13	0	0	4.93	0	11.28	13.31	1.24	4.39	2.65	0	0.07	4.92	1.19	6.56	4.87	8.95	0	0.62	9.05	0	15.58	16.54	2.07
AK054623	2.01	1.11	1.45	0.43	1.26	0.55	2.54	0.82	4.58	1.91	0.4	3.2	0.85	3.07	0.91	7.3	1.85	2.92	3.79	0.37	4.01	6.17	3.73	2.42
AK054635	2.17	4.24	2.35	4.19	3.16	3.86	6.4	7.13	3.95	9.71	7.27	5.59	10.93	5.69	4.61	5.47	8.34	1.49	3.37	7.08	9.1	3.79	3.38	4.37
AK054708	0.28	0.2	0.56	0.41	0.39	0.59	0	0	0	0	0	0	0	0.46	0	0	0	0	0	0	0	0	0	0
AK054710	0	0	0	0.14	0	0	0	0	0.22	0	0	0	0.09	0	0	0.16	0	0	0.51	0	0.02	0.99	0.86	0.91
AK054726	0	0	0	0	0	0	0.76	2.41	0	1.85	0.48	3.12	9.93	4.17	8.13	4.24	2.02	0.58	2.08	1.55	1.43	0.85	0.8	0.29
AK054749	0.15	10.96	1.2	2.83	1.37	3.72	0.24	1.09	4.26	7.07	1.79	0.97	2.86	0.98	0.17	3.58	1.03	0	1.3	1.87	2.24	0.79	0.38	1.08
AK054753	0.23	0.67	0.67	0.46	1.13	0	0.21	0.15	0.26	1.32	5.65	0.88	1.07	1.32	1.07	0.72	0.31	0.82	2.05	0.19	1.61	0	1.7	4.62
AK054837	4.17	1.71	3.47	1.46	1.82	0	2.79	10.31	42.72	28.25	16.64	0.2	9.72	2.35	6.4	4.66	4.87	0	3.89	2.57	1.63	2.79	5.18	8.08
AK054845	0.06	0	0	0	0	0	0	0	0	4.54	0.34	0	0.72	0	0	0	0	0	0	0.31	0	0	0.29	0
AK054921	1.81	0.55	5.14	0.29	1.82	0.2	3.51	3	14.47	0.89	7.59	0	0	0	0	0	0.28	2.42	4.2	0.73	16.07	0.23	0.51	0.57
AK054972	0.71	3.17	0.13	2.07	0.56	4.78	16.03	2.04	11.58	3.83	3.96	1.65	0.76	0	3.11	5.18	2.19	0	0.38	1.81	1.73	3.1	2.81	4.91
AK054988	0.41	0.16	0.08	0.08	0.64	0	0	0	0	0	0	0.28	0	0	0	0	0	0.16	0	0	0	0	0	0
AK054990	22.25	34.73	54.37	40.01	18.85	64.85	104.81	155.92	100.03	137.1	127.56	34.7	177.34	58.7	130.92	54.98	197.2	10.1	10.68	84.8	63.33	69.05	46.48	94.89
AK055017	2.24	9.34	9.51	8.17	25.3	2.43	3.11	9.36	3.8	9.87	22.16	7.45	12.39	5.8	8.26	8.88	10.88	5.03	9.14	7.04	9.89	7.67	10.2	10.73
AK055055	0	0	3.56	0	0	0.82	0.09	0	1.46	0	0	3.44	1.56	3.57	0.26	1.16	1.13	0.66	0	0.61	2.28	1.16	1.1	1.18
AK055197	19.05	7.12	54.84	36.28	2.12	17.56	18.85	19.37	98.32	48.93	48.13	17.31	6.05	13.31	34.16	18.51	17.32	12.93	15.99	28.02	18.82	35.28	50.33	31.6
AK055250	3.69	5.5	5.52	2.13	6.01	2.27	0	0	0	0.25	1.28	0.62	2.72	1.4	1.45	1.14	2.45	0.34	1.86	0.2	0	1.26	0.72	0
AK055254	6.32	10.01	14.96	9.97	7.72	5.61	0.08	1.07	3.84	1	0.16	3.62	2.05	1.93	1.09	2.56	0.92	1.37	1.4	1.71	1.92	1.04	0.54	1.26
AK055257	4.7	11.36	9.74	8.79	3.08	15.89	9.99	1.73	14.36	5.33	18	1.98	7.15	0.43	4.49	1.28	8.66	2.25	5.09	9.45	5.89	12.7	7.97	15.72
AK055260	0	0.23	0	0.65	0.09	1.68	0.2	0	0	0	0	1.1	0.4	1.24	0	0	0.14	0	0	0	0	0	0	0.23
AK055267	0	1.92	0	0	0	0	0	4.13	0	0	0	0.75	0	1.13	0	0	0.81	0	0.75	0	2.1	0	0	0.63
AK055272	0	0	0	0	0	0	0	0	0	0	0	0.28	0	0.83	0	0	0	0	0.55	0	0	0	0	0
AK055323	2.54	2.88	4.76	5.23	2.28	8.22	9.34	18.58	10.47	28.85	18.84	11.92	25.75	12.12	15.77	16.07	15.31	6.35	14.86	29.74	34.64	26.23	23.48	37.93
AK055332	0.54	0.74	0.9	0.79	0.93	0	1.62	0	0	0.12	0	0	0.21	0	0.36	0	0.15	0.16	1.12	0.36	0.39	0	0	0.23
AK055351	16.47	13.7	18.92	15.8	12.24	12.38	3.36	0	0	0.15	1.02	1.11	0	0.55	1.35	0.45	0.39	0.21	0	0	0.51	1.2	0.64	0
AK055364	0.91	0	0.34	1.11	0	0.27	0.07	0	1.4	0.33	3.32	0.4	0.15	0	0	0.61	0.11	0	0.4	0.64	0.28	0	0.47	0
AK055368	0	0	0	0	0	0	0	0	0	0	0	0	0	0	0	0	0	0	0	0	0	0	0	0
AK055370	1.35	0.54	2.9	1.29	0.76	1.26	1.65	1.05	7.25	2.25	5.62	0	1.38	0	0.49	0	0.74	0.09	1.1	1.7	2.16	1.79	3.28	2.22
AK055384	3.83	0.58	3.51	1.4	0.5	3.69	0.94	9.22	1.75	6.48	17.68	10.81	23.62	5.38	12.64	19.61	4.91	3.39	8.65	16.28	8.43	6.08	14.34	0.47
AK055386	0.12	0.12	4.84	1.12	0.24	0.05	2.77	3.78	2.26	6.24	4.05	9.36	10.92	12.02	6.13	15.67	7.76	3.78	4.17	6.08	4.53	6.91	1.81	1.44
AK055408	1.3	0	3.09	1.44	4.14	2.75	0.2	14.17	7.45	5.44	6.83	0	4.07	0	4.91	1.34	2.62	0	2.68	4.78	1.95	2.7	3.36	3.83
AK055458	0.39	1.62	4.32	0.47	1.92	3.34	4.32	0.05	6.56	5.07	4.02	2.92	8.73	4.05	2.48	1.34	3.17	1.54	4.4	4.2	6.03	1.37	2.77	2.13
AK055459	0	0	0	0	0	0	0	0	0	0	0	0	0	0.3	0	0	0.1	0	0	0	0	1.29	0	0.33
AK055533	11.27	10.67	10.47	14.15	8.51	7.53	0	0	0	0	0	0	0	0	0	0	0	0	0	0	0	0	0	0
AK055550	0	0	0	0	0	0	0	0	0	0	0	0	0	0	0.4	0	0.27	0.14	0	0	0	0	0	0
AK055570	0	0	0.15	0	0	0	0	0.07	0	0	0.36	0.52	0	0	0.54	0.16	0.41	0	0	0	0.36	0	0.3	0
AK055601	11.9	15.57	24.08	16.63	47.24	30.34	16.08	26.04	32.26	20.39	36.26	14.9	23.23	17.27	16.09	10.97	10.97	9.17	15.12	21.68	27.59	29.67	21.34	24.74
AK055623	3.51	5.47	9.89	12.19	12.94	5.07	0	0	0	0	0	2.82	0	0.99	0	0.2	0	0.92	0.33	0	0	0	0	0
AK055631	0	0	0	0	0	0	0	0	0	0	0	0	0	0	0	0	0	0	0	0	0	0	0	0.22
AK055656	0.67	6.68	0	0.47	0	0	0.27	0	0	0	1.82	1.09	0	0	0	0	0	0.79	0	0	0	0	0	0
AK055694	7.82	15.77	11.13	13	16.64	7.61	0.29	0.69	7	2.3	1.11	1.61	0.39	2.82	1.67	0.16	1.55	0.75	2.7	0.68	4.42	0.65	0.62	0.67
AK055712	0	0.58	0.92	0.11	19.29	0.22	5.22	5.9	30.43	9.23	2.83	2.45	9.31	3.68	5.54	3	3.24	1.14	2.45	8.37	4.51	4	10.19	9.18
AK055772	0	0	0.42	2.02	17.33	0	0	0	0	0.36	0.41	0.88	4.32	2.21	0.46	1.98	0.47	0.99	2.06	6.77	1.22	0.96	0.51	0
AK055785	10.91	14.77	17.63	18.14	23.92	25.61	5.2	12.1	1.61	8	11.69	7.22	7.22	4.48	2.55	2.21	2.65	3.08	3.87	4.34	4.69	0.69	1.43	0.71
AK055803	0.07	0.15	0.43	0.12	0.04	0.1	0	0	0	0	0	1.04	0.19	0	0.14	1.11	0.27	0	0.26	0	0	0	0	0
AK055811	0	0	0	0	0	0	0	0	0	0	0	0	0	0	0	0.88	0	0	0	0	0	0	0	0
AK055849	3.38	16.07	6.2	5.45	1.76	7.78	8.76	22.63	5.42	3.45	20.57	24.12	0	38.12	0	4.59	3.02	3.98	11.23	6.3	17.53	0.83	4.31	2.66
AK055853	0	1.64	0.73	0.92	0.51	0.84	0	0.42	0	0.16	0.52	1.52	9.23	1.15	1.22	0.81	0.12	0.34	0.19	2.5	0.26	0.31	0.22	0.32
AK055876	2.27	10.98	3.43	3.54	3.52	2.54	0.64	0.18	0.38	1.6	0.61	1.98	1.76	0.99	0.66	0	0.23	0	0	0.42	0.41	0.37	0	0.55
AK055890	0	0	0	0	0.08	0	0	0	0	1.04	0	0.51	0	0.76	0	0	0	0.14	1.77	0	0.35	0	0.44	0
AK055910	4.17	9.69	6.63	3.42	4.36	2.12	4.92	0.45	1.11	6.94	5.78	1.81	5.88	3.8	1.08	1.87	3.53	0.88	2.81	1.73	3.85	0	0.28	1.25
AK055918	2.15	6.84	6.12	4.66	5.77	1.21	0	0	0.9	0.17	0.29	0.21	0.3	0.94	0	0	0	0.35	0	0	0.57	0.17	0.6	0
AK055932	3.79	4.35	12.24	4.11	3.17	2.95	0.97	0.75	3.31	6.58	4.31	1.56	3.93	7.06	2.79	1.23	1.06	1.75	8.28	3.14	12.3	4.91	4.27	4.45
AK055957	3.67	5.69	4.47	8.98	9.08	4.8	0	0	3.45	0	1.36	0.96	0	0	0	0	1.04	0	0	0	0	0	0	0
AK055967	0.46	1.14	2.02	0.58	0.63	2.06	0.07	0.1	0.51	1.83	3.21	0.78	0.71	2.05	0.3	0.12	1.02	0.33	0.78	0.62	3.21	1.42	2.02	1.77
AK055974	1.15	1.55	2.84	0.66	0.75	0.99	0	0	0	0	0	0	0	0.51	0	0	0	0	0	0	0	0.34	0	0.56
AK055980	0	0	0	0	0	0	0	0	0	0	0	0	0	0.38	0	0	0	0	0	0	0	0	0	0
AK055981	0.56	2.93	8.17	2.95	3.31	2.83	0.32	4.85	0.26	9.17	10.96	9.99	7.77	6.64	2.3	4.68	4.97	1.31	1.18	2.26	2.03	0	1.02	1.22
AK056073	3.72	7.15	9.61	4.14	8.72	3.6	1.36	0.13	0	0.91	1.03	2.5	5.68	1.88	1.95	0.61	1.58	0.84	2.25	2.23	3.78	1.83	2.46	1.87
AK056077	2.41	2.53	2.51	1.19	1.64	0.33	0.32	4.67	0.26	0.12	0	0	0.87	0.9	0	0	0.47	0	0	0.76	0.41	0	0	0.25
AK056098	0	0.07	0	0	0	0	0.08	0	7.84	0	0.32	0	0.17	0	0	0	0	0	0	0	0.63	0.38	0.93	0
AK056105	0.06	0.08	0.08	0.07	0	0	0	0	0	0	0	0	0	0	0	0	0	0	0	0	0	0	0	0
AK056135	0	0	0	0	0	0	0	0	0	0	0	0	0	0	0	0.08	2.73	0	0	0	0	0	0	0
AK056182	1.81	0.21	3.02	4.08	1.92	6.39	0	0.88	0	0.38	0.43	0	0.92	1.88	2.11	0.38	0.33	1.74	2.5	0	6.02	4.83	1.08	1.56
AK056196	0.75	2.16	2.13	2.37	1.38	1.57	0	0	0.17	0.12	0	0.28	0	0	0	0.17	0.29	0	0	0.18	0	0	0	0
AK056211	1.57	0	0.53	0.38	0.33	0	0.15	0.53	1.08	1.01	0.28	0.41	0	0.93	0	0	0.11	0.23	0.62	0	1.98	0	0.12	0
AK056228	0.06	0.41	0.88	0.35	0	0.31	0.09	1.13	0.22	0	0	1.29	1.32	0	0.13	0.16	0	0.86	0.77	3.46	0	0.21	0.75	0
AK056246	12.77	19.95	31.71	18.41	19.95	15.72	0.28	0.26	0.22	0.95	2.44	0.51	0.56	1.16	0.26	0.31	2.14	1.13	1.78	0.81	3.84	0.83	1.32	0.84
AK056252	0	0	0	0	0.06	0	0	0	0	0	0	0	0	0	0	0	0	0	0	0	0	0	0	0
AK056253	0	14.23	3.85	3.95	2.51	7.26	5.39	6.68	14.4	2.93	0	28.85	10.47	13.24	5.17	0	4.95	5.13	0	5.52	5.91	0	0	0
AK056267	0	0	0	0	0	0	0	0	0	0.4	0	0	0	0.59	0	0	0	0.22	0.39	0.37	0.8	0.16	0	0.32
AK056351	0.94	5.42	2.86	4.43	1.63	4.74	1.93	5.93	2.94	9.75	5.56	10.44	7.15	4.5	1.56	6.64	8.21	1.67	1.49	8.95	8.2	7.28	3.02	3.57
AK056368	0.84	0.88	12.18	5.47	2.11	4.6	1.44	1.68	4.46	1.74	4.69	4.82	2.71	2.99	8.12	1.04	3.74	1.58	5.96	0.72	6.25	6.93	5.42	4.24
AK056396	0	0.2	0.7	0	0	0	0	1.93	0	3.69	2.07	9.6	0	13.3	1.8	5.94	0	0.82	13.31	0.96	24.75	0.61	5.62	1.24
AK056431	2.93	1.86	4.64	2.49	2.49	5.8	0.65	7.14	22.22	6.93	4.88	1.43	5.61	2.05	2.45	3.5	1.62	1.97	1.65	5.91	2.29	3.63	3.29	4.98
AK056432	0.56	0.45	7.29	1.34	0.56	0.98	0.12	0.96	10.29	0.66	3.9	0.68	1.12	0.96	0.37	0.42	1.51	1.39	2.55	3.87	2.19	0.59	2.33	0.26
AK056485	0.1	0.33	0.5	0.23	0.32	0.11	0	0	0	0	0	0.2	0	0.3	0	0.12	0.21	0	0.2	0	0	0	0	0
AK056486	1.16	2.55	2.63	0.9	1.51	1.22	0	0.15	1.18	0.08	0.53	1.55	0.43	2.34	1.11	0.59	0.1	0.87	0.97	0.74	0.8	1.11	0.67	0.81
AK056490	0	0	0	0	0	0	0	0	0	0	0.93	0.34	0.74	0	0	0	0	0	0	0	0	0	0	0
AK056505	0	0	1.2	0	0	0.05	0	0	0	0	0	0	0	0.3	0	0	0	0	0	0	0	0	0	0
AK056524	6.1	6.8	12.57	10.15	9.44	3.38	0	0	0	0.09	0	0	0	0	0	0	0	0	0.22	0.14	0	0	0.13	0
AK056584	0.11	0.14	1	0.06	1.4	0.13	0	0	0	0.08	0.26	0.19	0.7	0.57	0.49	0.23	0.2	0	0.38	0.24	0	0.15	0	0.47
AK056618	1.17	5.69	5.22	5.99	4.6	2.57	1.55	1.94	8.33	8	7	8.81	6.89	8.9	5.29	3.49	6.56	6.91	10.77	11.28	7	13.15	10.6	17.77
AK056623	11.55	5.64	10.77	4.21	7.41	8.18	24.31	14.18	18.41	16.54	37.86	10.42	30.26	6.58	20.69	18.67	13.79	5.72	10.27	27.73	17.55	34.27	26.63	26.21
AK056625	0	0	0	0	0	0	0	0	0	0	0	0.37	0	0	0	0	0.19	0	0	0	0	0	0.32	0
AK056657	0	5.25	9.81	5.66	0	6.89	0.28	1.04	0	1.14	1.23	1.41	3.47	4.33	1.94	0.46	0.8	0.33	2.01	1.55	3.42	1.69	1.19	1.43
AK056686	1.61	1.15	3.29	2.01	1.61	1.96	0	0.13	0	0.82	3.43	0.25	1.82	1.12	0.39	2.89	2.23	0.69	0.5	0.79	0.34	0.81	0.86	0
AK056689	0	0	0	0	0	0	0	0	0	0	0	0.39	0.29	0.59	0	0.97	0.42	0	0	0.51	0	0	0	0
AK056780	0	0	0	0	0	0	0	0	0	0	0	0	0	0	0	0.47	0	0	0.19	0	0	0	0	0
AK056817	1.03	2.94	5.18	8.7	7.95	0.23	0	0.06	0	0	0.3	0.43	0	0.32	0.11	0.13	0	0	0	0.14	0.3	0	0	0.18
AK056897	0	0	0.14	0	5.04	0.13	0.09	0	2.6	1.02	0	0.25	0.55	0.75	0.65	0	0	0.42	0.5	0.79	0.34	0.61	0	0.41
AK056973	7.71	13.62	20.42	4.21	0	6.18	4.53	1.26	0	0.44	2.24	0.57	4.76	2.42	2.25	1.65	1.14	0.6	2.15	1.38	2.98	3.08	2.19	7.64
AK056982	7.56	4.83	6.14	9.62	18.24	7.41	0	0.12	0	4.04	0	0	1.2	1.63	0.28	0	0	0.61	0.54	0	0	0	0.32	0
AK057177	1.22	8.08	2.81	0.71	3.96	1.93	1.87	2.54	5.11	2.62	1.84	4.36	20.96	5.74	5.34	10.16	3.38	2.78	3.22	3.68	6.03	3.73	3.97	3.45
AK057187	2.04	3.61	3.66	4.12	4.74	1.85	0	0.08	1.65	1.55	0	2.84	6.49	0	6.08	0.77	0.5	0	1.58	2.42	0.43	1.03	0.55	0
AK057188	0.7	0.15	0.99	0.52	8.52	0.07	0	0	0	1.2	1.11	0	0	0	0	0.65	1.41	0	0	0	0	0	0	0
AK057218	8.74	0.46	0.54	0.86	0.17	3.23	0	0	0	0.22	0	0.27	0.2	2.85	0	0.83	0.29	0	0.54	0	1.86	0	0	0
AK057259	0	0	0	0	0	0	0	0	0	0	0	0.91	0	0	0.16	0.19	0.32	0	0.31	0	0	0	0	0
AK057317	0.14	0	0.33	0	0	0.16	0	0	0	0	0	0	0	0	0	0	0	0	0	0	0	0	0	0
AK057321	89.07	57.53	78	84.91	101.04	67.12	60.59	72.59	78.35	143.18	186.76	70.16	196.06	96.23	121.43	140.21	93.43	35.09	50.76	79.99	92.72	86.16	108.06	73.49
AK057332	0	0	0	0	0	0	0	0	0	0.84	0	1.02	0	0.51	0	0	0	0	1.37	0	0.94	0	0	0
AK057379	0	0	0	0	0	0	0	0	0	0	0	0.32	0	0	1	1.17	0	0	0	0	0	0.26	0	1.59
AK057438	0	0	0	0	0	0	0	0	0	0	0	0	0	0	0	0	0	0	0	0	0	0	0	0
AK057448	0.36	0	0.94	4.86	2.14	0	0.44	0	6.33	0	0.83	0	0.44	0	0	0	0	0.17	0.3	1.93	0.83	0.25	0.17	0.25
AK057451	0.37	0.22	0.88	0.1	0	0	0	0.9	0	0.8	3.22	0.39	0.29	2.91	1.21	0.95	0.82	0.22	1.16	0	1.07	0.32	0.23	0.65
AK057455	0	0	0	0	0	0.09	0	0	0	0	0	0	0	0	0	0	0	0.38	0	0	0	0	0	0
AK057471	1.74	4.97	3.28	5.2	2.26	2.39	0	0.26	0	0	0	0.34	0.25	3.97	0.83	0.45	0.18	0	0	0.41	0.47	0	0.72	0.26
AK057473	0	0	0	0	0	0	0	0	0	0	0	0	0	0	0	0	1.18	0	0	0	0	0	0	0
AK057515	0	0	0	0	0	0	0	0	0	0	0	0	0	0.55	0	0	0	0	0	0	0	0	0	0
AK057519	0.5	1	1.14	2.21	1.57	1.25	0	0.22	2.06	0.84	0.77	0	0.41	0.42	1.42	0.63	0.52	0.78	1.4	0.54	1.16	0.91	0.62	0.86
AK057554	0	0	0	0	0	0	0	0	0	0	0	0	0	0	0	0	0	0	0	0	0	0	0	0
AK057596	7.12	6	10.72	12.22	0	5.83	8.29	7.54	21.29	25.4	15.12	10.16	6.29	11.68	10.29	5.26	12.15	0	3.96	6.75	34.61	7.88	9.02	9.24
AK057604	1.71	11.51	7.6	4.4	17.1	2.96	0.7	13.06	7.87	3.68	4.2	1.04	2.82	6.3	6.4	9.39	3.55	1.06	1.91	6.14	5.3	2.43	8.15	6.39
AK057657	34.29	30.12	23.2	25.58	33.16	29.67	25.99	31.06	47.73	36.53	65.73	62.91	81.87	32.4	49.89	50.62	48.54	30.48	19.18	64.97	43.11	50.74	55.98	33.97
AK057681	73.26	50.64	85.49	88.94	72.94	35.24	3.83	6.62	1.84	14.15	16.87	3.36	7.11	8.2	4.84	2.83	8.45	1.87	6.72	7	4.64	7.55	7.25	5.6
AK057689	0.42	0	0.5	0	0	0.71	0	0.47	6.35	0.74	0	0.89	6.61	3.99	0	4.4	3.82	2.96	1.78	10.37	2.49	6.6	5.72	11.97
AK057719	0.07	0.16	2.1	0.08	0.19	0.31	0.11	1.56	4.55	0.59	0	1.45	1.06	5.23	0.6	0.35	0.76	1.29	3.19	1.48	2.79	1.89	0.84	0.72
AK057873	3.92	6.25	7.91	3.6	1.36	6.02	7.91	7.9	2.08	2.93	4.52	0.89	0.66	0.45	0.16	0.91	0.79	0	0	0.57	0	0.73	0.17	0.74
AK057887	7.48	7.58	18.24	4.27	15.49	7.41	5.9	12.8	2.75	12.84	15.84	11.05	9.13	15.47	13.78	5.21	12.8	5.55	7.6	5.33	14.54	13.6	13.15	18.87
AK057897	0	0	0	0	0	0	1.35	0	0	3.77	0.17	3.06	1.43	5.22	0.8	0.56	1.29	0	3.68	0	10.15	0	4.09	7.4
AK057978	3.66	4.28	3.24	8.72	2.7	5.11	2.54	5.22	9.2	11.29	22.78	12.76	25.28	8.11	10.19	10.97	7.35	3.9	10.39	17.19	12.62	17.38	13.16	11.28
AK058136	0	0	0	0.11	0.81	0	0	0.11	0	0	0.58	0	0	0	0	0	0.44	0	0	0	0	0	0	0
AK058177	0	0	0	0	0	0	0	0	0	0	0	0	0.34	0	0	0	0	0.26	0	0	0.64	0	0	0.39
AK074396	0	0	0	0	0.14	0	0	0.12	0	0	0	0	0.66	0	0	0	0	0	0	0	0	0	0	0
AK074469	12.98	6.32	9.43	14.64	47.41	13.07	17.65	7.28	4.06	11.41	20.37	5.46	30.92	11.36	3.29	7.21	8.01	1.87	5.47	9.96	8.71	6.86	3.9	10.16
AK074476	1.85	6.55	6.58	2.11	1.16	9.21	11.45	7.92	8.48	11.52	14.62	11.35	12.59	9.08	3.13	3.57	4.48	5.25	8.53	6.33	16.33	3.46	2.15	4.86
AK074615	4.4	7.53	9.12	5.2	6.82	3.84	0.69	0	3.33	0.71	3.94	0.19	2.1	0	1.42	0.12	0.4	0.21	0.96	0.85	0.53	1.24	0.15	2.06
AK075019	11.62	12.06	21.54	17.38	14.16	7.9	0.86	0	7.37	0.39	0.27	3.24	2.64	2.15	1.2	1.19	1.03	0.38	3.24	0.68	1.34	0.47	1.56	1.36
AK075337	5.69	1.54	7.36	3.71	0	1.02	0	0.55	1.72	0.89	0	7.67	3.04	3.88	1.07	3.82	3.54	4.19	2	0	2.92	0	11.65	3.54
AK090553	0	0	0	0	0	0	0	6.92	1.02	1.44	0	0.58	0	0	0.3	0.71	0.31	0.32	1.16	0	2.41	0	0	0.97
AK090593	0	6.97	3.1	0.59	0.3	3.15	1.76	0.47	2.11	4.58	1.25	2.11	1.11	1.81	0.79	2.03	3.66	0.84	3.93	0.19	4.57	1.47	1.05	1.76
AK090604	0	0	0	0	0	0	0	0	0	0	0	0	3.04	0	0	0	0	0.57	0	0	0	0	0	0
AK090674	16.91	8.57	11.09	6.27	2.47	15.43	13.1	11.81	27.84	22.18	34.98	18.52	27.54	15.22	14.01	15.31	17.14	6.47	10.12	20.04	18.78	15.67	9.09	10.4
AK090681	0	7.81	0	0.26	0	0	0	0	0	0	0	0	0	0	0	0.2	0	0	0	0	0	0	0	0
AK090688	0	0	0	0	0.37	0	0	0	0	0	0	12.22	1.28	50.36	3.49	8.73	11.07	6.01	18.94	1.3	15.24	0.47	3.54	1.45
AK090700	20.01	14.98	34.86	24.94	25.32	15.85	0.18	0.06	4.18	0.69	4.67	4.36	6.06	3.65	3.15	1.78	4.22	0.14	0.73	0.93	1	0.2	0	0.4
AK090736	25.69	42.41	38.21	34.4	37.59	23.36	0.55	1.1	0.56	3.94	1.8	0.77	0.55	2.63	0.75	1.15	1.46	0.68	2.06	0.83	3.73	0.87	1.09	1.86
AK090788	0	0	0	0	0	0	3.97	0	0	0.94	0.79	0	0	2.56	0	0	0	0	0	0	0	0	0	0
AK090844	4.85	3.17	4.64	2.77	1.45	2.37	1.79	1.05	12.13	11.57	14.16	5.36	13.98	3.55	4.57	5.76	4.33	0.84	4.29	4.78	7.37	10.63	10.05	9.97
AK090854	0	0	0.26	0	0	0	0	0	0	0	0	0	0	0	0	0	0	0	0	0	0	0	0	0
AK090895	0	0	0.23	0.07	0.09	0	0.29	0	0	1.1	0.37	0	0.4	2.03	0.28	0.33	0.85	0.15	0.81	0.34	0.74	1.32	0.47	0.45
AK090904	17.93	21.51	25.31	23.11	19.69	10.84	7.39	6.97	7.47	10.53	11.53	2.99	24.12	3.31	7.68	7.56	6.41	1	3.2	3.69	3.29	15.42	9.59	19.05
AK090973	1.93	4.25	5.7	1.16	10.84	5.25	3.11	13.63	13.9	6.43	12.88	4.89	5.32	5.13	2.2	5.07	6.42	2.02	1.98	3.07	6.48	2.11	4.5	5.16
AK091028	0.19	3.07	2.65	0.93	1.75	0.37	0.5	2.77	0.6	2.81	1.89	1.14	1.85	1.38	7.39	0.35	1.33	0.83	2.98	1.46	2.52	4.66	3.93	4.57
AK091070	1.49	2.49	2.13	1.31	0.48	1.06	0	0	0	0	0	0	0	0	0	0	0	0	0	0	0	0	0	0
AK091102	0.81	0.68	0	0.9	0.5	0	0.11	0	1.09	0	1.29	0.31	1.14	0	0.32	0.38	0	0.35	0	0.79	0.43	0.87	0.54	0
AK091265	0	0	0	0	0	0	0	0	0	0	0	0.77	0.57	0	0	0	0	0	0	0.49	0	0	0	0
AK091275	0.48	1.09	1.12	0.99	0.82	1.65	0	0	0	0	0	1.02	1.04	1.53	0.17	0.75	0.53	0.79	3.87	2.7	8.39	1.82	0.71	1.86
AK091365	0.37	0	0.36	0.32	0.1	0	0.22	0.62	0	0.49	0	0	0	0	0	0	0	0	0	0.2	0	0	0	0.24
AK091624	21.01	13.61	1.65	11.16	2.74	31.32	3.79	2.61	24.48	7.69	21.14	16.94	41.33	14.55	16.19	24.1	16.07	7.52	7.01	24.19	7.85	24.28	13.16	8.81
AK091688	8.38	9.98	21.95	14.61	7.25	7.66	8.66	23.83	11.31	13.23	23.06	11.08	15.56	10.3	7.61	14.85	9.33	6.32	7.56	5.27	8.44	7.87	12.43	10.39
AK091729	6.83	13.49	18.84	12.97	7.96	12.82	0.44	10.11	19.9	5.29	1.65	3.71	7.21	4.75	2.86	3.67	4.12	1.34	2.7	2.68	2.48	11.81	3.13	9.22
AK091866	1.42	1.07	0.66	1.53	2.89	0.33	0	0	0	0	0	1.11	1.46	3.34	4.04	2.84	1.17	2.1	4.22	0.28	3.66	12.8	6.54	4.23
AK091889	0	0	0	0.07	0	0	0	0	0	0	0	0.27	0	0.8	0.97	0.49	0	0	0	0.51	0.37	0	0	0
AK091906	3.23	2.88	6.45	3.3	4.21	1.7	0	0	0	0	0	0	0	0.45	0	0	0.16	0.34	0.91	0.19	0	0	0	0.5
AK091996	6.41	5.68	11.07	5.89	10.62	4.49	0.38	0.27	0.76	0.71	0.48	2.27	1.15	0.26	0.54	1.17	0.28	0.49	1.05	1.33	0.48	1.13	0.91	0.58
AK092048	24.66	25.16	35.3	12.65	12.05	22.36	12.65	14.74	10.38	22.51	31.54	15.97	18.01	8.3	10.5	16.59	12.85	6.15	27.4	34.28	34.07	42.98	41.73	66.88
AK092080	2.04	1.28	8.11	8.94	7.47	2.94	0.42	0	0	1.02	0	0	3.37	0	0.54	0.78	0	2.45	1.51	0	2.02	4.31	2.84	0.92
AK092087	0.46	1.12	1.55	2.09	1.03	2.75	0	0.17	0.57	0.09	0	2.39	4.3	1.96	2.48	0.66	0.8	0.24	2.83	2.91	1.49	3.89	0.75	2.16
AK092098	7.1	6.72	10.43	3.53	5.75	3.46	1.01	4.95	0.46	2.34	5.57	8.73	4.53	12.22	2.3	1.96	2.16	4.19	4.23	1.14	4.86	3.08	0.8	1.02
AK092135	0	0.06	0	0	0	0.11	0	0	0	0	0	0	0	0	0	0	0	0	0	0	0	0	0	0
AK092150	0.93	2.65	9.72	6.34	1.87	2.08	2.54	6.2	2.74	10.57	11.57	24.34	8.05	17.88	5.19	8.34	2.69	10.85	9.45	4.16	21.67	0.46	2.28	7.38
AK092313	20.27	17.42	13.96	11.1	7.41	22.3	3.04	0.36	0	0.27	1.14	0	0	0.49	0	0	0	2.83	7.3	7.06	19.39	7.7	4.54	10.2
AK092331	11.95	16.69	16.33	8.94	14.45	11.72	36.74	22.41	39.66	44.29	33.35	62.97	45.49	43.58	31.93	49.27	24.08	28.69	50.57	44.66	111.58	60.05	66	67.58
AK092380	6.54	18.46	8.59	8.3	29.79	12.43	5.08	4.85	3.67	22.91	16.94	52.35	22.5	70.24	13.6	18.97	19.73	4.81	36.55	4.84	39.69	2.2	9.28	5.19
AK092451	0	2.22	2.22	1.1	3.61	0.28	0	0.07	0	0.85	0.36	1.04	1.91	0.39	0	0	2.34	0.44	0.52	2.33	2.51	0.64	0.3	0.22
AK092541	0.37	0.79	0.17	0.41	0.4	0	5.28	4.85	19.69	4.43	5.96	7.09	2.04	4.64	3.54	4.34	1.63	2.75	5.56	3.55	9.36	9.56	5.72	4.36
AK092589	0	0	0	0	0	0	0	0	0	0	0	0	0	0	0	0.44	0	1.19	0	0	0	0	0	0
AK092619	3.12	2.51	6.27	4.25	3.93	2.79	0.11	0	0	0	0	0	0.22	0	0	0.16	0.16	0.34	0	0	0	0	0	0
AK092965	16.48	28.49	45.46	33.34	19.19	27.14	21.4	8.8	4.33	8.64	8.31	4.83	1.86	0.61	2.82	9.29	2.93	0.48	3.1	3.24	2.52	1.01	1.63	2.26
AK093002	0	0	0	0.35	0	0	0	0	0	0.11	3.33	0	0	0	0	0	0.71	0	0	0	0	0	0	0
AK093026	8.68	4.27	4.62	7.47	6.28	3.6	3.34	6.74	0.24	9.08	13.04	8.37	9.12	5.69	4.78	4.96	6.42	3.32	7.85	3.97	13.77	5.72	8.14	7.86
AK093107	0	0	0	0	0	0	0	0	0	0	0	0	0	0	0	0	0	0	0	0	0	0	0	0
AK093114	0	0	0	0	0	0	0	0	0	0	0	0	0	0	0	0	0	0	0	0.21	0	0	0	0
AK093124	0.59	1.75	0.95	0.73	1.02	0.62	0	0	0	0	0	3.31	3.98	0.45	0.63	1.29	0.96	0	0	0	0	0	0	0
AK093193	0	0	0	0	0	0	0	0	0	0	0	0.34	0.25	0.51	0	0	0	0	0	0	0	0	0	0
AK093203	1.63	0	0.85	0.16	0	0.32	0.33	0	0	0.12	2.48	1.79	2.63	0.45	0.16	1.83	0.79	1	4.79	2.1	1.65	1.22	1.04	1.99
AK093205	0	0	0	0	0.1	0	0	0	0	0	0	0	0	0.91	0	0	0	0	0	0	0	0	0	0
AK093214	0	0	0	0	0	0	0	0	0	0	0	0.61	0	0	0.32	0	0	0.17	0.31	0.2	0.42	0.25	0	0
AK093219	0	0	0.09	0	0.1	0	0	0	0	0	0	0	0	0	0	0	0	0	0	0.2	0	0	0	0
AK093256	0	0.92	1.17	0.47	0	0.39	1.4	0.38	0.26	7.27	4.08	1.18	4.12	2.67	0.46	1.08	0.31	0.33	1.48	0.76	2.04	0.96	0.86	0.98
AK093264	0	0	0	0	0	0	0	0.4	0	0.43	0	0	0	0	0	0	0	0.88	0	0	0	0.84	0	0
AK093299	0	1.18	3.16	1.4	1.46	0.4	0.14	5.58	2.33	2.03	1.05	6.44	9.2	2.28	2.57	7.2	1	2.96	2.28	6.07	3.67	1.55	2.21	0.63
AK093301	0.14	0.09	0.51	0	0.38	0.16	1.31	0.46	0	1.59	2.06	1.2	2.63	0.45	0	1.46	2.05	0	0.6	1.34	1.24	0	0.52	0
AK093356	1.4	1.68	0.21	10.72	0	0	0.55	1.55	1.32	0.62	6.22	11.08	4.39	8.87	3.11	1.83	3.17	3.7	2.22	2.39	8.25	6.7	5.62	7.45
AK093362	0.17	0.4	0.5	0.28	0.8	2.82	0	0	0	0	0	0	0	0	0	0	0	0	0	0	0	0	0.41	0.29
AK093363	0	0	0	0	0	0	0	0	0	0	0	0	0	0.44	0	0	0	0	0	0	0.4	0	0	0
AK093370	0	0	0	0	0	0	0	0	0	0.56	0	0.34	0	0	0.18	0.21	0.18	0	0.34	0	0	0	0	0
AK093381	0	0	0	0	0	0	0	0	0	0	0	0	0	0	0	0	0	0	0	0.21	0	0	0	0
AK093403	0	0	0	0	0	0	0	0	0	0	0	0.69	0	0.52	0	0	0.73	0.19	0.69	0.22	0.95	0.28	0.2	0.58
AK093412	0	0	0	0	0	0	0	0	0	0	0	0	0	0	0	0	0	0	0	0	0	0.27	0	0
AK093416	4.29	0.84	3.1	0.47	0.57	0	0.43	0.3	6.72	2.18	0.82	2.36	4.56	3.56	7.7	7.6	5	7.09	4.74	4.35	23.65	13.5	11.83	13.53
AK093443	0.18	0.27	1.41	1.02	0.52	0.35	1.27	0.77	9.81	8.28	0.66	0.54	5.78	1.99	3.82	3.07	6.46	1.83	4.66	13.95	10.9	6.72	3.36	7.63
AK093513	0.95	0.41	4.14	1.28	0.36	0.74	0	0	2.83	0	0.91	0	0.97	0	0	0.2	0.17	0	0	0.21	0	0	0	0
AK093519	5.86	8.39	11.71	8.76	6.44	4.23	0	0	0	0	0	0	0	0	0	0	0	0	0.21	0	0	0	0.08	0
AK093525	0	0	0	0	0	0	0	0	0	0	0	0	0	0.48	0	0	0	0	0	0	0	0	0	0
AK093534	42.21	93.6	193.9	80.98	186.25	115.91	162.18	117.92	293.27	239.49	274.13	156.48	288.45	112	121.37	163.32	63.42	61.84	354.62	158.81	220.02	118.82	158.33	189.37
AK093551	10.26	17.26	25.74	12.49	14.86	19.34	7.36	4.27	7.7	14.89	6.44	11.16	11.42	26.18	4.05	7.14	9.86	9.27	7.8	12.93	9.65	9.09	6.16	11.87
AK093552	0	0	0	0.08	0	0	0	0	0	0	0	0	0	0	0	0.19	0	0	0	0	0	0	0	0
AK093600	12.98	19	29.36	17.58	30.92	18.16	0.11	0	0	0.66	0	0.63	0.23	3.3	0.49	1.73	0.17	0.17	1.25	0	2.16	0.26	0	1.04
AK093758	1.85	0	0	0	4.63	0	0	0	0	0	0	0	0	0	0.94	0	0.64	0.33	0	0	0.83	0.99	1.4	0
AK093892	0	0	0	0.05	0.06	0	0.07	0	0	0	0	0	0.44	0.3	0	0.12	0.32	0.34	0	0.13	0	0.65	0	0.17
AK093898	4.81	3.42	3.34	4.8	1.9	3.61	5.12	9.03	4.47	13.86	13.42	14.35	17.86	10.03	13.87	17.55	10.68	1.86	8.73	9.16	10.23	11.06	11.13	11.29
AK093940	0	0	0	0	0	0	0	0	0	0	0	0	0	0.29	0	0	0	0	0	0	0	0	0	0
AK094117	5.8	8.33	13.04	11.99	14.26	16.21	0	0	0	0	0	0	0.26	0	0.37	0.43	0	0	0	0	0	0	0	0
AK094156	10.68	17.54	18.46	13.89	14.92	24.1	25.46	28.5	34.96	60.45	80.64	28.5	47.88	37.48	20.5	18.71	33.88	12.75	47.44	47.16	83.63	31.72	29.04	40.91
AK094188	1.82	1.63	0.47	1.14	1	4.07	0	0.74	1.04	2.84	0.66	1.19	0.35	0.36	0.87	0.58	0.88	2	1.92	0.61	2.63	1.75	3.32	4.57
AK094196	0.4	0.4	6.86	0.6	0.72	0.84	0	0	0	0.29	0	0	0.26	0	0	0	0	0.2	0.71	0.45	0	0	0	0.3
AK094280	0.6	0.63	0	0	0	0.17	0.69	9.05	0	0.04	1.76	1.87	2.8	2.87	0.83	0	0.83	0	0.45	0.3	4.39	1.04	0	1.99
AK094325	9.38	2.68	2.76	4.04	0.85	4.62	1.29	5.16	7.98	8.21	13.41	12.66	9.95	42.55	12.74	10.27	21.93	3.78	17.4	9.79	13.4	4.32	9.73	10.29
AK094342	0.58	0	0	0.16	0	0	0.44	0.78	0.53	2.12	1.68	0.61	1.34	0.91	0.63	0.56	0.16	0.17	0.91	1.17	1.26	0	0.18	0.25
AK094343	0.22	0	0.09	0.08	0.3	0.17	0.8	2.03	0	0.65	0	0	1.85	0.95	0.16	0	0	0.18	0.63	0.2	0	0.26	0.55	0
AK094352	0.93	1.86	5.06	4.21	5.77	1.59	0	0	0	0	0	0.59	0	0	0.15	2.71	0	0.16	0	0.19	0	0	0	0
AK094413	12.51	19.17	12.51	18.82	22.04	13.14	32.45	61.23	20.1	48.6	37.6	34.59	9.87	58.42	30.76	28.34	25.04	20.28	38.54	12.66	49.73	23.92	31.76	28.83
AK094462	0.31	0.93	0.37	0	0	0.17	0	1.01	44.55	0	0.45	0	0	0	0	0	0	0	0	0	0	0	0	0
AK094480	0.83	0.12	1.11	1.38	0	0.45	0	1.58	0	3.6	1.17	0.97	1.84	2.77	0.4	0.54	3.12	0.63	9.24	5.88	9.67	2.72	9.22	1.83
AK094525	0.54	0	1.95	3.07	4.03	0.84	1.66	1.08	0.15	2.3	0.48	3.35	0.64	1.86	2.93	0.11	0.65	1.67	3.53	2.47	2.66	0.14	0.51	1.75
AK094561	2.22	2.62	4.32	3.16	0.83	5.28	0	0	0	0	1.97	0	0	0	0	0	0	0	0	0.45	0	0	0	0
AK094577	0.68	0.84	1.71	1.55	1.02	4.19	0.33	0	0	0.93	0	3.29	0.66	3.39	0	0.14	0.85	3.45	1.21	1.06	0.46	0	0.26	0.2
AK094599	0.24	0.49	0.48	0.81	0.39	0.81	0.08	0.05	0	0.09	0	0	0	0.64	0.22	0.13	0	0.36	0.42	0.41	0.29	0	0.25	0
AK094611	0	1.97	2.29	0.4	0	0	1.34	0.54	0.52	0.86	2.03	0.7	5	1.4	1.57	3.41	1.12	0	2.59	1.48	1.54	2.62	2.28	0.49
AK094621	5.28	7.67	2.14	3.5	3.87	4.47	19.83	11.5	9.64	13.21	17.35	4.93	8.23	7.43	9.37	11.85	14.92	4.82	8.34	21.4	16.51	31.92	29.94	38.22
AK094639	4.09	4.85	19	2.05	1.9	0.47	3.84	0.69	3.62	2.54	8.59	2.32	5.66	1.71	0.58	1.73	0.3	0.11	0	1.78	0.56	0	0.22	0.22
AK094644	0	1.73	0.82	0	0	0.14	0.67	0.48	0	2.6	0.36	2.64	2.71	5.56	2.2	1.94	0.84	1.62	8.46	1.35	17.82	1.07	2.45	4.17
AK094692	4.38	3.9	6.06	2.65	3.53	0.99	0.21	0	0	0.48	0.81	0.58	0.43	1.73	0	0	0.31	0.32	0	0.37	0.8	0	0	0
AK094733	0	0	0	0	0	0	0	0	0	0	0	0.62	0	1.4	0	0	0	0	0	0.2	0	0	0.18	0.52
AK094786	2.4	6.98	4.62	5.31	2.54	2.33	0.47	1.01	1.99	14.77	22.18	1.18	4.33	1.08	4.81	0.86	3.05	2.6	1.8	2.8	10.93	7.61	7.21	13.64
AK094818	4.87	2.55	5.23	2.11	5.58	2.44	0	0	2.28	1.73	1	0.26	0.35	0	0	0	0.49	0.27	0.94	0	0	0.66	0.59	1.29
AK094859	21.89	33.54	29.98	10.55	3.12	13.74	10.81	28.33	30.64	27.46	19.3	8.2	16.92	21.45	9.88	8.31	10.12	6.02	9.51	7.02	20.49	13.34	9.74	16.85
AK094909	1.54	0.39	1.17	0.39	0.33	0.39	0	0	0	0	0	0	0.42	0.44	0	0	0	0.16	0.29	0.18	0.8	0.71	0.34	0.96
AK094915	0	2.31	2.12	0	0	0	0	0	7.67	0.13	0	0	0	1.95	0	0	0	0	0	0	0	0.26	0	0
AK094916	0.15	0.22	0.52	0.95	0.91	0.15	0	0.18	0	0.8	0.24	2.85	1.3	3.82	1.11	0.98	2.44	0.99	3.23	1.02	7.59	0.87	0.83	1.03
AK094929	0	0	0	0	0.37	0	0	0	1.58	0	0.31	0	0	1.03	0	0	0	0	0	0	0.31	0	0	0
AK094934	3.8	0.7	1.89	5.91	1.97	7.21	0.07	1.97	0.16	2.52	6.17	4.48	4.79	6.19	4.37	3.65	3.44	2.5	1.31	0.71	2.83	8.81	5.3	3.88
AK094945	0.07	0.39	0.95	3.41	7.31	1.26	0.1	3.61	0	2.37	0	1.37	1.61	1.24	1	0.34	0.58	0.15	4.13	1.58	3.03	1.57	1.91	3.43
AK094963	0	0	0.06	0	10.48	0	0	0	0	0	0	0.19	0	0.29	0	0	0.21	0	0.98	0.12	0.27	0.16	0.23	0
AK094985	2.99	5.19	8.92	4.46	4.68	11.32	5.96	15.31	12.7	8.02	12.4	10.43	7.37	11.29	8.68	1.62	5.86	4.61	15.37	3.72	13.8	4.74	2.15	8.58
AK094990	4.27	1.62	8.04	4.28	4.96	6.75	6.36	1.89	11.58	11.1	9.19	2.52	6.39	5.73	5.51	2.9	3.84	1.4	4.32	5.28	5.35	1.88	3.3	6.9
AK095045	4.11	3.5	6.48	2.93	1.74	1.78	0.09	0	0.21	0	0	0.24	0	0.36	0	0	0	0.4	1.2	0	1.98	0.59	0.7	0.6
AK095057	18.92	62.24	39.93	30.34	16.82	23.07	13.27	10.73	31.39	18.27	18.93	18.53	30.88	22.37	13.62	15.02	14.63	15.7	23.31	13.04	25.34	20.24	18.22	18.63
AK095112	11.39	10.64	13.48	2.3	0.07	4.18	2.34	9.76	29.03	20.18	20	12.49	51.57	7.25	12.1	8.08	9.17	7.28	9.88	21.7	17.41	14.07	14.13	11.7
AK095132	0	0	0.37	0.11	0	0	0.23	0	0	0.79	0.59	2.8	1.58	1.62	0.79	1.58	0.68	0.72	1.51	0	1.48	0.7	0.12	1.79
AK095151	1.37	1.8	1.22	2.46	1.16	0	7.56	3.58	0.27	1.61	5.03	0.6	4.4	1.8	5.75	1.81	0.92	0.16	0.9	2.41	2.45	1.12	1.52	1.1
AK095179	20.45	26.04	17.76	19.97	20.68	22.6	35.08	25.28	28.56	38.98	35.04	34.52	33.83	26.24	26.2	19.15	27.4	20.03	21.96	30.88	27.01	31.09	37.66	31
AK095187	0	0.07	0	0	0	0.07	0	0	0	0	0	0.26	0	0	0	0	0	0	0	0	0	0	0	0
AK095210	1.02	3.66	5.75	0.8	1.1	0.86	0.21	0.22	5.25	6.34	5.13	4.58	10.92	2.15	2.68	2.45	1.36	0.16	2.01	8.23	2.37	0.93	0.5	0.71
AK095221	0	0	0	0.74	0	0	0	0	4.79	0.97	1.36	3.64	1.01	2.68	0.1	0	0.52	0.63	0.99	0.38	0.27	0	0.11	0.66
AK095242	3.39	7.3	4.47	5.73	5.22	1.38	6.85	7.93	15.85	17.4	20.39	14.97	43.41	14.57	13.36	9.67	14.41	6.5	8.77	12.43	15.03	7.17	11.89	9.21
AK095267	0.59	0.23	6.41	7.38	2.65	1.42	4.36	2.76	0.72	13.54	14.82	9.87	22.71	4.33	0	1.26	1.31	2.52	4.12	5.27	6.26	2.35	3.35	4.12
AK095285	0.29	2.76	1.91	0.81	0.79	0.42	0	0	0	0	0	0	0.46	0	0	0	0.55	1.05	3.34	1.33	2.58	1.81	0.6	4.15
AK095310	0	0	0	0	0.24	0	0	0	0	0	0	0.25	0	0	0	0	0	0.14	0.51	0	0	0	0	0
AK095335	8.58	10.34	10.59	2.51	3.6	4.83	9.44	5.5	1.27	4.51	9.45	11.03	15.86	10.34	3.03	3.05	2.85	4.06	8.13	7.57	14.03	4.23	2.17	10.2
AK095365	0	0.67	3.29	1.19	4.31	0.68	0.86	2.68	8.57	1.77	1.89	0.2	1.3	0	0.1	0.48	0	0.88	0.99	1.13	0.81	0.16	0.57	0.33
AK095366	0	0	0.26	0.56	0.16	4.62	4.62	3.3	28.79	10.13	2.13	5.74	27.38	5.28	14.95	16.01	15.75	2.45	11.69	18.82	9.32	18.28	15.34	14.62
AK095439	5.61	2.02	2.83	1.68	0.23	1.81	1.68	8.57	3.11	5.98	1.47	6.61	6.41	5.65	6.4	4.8	7.05	1.79	6.26	1.93	13.25	4.79	7.02	6.52
AK095498	0	0	0	0	0	0	0	0	0	0	0	0	0	0.29	0	0	0	0	0	0	0	0	0	0
AK095546	4.03	3.42	6.54	6.91	9.06	4.5	4.83	3.25	1.86	22.28	6.65	7.34	24.86	2.49	3.04	1	1.13	1.43	1.21	2.64	3.64	1.14	0.99	0.48
AK095583	33.39	38.07	39.55	23.67	22.98	40.2	29.73	10.98	44.85	16.84	33.21	0	0	54.9	38.39	0.01	0.9	29.27	32.24	36.35	27.13	18.44	21.53	0
AK095618	0.43	1.14	1.46	2.05	0.66	0.67	0	0	0.32	0.15	0	0	0	1.09	0	0.22	0	0.2	0	0	1.01	0	0	0
AK095621	5.48	2.23	2.87	3.07	2.47	1.74	14.1	0	0	4.27	0.4	1.16	2.12	1.74	0.15	1.59	0.76	1.61	2.9	1.11	5.58	1.18	1.01	3.37
AK095699	0.33	0.78	2.14	1.37	0.85	1.08	0	0	0	0	0	0.5	0	0.75	0	0.3	0.13	0	0	0	0	0	0	0
AK095700	8.78	14.16	19.2	9.73	23.85	10.03	12.58	8.61	9.05	14.92	6.73	28.55	7.56	16.6	14.26	7.78	6.22	27.54	23.57	6.81	21.55	10.18	6.56	6.66
AK095721	18.04	10.45	8.71	10.17	12.53	5.97	17.66	14.45	7.81	26.27	20.76	12.03	32.56	17.51	19.15	9.96	12.24	10.47	13.69	17.03	16.83	9.12	16.99	18.03
AK095988	2.18	4.05	5.69	2.93	1.72	1.87	0	0	0.07	0.11	0.17	0.1	0	0.15	0	0	0.11	0	0.1	0	0	0	0	0
AK096023	0	0.34	0.1	0	0	0	0	0	0	0	0	1.27	0	1.91	0.17	0.39	0.33	0.53	0.63	0.41	0	0	0	0
AK096066	1.17	6.72	1.37	4.32	1.53	0.35	0	3.82	0	4.74	0	6.79	7.41	10.84	5.24	2.48	3.29	1.66	3.47	3.47	6.15	5.29	1.14	4.1
AK096159	0.14	0.26	1.58	0	0.66	0.08	0.21	0.22	2.29	2.53	2.81	1.45	0.64	3.06	0	1.96	0.77	0.16	4.08	1.12	3.21	3.32	1.85	3.87
AK096219	6.3	4.64	7.61	5.33	5.59	3.78	0	0.15	1.77	1.55	2.72	0.94	2.07	1.55	0.29	0.52	0	1.83	1.8	0.72	0.39	0	0.65	3.05
AK096233	0	0.49	4.44	0.47	0.27	0.32	5.2	0	4.26	0.5	4.48	0	0.24	0	0.28	0	0	0	0	0	0	0	0	0
AK096291	10.62	8.29	16.92	12.18	11.63	7.63	0.3	0.07	7.58	3.45	3.37	3.26	3.98	3.68	1.85	3.6	2.72	0.76	1.63	2.25	3.37	1.55	2.2	1.58
AK096314	0	0	0	0.17	0	0.44	0.61	0.27	0.73	0.17	1.44	0.63	0.46	0.63	0.54	0.77	0	0.35	0	0	0	0.34	0	0
AK096329	0	0	0	0	0	0	0	0	0	0	0.77	0	0.21	0.84	0	0	0	0	0	0	0	0	0	0
AK096335	3.8	4.89	7.66	6.76	4.58	3.63	0	0.05	3.14	0.09	8.46	0	1.72	0	0	0	0	0	0	0.68	0	0	0	0
AK096379	0.06	0.59	0.07	0.67	0.05	0.03	0.67	0	0	0.6	0.17	0	0.36	0.56	0	0.45	0	0	0.12	0.31	0.17	0.2	0	0
AK096395	4.33	10.69	7.92	2.64	3.94	0.39	0.96	4.18	13.97	2.95	4.58	3.49	22.12	6.65	1.98	5.84	5.9	2.83	4.38	9.13	14.5	9.94	3.46	6.78
AK096475	12.08	7.58	5.16	10.2	5.49	10.13	17.96	10.47	1.42	10.3	11.72	5.8	8.77	16.12	4.05	4.65	5.06	3.54	17.26	6.59	24.44	7.52	12.17	11.44
AK096499	0.12	0.36	0.69	0.34	0.24	0	0	0	0	0	0	0	0	0.71	0	0.43	0	0	0	0	0.32	0	0	0.19
AK096549	0	0	0	0	0	0	0	0	0.6	0	0	0	0	0.35	0	0	0	0.15	0	0.15	0	0	0	0
AK096592	4.05	0.81	12.64	3.98	5.77	3.59	2.64	6.24	3.86	12.04	12.93	5.86	14.81	5.62	10.88	6.07	8.97	2.18	8.18	13.69	9.27	21.5	14.58	13.84
AK096622	1.07	0.53	2.07	1.69	1.49	1.15	0	0.56	22.91	0.75	1.26	1.65	1.87	1.1	0.19	3.46	1.06	0.41	0.37	0.7	1.76	1.19	0.21	0.3
AK096718	0	0.06	0.44	0.36	0.13	0.05	5.23	10.83	14.46	15.09	1.88	53.85	35.81	28.43	85.9	89.68	162.69	0.35	0.2	1.06	1.35	0.32	2.21	0.49
AK096766	0	0	0	0.62	2.27	0	0	0	0	0	0	0	0	0	0	0	0	0	0	0	0	0	0	0
AK096792	0	0	0.22	0	0	0	0	0	0.34	0	1.6	0	0	0.58	0	0	0	0.43	0	0	0	0	0	0
AK096803	0	0.08	0	0	0	0	0	0	0	0	0	0	0	0	0	0	0	0	0	0	0	0	0	0
AK096834	1.84	4.37	6.24	5.62	4.43	2.52	0.84	0.42	2.43	0.57	4.47	1.86	3.91	2.45	0.85	4.4	3.67	0	0.23	1.04	0	0.94	0.54	0.19
AK096898	0	0	0	0	2.25	0	0.29	0	1.39	0.32	8.75	4.67	0.58	1.17	0.41	1.44	0	0.43	0	0.5	0	0	0	0.65
AK096932	0	0.08	0	0	0.09	0	0	0	0	0	0	0	1.05	0.43	0.15	1.22	0.45	0	0.29	0	0	0	0	0.24
AK096976	0	0.38	0.88	0	0	0	0.16	0.95	0	1.41	5.48	0	0	1.14	0.14	1.52	0.14	0.01	0	1.37	0	1.51	0	0.54
AK096982	7.4	3.39	14.56	1.31	5.65	7.64	1.43	4.46	24.82	5.9	11.56	27.35	6.68	33.55	1.61	2.36	9.44	7.96	12.05	5.55	10.51	9.41	2.65	8.34
AK096987	0	0	0	0	0	0	0	0	0	0	0	0	0	0	0	0	0	0	0	0	0	0	0	0
AK096995	0.06	2.29	6.86	0.52	2.63	0	1.6	0.97	4.46	6.21	10.01	4.57	5.92	4.36	2.24	4.77	1.14	2.21	3.77	5.67	4.07	3.49	2.07	2.24
AK097012	0	0	0	0	32.78	0	0	0	0	0	0	0	0	0	0	0	0	0	0	0	0	0	0	0
AK097119	5.02	12.21	33.33	13.64	11.69	7.03	3.4	11.72	16.62	12.81	22.12	43.49	41.3	19.88	18.5	18.47	19.45	12.49	15.38	14.13	26.42	13.92	13.28	7.48
AK097142	0	0	0	0	0	0	0	0	0	0	0	0	0	0	0	0	0	0	0	0	0	0	0	0.22
AK097143	574.08	756.75	1078	671.84	902.29	631.45	414.42	508.59	954.82	1111.86	1231.48	1074.08	1540.88	2716.87	665.83	873.28	680.93	411.3	896.18	802.78	1372.58	654.61	610.32	472
AK097161	0.06	0	0.14	0.13	0	0	0	0	0	0	0	0.73	0.36	0.37	0	0.15	0	0	0	0	0	0	0	0
AK097190	0.06	3.1	0.22	0.68	0.92	0.28	0.09	2.6	0.91	3.93	3.58	1.56	6.66	3.13	1.49	2.06	3.15	0.58	1.04	0.99	1.43	0.42	0.3	0.86
AK097193	0.38	0.91	1.36	0.62	1.4	0.68	0	0	0	0	0	0	0	0	0	0	0	0	0	0.16	0	0	0	0
AK097242	2.33	3.4	2.62	2.69	1.69	1.61	0.17	0	0.19	0	0	0.22	0	0	0.12	0	0	0	0	0.28	0.3	0	0.25	0
AK097288	5.93	1.79	5.6	2.71	0.89	7.25	0.78	5.46	2.53	2.25	6.94	2.14	8.96	4.15	3.02	3.92	4.35	0.68	2.91	3.41	2.31	1.87	1.24	1.9
AK097289	1.02	1.92	3.76	2.04	3.86	1.52	1.24	0.49	1.75	2.37	3.82	8.63	4.34	4.11	2.12	2.32	0.89	4.3	3.42	2.78	3.25	1.72	2.3	1.73
AK097351	0	0	10.74	1.43	2.06	0	0	0	3.23	1.13	0	2.71	1.35	1.35	1.91	0.56	1.94	1.51	0	0.59	0	0	0	0
AK097370	2.58	10.19	10.11	6.37	4.34	25.69	3.19	9.02	7.65	10.99	17.57	8.76	26.49	2.8	7.19	16.4	7	3.85	1.33	10.17	4.02	3.46	5.08	3.75
AK097428	0.15	0.35	1.03	1.44	0.88	0.4	0	0	0	0	0	0	0.22	0.46	0	0	0	0	0	0	0	0	0	0
AK097432	3.3	11.33	16.83	15.42	1.54	33.29	0.27	0.34	0.43	0.35	0	0	0.68	1.61	0.58	1.88	1.62	0.84	0	0	6.62	0	2.46	0.69
AK097447	0.62	0.41	1.27	2.03	0.25	1.11	0	0.07	0	0	0	0	0	0	0	0	0.28	0	0	0	0	0	0	0
AK097453	1.08	0.29	0.5	0.33	2.35	0	3.06	1	2.41	1.95	2.99	2.77	1.8	2.47	1.37	1.81	2.6	0.44	1.44	2.14	1.36	0.8	2.06	2.04
AK097472	22.47	79.47	28.93	42.45	29.52	76.89	25.71	27.73	14.73	14.21	25.35	40.65	12.6	42.08	13.87	10.4	12.52	16.07	20.58	12.25	26.38	31.51	22.2	45.92
AK097493	0	0	0	0	0	0	0	0	0	0	0	0	0	0	0	0	0	0	0	0	0	0	0	0
AK097500	0	0	0	0	0	0	0	0	0	0	0	0	0	0	0	0	0	0	0	0	0	0	0	0
AK097527	2.54	3.94	5.98	2.92	1.91	2.25	0	0	0	0	0	0.33	0	0	0	0.41	0	0.18	0.33	0	0	0	0.13	0
AK097571	0	0.27	0	0	0.15	0	0	0	0	0	0	0	0.7	0.71	0	0.29	0	0.26	0	0	0	1.54	0.82	0
AK097585	0	0	0	0	0	0.07	0	0.07	0	0.46	0	0.84	1.02	0.84	0.44	2.39	0.44	0.62	0	0	0	0	0.32	0
AK097590	4.69	10.15	4.88	3.6	2.63	15.1	0.38	0	0	7.28	7.3	4.99	1.54	5.48	0.55	0	3.83	4.58	3.09	1.34	2.9	5.17	7.64	1.74
AK097622	0	0.19	0	0.09	0	0	0	0	0	0	0	0.68	0	0	0	0.21	0	0	0	0	0	0	0	0
AK097624	0.87	0.74	0.59	1.21	0.21	0.55	0	0	0	0	0	0	0	0	1.21	0	0.15	0	0	0	0	0	0	0
AK097625	0.22	0.57	0	0.57	0	0	0.29	0.07	0	0	0.72	5.66	0.81	0.84	0.17	1.29	1.39	1.9	1.84	0.17	1.47	0.21	0.65	0.66
AK097658	0.19	1.14	1.55	0.76	0.84	4.68	0.28	0.49	0	2.18	0.53	19.84	3.93	13.32	4.16	6.17	1.01	11.22	13.61	14.23	17.16	3.65	5.2	3.46
AK097686	0	0	0	0	0	0	0	0	0.39	0	0.61	0	0	0	0	0	0	0	0	0	0	0	0	0
AK097694	0.08	2.88	5.07	3.12	25.08	0.63	6.64	8.7	8.27	23.42	48.03	10.45	54.56	8.63	26.22	27.28	17.49	2.63	3.38	35.19	16.76	27.25	21.14	5.62
AK097701	3.69	8.22	7.87	4.63	1.7	2.18	0	0	0	0	0	1.18	1.2	2.46	0.34	0	0.17	0.72	1.31	0.21	0.9	0.27	0.57	0
AK097702	0	0	0	0.14	0	0	0	0	0	0	0	0.52	0.19	0.39	0.81	0.64	0	3.34	2.08	1.33	3.22	0	0.75	1.3
AK097706	1.55	0	1.44	0.8	1.09	0.69	0.85	5.7	8.64	9.29	9.7	7.3	5.16	3.14	2.17	3.95	4.81	2.33	2.87	2.33	6.1	2.76	2.27	4.33
AK097722	0	0	0	0	0	0	0.75	1.67	0	1.54	0.47	4.1	2.76	6.17	6.41	3.14	2.89	1.9	14.71	1.75	6.6	14.49	2.97	6.54
AK097759	17.49	0.58	1.36	2.09	0.73	0.42	0	4.27	1.09	0.26	2.16	3.13	3.67	4.23	1.63	2.3	3.8	0.17	3.76	0.4	4.31	2.29	1.45	4.42
AK097787	0	1.03	0	0	0	0	0	0	0	0.5	0	0.3	0	0.46	0	0	0	0	0.61	0	0	0	0	1.01
AK097791	0.08	0	0.09	1.62	0	0	0	0	0.27	0	0.42	2.69	0.67	2.3	0.32	0.56	0.16	0.39	0.92	0	1.27	0	0.18	0.25
AK097794	3.32	1.72	9.39	3.65	0.82	2.95	2.79	5.36	14.37	3.14	2.52	0.73	2.95	2.19	9.32	5.14	7.52	1.02	2.19	2.12	4.53	6.25	8.88	6.96
AK097803	20.03	19.84	16.46	10.54	9.24	14.52	2.3	10.84	0.31	1.02	9.85	0.39	2.89	7.65	5.43	3.23	17.69	0	5.72	0.47	11.29	5.05	1.76	12.64
AK097816	0	0	0	0	0	0	0	0	0	0	0	0	0	0	0	0	0	0	0	0	0	0	0	0
AK097829	5.13	1.77	4.38	3.31	4.52	3.33	0	0	0	0	0	0.52	0	0	0	0	0	0	0.26	0	0	0	0	0
AK097836	0	0.09	0	0	0	0	0	0	0	0	0	0	0	0.46	0	0	0.16	0.34	0	0	0.85	0.25	0	0
AK097853	0.31	0.25	0.37	0	0	0	0	0	0	0	0	0	1.61	1.97	0.23	0.27	0.23	0	3.94	0	0.6	0	0.25	0
AK097866	0.59	0.3	0.61	0.47	0.73	0.26	0	0	0	0	0	0	0	0	0	0	0	0	0	0	0	0	0	0
AK097878	0.99	0.97	1.56	0.48	5.55	10.56	1.81	4.03	0	1.28	0.36	2.87	0.96	1.97	0.54	0.96	0.55	2.04	2.09	2.34	4.32	3.19	2.72	6.95
AK097902	0.95	1.31	5.56	1.45	0.8	0.49	0	0.43	0	1.84	0	1.12	0.41	0	0.15	0	0	0	0	0	0	0.45	0	0
AK097910	0	1.35	0	0	0	0	0.2	1.94	0	0	1.16	0	0.41	0.84	0.44	1.31	0	0.31	0.56	0.54	0	0.91	0.32	0
AK097921	2.51	6.36	10.41	4	4.91	1.78	0	0	0	0.98	1.65	0	0	0	0	0	0	0	0	0	0	0	0	0
AK097934	1.95	9.38	9.55	10.19	7.4	8.22	5.98	4.44	1.67	12.57	18.5	7.94	7.63	3.71	4.99	4.19	5.06	6.11	7.13	8.57	10.19	3.35	9.2	7.74
AK097952	0	0	0	0	0	0	0	0	0	0	0	1.81	0	0.45	0	0.37	0.16	0	0	0	0.42	0	0	0
AK097957	7.79	12.64	4.67	9.47	1.89	1.8	1.97	0.13	1.58	3.6	0.99	3.13	6.49	2.55	0.74	1.07	2.16	1.35	0	1.09	1.62	0	0.72	2.39
AK098012	3.27	6.02	4.71	5.21	4.54	3.19	0	0	0	0.24	0	2.03	0.21	0	0.45	1.42	0.15	0.16	0.58	0	0.4	0	0.5	0.48
AK098067	6.1	1.28	1.39	2.53	0.07	0.05	2.83	1.61	9.68	3.33	4.09	5.83	0.73	1.24	3.06	3.93	1.81	3.37	4.01	3.03	4.8	5.2	3.63	3.28
AK098095	26.46	27.36	33.27	20.05	21.61	23.76	38.76	40.75	95.24	56.88	63.39	25.39	44.48	10.7	30.9	20.12	19.51	8.53	9.92	24.71	17.18	24.87	24.92	23.24
AK098198	9.58	11.8	5.29	4.77	8.04	2.79	0.85	0	0	0.24	0	0	0	0	0	0	0	0	0	2.24	0	0	0.34	1.46
AK098263	0.74	1.07	1.65	1.76	0.74	0.82	0.21	2.56	0	1.74	0.78	3.97	3.33	1.28	1.63	1.04	0	0.16	0.57	1.09	3.52	0	0.33	1.89
AK098303	0	0	0	0	0	0	0	0	0	0	0	0.02	0.96	0.77	0.13	0.49	0.14	0	0.52	0	0	0	0	0
AK098438	20.42	8.58	11.76	6.67	11.15	12.91	12	9.83	20.71	17.07	15.96	6.07	6.79	10.44	4.97	3.36	5.19	1.94	12.74	9.05	11.96	10.6	4.52	4.33
AK098491	5.59	13.78	14.57	13.11	8.14	13.25	2.84	6.53	5.74	10.49	8.76	11.08	5.08	8.43	12.61	13.28	4.7	11.02	10.51	6.03	15.53	7.33	6.25	4.16
AK098548	0	0	0	0	0.21	0	0	0	0	0	0	0	0.48	0	0.68	0	0	0	0	0	0	0	0	0
AK098560	0	0	0.11	0	0	0	0	0	0	0	0	0	0	0	0	0	0	0	0	0	0	0	0	0
AK098570	4.05	9.69	13.11	9.49	11.15	10.47	0	0	0	0	0	0	0	1.26	0.89	0	0.9	0	0	0	0	0	0	0.71
AK098656	0	0	6.87	0	0	0	0	0	0	0	0	0	0	0	0	0	0	0	0	0	0	0	0	0
AK098665	0.36	0.55	0.69	0.2	0.13	0.22	0	0	0	0	0	0	0	0	0	0	0	0	0	0	0	0	0	0
AK098705	0	4.23	0.11	0.74	0	0	0	0	0.35	0	2.23	0	0.3	0.6	0	0.25	0	0	0	0	0	0	0	0
AK098727	12.69	10.78	19.52	15.06	16.29	8.98	0.4	0.06	0	0.33	0.42	1.09	0.83	1.49	0.15	0	0	0	0	0.32	0.34	0.2	0	0.31
AK098769	29.52	12	7.84	13.67	11.54	51.89	66.23	35.4	36.03	54.47	49.74	4.45	22.99	0	24.01	22.78	15.88	4.83	3.28	15.08	1.01	27.89	28.95	23.18
AK098783	1.29	7.94	5.7	7.73	0.56	8.99	0.88	1.25	3.45	2.49	9.64	2.43	4.46	1.37	2.06	2.04	6.09	2.54	1.22	1.75	2.09	0.99	1.58	3.28
AK1	11.14	21.31	44.24	7.33	4.79	10.33	26.39	14.36	21.49	25.44	15.17	12.83	15.76	20.51	23.46	9.93	11.61	3.8	5.25	6.36	7.58	14.51	9.26	11.76
AK122764	0	4.25	0.22	0	0	0	0	0	0	0.65	0	10.12	0.58	2.33	3.69	0.48	0	4.77	5.45	0	2.18	0.64	0.46	1.96
AK123067	0	0	0	0.12	0	0	0	0	0	0	0	0	0	0	0	0.28	0	0	0	0	0	0	0	0
AK123141	6.12	0.68	1.86	0.89	1.96	1.15	1.29	1.16	7.46	3.44	4.22	1.13	2.61	1.71	2.02	2.96	1.79	0.36	1.46	1.86	3.34	5.13	4.12	4.3
AK123181	5.81	1.96	10.76	9.14	4.16	1.78	0.08	0	3.12	5.25	2.56	3.35	3.13	8.32	2.4	2.25	3.24	2.8	2.65	1.48	2.67	1.88	1.61	2.22
AK123263	3.98	5.94	8.52	7.72	8.67	3.77	0.46	4.94	0.55	13.05	8.14	4.23	7.28	2.86	6.49	10.98	3.9	0.94	1.27	0.4	0.87	0.17	0.73	3.16
AK123292	0.55	6.04	4.22	4.67	3.54	5.75	3.68	1.77	2.93	7.15	14.25	10.52	22.65	5.63	10.84	12.67	7.02	19.13	6.75	36.57	12.46	20.4	46.35	16.6
AK123298	0	0.09	0	0	0	0	0.44	0.16	0.53	0	0	1.83	2.01	1.83	1.11	1.68	3.54	0.17	1.22	0.58	1.26	0	0	0.76
AK123300	0	1.81	0.96	0	0.14	0	7.78	7.26	9.34	8.23	4.72	0	1.25	1.92	1.11	1.57	0.23	0.24	0.85	1.09	2.35	0	0.49	0
AK123314	0.35	4.58	6.95	1.72	1.06	4.4	0.38	7.9	11.81	6.92	9.69	3.73	3.96	0.88	10.06	16.58	6.63	0.58	2.52	6.89	4.41	10.35	31.83	19.17
AK123332	18.88	9.59	11.76	18.82	5.53	10.34	6.12	8.66	5.3	7.47	13.98	7.05	21.29	5.28	19.62	6.49	10.72	0.87	1.92	11.46	3.34	9.7	6.49	11.27
AK123393	0	0	0	0	0	0	0	0	0	0	0	0	0	0	0	0	0	0	0	0	0	0	0	0
AK123416	0	0	0.07	0.06	0	0	0.09	0.12	0	0	0	0.48	0.35	0	0	0	0	0.13	0	0.62	0	0.59	0.28	0
AK123440	0.17	0.83	0	0.3	1.07	0.86	0	0	0	0	0	0	0	0.55	0.19	0	0	0.2	0.36	0.47	0	0.59	0	0
AK123450	0.08	11.9	2.68	9.89	0.73	2.98	5.24	15.91	1.84	5.04	3.88	19.96	16.23	40.58	2.74	6.44	17.61	8.01	19.3	6.95	28.54	13.72	4.27	9.63
AK123459	4.19	1.35	1.19	5.09	11.87	5	13.29	16.59	2.29	20.68	27.53	8.34	24.47	2.2	24.24	9.72	5.68	3.15	4.73	27.52	5.71	8.14	15.04	6.57
AK123543	22.88	21.45	39.28	27.71	32.83	14.81	0.48	0	0.58	0.09	0	0.89	0.33	0	0	0.14	0	0.25	0	0.14	0	0.18	0.13	0
AK123582	0.86	1.16	3.95	2.13	1.21	0.76	0	0.06	0	0.29	0	0.23	0.34	0	0	0	0	0.52	0	1.63	0	0	0	0.19
AK123584	20.81	27.67	37.72	32.74	45.37	18.5	0	0.05	0.18	0.35	0	1.27	0.93	2.06	0.22	0.78	0.22	0.48	2.12	0.27	0.87	0.17	0.78	0.53
AK123617	6.04	16.27	7.42	5.05	7.44	7.84	9.43	5.45	5.47	6.81	7.26	4.25	10.83	7.17	1.68	4.28	3.94	0.95	4.77	3.68	7.71	3.45	4.68	6.49
AK123632	0	0	0	0	0	0	0	0	0	0	0	0	0	0	0	0	0	0	0	0	0	0	0	0
AK123654	0.47	0	1.45	0.23	10.16	1.44	0.77	0.31	4.86	8.5	4.85	2.88	15.73	5.62	3.22	1.5	4.57	1.77	2.76	9.29	8.13	5.6	5.6	3.92
AK123675	48.83	46.14	55.72	38.98	41.44	60.99	85.41	41.44	67.7	45.43	68.55	20.22	56.6	19.48	60.03	45.6	48.83	7.23	11.42	44.36	22.3	65.03	41.97	42.07
AK123758	1.36	0	0	0	0	0	0	0	0	0.09	1.21	0.44	0.16	0	0	0	0	0.37	0.44	0.28	0.3	0.18	0.25	0
AK123771	5.95	0.86	0	2.67	3.03	1.03	0	0	0	0	1.66	0	0	1.03	0	0.49	0	0	0.54	0	0.66	0.81	0	1.18
AK123816	0.39	0	0	0.11	0.11	3.56	0	0	0	0	0	0	0	0	0	0	0	1.37	0.27	0.17	0.75	0.22	0.79	0.68
AK123826	2.33	3.41	4.86	3.26	4.42	3.09	0.15	1.58	2.77	0.17	1.17	5.3	6.99	4.15	3.64	5.05	4.91	3.19	4.46	4.73	6.7	4.14	2.82	1.58
AK123834	0	0	0	0	0	0	0	0	0	0	0.82	0.3	0.44	0	0	0	0.31	0.33	0	0	0.41	0	0	1.48
AK123868	0	13.67	4.89	4.94	6.24	0	3.02	6.25	24.41	9.31	12.37	2.78	0	1.91	0	0	1.79	1.79	9.02	2.18	32.77	0	9.3	0
AK123872	3.43	2.01	3.11	4.51	2.79	1.3	1.56	1	8.77	2.43	2.52	2.75	7.92	3.45	4.64	1.4	3.5	2.3	3.67	3.8	2.2	1.49	2.12	4.56
AK123889	123.3	183.69	243.39	181.8	202.93	149.71	32.02	35.16	71.52	77.66	89.08	184.3	147.62	521.12	68.26	96.2	64.27	72.08	162.14	88.88	200.13	76	67.72	64.21
AK123891	15.1	22.46	40.77	29.1	31.29	13.28	1.94	0	4.43	8.87	0.87	2.21	2.8	0.95	1	1.82	2.07	0.88	1.9	1.55	1.31	0.71	2.27	1.35
AK123934	0	0	0	0	0	0	0	0	0	0	0	0.91	0	1.36	0	2.25	0	0	0.4	0	0	0	0.53	0
AK123947	0.42	0	0.42	0	1.03	5	0.55	0	1.36	0.37	0	0.47	0	1.87	0	0	0.48	0	5.5	1.97	14.21	2.28	3.78	2.65
AK123976	7.3	4.67	7.12	9.69	6.96	4.61	0.1	0.44	0	0.93	0.78	1.41	1.25	0	0.59	0.35	0.6	0	0.85	0.18	0.78	0.92	0.33	0
AK123998	14.21	5.06	11.18	8.94	10.26	4	3.2	11.39	22.76	3.91	12.1	5.36	24.23	6.61	3.2	5.29	6.69	3.4	8.06	11.41	5.37	9.03	7.52	9.73
AK124056	0	0	0	0.21	0	0	0	0	0	0	0	0	0	0	0.41	0	0	0.44	0	0	0	0	0	0
AK124066	0	0	0	0	0	0	0	0.09	0	0	0	0.33	0	0	0	0.2	0	0.19	0	0	0.46	0	0	0
AK124130	8.57	15.31	39.48	12.54	13.28	9.31	3.76	2.29	2.76	8.37	11.1	56.33	19.3	62.22	8	11.53	18.17	24.89	30.07	16.81	37.24	6.12	9.17	15.81
AK124131	0.23	0	3.79	0.51	0	0	0.25	0.2	0	0	1.11	0	0.98	0	0	0	0	0	0	0	0	0	0	0.11
AK124179	1.54	6.21	6.16	3.96	4.34	0.79	0	0	0	0	0	0	0	0	0	0	0	0	0	0	0	0	0	0
AK124194	15.43	17.68	22.83	18.09	19.04	16.1	0	0	0	0.19	0	0.29	0.71	4.24	0.11	0.25	0	0	0	0.14	0.28	0.19	0.24	0.61
AK124197	4.06	3.85	7.06	4.53	5.23	2.98	0.16	0.05	0.4	0.37	0.2	0	0.46	0.24	0.41	0.1	0.17	0.21	1.2	0.09	0.43	0.36	0.09	0.37
AK124226	0	0	0.22	0	0.31	0	0	0	0	0	0	0	0	0	0	0	0	0	0	0	0	0	0	0
AK124233	10.18	7.78	10.94	9.54	8.37	6.22	7.91	7.58	17.53	12.94	22.3	17.44	22.43	17.05	20.71	23.73	19.07	12.54	31.31	14.66	36.65	23.68	19.93	14.15
AK124262	0	0.21	0	0.06	0.31	0	0	0	0	0	0	0.24	0.36	0.37	0	0.3	0	0	0	0.15	0.33	0	0	0.6
AK124272	0.83	0.32	0	0.09	0	0	0	0	0	0.1	0	0	0	1.35	0	0	0	0	0	0.14	0.31	0	0	0
AK124308	4.73	4.53	8.09	3.53	4.27	3.97	1.14	1.79	0.54	0.37	6.69	4.54	9.34	4.56	1.74	5.56	10.08	1.18	1.21	3.87	4.18	0.25	0.7	1.26
AK124327	0	0	0	0	0	0	0	0	0	0	0	1.64	2.17	0.49	2.4	4.42	0	0.73	0.33	0	0	0	4.38	1.09
AK124399	0	0	0.47	1.54	4.76	0	0.15	0	0	2.05	0.29	0	0	0.63	0.33	0	0	0.35	0.42	0.13	4.01	0	0	0.52
AK124433	2.27	7.07	7.57	6.08	2.23	6.01	1.44	3.16	1.35	4.07	2.78	6.56	5.07	8.26	2.31	3.75	5.78	2.44	2.48	3.78	3.79	1.32	2.4	2.43
AK124439	10.68	12.35	10.12	8.88	12.62	4.73	0.12	0	0	0.52	0.44	0.63	1.39	0.48	0	0.39	0.17	0	0	0.2	0	0	0.35	0
AK124465	0	0	0	0	3.2	0	0.08	0	5.31	0	2.96	1.58	0.17	1.36	0	0.14	1.19	0	0	0.43	0.93	0	0	0.56
AK124484	1.23	1.69	2.93	3.46	2.3	2.74	8.41	7.7	5.22	9.15	12.1	0.79	4.68	4.18	1.24	3.41	0.84	0.66	4.37	1.27	4.39	0.32	2.54	3.31
AK124523	12.92	13.83	17.79	14.63	14.81	8.82	0.87	4.1	1.62	3.37	6.58	3.45	5.65	4.39	1.24	2.6	4.9	2.07	6.38	2.88	14.25	3.24	2.15	9.71
AK124578	4.44	4.87	7.38	5.19	5.02	2.65	0.59	1.73	0	0.33	1.28	1.28	1.28	0.53	1.21	0.57	1.1	0.39	0.7	0.3	0.32	0.57	0.13	0.67
AK124673	2.28	2.68	3.74	2.69	3.29	1.43	0	0	0	1.03	0	0	0.19	0.2	0	0	0	0.07	0	0.08	0	0	0	0
AK124680	0	0.24	2.92	3.26	1.44	1.92	0	5.89	0.67	2.63	1.42	6.94	7.36	3.48	3.61	5.35	8	1	2.32	4.93	13.1	10.05	9.68	7.05
AK124682	0	0	0	0	0	0.04	0	0	0	0	0	0.76	0	0.23	0	0.09	0	0.25	0.15	0.1	0.21	0	0.44	0.76
AK124806	4.36	0.27	4.6	8.17	3.43	0.26	0	0	0	0	0	0	0.57	0	0	0	0.2	0	0	0.25	0.8	0	0	0
AK124820	1.48	2.31	4.91	1.78	7.94	1.66	0	0	10.17	0	0	0	0	0	0	0	0	0	0	0	0	0	0	0
AK124832	6.24	8.56	12.88	8.5	11.08	7.84	0	0	0	0.09	0	0.45	0	0	0.7	0.27	0.35	0.25	0.67	0.14	0.31	0	0	0.19
AK124857	0.1	0	0.13	0.76	0	0	0	1.98	5.38	0.63	0.61	2.43	1.29	2.33	0.92	0.67	0.35	1.97	1.33	1.55	5.16	0.72	0.51	0.18
AK124930	9.06	0.1	0.38	0.41	0	0.14	0.36	0	0	0.69	0.61	0.43	0	1.67	1.09	0	0.67	0	1.81	7.49	2.72	1.29	1.27	2.61
AK124939	0	0.09	0.46	0	0	4.83	0.12	2.17	10.77	6.52	7.16	12.31	15.48	6.83	7.27	10.32	9.59	0.18	0.32	2.07	0	0	0.56	1.08
AK124950	0.07	0.1	0	0	0	0.09	0	0.25	0	0	0	0	0	0	0.34	0.2	0	0	0.32	0	0	0.26	0.19	0
AK124970	4.96	8.02	7.01	4.14	9.02	5.06	14.42	8.61	3.87	21.79	17.41	9.98	8.13	10.36	8.89	4.88	7.95	3.22	18.89	5.37	14.35	17.62	12.33	19.91
AK124973	10.59	16.89	22.91	14.27	9.87	5.72	0.12	0.08	0	0.13	0	1.78	0	0.98	0	0.2	0	0.73	1.17	0	2.25	0.8	0.57	0
AK125001	0	0	0	0	0	0	0	0	0	0	0	0.34	0	0	0	0	0	0	0.34	0.22	0	0	0	0
AK125040	0.51	0.05	2.81	1.12	0	0	0	0	0	0.43	0	0.53	0	0	0	0.11	0	0	0.35	0	0.73	0.29	0.1	0.29
AK125051	12.04	5.27	8.51	2.36	1.97	5.87	44.88	16.77	24.68	34.99	28.79	6.42	7.13	2.08	3.99	4.34	4.76	1.6	3.22	3.14	4.41	3.35	2.25	2.38
AK125078	0.46	2.75	2.39	2.01	2.97	0.25	0.27	0	0	0	0	0	0	0	0	0	0	0	0	0	0	0	0	0
AK125128	0	0	0	0	0	0	0	0	0	0	0	0	0	0	0	0	0	0	0	0	0	0	0	0
AK125157	0	0	0	0.23	0	0.12	0	0	0	0	0	0	0	0.66	0	0	0	0.49	1.77	0.28	0	0	0.26	1.11
AK125212	2.04	7.23	8.02	6.06	2.3	4.03	2.08	2.82	1.46	9.69	8.55	5.73	4.03	10.07	5.34	2.63	5.41	0.8	14.59	2.74	24.65	4.66	2.77	4.32
AK125237	0	2.18	0	0.51	0	0	0	0	0	0	2.72	0	0	0	0	0	0	0	0.96	1.17	1.35	0	1.13	0.81
AK125257	2.15	4.4	9.06	3.15	2.24	2.42	0	0	0	0	0	0	0	0	0	0	0	0	0	0	0	0	0	0
AK125288	17.45	32.91	20.87	24.71	33.46	27.2	0.86	1.07	0.44	0.97	1.23	1.35	1.17	2.89	0.66	1.95	0.78	0	1.38	1.47	2.14	0.5	0.58	0
AK125301	40.26	43.35	72.11	34.95	45.51	29.53	19.37	34.46	28.25	47.1	53.03	25.59	9.98	42.07	19.43	29.14	31.94	25.42	50.57	14.39	91.15	53.51	44.19	63.8
AK125311	1.65	0.62	1.82	0.58	1.76	0.59	0	0	0	0	0	0	0	0.46	0	0	0.48	0	0	0	0	0	0	0
AK125333	0	0	0	0.05	0	0.03	0	0	0.51	0.12	0	0.2	0	0.59	0	0.06	0	0	0	0	0.13	0	0	0
AK125397	0	0	0	0.11	0	0	0	0	0	0	0	0.41	0	0	0	0	0	0.46	0	0	0	0	0	0
AK125412	20.06	37.19	43.11	32.66	28.09	18.12	0.18	0.98	3.49	2.35	1.38	5.99	5.13	9.57	0.91	0.72	2.37	5.02	6.25	2.9	5.16	3.12	1.01	2.08
AK125463	0.64	0.84	0.5	1.05	2.09	1.23	0	1.9	0	0.66	0.32	1.19	0.67	2.11	0.48	0	0	0.27	1.18	0.29	2.25	1.13	0.93	1.34
AK125489	23.86	40.47	68.1	41.4	46.56	21.46	1.12	0.47	1.89	0.51	2.56	0.93	2.27	0.46	0.8	1.18	0.65	0.69	0.31	1.18	1.28	1.54	0.76	2.05
AK125500	1.43	0.94	1.88	3.16	1.79	3.06	1	1.1	3.74	5.1	7.41	23.41	16.53	11.33	10.51	5.67	7.27	15.85	6.03	12.06	25.42	6.99	5.73	5.71
AK125516	1.34	0	0.34	0.17	0	0	0	0	0	0	0	0.2	0	1.2	0	0.12	0	0.11	0	0.25	0.55	0	0.11	0.49
AK125532	0	0	0	0	1.18	0	0	0	1.06	0	1.01	0.24	0.54	0.37	0	0.15	0	0.27	0	0	0	0	0	0
AK125558	0	0	2.61	1.21	1.48	0.68	0	0	0	0	0	0	0	4.74	0	0	0	0	0	0	4.86	0	0	0
AK125594	2.09	0	0.08	0	0.09	0	0	0	0	1.81	0	0.59	0.22	0	0	0	0	1.64	0.59	0.56	1.21	0.72	0.51	1.22
AK125598	3.91	0	4.33	1.07	3.79	9.79	0	1.9	5.45	6.85	9.77	28.61	67.84	12.83	15.39	23.47	8.49	7.95	5.03	34.74	12.17	19.36	26.18	19.21
AK125599	1.66	1.56	2.93	2.31	1.77	1.73	0	0	0	0	0.35	3.6	6.79	1.16	4.68	15.4	1.22	0	0	0.33	0	0.21	0	0
AK125676	0	0	0	0	0.97	0	0	0	6.03	0	0	0.86	1.58	3.23	0.45	0.79	5.01	1.44	2.15	0.83	2.37	0.35	0.5	0
AK125684	5.38	3.74	1.23	1.24	18.14	8.9	0.11	0.72	1.35	0.51	3.42	5.88	11.83	6.06	8.88	0.76	1.31	1.21	4.34	2.58	9.4	3.03	2.69	3.35
AK125686	0	0.22	1.09	1.12	0.18	1.02	0.28	0.19	0	0	0	0.75	0.56	0.57	0.2	0	0	0	0.38	0	1.04	0	0	1.26
AK125699	5.67	3.42	6.77	5.16	0.32	3.02	24.06	5.01	8.36	23.29	31.1	6.29	19.6	8.97	12.83	11.43	17.7	2.32	8.98	11.47	4.92	12.12	9.04	18.16
AK125701	10.14	16.93	26.01	18.77	16.76	8.14	0	0.44	0.3	0.42	0	6.17	5.08	2.58	1.25	1.26	0.73	4.28	7.21	1.75	5.68	4.19	1.59	0.86
AK125726	4.53	2.75	0.13	0.2	0	0	5.7	0	0	0.94	2.08	5.66	1.43	2.86	0.2	3.4	2	5.74	6.11	4.15	10.86	2.49	3.11	5.34
AK125727	52.98	48.09	33.63	30.34	78.41	43.84	32.67	25.21	16.68	30.67	23.91	14.81	23.38	26.2	18.54	11.69	20.75	17.62	17.71	38.26	20.94	19.76	24.18	31.15
AK125749	2.13	1.22	8.02	4.98	3.98	3.73	0	0.09	0	2.38	0.5	1.09	0.27	1.63	0.38	0.67	0	1.21	2.18	0	0.5	0	0	0
AK125759	0	0	0	0	0	1.64	0.54	0.19	0	0	0	0.68	0	0.52	0.42	1.98	1.72	0.26	2.29	0.83	4.4	0.64	0.89	0.35
AK125769	18.22	34.02	39.48	29.1	57.48	16.65	3.42	1.72	0.79	0.75	15.46	6.36	6.45	4.56	7.73	2.78	4.32	1.86	0.61	13.55	5.84	13.82	12.81	6.8
AK125821	0	0.04	0.16	0.07	0	0.04	0	0.11	0	0.45	0.38	0.56	0.31	1.26	0	0.85	0.15	0	1.4	0.27	1.34	0.45	0.4	1.62
AK125858	0.69	4.87	1.07	0.9	1.17	1.37	0.24	0	0	0	0.61	0.11	0	0.17	0.15	0	0	0.31	0.67	0	0.91	0.27	0.06	0
AK125860	1.8	0.89	2.02	0.99	1.17	1.21	0.49	0.28	12.14	2.9	1.44	3.03	4.6	2.21	1.86	0.86	0.94	0.74	1.49	1.92	2.43	0.13	0.35	1.25
AK125871	1.78	5.25	5.31	2.46	1.93	2.65	2.44	1.76	6.8	2.97	3.77	1.51	0.9	2.07	2.71	1.17	2.82	0.15	0.83	0.35	0.38	0.78	0.24	0.57
AK125960	0	0.18	0	0.89	0	0.04	0.12	0	2.24	0	1.55	5.96	0	0	3.01	2.75	1.19	0.9	7.1	0	0	1.96	1.4	1.6
AK126075	0	0	0.16	0	0	0	0.13	0	0	0	0	0.56	0.82	0.56	0	1.13	0.39	0	0.56	0	1.02	0	0	0
AK126080	0.26	0.52	1.98	0.63	0.06	3.17	0.2	1.27	1.75	2.77	0.76	2.38	1.21	3.31	1.05	1.01	1.93	0.72	6.24	0.82	8.82	2.68	1.27	4.11
AK126213	0.08	0.1	0.38	0	0	0	0	0	0	0	0	0	0	0	0	0	0	0	0	0	0	0	0	0
AK126225	15.55	1.63	3.43	8.45	4.04	1.66	12.05	19	13.83	19.99	17.86	7.62	27.36	7.19	24.15	21.99	33.85	3.22	6.03	12.48	7.76	19.81	31.02	23.08
AK126253	5.37	14.15	17.34	9.75	15.54	12.93	0	1.13	0	2.51	2.01	0.58	4.71	3.07	5.47	3.57	2	0	3.8	1.12	0.8	5.71	1.18	2.18
AK126266	0	0.06	0	0	0	0	0	0	0.19	0	0	0	0	1.29	0	0	0	1.28	0	0	0	0	0	0.18
AK126278	10.25	4.62	7.83	11.36	6.27	11.21	5.36	2.97	9.86	6.78	10.3	9.51	16.92	6.01	13.25	8.22	6.49	1.71	7.38	4.38	5.08	4.11	6.14	11.9
AK126286	1.26	1.29	3.27	2.54	2.08	0.97	0	0	0.55	0.09	0.29	0	0	0	0	0.13	0	0.12	0	2.55	0	0	1.95	0.35
AK126307	4.15	0.85	2.68	0.13	0.82	1.28	2	2.26	0.91	8.9	1.64	1.19	2.4	3.15	3.8	3.55	5.26	2.92	6.73	1.43	9.84	3.88	5.27	7.8
AK126318	17.58	13.11	9.38	4.61	13.39	11.25	9.14	10.46	17.96	34.25	29.02	16.2	70.15	9.93	26.57	22.18	18.27	9.34	14.75	30.01	22.54	21.22	16.84	14.87
AK126334	0	0	0	0	0	0	0	0	0	0	0	0	0	0	0	0	0	0	0	0	0	0	0	0
AK126351	0	0	0.33	1.26	0.47	0.35	0	0	3.27	1.18	0.6	0.58	2.13	2.62	1.2	0.53	1.6	0.08	0.73	0.65	1.59	0	0.42	0.24
AK126532	0	4.24	0	0	0	3.36	0	0	0	0.3	0	9.2	0	13.49	0	3.4	0	7	3.88	0	0	0	0	0
AK126539	3.89	6.91	4.36	3.23	3.57	2.51	0.06	0	0	0	0	0	0.12	0.25	0.09	0	0	0	0	0.11	0	0	0	0
AK126616	0.15	3.89	1.03	0.26	0.27	0.72	1.61	2.11	0	1.29	1.74	16.86	5.55	20.62	9.18	1.54	9	11.48	16.88	5.64	17.38	6.16	1.82	10.47
AK126635	13.53	9.51	14.05	9.57	6.34	6.35	1.78	0.25	0.29	2.14	2.25	8.47	13.45	10.3	2.04	7.2	1.21	5.46	4.9	3.38	7.2	1.6	0.95	0.7
AK126693	0.67	3.53	2.13	1.28	1.63	1.48	0	0.65	0	0.25	0.28	6.48	1.65	9.97	0.3	0.75	0.53	4.08	8.96	2.52	10.41	3.77	0.66	1.25
AK126717	0	0.36	0	0.17	0	0	0	0	0	0	0.88	0	1.4	0.94	0	1.16	0	0	0.63	0	4.38	0	0	0.53
AK126744	0	0.31	0.47	2.28	0.47	0	0	0	0	0.9	0	0.74	0.54	0.55	0	0.22	0	0	0.37	0.23	0	0.15	0	0
AK126852	0.45	0	1.4	0.36	9.04	0	1.42	0	0	0.07	0	1.7	0.5	1.54	1.77	0	0.36	0.95	0.51	0	1.4	0	0.1	0
AK127026	7.82	13.78	23.82	15.6	13.21	18.96	19.68	11.72	12.54	18.21	17.52	19.41	24.16	13.17	19.8	16.81	15.43	9.32	9	15.91	14.35	12.23	16.12	20.51
AK127048	17.81	13.53	20.46	9.09	11.63	35.59	0.76	0.81	0.34	0.97	3.06	0.66	1.15	0.79	0.34	0.4	1.59	0.51	0.39	0.17	0.36	0.32	0	0.11
AK127087	5.43	8.44	12.25	12.67	8.82	9.54	13.03	11.24	15.07	17.64	16.46	23.18	46.62	21.86	32.03	20.79	19.16	11.53	14.69	14.76	12.78	37.54	35.01	58.47
AK127120	0	0	0.3	0	0	0	0	0	0	0.32	0	0	0	0	0	0	0.21	0	0	0	0.18	0	0	0
AK127124	0	0	0.12	0	0.53	0	0	0	0	0.34	0.57	2.05	0.6	1.23	0	1.26	0	2.06	2.05	0.79	2.27	1.34	0.72	0.34
AK127179	1.42	2.92	7.19	3.85	3.16	3.26	0	0.56	0.26	2.27	3.02	5.85	2.38	5.37	0.19	2.04	2.74	2.39	5.74	1.6	6.05	4.77	1.69	4.24
AK127183	1.36	1.3	3.25	0.46	0.09	4.5	0.39	0.44	0.19	2.62	1.47	2.56	5.48	3.22	0.44	3.13	1.01	0.83	4.71	1.36	5	0.87	2.72	0.35
AK127190	21.51	31.78	41.34	33.04	28.06	19.28	3.1	0.79	0	1.33	3.06	1.54	2.38	3.87	1.78	4.91	0.99	3.25	3.09	2.84	7.53	1.81	6.34	6.54
AK127191	2.03	1.9	4.06	2.58	2.95	1.52	0.07	0	0	0.25	0.28	2.03	0.75	0.92	2.01	0.5	0.64	5	6.11	1.95	7	3.31	3.41	4.05
AK127224	0	0.49	1.04	0.03	0	0.94	0	0	0	0.54	1.09	1.59	0.48	1.78	0.61	0.4	0	0.77	1.19	0	1.09	1.28	0.08	0.87
AK127270	6.86	9.97	13.54	9.51	17.91	7.79	0	0	0	0	0	0.15	0.21	0.22	0.08	0.18	0.08	0	0.15	0	0	0.24	0	0
AK127339	3.64	1.21	0.44	1.05	0.08	0.19	0.8	0.13	0.85	0.45	1.34	3.66	3.04	5.16	1.4	0.97	1.35	2.59	1.84	0.78	0.84	0	0.49	0.41
AK127380	0.33	0.31	0.67	0.3	0.44	0.19	0	0	0	0.7	0.47	0.34	0	0	0	0	0	0	0	0	0	0	0	0
AK127400	0.34	0.61	0.92	0.8	0.73	0.14	0	0	0.47	0	0	0	0	0	0	0	0	0	0	0	0	0.22	0	0.23
AK127443	2.19	14.49	13.6	10.38	9.45	12.94	9.41	12.9	22.05	20.29	44.93	38.06	49.45	24.93	7.77	24.99	36.29	9.94	18.86	20.62	14.6	12.07	9.34	15.24
AK127472	0.26	0.69	1.19	0.52	0.28	0.57	0	0	0	0	0	0.17	0	0.75	0	0	0.17	0	0.83	0	1.36	0	0.1	0
AK127555	2.26	2.54	5.08	9.14	2.85	5.67	5.54	5.37	1.48	13.65	7.26	4.53	11.05	5.97	5.78	10.25	5.76	1.47	1.89	5.41	3.37	2.76	4.26	5.95
AK127557	0.09	0.11	0.32	0.35	0.12	0.6	0	0.1	0	0.31	0	0.38	0.42	0.28	0.1	0.23	0.1	0	0.38	0	0	0.15	0	0
AK127609	1.42	0.1	0.97	1.03	0.22	0.37	2.27	0	0	0.66	0.78	0.59	1.67	4.85	2.51	1.04	0.45	0.33	0.28	0.54	3.13	0.23	0.66	1.53
AK127697	3.55	6.18	7.17	6.14	6.64	2.06	0	0	0	0	0	0	0	0	0	0.12	0.11	0	0	0	0	0	0	0
AK127787	0	0	0	0.15	0	0	0	0	0.38	0	0	0	0	0.65	0	0	0	0.16	0.15	0.09	0	0.12	0.17	0
AK127846	0.72	0.67	1.34	0.9	0.66	0.81	0	0.04	0	0.48	0.2	0.29	0.22	0.22	0.08	1.16	0.54	0.16	0.15	0	0	0.08	0	0.72
AK127963	0.15	0.2	0.75	0.28	0.22	0.09	0.22	0	0	0	0	0	0.23	0	0.8	0	0	0.34	0.61	0	0	0	0	0
AK127966	2.3	2.8	9.21	3.74	7.76	1.25	0.87	1.67	3.77	2.36	2.31	33.59	6.51	50.96	4.37	1.76	2.66	23.71	53.13	3.06	27.43	6.45	6.53	11.17
AK127969	0.04	0.13	0	0.01	0.42	0	0	0	0	0	0	0	0	0	0	0	0	0	0	0	0	0.15	0.11	0
AK127974	0	0	0.07	0	0	0	0	0	0	0	0	0.32	0	0	0	0.16	0.13	0	0	0	0	0	0.15	0.21
AK128013	9.59	1.99	0.43	1.6	1.66	0.08	0.22	0.08	0	0.25	0	0.3	1.56	0.91	0	0.74	0	0.34	2.43	0.19	0.84	0	0.35	0
AK128059	0	0.04	0.08	0	0	0	0	0	0	0.94	0	0.14	0	0	0	0	0.14	0	0	0	0	0	0	0
AK128153	5.81	4.17	1.96	4.07	15.26	0.81	11.08	10.86	28.7	12.98	8.38	13.37	4.17	5.21	14.07	1.99	2.89	6.24	2.72	1.95	1.96	2.65	2.12	2.37
AK128202	0	0	0	0	0	0	0	0	0	0	0	0.17	0	0	0	0	0	0	0	0	0.23	0	0	0
AK128252	2.21	0	0.23	0	0	0	3.54	1.04	3.48	1.17	1.6	4.2	4.26	5.24	4.32	2.12	1.08	4.46	6.45	1.63	5.2	3.09	2.38	5.88
AK128346	0	9.8	14.36	1.81	1.1	9.38	0.62	7.51	1.49	14.04	14.16	8.07	37.79	11.45	25.09	9.95	15.87	11.61	2.11	17.27	19.04	17.42	11.04	17.35
AK128361	0	0	2.25	0	0	0	0	0.22	0.92	0	0	1.75	0.62	1.02	0.48	0	0.52	0	2.5	0	0	0	0	0
AK128400	2.61	2.93	6.27	2.18	9.8	3.12	4.55	1.51	2.04	0.66	4.66	3.1	2.49	4.89	4.22	3.91	1.51	0.99	2.66	1.69	4.66	0.72	1.11	3.79
AK128414	0.04	0.16	1.03	0.22	0	0.1	0.07	0	0	0.37	0	1.65	0.27	2.21	0.1	0.22	0.19	0.51	1.1	0	1.76	0	0	0
AK128439	0.28	2.92	0	0.42	0.63	3.58	0.45	0.05	0.54	1.39	2.04	7.26	0.83	6.7	0.45	0.27	0.12	2.97	3.13	0.95	2.7	2.32	1.22	2.67
AK128486	0	0	0.1	0	0	0	0	0	0	0	0	0.37	0	0	0	0	1.56	0.21	0	0	0	0	0.21	0
AK128534	1.49	2.72	5	3.8	3.07	2.66	0	0	0	0	0	0.32	0.24	0	0	0	0	0.54	0.32	0	0	0	0	0
AK128559	30.58	44.46	55.83	41.03	42.06	26.28	1.7	0.76	4.08	4.48	6.21	3.13	10.69	3.14	9.4	5.31	6.41	1.55	4.18	5.54	2.87	6.08	7.34	9.09
AK128563	3.38	0.42	0	0	0.66	0	0.75	0	2.67	0.49	0.68	0.28	0	0.3	0.12	0	0	0.33	0	0.16	0	0.08	0.34	0
AK128569	0	0	0	0	0	0	0	0	0	0	0	0.54	0.44	1.34	0.51	0.79	0.49	0	0.63	0	0	0	0	0.96
AK128593	3.95	6.65	14.59	4.38	4.22	6.15	9.58	10.59	44.46	13.32	7.17	9.04	13.91	4.74	9.18	8.11	9.52	4	4.56	10.11	11.02	8.5	5.08	6.36
AK128619	8.95	0.71	3.3	4.19	1.17	7.58	11.02	10.73	7.89	8.49	20.61	5.14	7.9	6.75	1.23	2.89	4.92	1.69	4.62	2.26	8.32	3.21	2.66	5.02
AK128652	0	0	0	0	0	0	0	0	0	6.42	0	0	0	0	0	0.23	0	0	0	0	0	0	0	0
AK128656	0.8	0.67	1.74	3.62	2.07	2	1.02	2.17	2.23	1.47	10.57	0.77	0.19	1.54	0.13	0.31	1.62	0.14	3.58	0.98	1.41	0.62	0.9	4.25
AK128673	0.92	1.29	1.5	0.85	0.82	0.34	0	0	0	0.07	0	0.36	0.4	0	0.09	0	0.38	0.51	0.18	0	0.75	0	0	0
AK128697	0.29	0.73	4.18	1.36	0.43	4.34	2.04	2.03	0.35	1.54	1.11	5.24	1.08	2.84	6.14	2.46	1.41	3.83	4.71	1.2	7.01	1.2	2.56	1.45
AK128707	0.29	0.29	0.44	0.49	0.35	0.1	0	0.23	7.53	0.99	2.45	0.13	0	0.19	0	0	0.27	0.07	0	0.08	0	0	0.07	0
AK128708	1.21	0.69	0.89	0.58	2.31	0.18	2.76	1.3	2.61	2.31	0.79	1.5	1.61	1.57	1.8	1.97	0.3	0.71	3.36	0.66	3.17	3.38	4.74	2.97
AK128734	6	3.25	9.69	4.45	7.33	2.52	5.29	2.48	17.7	14.58	17.81	8.46	42.8	3.29	17.4	30.73	6.21	3.9	2.72	6.43	4.86	6.2	20.94	4.63
AK128777	0.05	0	0.34	0.37	0	1.43	1.52	0.15	0.1	0.65	0.81	9.04	0.43	7.64	0.1	0.81	0.31	2.36	4.73	0.13	4.63	0	0	0
AK128833	1.02	2.72	4.77	1.22	3.7	3.6	1.64	0.73	0.58	1.77	2.52	1.34	2.08	1.76	0.35	0.1	0.09	0.47	0.84	0.11	0.46	0.41	0	0
AK128837	0	2.3	0	0	0	0	0	0	0	0	0	1.52	0	0	1.1	0	0	0	0	0	1.6	0	0	0
AK128880	0	0	0.39	0	0	0	0.4	0	4.88	0	0	0	0	0	0	0	0	0	0	0	0	0	0	0
AK129567	0.15	0	0.26	0	0	0.35	0	0	0	0	1.33	0.42	0.82	0.48	0.3	0.97	0	0.54	0.96	1.61	0	0	0	0.27
AK129672	10.83	14.95	19.16	13.05	24.74	10.66	0.47	0.56	0	2.59	0	0	0.48	1.88	0.2	0.43	0.44	0.47	1.5	0.44	2.28	2.14	2.3	2.52
AK129879	2.98	0	0.48	0.76	1.67	0	0	2.21	12.27	0.38	0	0	1.24	0	0.47	0	0.34	0	0.27	3.71	0	1.19	0	3.92
AK129926	0	0	0	1.51	0	0	0	0	0	0	0	0.71	0.53	0	0	0	0	0	3.58	1.39	0	0	0	0
AK130076	3.4	11.4	9.14	9.22	8.37	4.13	8.49	7.82	15.72	5.71	8.42	10.44	15.28	5.58	10.95	8.88	17.43	4.14	7.76	8.71	15.35	15.12	4.98	12.93
AK130294	9.03	15.9	16.89	14.17	14.63	15.65	12.28	15.73	9.93	22.42	16.48	29.08	8.2	50.48	10.15	13.57	13.94	18.45	38.85	6.14	78.71	12.11	12.67	20.37
AK130329	5.59	11.22	10.11	5.74	7.39	6.41	15.54	9.97	3.47	8.54	9.19	5.7	34.82	7.09	3.18	8.26	8.84	2.71	9.71	25.77	13.11	26.62	27.52	24.11
AK130400	0.07	0.08	0.24	0.45	0	0.07	0	0	0	0	0	0	0	0	0	0	0	0	0	0.16	0.35	0	0	0.42
AK130481	13.41	14.67	28.22	17.53	16.98	9.87	0.24	0	2.81	0.54	0	7.07	6.21	7.36	4.23	1.16	1.91	3.2	15.14	4.87	11.32	2.64	4.15	4.69
AK130486	0.99	2.82	5.4	1.56	3.87	0.99	15.53	13.84	1.74	3.15	5.1	5.4	8.56	11.13	6.52	7.83	8.56	2.22	5.13	4	3.53	5.79	5.77	4.73
AK130765	0	0.08	0	0.24	0	0	0	0	14.02	0.37	0	0.59	1.09	1.34	0.62	0	0	0.17	0.6	0	1.23	0.24	0.17	0.49
AK130824	0.97	4.69	5.22	2.88	2.23	4.72	11.65	11.49	2.98	6.13	18.26	9.2	15.21	8.38	2.67	5.23	2.59	2.63	1.93	14.88	0	6.72	0	3.91
AK130852	0	0	0	0	0	0.11	0	0	0	0	0	0	0	0	0	0	0	0	0	0	0	0	0	0
AK130904	0	0.74	0.43	0	0	0	0	0.35	0.13	0.06	0	0.15	0	0	0	0	0	0.17	0	0.29	0	0	0	0
AK130911	0.18	0.11	8.23	0.6	2.79	0.4	0.41	0.58	0.33	1.24	5.22	7.53	3.6	14.17	3.74	0.69	0.8	3.36	15.09	3.86	30.19	7.08	3.06	2.83
AK131020	18.22	1.36	5.88	0.84	0	0	0	1.72	7.36	3.42	0	0	0	4.76	1.71	0	0	3.55	3.2	0	0	0	0.95	0
AK131021	0	0	0	0	0	0	0	0	0	0	0	1.15	0	0	0	0	0	0	0	0	0	0	0	0
AK131224	0	0	0	0	0	0	0	0	0	0	0	0	0	0	0	0	0	0	0	0	0	0	0	0
AK131325	0	0	0	0	0	0	0	0	0	0	0	0	0	0.29	0.3	0	0.31	0	0	0	0	0	0	0
AK131347	1.61	2.84	3.36	2.57	2.75	1.16	0	0	0	0	0	0	0.16	0	2.25	0	0	0	0	0	0.6	0.18	0.13	0.36
AK131516	0	0	0	0	0	0	0	0	0	0	0	0	0	0	0	0	0	0	0	0	0	0	0	0
AK131520	12.28	12.22	18.86	9.68	10.64	8.01	0	0.07	0	0.24	0.79	0.29	0.63	0.43	0	0.53	2.74	0	0	0.18	0.4	0.23	0.17	0.96
AK172755	0	0	0.04	0	0	0	0	0	0.33	0.81	0	0.12	0	0	0	0	0.33	0.07	0.5	0.16	0.34	0	0.07	0.21
AK2	73.38	45.6	84.95	68.45	66.79	74.1	79.03	110.16	123.19	117.16	116.09	103.63	125.08	88.77	119.34	143.89	119.61	34.75	91.55	96.06	106.19	97.52	123.17	152.17
AK289390	18.72	18	14.84	14.52	20.52	20.74	9.3	25.2	8.5	26.46	28.55	5.61	14.48	3.67	11.42	5.66	6.88	7.35	3.91	14.16	9.06	13.3	19.35	10.33
AK291164	0	0	0.77	0	0	0	0	0	0	0	0	0	0	0	0	0	0	0	0	0	0	0	0	0
AK291611	0	0	0.46	0	0.17	0	1.79	0	0	0	0	0	0	0	0	0	0	0	0	0	0.75	0	0	0
AK291701	2.18	3.58	3.9	2.69	4.59	2.23	0.14	0	0	0	0	0.69	0	0	0.2	1.42	0.2	0.43	0	0.25	0	0.31	0.89	0.52
AK293020	0	0	0	0	0	0	0	0.47	0	0	0	0	0	0	0	0	0	0	0	0	0	0	0	0
AK293147	42.63	33.63	87.31	131.1	0	0	17.76	18.59	0	9.03	0	27.68	0	19.19	0	0	0	18.01	0	0	0	0	0	0
AK294004	0	0	7.37	0	17.49	0	0	0	0	0.67	2.82	0	1.63	3.21	5.73	2.61	0	0	0	4.16	0	2.89	2.67	4.53
AK294743	0	0.04	3.69	0.25	0	0	0.57	0.4	0	1.47	0.21	0.63	1.03	0.71	0	0.19	0.25	0.67	0.47	0.2	0.43	0.25	0	0.39
AK294819	0	0	0	0	0	0	0	0	0	0	0	0	0	0	0	0	0	0	0	0.61	0	0	0	0
AK294973	0	0	0	0	0	0	0	0	0	0	0	0.37	0.55	0.56	0	0.23	0	0	0	0	0	0	0	0
AK295617	0	0	0	0	0	0	0	0	0	0	0	1.99	0	1.14	0	0	0.54	0	0	0	3.09	0	0.43	2.23
AK295707	2.59	0	0	0	0	8.65	0	0	0	0	0	0	0.52	0	0	0	0	0	2.84	0	0	1.49	0	0
AK296065	4.59	30.83	13.34	10.77	5.67	30.14	5.7	0	0	6.86	1.84	2.72	7.32	6.89	1.72	4.03	0.92	2.6	2.22	0	0	1.3	0.63	6.35
AK296146	0.96	0	0	0	8.48	2.58	6.97	8.04	0	0.82	4.24	5.42	2.93	3.14	3.11	1.6	0	1.12	1.08	0	0	8.16	5.81	3.33
AK296148	0	0	0	0	0	0	0	0	0	0	0	0	0	0.77	1.34	0	0.27	0.29	0	0	0	0	0	0
AK296276	0.25	0	0	0	0	0	0	6.24	0.94	0.44	3.72	1.6	3.55	5.61	0	0.66	0.28	0.3	1.6	1.37	2.22	0	0.93	0
AK296947	4.23	1.59	3.81	2.17	7.04	0	0	1.14	0.97	2.04	2.29	1.09	0.81	0.82	1.15	0	0	0.61	1.64	1.06	3.04	0.45	0.96	1.37
AK297683	0	0	0	0	0	0	0	3.56	0.87	2.43	1.36	0	0	0	0.51	0	0	0	0	0	0	0	0	0
AK297919	11.56	21.11	18.78	8.72	13.4	21.14	16.05	10.71	29.6	17.4	16.28	19.1	15.89	13.11	18.3	14.79	15.59	7.37	9.57	14.9	18.2	16.72	17.1	24.54
AK298056	66.16	1.8	2.5	27.37	0.51	0	0	0	3.92	3.3	0	0	9.45	0.01	2.5	1.04	0.51	0	0	3.89	0	5.64	3.59	5.36
AK298300	92.95	140.29	233.81	184.66	177.07	134.74	1.13	0.81	1.37	5.12	13.14	0	5.78	6.62	3.17	5.15	2.43	0.82	2.96	4.88	6.36	8.69	8.09	3.48
AK298596	0.03	0.89	0.15	0	0	0	0.18	0	1.78	0	0	0.5	0	1.51	0	0	0	0.84	0	0	0	0	0	0.84
AK299432	0	4.7	0.38	0.71	7.33	0.36	0.51	1.43	3.67	2.85	1.92	1.34	5.06	4	2.15	5.03	1.46	0	4.02	3.53	5.71	8.97	7.14	12.57
AK299452	8.49	0	0.18	0.86	0	1.21	1.67	2.54	0.58	3.77	2.72	5.19	0	6.82	0.68	0	0.35	0.72	3.9	0.84	6.33	1.6	3.79	2.18
AK299501	1.95	2.56	3.7	3.77	8.13	4.7	2.96	2.93	3.91	6.67	4.49	8.5	25.05	14.85	14.39	4.47	4.51	14.8	20.37	16.62	25.76	14.23	9.65	13.51
AK3	14.86	22.17	24.11	12.64	10.37	25.11	39.47	29.88	15.23	29.27	30.97	19.15	34.64	16.12	30.61	27.03	26.95	9.37	9.39	24.81	26.95	34.21	28.2	33.6
AK300387	1.8	0.49	3.16	1.63	1.28	2.79	0	0	0.44	0.2	0	0.99	0.37	2.24	0.26	0.91	0	0.28	1.49	0.64	0	0	0.29	2.9
AK300656	3.17	0.87	1.44	1.78	17.31	0.49	0.22	3.73	0	2.23	0	2.99	6.63	4.49	14.42	3.68	5.42	2.66	2.99	1.93	4.99	2.45	7.32	7.01
AK301093	0	0	4.78	2.71	0	0	2.3	0.19	0	0.26	0	2.5	8.32	3.75	5.35	3.17	2.47	2.44	3.75	0.81	6.95	3.08	5.1	4.37
AK301549	0	0	34.77	0	0	0	0	0	0	0	1.19	1.69	0	1.27	0	0	0	0.47	0.85	0	0	0	0	0
AK301666	3.53	71.49	40.27	76.23	106.61	208.47	2.36	15.47	24.74	18.42	0	28.61	13.13	64.34	14.18	5.36	1.07	9.81	43.47	0	0	24.01	43.48	86.29
AK301968	0	0	0	5.58	0	44.48	3.12	13.67	0.53	25.8	12.15	4.1	32.94	0	33.53	14.46	0	5.37	4.77	20.64	0	15.93	9.33	8.27
AK302092	0	0	0	0	0	7.82	0.64	0.38	2.45	0.34	0	0	2.76	0	4.75	2.08	0	2.01	0	3.64	2.02	8.6	2.2	7.74
AK302306	0	0	0	0	0	0	0	0	0	0	0	0.7	0	0	0	0	0	0	1.43	0	0.76	0	0	0
AK302451	0	0	0	0	0	0	0	0	0	0	0	0	0	0.56	0	0.23	0	0	0.38	0	0	0	0	0
AK302511	33.58	126.6	28.96	82.22	24.79	5.77	0	5.48	15.21	1.11	9.18	75.59	22.67	27.94	22.81	3.1	6.22	68.7	8.5	19.12	24.88	14.3	2.18	23.41
AK302545	0	0	0	0	0	0	0	0	0	0	0	0	0	0	0	0	0	0	0	0	0	0	0	0
AK302694	0	0	0	0.1	0	0	0	0	0	0	0	0	0.26	0	0	0.22	0	0	0	0	0	0	0	0
AK302879	0.24	0	0	0	0	0	0	0	0	0	0	0	0	0	0	0	0	0	0	0	0	0	0	0
AK303207	0	0.27	0	1.03	0	0.33	0.51	3	0	0	0	0	2.01	0.46	0.67	0	0	0	0.54	0	0	0	0	0
AK303572	154.19	154.72	376.49	247.44	195.66	271.23	178.26	112.11	277.99	187.24	199.54	91.73	366.35	104.96	178.21	163.71	194.12	55.42	127.33	120.03	144.84	109.63	156.42	192.78
AK303607	0	0	0	0	0	0	0	0	0	0	0	280.2	0	264.77	0.54	1.43	0	161.05	216.08	0	518.51	0	0	0
AK304483	0	0	0	0	0	0	0	0	0	0	0	0	0	0	0	0	0	0	0	0	0	0.57	0	0
AK304759	0	0	11.53	7.68	19.86	0	0	4.08	0	5.4	7.34	22.09	9.52	39.94	0	7.86	8.31	6.8	9.81	9.97	14.38	4.21	2.97	2.14
AK304826	0.29	3.34	6.79	6.27	9.92	2.99	5.17	7.95	7.46	8	6.86	37.71	6.78	77.35	4.81	2.67	3.41	32.68	43.54	5.07	5.44	8.79	5.82	9.41
AK307172	3.88	15.72	2.69	0.24	1.63	0	0	0	0	0	1.36	0	0	0	0	0	0	0	1.78	0.58	0	0	0	0
AK307192	0.7	28.3	0	2.32	7.16	0	0	0	0	0	0	0	0	0	0	0	0	0	0	0	0	0	0	0
AK307207	0	0.92	0	0.28	0.17	0	0	0	0	0	0	0	0	0	0	0	0	0	1.62	0	1.49	0	0.31	0
AK307246	1.66	2.48	0	0	0	0	0	0	0	0	0	0.44	0	0	0	0	0	0	0	0	0	0	0	0
AK307275	0	4.96	0	0	15.68	0	0.5	0	4.28	1.23	0	0	0	0	0	0	0	0	1.87	0	0	0	0	0
AK307870	8.29	13.85	13.34	3.88	0	14.41	12.66	11.33	10.7	9.72	9.26	8.5	30.56	13.88	22.54	7.62	14.8	8.84	21.14	23.46	56.98	24.19	16.4	40.87
AK308309	0	0.49	0.85	2.53	0.79	0	0.28	0.14	0	0.84	0	1.39	0.04	1.91	0	0	0	0	0	0.89	0	0	0	0
AK308439	0	0	0	0	0	20.38	4.16	4.69	0	5.32	2.41	3.18	5.02	2.92	3.81	1.6	0.64	1.62	4.23	4.7	0	6.88	0	7.53
AK308544	0	0	0	0	0	0	0	0	0	0	0	0	0	0	0	0	0	0	0	0	0	0	0	0
AK308561	2.73	0.62	8.11	18.73	3.16	56.13	2.35	57.32	2.07	38.01	14.07	3.96	25.1	11.19	15.42	7.39	3.73	3.74	7.03	2.68	13.46	14.97	5.64	7.29
AK308605	0	0.26	1.44	0.47	0.23	0	0	0	1.99	0	0	0.7	0	0.73	0	0	0	9.83	27.49	0	26.3	2.66	0.77	1.68
AK308652	0	5.2	0.86	0	0.91	1.43	7.29	0	0	3.73	7.57	22.55	1.32	38.71	0	0	0.96	4.81	8.67	0	14.94	1.46	3.1	2.98
AK308704	4.84	7.89	6.49	6.5	4.84	2.17	0.68	1.91	0	2.3	4.53	3.67	3.22	4.07	2.93	1	0	3.59	1.63	0.7	4.1	1.59	1.81	0
AK308867	1.12	7.82	3.31	1.97	6.05	1.39	1.75	15.11	12.63	7.3	2.45	18.66	6.3	38.58	5.65	3.12	2.54	4.96	29.85	3.3	20.41	17.2	13.38	12.81
AK308944	2.12	2.64	3.01	2.18	1.69	1.66	0	0	0	0	0	0	0.45	0.46	0	1.86	0.48	0.17	0	0	0	0	0	0
AK308965	49.76	60.89	92.49	57.71	78.55	42.08	0.26	0.18	0.62	1.75	4.92	1.4	3.13	1.05	6.65	5.64	0	1.96	2.11	4.09	1.96	1.74	3.28	1.77
AK309109	0	0.01	0.01	0	0	0.01	0	0	0	0	0.03	0.01	0.05	0.06	0	0	0	0	0	0	0.01	0	0	0
AK309215	0	0	8.52	0.99	0	0.13	1.06	2.37	14.41	4.37	8.57	10.61	6.39	8.09	4.28	0	3	9.34	6.46	0.83	17.93	1.97	1.98	2.23
AK309255	2.85	0.41	10.24	12.44	26.62	1.92	1.85	9.79	1.22	8.27	15.87	7.26	1.7	14.61	5.45	2	3.45	8.59	10.83	9.34	20.65	4.41	12.81	15.62
AK309441	0	0	5.62	0.75	0	0	0	0	0.65	0	1.31	0	0	0	0	0	0	0	0	0	0.64	0	0	0
AK309476	0	1.13	0	0	0.25	0	0	0	0	0.61	0	0.7	0	1.93	0	0	0	2.64	3.79	0.42	7.49	0	0	0
AK309533	0.31	0.85	0	0.22	0	0	0	0	0	0	0	0	0.65	2.92	0.31	0	0	0	1.76	0	0	0	0	0
AK309717	4.46	6	8.67	7.11	14.12	7	0	0	0	0.22	0	0.46	1.2	0	0	0.24	0	0.3	0	0	0	0	0.43	0
AK309744	0	0.46	0	0.68	0.16	0	0	0	0	0.22	0	0	0	0.8	0	0	0	0	0	0	1.47	0	0	0.44
AK309896	0	0	0	0	0.35	0	0	0	0	0	0	0	0	0	0	0	0	0	0	0.36	0.79	0	0.4	0
AK309922	0	0.17	0	0.45	3.3	0.64	0	0.13	0.44	1.12	1.38	0	0	5.22	2.34	0	0.53	0.31	3.47	1.99	13.69	3.25	2.41	0.83
AK309988	0	0	0	0	0	0	0.22	0	0	5.5	0	0	0	0	0	0.37	0	0	0	0	0.84	0	0	0.51
AK310013	5.14	0	12.69	12	10.06	9.22	4.27	0	0	0	0	0	4.01	1.87	3.2	2.23	0.74	0	0	4.51	0	6.13	1.27	7.96
AK310030	0.34	0.8	1.06	1.27	1.55	0	0	0.14	0.95	5.98	1.49	5.36	3.17	4.83	4.5	0.99	3.42	4.78	6.98	0.69	20.09	2.64	1.87	0.45
AK310041	0.1	0	3.51	0.8	0.47	0.24	0.24	0.39	0	0	0.69	2.61	1.84	5.95	1.61	1.38	0.74	4.6	12.21	0.78	10.84	5.85	1.13	2.35
AK310046	7.33	1.86	30.57	0.84	1.34	2.02	0	3.26	1.51	0.7	0	3.45	10.31	10.19	0	3.18	7.4	0.91	3.27	0	0	3.05	0	1.52
AK310094	0	5.86	0	0	6.71	0	0	0	0	0	0	0	0	0	0	0	0	0	0	0	0	0	0	0
AK310146	0	0	0	0	0	0	0	0	0	0	0	0	0.31	0.97	0	0.79	0.85	0	0	0	0	0	0	0
AK310226	0.25	1.5	3.79	1.97	0	0.27	0.76	12.6	0	3.51	4.27	1.78	5.98	6.81	0.54	4.61	2.71	2.6	2.76	0.61	1.41	0	0	2.26
AK310228	8	12.4	21.57	3.94	10.19	4.56	14.33	9.29	31.23	10.23	11.59	12.21	29.72	34.66	10.53	7.75	11.35	7.59	8.69	10.5	12.17	16.1	11.11	16.15
AK310237	0	0	0	0.04	4.76	0.91	0	0.66	0	0	0	0	0	0	0	0	0.13	0	0.68	1.39	0	0.11	0.71	0
AK310239	6.33	16.52	3.77	0	0	0	2.45	18.62	1.99	5.78	8.67	1.53	7.24	10.99	4.24	1.45	2.26	5.99	7.89	12.95	0.95	1.34	3.74	5.68
AK310350	1.56	4.15	7.44	1.81	2.04	0.56	0	0	0	0	0	0.92	0	0	0	0	0	0	0	0	0	0	0	0
AK310441	0.82	1.47	1.68	3.51	2.62	0.3	0	0	0	0	0	0.53	0.78	0	0	1.62	1.12	0	0	0.34	0	0	0	0
AK310471	0	0	0	0	0	0	0	1.59	0	0	0	0.86	0	0	0	0	0	0	0.07	0	0.07	0	0	0.47
AK310472	17.1	9.98	40.04	9.32	20.78	61.69	22.63	26.88	38.12	35.71	36.46	0	50.95	0	72.34	16.95	28.73	0	0	49.53	0	68.82	52.81	89.45
AK310493	0	0.29	0	0	1.01	0	0	0	0.43	0	0	0.49	0.72	1.47	0	0.3	0	0.54	0	0.31	0	0.4	0.28	0
AK310526	0	0	0.19	0.09	1.38	0	0	0	0.25	0	0	0	0.53	0.91	0	0.52	0	0	0	0	0	0	0	0.24
AK310634	16.83	34.02	10.97	12.27	8.59	21.7	11.25	8.04	5.77	9.97	14.08	13.79	7.05	25.28	5.94	4.41	6.34	8.03	18.93	5.75	26.47	15.65	13.22	16.22
AK310665	0	0	0.22	0.35	0	3.96	0.19	0.9	0	0	0	0	0.36	0.85	0	0.47	0	0.65	3.36	1.02	6.52	2.23	0.63	0
AK310751	50.64	313.35	62.84	65.42	109.38	19.86	30.37	2.72	7.75	14.08	13.61	24.21	30.28	21.55	14.66	24.2	20.39	18.82	26.37	21.45	0	20.79	20.98	34.25
AK310794	0	3.42	0	0	0	0	0	0	0	0	0	8.28	1.12	2.26	0	0	0.4	0	0	0	1.05	0	1.32	3.8
AK310876	0.34	3.19	1.79	3.91	3.71	0.89	0.17	0	4.61	2.16	0	3.81	3.86	5.01	1	2.05	2.78	3.19	3.34	0.31	2.64	0.78	2.77	3.18
AK311108	6.44	12.73	16.51	13.14	15.52	4.17	0.79	2.61	1.42	2.77	5.04	2.02	7.16	1.97	1.17	3.8	1.53	0	2.24	1.42	6.2	4.48	1.87	4.38
AK311113	190.78	263.47	399.66	233.3	281.44	223.67	95.73	111.62	171.97	224.94	255.94	470.92	412.56	1059.39	196.05	227.4	194.07	146.27	378.28	216.86	463.87	202.92	184.32	150.85
AK311120	0	0	3.78	0.93	0	1.25	2.37	0.12	0.43	0.95	0.73	1.35	3.32	0.77	1.04	4.64	0.75	3.39	2.93	0.38	4.67	3.18	4.01	0.55
AK311131	3.49	19.5	14.24	7.21	8.21	62.69	2.23	3.94	5.8	12.96	14.78	9.11	4.48	22.05	5.83	2.49	9.69	6.21	8.11	7.48	9.82	7.05	6.78	10.15
AK311167	2.63	0	2.52	0	2.41	0	1.36	1.38	0	0	0	0	4.94	0	1.05	0.79	1.03	1.89	5.1	1.45	3.2	3.49	2.78	2.22
AK311212	0	0.27	1.51	0.13	0	0	0	0.5	0	1.2	13.42	0.48	3.21	1.45	1.77	0	1.54	0.54	0	2.79	0.67	0	0.84	0.4
AK311213	7.38	0.15	3.08	11.07	0	7.08	0.37	0.4	0	11.74	4.94	8.61	25.07	16.87	9.57	2.49	7.82	13.2	29.32	27.4	61.15	36.13	26.26	18.24
AK311257	1.06	3.84	1.7	0.4	11.89	2.04	0.37	0.21	1.3	2.42	0	34.74	7.71	41.36	2.6	11.02	2.55	3.94	5.04	1.01	3.01	2.07	0.97	0
AK311282	4.37	7.07	15.28	7.68	10.7	10.18	0.2	2.02	0.47	8.21	4.48	11.91	12.91	5.71	3.81	8.12	3.72	2.27	2.98	3.46	5.6	4.85	3.29	1.13
AK311342	0	0	0.82	0	0	0.15	0	0	0	0	0	0	0	0	0	0	0	0	0	0	0	0	0	0
AK311356	2.89	6.51	7.1	4.72	7.13	2.28	0.79	0.75	5.09	4.46	7.02	3.58	3.19	2.15	8.28	8.39	6.13	3.99	10.74	11.56	7.98	14.73	26.77	23.44
AK311374	0.27	0.32	2.35	1.95	1.93	2.87	1.19	1.81	11.2	4.23	1.83	9.42	1.62	11.97	0.86	1.8	1.89	7.74	12.82	1.91	8.39	0.41	2.16	7.5
AK311380	0	0	0	0	0	0	0	0	0	0	0	2.14	0	0	0	0	0	0	0	0	0	0	0	0
AK311383	0	0	1.01	0	0.16	0.36	0	0	2.17	0	2.05	0	0	0	0	0	0	0	0	0.32	0	0	0	0
AK311445	6.84	12.28	4.87	9.34	7.2	4.33	0	0	0	0	0	1.93	0.72	7.21	0	0	0	0	3.86	0	8.12	0.8	0	0
AK311458	0	0	0	0	0	0	0	0	0	0.35	0	0	0	0	0	0	0	0	0	0	0	0	0	0
AK311558	0	0	0	0	0	0	0	0	0	0	0	1.37	0	0	0	0.86	0	0	0	0	0	0	0	0
AK311573	0.15	6.66	4.65	3.71	0.43	5.04	0	0.1	0	0.46	0	1.49	0.55	1.68	0.42	0.46	0.42	0.62	3.06	0.24	2.05	3.53	0.45	1.89
AK311578	3.31	6.72	21.48	9.28	15.41	3.87	36.14	17.05	7.51	22.36	17.78	5.46	7.18	4.55	2.23	0	1.62	5.41	15.78	5.86	18.55	6.97	7.07	4.57
AK311660	1.27	0.52	2.85	1.42	1.72	0.9	0.44	1.85	1.57	1.23	0.83	8.88	1.31	5.33	0.93	0	1.89	1.98	18.97	2.67	18.11	4.38	0.69	2.98
AK313893	5.91	1.18	9.87	3.72	1.6	8.15	9.22	3.92	3.7	11.42	7	0	16.05	1.24	12.25	3.59	15.14	2.31	0	15.06	2.32	4.79	1.46	4.19
AK316321	0	0	0	0	0	0	0	0	0	0	0	0	0	27.3	0	0	0	0	0	0	12.2	0	0	0
AK4	0.95	2.69	4.1	0.85	0.69	0.18	5.38	1.85	5.17	1.63	5.84	1.96	2.43	1.42	0.75	0.92	0.99	1.89	4.38	2.66	7.94	6.58	3.5	4.72
AK5	1.52	1.79	7.84	2.29	2.45	2.87	2.4	5.06	8.34	7.76	6.83	0.45	4.75	2.81	1.89	1.68	1.68	0.5	2.31	1.75	2.69	3.61	2.77	4.57
AK7	5.54	2.35	1.15	2.72	1.68	5.02	1.45	1.93	0	1.09	8.53	1.32	2.59	1.32	0.23	3.24	2.1	2.2	1.32	6.2	5.47	7.55	4.09	2.2
AK8	0.27	0.65	0.08	0.15	0.18	0.83	0	0.44	0	0.81	0.39	1.41	0.21	1.27	0	0.17	0.75	0.63	1.41	0.9	0.78	0.92	0.16	0.47
AK9	8.87	15.49	15.19	6.27	22.21	11.5	20.86	22.82	33.27	22.1	32.57	8.87	12.47	19.17	11.09	12.93	10.03	7.05	14.11	9.57	28.04	8.62	10.85	9.16
AKAP1	7.96	3.59	5.54	1.89	5.39	10.06	10.98	8.87	11.94	19.68	14.97	17.21	12.78	32.5	22.18	12.3	21.76	13.71	16.61	9.01	30.34	24.5	24.87	29.77
AKAP11	20.83	21.64	27.41	19.95	26.82	33.74	34.96	45.73	61.93	64.38	72.85	34.79	24.5	41.97	26.74	18.93	29.84	32.47	30.02	34.49	93.09	56.36	54.11	63.86
AKAP12	2.37	7.05	33.33	5.26	9.6	22.51	9.43	16.28	61.85	18.45	34.45	35.15	23.47	7.91	24.18	17.97	18.91	4.6	3.05	7.67	8.67	14.43	7.09	11.81
AKAP13	5.78	22.56	12.44	10.84	30.8	35.85	35.85	7.63	11.2	23.97	35.92	25.12	62.84	27.59	15	24.22	31.28	17.8	12.78	35.79	34.19	19.88	25.03	13.31
AKAP14	0	0	0	0	0	0	0	0	0	0	0	0	0	0	0	0	0.5	0	0	0	0	0	0	0
AKAP17A	14.28	12.11	17.84	12.98	16.83	20.74	15.07	11.59	16.02	17.41	19.67	22.76	34.17	34.77	14.87	9.78	19.34	12.41	44.75	30.58	40.37	26.85	31.13	44.98
AKAP2	6.63	1.89	4.17	9.15	2.03	0	6.05	5.99	9.92	6.86	5.15	40.99	12	17.43	19.38	15.37	16.1	31.44	34.61	32.88	64.27	40.28	43.66	36.1
AKAP3	0.05	0	1.6	0	0	0	0	6.25	0.34	0.16	3.75	1.95	0.86	2.93	3.24	1.55	1.85	2.17	1.95	2.24	5.89	3.48	2.7	6.14
AKAP4	0	0	0	0	0	0	0	0	0	0	0	0	0	0.52	0	0	0	0	0	0	0.48	0	0	0
AKAP5	3.58	3.25	4.84	3	2.95	2.88	1.08	1	2.07	0.7	6.51	3.62	5.54	1.91	1.41	5.14	1.52	1.29	2.99	2.13	2.98	2.5	1.67	2.17
AKAP6	2.51	4.8	4.84	2.61	4.14	5.4	4.19	6.52	15.2	8.26	7.14	13.39	16.36	7.87	11.03	5.6	4.08	12.98	12.58	7.15	24.84	12.91	10.39	15.54
AKAP7	0.06	0	0.4	0.32	1.2	0	0	5.81	2.52	0.49	5.3	0.96	3.35	1.45	0.75	0.59	0.38	1.21	1.21	1.38	4.31	1.96	1.95	2.6
AKAP8	14.11	43.18	26.08	27.64	35.65	31.15	13.71	29.47	17.02	29.32	32.91	42.02	68.46	29.36	40.1	26.27	32.44	24.54	14.91	35.83	29.61	40.94	34.72	30.98
AKAP8L	59.66	50.3	54.11	22.69	25.34	81.18	19.74	24.22	32.68	37.49	43.14	75.36	38.66	69.42	41.7	27.53	21.67	66.01	54.66	31.01	116.23	47.3	33.94	41.81
AKAP9	45.59	60.01	67.98	55.44	42.21	123.28	60.49	73.41	139.92	143.56	119.47	69.23	84.36	58.83	76.08	63.75	67.57	35.82	59.32	84.96	149.18	61.81	65.2	81.19
AKIP1	25.74	31.05	42.22	28.23	30.01	18.74	29.44	16.79	17.34	13.21	26.25	11.12	16.73	9.38	31.85	21.82	27.16	4.83	5.66	24.2	16.45	48.46	47.51	54.04
AKIRIN1	41.22	33.74	36.15	26.73	49.18	50.41	102.09	80.91	76.42	97.98	135.39	61.27	183.03	48.08	54.32	52.33	54.89	15.51	16.1	89.32	31.37	68.74	55.34	74.26
AKIRIN2	12.67	15.86	31.37	35.37	18.84	26.63	26.03	28.35	53.08	20.86	35.32	38.82	21.05	32	10.6	15.85	14.01	22	16.67	16.75	23.8	21.61	11.79	17.7
AKNA	7.34	35.85	8.9	18.56	17.26	1.23	5.46	2.17	1.39	5.74	4.17	3.93	11.38	12.44	5.04	2.22	3.58	2.64	1.29	2.74	3.62	4.63	6.85	5.82
AKR1A1	11.1	17.52	47.57	37.41	22.81	31.5	68.95	70.45	104.13	59.52	62.94	36.43	24.68	24.2	57.33	27.31	61.01	29.62	11.92	45.22	28.91	67.07	55.56	72.42
AKR1B1	18.76	15.37	37.95	12	12.15	50.65	68.25	64.39	26.39	47.37	79.15	30.45	49.95	18.06	80.51	45.03	78.06	21.77	12.89	47.62	27.31	88.42	82.05	106.71
AKR1B10	0.89	1.2	2.61	1.83	2.04	1.4	0	0	0	0	0	0	0	0	0.2	0.23	1.59	0.84	0	0.24	1.04	1.84	3.26	0.62
AKR1B15	0	0	0	0.1	0	0	0	0	0	0	0	0	0	0	0	0	0.19	0	0	0	0	0	0	0
AKR1C1	3.99	10.13	13.21	7.91	23.96	15.54	5.08	4.17	0.5	9.51	7.14	2.04	4.64	0.67	13.67	3.69	3.66	3.17	1.59	2.17	9.74	71.03	60.64	30.5
AKR1C2	3.47	1.73	3.83	3.29	1.23	3.95	1.18	2.76	2.41	3.09	2.35	0.95	0.87	0.36	4.22	0.13	0.11	0.49	0.57	2.18	3	12.3	27.83	4.32
AKR1C3	1.62	0	1.88	2.84	0.41	4.73	8.46	7.29	0	0	0	0	1.48	2.17	6.99	8.33	2.93	0.63	2.08	5.16	4.36	7.17	42.5	6.54
AKR1C4	0	0	0	0	0	0	0	0	0	0	0	0	0	0	0	0.31	0	0	0	0	0	0	0	0
AKR1C6P	0.36	1.23	0.93	1.28	0.85	0.56	0	0	0	0	0.6	0	0	0	0	0	0	0	0.43	0	0	0	0	0
AKR1CL1	0	0	0	0.07	0.09	0	0	0	0	0	0	0	0	0	0.58	0	0	0	0	0	0	0	0.16	0
AKR1D1	1.62	3.88	4.06	3.06	3.95	1.32	0.17	0	0	0	0	1.95	0	0	2.7	5.44	0.53	1.63	0	0.15	2.74	1.2	1.15	0.2
AKR7A2	5.75	7.59	47.75	16.24	19.08	9.22	27.58	47.03	39.61	51.81	40.17	55.04	67.6	37.86	40.29	15.02	36.74	23.05	25.71	45.85	36.82	21.59	25.17	23
AKR7A2P1	0	0	0	0	0	0	0	0	0	0	0	0	0	0	0	0.28	0.24	0	0	0	0	0	0	0
AKR7A3	0	1.85	0.6	0	0	0.66	10.13	0.5	6.83	4.07	4.72	5.58	9.82	3.64	7.93	5.2	2.97	4.51	3.4	12.25	2.69	2.78	0.85	2
AKR7L	0.21	0.44	5.67	1.87	0.19	0.61	0.72	0.36	1.23	2.03	2.71	5.55	12.48	5.49	4.35	1.99	2.44	2.09	2.06	8.73	2.47	5.22	1.95	1.65
AKT1	75.58	79.5	60.63	58.8	65.44	90.96	29.59	34.62	45.47	37.91	24.46	46.23	47.6	82.51	34.5	25.87	26.32	48.34	55.78	49.98	86.71	45.84	49.36	62.79
AKT2	25.92	35.44	76.22	57.44	42.2	41.07	46.79	26.09	50.16	33.19	32.98	37.09	33.37	38.59	37.51	26.31	26.26	29.7	28.34	31.32	38.9	35.19	27.09	41.38
AKT3	37	26.62	31.65	18.73	69.42	43.45	58.14	73.35	47.11	77.24	89.43	39.19	51.91	41.63	36.43	32.08	33.73	32.66	49.72	52.4	176.79	69.19	78.94	111.59
AKTIP	13.07	12.46	9.02	15.71	7.68	4.77	8.76	15.85	3.67	12.26	21.62	18.32	25.64	37.31	21.99	15.9	27.71	17.21	22.26	14.09	45.74	35.37	30.66	54.25
AL049415	3.13	5.88	5.1	1.65	0.18	1.04	7.13	4.06	6.63	0.86	2.96	0	0.4	1.23	0	0	0	0	0	0.17	0.49	0	0	0
AL049935	5.59	6.68	13.35	6.51	14.3	12.18	13.46	22.31	17.79	28.81	25.27	3.06	17.05	7.06	23.42	14.59	20.36	0.69	3.11	9.39	4.08	11.11	16.9	16.01
AL049948	7.26	6.33	4.37	3.66	0.23	1.56	10.41	3.08	4.91	8.19	5.62	7.58	15.47	6.31	16.5	6.81	19.05	5.6	10.55	12.94	21.03	11.99	12.77	13.99
AL050000	6.98	7.1	7.18	9.56	6.34	7.74	2.52	4.64	4.96	8.41	9.37	8.49	7.74	8.19	2.89	3.91	2.93	3.58	6.28	3.37	8.41	4.41	4.59	6.47
AL050085	0.22	0	4.01	0.5	0	0	0	2.98	0	0.79	0	6.61	0.71	7.07	1	2.34	2.54	7.89	2.84	0.61	2.65	0	1.66	0.8
AL050132	0	0	0	0	0	0	0	0	0	0	0	0	0	0	0	0	0	0	0	0	0	0	0	0
AL050141	18.26	44.36	25.48	34.95	57.91	62.63	0	9.17	0	33.42	0	104.09	0	136.13	0	0	10.58	22.58	39.75	9.38	55.5	0	0	0
AL109706	0.11	0.52	1.41	0.16	0.38	0.19	0	0	0	0.19	1.96	0	0	0.71	0.12	0.43	0.12	0.13	0	0.45	0	0	0.27	0
AL109718	0	0	0	0	0	0.34	0	0.27	0	0	1.6	0	0	0	0	0	0.09	0	0	2.78	0	0	0	0
AL109792	11.97	12.32	21.59	15.24	3.16	12.79	17.25	34.62	32.85	56.39	57.24	49.96	26.45	62.36	37.12	34.89	40.62	11.04	27.58	17.82	44.88	9.95	15.35	18.29
AL110171	0	0	0	0	24.61	0	2.82	2.86	14.88	2.04	4.04	0	0.6	1.16	0	0.38	0	1.42	0	0	0.07	0	0	0
AL110181	5.22	3.65	11.49	8.47	7.5	11.59	11.94	7.75	10.64	18.59	8.87	4.73	4.47	4.07	7.93	6.62	7.68	2.07	3.72	13.62	6.53	12.13	10.97	19.41
AL117485	0.25	0.18	0.89	0.49	0.15	0.51	0.97	0	0	0.32	1.1	0.83	1.24	0.73	0	0.42	0	0	0.9	0.46	0.83	0.42	0.09	0
AL122050	45.03	4.76	17.86	8.89	0	18.6	79.06	67.7	5.21	42.25	29.17	0	114.56	0	83.13	88.17	38.85	0	0	88.56	0	62.26	45.61	29.47
AL133568	0.21	0.98	0.6	0.23	0.18	0.09	0	0.07	0	2.01	0.38	1.43	2.81	3.68	0.93	0.84	0.15	0.64	3.03	2.23	1.08	2.69	0.73	1.37
AL137445	0	0	0.65	1.74	0	0	0.79	9.09	0	12.62	4.52	8.5	7.37	5.25	7.97	9.9	6.08	5.5	7.92	9.23	14.58	14.61	9.64	8.64
AL137522	1.24	0	0	2.14	0.18	2	0.16	2.44	6.65	0.91	1.77	4.38	2.6	3.65	0.04	0.35	1.34	0.74	2.73	2.41	3.95	1.54	1.99	6.79
AL137535	4.29	8.44	14.05	9.36	17.62	20.83	19.16	5.75	0	13.3	15.2	86.24	40.67	8.75	33.32	56.56	8.73	20.48	16.85	22.3	22.78	33.42	62.62	18.33
AL137551	0	0.4	0.51	1.94	11.26	0	7.35	0.15	0.86	3.09	0.87	1.65	6.77	3.86	9.68	2.46	3.49	2.78	4.72	7.11	5.33	18.55	17.28	8.36
AL137655	76.64	190.58	63.75	81.24	149.68	21.56	9.17	24.67	89.72	26.47	28.5	70.37	127.22	31.59	108.83	71.99	51.36	52.71	32.59	79.8	37.88	73.38	56.81	79.94
AL137752	0	1.09	0.88	0.12	0	0.58	0.64	0.18	0	1.61	3.9	0	0.26	0.57	0	2.45	0.51	0.72	1.88	0.86	1.52	0	0.62	0.29
AL157440	0.12	0.1	1.39	0.05	0.34	4.04	0	0.34	0.29	1.64	0.69	6.48	8.44	2.52	6.25	4.18	1.58	1.58	1.67	1.28	0.69	1.09	2.22	1.66
AL355711	17.71	36.68	23.92	23.21	29.57	54.56	48.69	19.81	24.7	33.42	26.31	32.82	20.26	56.8	15.92	22.72	8.85	21.24	30.9	14.7	31.71	33.2	20.95	25.15
AL357213	7.7	13.52	10.76	15.64	11.63	8.05	3.66	10.43	5.72	9.96	5.35	12.4	21.24	12.98	13.23	10.35	9.71	10.46	14.84	17.65	23.01	13.78	14.95	22.95
AL360260	1.44	5.61	15.34	0.86	8.71	2.24	9.88	2.11	0.51	7.3	2.42	4.38	6.86	9.23	4.56	2.86	4.32	8.63	13.45	9.33	20.93	9.28	3.05	8.5
AL389983	19.57	29.25	41.34	32.43	18.89	25.83	3.95	2.84	5.99	8.73	13.19	1.07	18.44	5.55	9.93	4.21	7.59	6.35	3.05	9.47	2.53	9.45	7.65	9.45
AL390170	0	1.71	0	0.19	0	0	0.65	9.96	7.44	26.78	4.41	8.85	20.05	10.12	19.4	21.27	20.24	2.77	1.06	8.84	5.87	7.23	8.84	5.9
AL831889	57.73	56.95	130.7	71.28	22.77	80.59	99.91	120.86	347.66	197.88	183.49	22.18	53.49	8.46	41.71	33.24	36.51	8.21	2.93	35.86	22.14	38.3	38.1	27.85
AL831948	0	0	0.11	0.53	0	0.05	0	0	0.4	0	1.35	0.4	0	0.3	0	0	0	0.45	0.8	0.13	0	0	0.12	0.17
AL831977	9.51	12.26	12.23	7.36	7.75	13.81	22.88	61.24	19.19	49.52	56.74	116.97	105.63	27.24	41.61	52.16	46.98	9.78	12.08	14.07	9.21	6.99	7.9	30.88
AL832007	2.65	4.76	4.93	3.01	4.72	2.42	0	0.08	0.19	0.36	0.45	0.55	0.56	0.96	0.34	0.07	0.23	0.98	10.7	0.36	9.76	3.96	3.61	4.6
AL832096	0	0	0	0	0	0	0	0	0	0	0	0	0	1.11	0	0	0	0	0	0	0	0	0	0
AL832163	0.21	0.12	0.24	0.61	0.09	0.11	0	1	0.18	0.86	1.16	0	0.46	0.64	0.11	0.13	1.11	0	1.91	0.94	1.16	0.17	0.61	0.18
AL832184	0.73	1	2.4	1.66	1.04	1.72	3.4	0.34	1.59	1.85	1.15	3.37	2.29	1.25	1.44	1.43	1.23	3.58	4.81	0.66	4.89	2.05	1.42	5.76
AL832212	0	0.63	0	0	2.85	3.8	1.52	0	1.26	23.76	11.53	23.25	46.78	8.51	30.54	24.03	11.58	12.94	9.54	47.89	11.34	20.45	26.81	10.25
AL832252	3.15	4.67	9.77	4.89	10.2	3.49	0.32	0.18	0.46	0.5	1.21	5.27	0.9	2.91	1.28	0.86	1.39	1.57	1.23	0.56	3.86	1.71	0.41	1.17
AL832378	0	0	0.03	0	0	0	0	0	0	0	0	0.1	0.07	0.3	0	0.12	0.16	0.17	0	0	0	0	0.06	0
AL832384	4.43	16.55	20.34	6.26	3.81	15.77	18.64	0	27.87	6.26	27.89	2.58	65.9	17.59	0	0	0	14.99	10.75	16.68	12.1	13.56	7.92	15.68
AL832439	27.91	37.66	56.1	62.31	32.65	66.93	42.36	24.9	24.57	52.67	29.84	52.13	46.18	48.84	30.47	35.97	31.08	32.5	39.06	28.82	122.69	24.74	24.97	34.42
AL832447	5.26	5.63	6.45	5.62	10.28	2.93	0.26	0.28	0.77	0.58	0.61	6.41	3.84	3.49	1.99	7.11	1.82	1.49	2.14	1.3	2.69	1.08	0.51	1.92
AL832593	1.84	0.11	0.84	0.12	0.04	0	0.52	0.17	0.5	0.11	0.19	2.71	0.48	3.87	0	0.56	0.76	1.09	1.46	0.26	0	0	0.08	0.66
AL832615	0	4.68	1.55	2	0.42	2.97	1.09	0.87	5.55	3.32	10.16	1.31	10.97	10.09	2.53	9.26	2.76	0	5.6	4.84	4.63	2.43	4.98	1.86
AL832737	0	0	0	0	0	1.26	0	0	0	0.06	0	0	0	0	0	0	0	0	0.15	0.19	0	0	0.09	0
AL832797	3.6	5.84	8.32	6.24	4.92	4.1	0.35	0.25	3.39	1.89	0	0.24	2.14	0	0	0.3	0.13	0	0.24	0	0.33	0.59	0.14	0
AL832891	0.08	1.25	12.13	0	8.05	1.62	29.62	0.84	59.91	2.19	5.8	0	6.39	0	0	0	0	0	0	6.78	2.65	0	0	0
AL832909	5.06	9.67	8.22	5.89	9.84	16.82	43.89	44.18	25.29	42.15	49.47	17.8	27.69	13.6	34.74	28.29	30.58	6.97	5.86	13.07	13.55	21.87	24.95	23.87
AL832937	15.18	22.54	30.33	39.19	57.48	58.14	30.55	37.39	14.84	30.12	34.15	66.82	44.32	82.31	37.93	20.99	25.68	31.58	38.56	23.88	70.03	41.41	23.25	39.48
AL833139	5.34	6.85	12.8	8.96	9.76	5.26	0	0	0	0	0.47	0	0.25	0	0.18	0.63	0	0	2.41	0.22	0	0	0	0
AL833150	12.04	19.34	24.57	17.36	18.51	14.63	0.28	0.99	0.67	3.61	1.59	12.97	4.77	12.05	1.79	1.4	1.62	9.79	11.47	2.93	11.08	6.23	2.22	2.55
AL833181	0	1.26	2.47	4.39	1.17	3.2	5.91	0.93	4.95	3.1	7.17	0.63	0.35	1.91	0.25	0.58	2.08	0.27	1.59	0.2	0.87	0	0.09	0
AL833455	6.87	8.3	9	4.19	1.88	8.76	9.49	11.55	12.87	10.33	7.81	8.08	13.36	9.25	10.26	10.41	11.18	6.27	7.8	18.11	18.5	18.35	15.23	20.6
AL833634	1.21	3.05	6.82	2.2	2.72	1.6	0	0	0.83	0	2.62	0.32	0.7	0.95	1.98	0.39	2	0.35	0	0	0	0.52	0.37	1.58
AL953854.2-002	0.05	0	0	0	0	0	2.12	0	0	1.19	0.89	0	0.92	0	0.63	0.27	0.12	0	0.76	0.97	0	0	0.17	0
ALAD	8.78	16.67	5.69	8.57	10.69	18.07	15.22	10.23	14.05	13.72	9.44	10.69	10.59	22.58	11.98	7.48	13.58	10.15	13.42	6.27	30.61	12.83	10.52	19.71
ALAS1	51.76	54.11	50.7	173.19	108.68	34.05	31.86	33.3	46.22	29.4	61.59	54.74	47.32	49.01	73.72	46.42	53.33	19.86	21.96	26.5	20.66	42.71	32.74	53
ALAS2	0	2.03	13.48	5.9	0	0	59.39	1.44	1.9	4.57	8.5	0.31	0	0	0.32	0	0	0	0	0	0	0.25	0	0
ALB	0	0	0	1.53	0	0	1076.26	4.48	0	2.94	1.48	3.09	3.95	1.08	1.86	4.82	0	6.27	3.09	3.77	12	2.33	6.88	2.08
ALCAM	49.82	69.2	66.45	32.59	30.97	95.39	139.73	149.62	162.12	194.29	133.55	87.43	131.12	62.94	79.4	54.32	71.87	84.37	76.52	204.91	223.1	149.7	148.33	231.28
ALDH16A1	0	14.74	1.4	1.85	2.18	1.59	4.26	4.91	5.37	3.79	5.78	8.41	7.53	4.65	5.13	2.32	4.12	6.9	2.41	7.61	2.55	7.53	6.67	6.83
ALDH18A1	9.35	11.4	11.71	6.99	10.84	23.8	16.5	20.25	17.37	26.42	38.17	39.22	20.55	57.01	27.24	26.14	42.09	29.16	16.56	22.7	46.98	34.07	38.98	40.13
ALDH1A1	213.88	126.3	166.74	98.59	64.18	167.44	2202.2	2744.52	3436.75	2795.46	2974.57	1262.66	815.2	666.26	2108.58	1357.75	1097.4	142.22	88.39	140.12	221.4	321.81	646.85	367.01
ALDH1A2	0	0	2.98	0	0	0.05	0	0.71	0.8	0.23	0.51	0.89	0	0	0	0	0	0	0	0	0	0	0.21	0
ALDH1A3	0.13	0.21	3.11	0	0.12	0	0	0.76	7.49	0	0.51	2.65	1.19	0.84	1.45	0.45	0.49	1.48	0.34	3.26	0.51	1.97	2.2	2.32
ALDH1B1	12.27	6.31	16.5	8.37	22.79	13.32	22.14	36.92	25.13	43.92	37.4	6.74	15.37	20.88	26.63	5.19	16.32	2.57	1.54	3.56	5.56	8.3	6.46	7.67
ALDH1L1	1.71	2.97	4.81	2.65	14.47	1.39	0.61	0	0	0.05	0.77	0.28	0.2	0.8	0	0	0	0.31	0.19	0	0.77	0	0.11	0
ALDH1L2	1.79	1.53	2.99	2.29	0.62	0.91	1.88	0.6	1.83	0.99	4.69	10.56	4.6	14.71	13.07	7.63	10.14	5.51	4.94	2.64	9.11	9.53	8.31	9.64
ALDH2	3.91	15.08	12.36	26.37	13.84	3.38	48.94	50.86	36.9	28.14	37.7	24.24	54.02	17.38	90.58	44.83	58.22	12.08	8.38	30.76	17.11	44.53	27.53	45.19
ALDH3A1	1.09	1.89	1.93	0.78	1.36	0.48	0	0	0	0	0	0.59	0.55	0	0	1.22	0.18	0	0	0	0	0	0	0
ALDH3A2	14.63	18.58	22.43	16.34	16.72	32.63	42.11	26.06	49.78	32.09	36.19	7.12	21.73	14.82	21.14	13.75	26.57	6.11	8.92	20.21	27.1	29.34	31.09	43.92
ALDH3B1	14.67	14.56	20.53	22.16	36.35	12.58	0.08	2.03	0	0.77	1.51	2.12	2.57	3.63	1.94	0.67	1.27	0.37	0.88	0.28	0	0	0.13	0.39
ALDH3B2	0	1.96	0	0	0	0	0	0	0	0	0	0	0	0	0	0	0	0	0	0	0	0	0	0
ALDH4A1	1.49	6.33	3.48	9.44	57.68	6.4	2.59	16.1	6.52	4.1	2.77	2	1.47	1.37	0.65	0.31	1.19	2.24	1	1.75	3	1.83	1.88	3.12
ALDH5A1	3.26	11.38	25.51	8.73	6.84	4.17	11.37	19.16	31.13	26.83	14.78	13.08	8.96	15.03	13.5	8.04	10.36	8.9	10.34	9.77	18.56	5.67	5.52	6.17
ALDH6A1	15.63	3.3	4.85	1.05	0.36	5.38	17.8	6.49	7.61	6.05	10.95	13.59	7.15	6.43	7.16	3.99	3.31	5.29	4.09	9.3	12.77	7.1	8.85	8.15
ALDH7A1	4.07	8.57	13.51	8.44	7.58	10.47	12.35	13.31	36.6	13.95	15.79	8.29	13.66	8.44	11.86	10.39	10.4	5.12	4.63	8.8	10.28	8.51	9.5	7.9
ALDH8A1	1.81	1.06	1.87	1.24	1.59	1.08	1.62	0.06	0.65	1.52	0	2.23	3.81	2.61	0.77	3.18	1.44	1.55	1.24	1.26	1.36	0.4	0.86	1.73
ALDH9A1	9.73	22.89	27.94	23.92	18.17	35.27	36.62	29.99	23.9	51.3	46.26	40.48	31.15	33.46	37.95	27.02	26.36	21.66	13.54	35.3	57.8	32.97	39.47	38.38
ALDOA	123.86	114.45	120.57	94.91	106.97	91.6	191.95	157.98	186.8	138.19	152.57	342.75	242.07	466.53	352.96	202.51	246.63	328.66	152.95	176.33	251.7	656.51	593.16	635.23
ALDOB	0	0.83	0.21	4.45	0	1.3	16.26	6.41	0	1	4.38	0.49	5.38	0.37	1.91	2.24	1.29	1.09	3.67	5.46	2.36	7.36	4.67	2.84
ALDOC	12.9	8.02	7.18	2.67	5.24	22.32	6.86	6.44	5.71	14.72	13.01	15.55	8.52	10.34	21.53	15.97	20.49	19.37	6.16	16.45	31.98	49.33	45.79	67.84
ALG1	6.91	6.38	11.15	8.11	9.93	11.75	0.89	4.24	0.24	5.18	4.41	8.18	1.3	10.05	3.21	3.24	3.92	6.2	4.52	3.69	10.21	2.53	2.72	5.48
ALG10	2.51	1.65	4.3	1.71	3.94	0.8	1.07	1.27	1.48	4.1	9.61	3.97	0.97	2.85	0.81	0.58	1.48	0.53	4.17	2.05	8.45	3.69	4.63	6.07
ALG10B	1.73	2.13	2.89	2.69	2.24	3	3.29	3.12	3.02	4.43	5.57	2.62	0.72	2.46	2.83	2.52	2.44	1.43	4.43	2.55	8.25	6.98	6.5	7.38
ALG11	4.25	4.84	6.28	4.04	13.8	3.11	0	2.44	5.44	4.13	2.86	4.74	3.27	5.8	4.63	2.18	2.82	2.48	5.94	4.93	9.4	6.28	5.5	4.93
ALG12	7.25	6.82	6.38	8.91	9.57	5.52	7.36	7.52	22.89	6.86	6.54	10	4.4	17.31	6.25	3.67	3.69	9.49	6.26	2.71	9.29	4.27	1.88	6.44
ALG13	43.1	22.7	18.03	9	14.41	17.2	52.4	30.11	46.73	53.92	33.72	22.79	24.86	29.28	26.19	21.36	20.89	15.42	31.3	25.48	32.24	35.57	25.03	36.88
ALG14	0.41	1.3	2.92	1.06	0	0.61	9.26	15.33	2.02	10.66	19.95	6.87	7.62	2.58	8.71	5.99	8.54	1.91	1.72	9.95	3.18	11.27	5.67	8.15
ALG1L	0.5	4.25	6.05	3.89	3.01	0.64	0	0	0	0	1.06	0	0	0	1.32	0.6	2.67	0.84	0	0	0	0.2	0	1.47
ALG1L2	1.98	1.44	0.38	1.41	0	1.91	0	0	0	0	0	0	0	0	0	0	0	0	0.64	0	0	0	0.38	0
ALG1L9P	5.55	0.45	0	0.39	0.48	0.42	0	0.27	0	0	0	2.26	0	0.57	0	0	0.2	0.21	0.38	0.24	0.52	0.31	1.53	1.26
ALG2	27.07	24.27	46.13	36.27	27.93	70.48	16.77	36.3	32.04	41.97	58.68	33.3	36.93	30.62	40.36	28.5	27.87	24.87	29.81	35.47	51.27	60.2	50.4	66.88
ALG3	13.38	26.85	17.08	19.11	2.96	3.4	8.96	9.98	5.62	17.01	26.49	37.29	21.92	39.43	22.85	22.65	25.42	16.86	14.16	14.18	30.87	23.74	25.58	33.59
ALG5	4.47	6.11	11.43	6.81	5.11	8.29	21.84	59.17	67.28	60.48	47.37	11.91	16.49	20.89	11.96	14.65	12.59	8.3	5.47	23.93	24.09	29.69	27.11	25.32
ALG6	3.42	0.7	4.32	1.76	2.31	9.04	11.43	7.01	5.48	8.03	6.98	2.28	3.24	5.54	3.46	1.82	2.46	0.68	4.39	1.79	6.5	4.19	3.24	7.27
ALG8	11.52	13.06	34.84	13.53	23.78	10.28	29.87	22.59	45.17	31.07	19.67	10.26	14.67	15.08	28.07	23.32	30.81	9.19	2.87	9.17	19.29	20.92	24.32	29.53
ALG9	19.03	6.79	22.17	4.46	18.67	11.92	18.28	7.16	11.87	11.64	18.38	11.24	6.57	15.36	10.06	4.95	5.54	8.44	12.44	8.56	20.23	11.81	12.94	15.17
ALK	0	3.33	0.21	0	0.06	0	0.03	0.41	1.14	0.69	0.77	1.87	5.27	7.07	3.7	2	0.94	0.79	2.44	2.09	2.31	2.66	0.81	1.16
ALKBH1	13.79	20.72	4.09	4.9	1.7	18.71	2.33	8.07	5.99	13.32	12.62	10.77	8.06	8.28	10.49	4.62	4.11	6.39	7.35	13.6	7.57	9.7	8.09	12
ALKBH2	5.13	0.2	6.02	1.14	1.62	0.57	18.5	1.85	5.48	12.03	0.9	4.01	1.6	8.66	8.98	5.02	7.91	3.37	2.89	4.02	4.48	16.68	18.25	18.35
ALKBH3	1.27	4.01	8.3	7.84	11.41	7.4	16.84	12.02	6.68	13.28	19.87	17.81	11.16	26.16	23.28	11.63	15.14	9.85	16.53	17.49	19.84	34.72	36.54	46.34
ALKBH4	3.7	20.27	9.19	5.87	9.38	6.97	5.97	4.98	3.33	4.69	6.18	8.49	2.47	10.14	3.97	2.33	4.8	4.09	4.11	4.48	7.34	2.15	1.53	8.78
ALKBH5	17.54	32.61	26.53	16.52	24.22	30.93	97.63	55.47	44.56	67.71	79.85	90.92	170.48	135.15	100.51	60.46	78.55	47.56	73.73	90.49	97.83	147.29	107.01	131.82
ALKBH6	11.47	6.62	33.34	12.61	2.57	3.9	5.74	9.37	2.87	16.16	4.42	24.68	11.64	17.92	12.44	9.66	13.99	11.44	8.83	7.71	15.75	15.07	16.03	19.01
ALKBH7	13.73	5.13	16.5	5.6	7.55	4.8	20.31	37.28	43.65	22.14	42.59	9.92	14.31	6.1	20.3	14.69	16.05	6.79	3.62	16.22	0.62	23.26	26.51	28.64
ALKBH8	3.01	3.92	7.81	0.94	1.45	3.61	5.19	3.96	1.1	5.8	4.27	1.88	1.44	3.55	3.87	0.59	2.42	1.56	1.48	1.75	5.1	3.65	2.92	5.12
ALLC	0	0	0	0	0	0.77	0	0	4.46	0	0	0.64	0	0.62	0	1.27	0	0.69	0	0.53	0	0	0	0.69
ALMS1	18.58	39.98	44.7	20.57	18.06	22.28	24.43	28.53	57.8	43.01	61.02	24.73	24.65	26.5	21.2	12.42	11.38	17.38	21.57	23.09	40.44	25.25	21.31	23.28
ALMS1P	0	2.03	0	0.79	0	0	0.41	0.58	24.03	2.01	1.56	0.75	2.49	3.95	0.59	2.99	0.8	1.26	1.5	5.53	4.15	5.21	2.18	1.57
ALOX12	10.91	19.54	4.99	6.16	25.49	0.67	0	0.77	0.52	0.82	0.83	1.18	3.43	5.16	3.04	2.92	0.76	0.7	1.56	0.38	1.63	4.86	3.24	2.48
ALOX12B	0	0	0	0	0	0.44	0	0	0	0	0	1.96	0	0.36	0.37	0.72	0.25	0.66	1.66	0.3	3.26	0.58	0.27	0.79
ALOX12P2	0.81	5.6	12.43	11.24	0.18	6.58	7.31	0.29	1.59	3.95	3.33	8.93	13.42	20.37	7.53	8.69	5.68	10.57	29.24	16.66	34.81	23.41	19.28	33.16
ALOX15	0.18	3.65	8.1	1.16	1.25	0.8	0.16	0	0	0	0	1.25	0	1.32	0	0.13	0.11	0.49	0.44	0.14	0.3	0	0	0
ALOX15B	0	0	0	0	0	0	0	0	0	0	0	2.56	0.7	1.43	0	0.29	0.75	0.66	0.2	0.3	0	0	0.14	0.4
ALOX5AP	198.93	124.87	23.8	343.1	659.55	1.25	0	6.14	0.6	0.28	1.88	0	1.49	0	0.35	0.83	0	1.12	0	0.87	0.94	1.11	1.18	0
ALOXE3	0	0	0.21	1.23	0	0.16	0	0.08	0	0.22	0	2.19	7.36	2.2	0.97	0.78	1.15	0.88	0.7	1	2.01	0.45	0.53	1.52
ALPI	0	6.67	0	0	0	0	0	0	0	0	0	0	0	0	0	0	0	0	0.23	0	0	0	0	0
ALPK1	9.86	10.16	2.46	7	7.45	2.75	1.44	0.63	4.61	0.44	0	0.68	3.15	1.39	0.62	1.49	0.42	0	1.3	0.79	1.92	1.36	1.73	1.12
ALPK2	0	0	0.91	0.08	0	0.02	0	0	0.53	0	0	0	0	0.69	0.21	0	0.08	0.24	0.36	0.1	0.21	0	0	0
ALPK3	43.67	53.15	58.26	36.19	68.13	81.02	35.49	26.8	20	40.02	44.22	157.62	80.42	107.58	100.34	147.42	76.42	76.98	64.72	77.88	97.69	87.44	85.48	82.18
ALPL	0.85	74.78	1.24	0.68	1.73	0.19	0	0	11.85	0.74	0	0	0.19	0.35	0	0	0.14	0	0.46	0.16	0	1.46	0.89	1.28
ALPP	0.25	0.27	0.76	0.24	0	0.22	0	0	0	0	0	0.21	0.45	0	0	0.38	0.11	0.23	0.62	0	0.41	0	0	0
ALPPL2	0	0	0.07	0.25	0	0	0	0	0	0	0	0.48	0.35	0	0	0	0	0	0	0	0.51	0	0	0
ALS2	5.46	18.35	12.92	14.29	22.09	12.4	19.82	20.08	19.39	29.41	40.11	16.39	50.98	18.6	21.48	15.44	23.51	10.08	17.38	30.41	36.55	26.26	26.33	39.54
ALS2CL	0.11	0.1	0.45	0.09	0	0	0.19	0.05	0	0.22	0.49	0.89	0.65	1.98	1.01	1.89	0	1.52	0.36	3.28	2.31	4.19	1.54	3.98
ALS2CR11	0.96	0.48	0.38	0.82	1.84	0.22	2.46	2.86	3.83	3.08	0.94	1.05	0.41	1.27	0.53	0.58	1.33	0.83	2.7	1.31	3.25	2.28	1.11	2.26
ALS2CR12	0.15	0.87	0.87	0.24	0.99	0	0.11	0	1.34	0.25	0	3.67	0.9	5.86	1.12	0.37	0.94	2.28	3.63	0.39	9.71	0.25	0	0.76
ALS2CR8	15.42	12.62	14.04	8.17	5.39	22.39	6.51	17.37	14.42	21.23	20.4	10.05	6.73	7.43	10.09	10.59	10.08	9.01	15.99	9.76	30.57	8.79	11.96	19.61
ALX1	0	0	0	0	0	0	0	0	0	0	0	0	0	0	0	0	0	0	0.47	0	0	0	0	0
ALX3	2.95	0.58	0	0.53	0.26	0.22	0.15	0	0	0	0	1.62	0.6	1.83	0.64	0	0	0.23	1.22	0	0.56	0	0	0.34
ALX4	0.2	0	0	0.2	1.04	0	0.16	0	0	0.48	0.15	0.54	1.34	1.78	0.06	0.13	0.28	0.06	0.54	0.82	0.3	0	0	0.62
ALYREF	11.39	12.99	9.84	14.24	6.2	34.56	62.3	30.2	35.51	35.77	19.95	34.14	56.59	36.4	49.08	37.29	32.55	8.29	4.96	20.21	14.53	25.3	21.83	20.28
AMACR	58.12	73.24	51.51	25.98	22.06	56.5	56.23	42.32	23.22	76.08	44.94	22.23	44.13	17.65	30.05	20.99	26.41	13.49	28.78	48.13	31.4	35.6	44.44	38.83
AMBN	0	0	0	0	0	0	0	0	0	0	0	0.3	0.22	0.45	0	2	0.16	0	0	0	0	0	0	0
AMBP	0.45	2.77	6.55	0	2.15	2.99	82.89	15.24	21.09	14.45	19.78	3.35	24.01	5.18	10.29	22.93	7.22	0.47	0.94	4.85	0	3.76	4.38	1.18
AMD1	28.47	17.11	43.37	28.09	33.71	40.34	81.36	43.77	33.9	57.33	63.22	51.15	49.05	43.05	18.27	15.71	27.15	15.22	26.7	30.21	38.23	26.63	19.56	26.92
AMDHD1	0	0	0	2.2	0	0	2.09	0.07	0	0.71	1.19	0.57	0	0	0.3	0	0.61	0.16	0.29	0.37	0	1.17	0.64	0.72
AMDHD2	6.66	4.44	6.81	2.54	3.09	0.11	1.61	0.41	3.87	2.47	1.19	10.18	2.78	4.1	10.6	4.51	5.25	9.86	1.63	2.17	1.11	6.08	10.76	16.7
AMELX	0	0	0	0	0	0	0	0	0	0	0	0	0	1.24	0	0.51	0	0	0	0	0	0	0	0
AMELY	0	0	0	0	0	0	0	0	0	0	0	0	0.57	0	1.21	0.47	0.41	0	0	0	0	0	0.89	0
AMER1	2.4	4.68	9.29	2.82	19.96	6.64	4.45	6.63	9.44	4.04	7.89	2.78	3.3	8.09	2.88	1.7	2.15	3	5.22	1.19	10.24	5.9	3.11	1.5
AMER2	0	0.06	0.12	0.06	0	0	0.38	0.05	0	0.09	0.29	0	0	0.63	0	0	0	0.58	0.21	2.14	0.58	0	0.48	0.69
AMER3	12.16	15.77	10.54	13.61	23.95	9.46	16.15	12.57	12.38	16.49	16.7	21.33	10.15	23.4	8.15	9.69	12.95	8.59	11.17	6.12	17.24	10.27	9.73	18.38
AMFR	3.17	7.51	10.7	8.5	8.5	9.3	17.01	25.13	31.16	24.01	19.76	30.94	38.75	47.73	26.59	20.92	23.49	27.94	23.44	24.74	52.32	22.74	28.42	27.4
AMH	2.03	1.68	1	0.47	2.18	1.1	5.69	0.84	2.32	0.36	2.44	2.95	3.9	9.76	0	0.72	1.09	1.81	2.36	1.32	0.81	0.48	0.17	1.47
AMHR2	0	0	0.64	0	0	0	0.14	0.69	0.66	0	0.52	0.76	0	1.05	0	0.23	0	0	0.38	0.24	0.52	0	0	0
AMICA1	20.74	53.78	2.06	12.81	11.09	0.78	0	0	0	0.67	0	0.57	0.63	0.37	0	0.45	0	1.67	0.9	0	0.44	0	0	0
AMIGO1	3.84	0.92	5.39	2.13	5.17	2.62	1.66	1.05	11.92	3.44	6.69	6.05	6.84	21.26	6.49	3.08	10.08	11.5	16.59	5.36	27.38	9.59	10	15.2
AMIGO2	1.53	4.98	3.46	1.71	0	2.4	6.81	1.85	3.68	5.02	3.2	0.38	0	0.58	0	0.24	0.56	0	0	0	1.58	1.25	0.44	0.32
AMIGO3	5.49	16.29	16.2	4.78	0.58	6.3	5.2	8.28	24.94	11.31	8.21	18.1	13.26	14.98	5.38	5.59	3.46	10.77	8.17	13.07	8.21	14.08	6.33	5.95
AMMECR1	4.98	2.44	3.77	2.87	3.81	2.74	3.97	2.47	18.94	7.97	7.74	5.53	6.98	7.53	2.01	1.89	2.62	1.24	4.78	3.31	6.08	1.44	2.57	3.24
AMMECR1L	20.54	14.85	8.03	12.32	10.4	12.21	8.49	13.09	10.12	10.53	19.12	4.94	14.92	6.64	7.72	9.35	7.59	3.54	5.08	10	8.87	7.1	9.9	15.02
AMN	7.67	12.67	15.9	4.07	17.06	7.15	0.14	1.19	0	0	0.53	4.61	0.57	3.54	0.2	0.16	0.81	0.44	0.26	0	0	0	0	0
AMN1	8.04	7.23	10.38	12.09	13.66	12.56	14.8	20.03	22.45	28.02	13.21	7.22	10.61	8.15	17.56	15.11	20.52	6.22	6.33	10.98	15.05	24.79	16.01	20.31
AMOT	4.13	11.22	16.79	9.77	6.21	12.23	6.48	5.95	14.86	7.31	16.48	15.49	10.97	23.32	18.45	4.92	9.17	4.06	6.06	4.92	12.17	9.39	4.29	5.57
AMOTL1	2.59	6.82	7.18	5.22	7.32	13.8	11.66	18.71	42.41	18.24	28.89	3.28	14.97	2.9	17.14	11.25	2.08	0.7	0.6	2.98	1.96	1.11	1.34	0.38
AMOTL2	0	0.25	3.24	0.23	4.75	0.54	3.15	13.9	12.75	2.36	5.96	4.39	4.02	1.31	0.38	3.35	0.38	0.59	0.47	2.49	0.79	0.35	0.17	0
AMPD1	0.12	0.56	0.14	0	0	0	0.09	0.06	0	0	0	1.24	0.91	3.36	0	0.15	0	0	1.24	0	1.71	0.4	0	0
AMPD2	52	87.29	112.25	86.22	75.14	89.58	69.15	74.32	110.67	88.17	67.85	78.79	77.06	82.29	63.22	45.48	57.72	75.07	54.63	108.19	58.07	66.61	78.69	102.77
AMPD3	19.43	25.84	5.74	44.88	76.48	7.12	8.39	13.16	5.14	11.51	12.7	40.27	67.49	22.93	15.37	50.92	9.82	33.38	34.06	43.68	34.47	26.29	42.95	15.85
AMPH	2.3	1.05	3.76	1.64	6.05	1.86	17.35	16.3	15.96	23.68	20.56	3.12	14.34	9.69	5.47	7.54	10.43	10.73	17.19	27.73	42.21	7.27	4.31	17.58
AMT	61.39	24.65	39.4	18.49	20.61	21.41	10.26	17.55	4.93	42.5	17.64	14.25	23.34	9.02	37.39	12.89	27.83	16.35	7.67	23.31	10.36	22.97	16.76	33.84
AMTN	0	0	0	0	0	0	0	0	0	0	0	0	0	0	0	2.26	0.33	0	0	0	0	0	0	0
AMY1A	0	0	0	0	0	0	0.14	0	0	0.32	0	0	0	0	0.22	0	0.19	0	0	0.36	0	0	0	0
AMY2A	0	0	0	0	0	0	0.13	0	0	0	0.96	1.51	42.19	19.57	0	0.22	0	2.57	10.2	225.64	37.86	0	1.92	0.54
AMY2B	1.85	1.92	6.43	4.44	7.45	4.72	6.54	8.73	21.86	25.53	12.37	11.27	19.99	18.43	12.68	11.95	13.51	10.84	8.8	21.05	47.43	12.17	11.86	29.15
AMZ1	1.08	2.39	4.87	5.3	4.16	5.11	5.4	1.93	6.02	5.72	11.34	12.29	23.56	13.4	4.98	6.66	5.51	6.83	6.5	11.08	10.94	9.82	4.52	4.77
AMZ2	84.68	71.35	57.58	92.99	76.39	64.55	93.76	47.78	15.11	60.53	47.65	84.38	47.99	114.09	75.15	45.78	62.32	31.91	102.13	33.55	120.6	97.88	85.04	109.69
AMZ2P1	3.88	2.09	5.89	2.6	2.6	4.66	6.87	7.22	5.04	10.7	5.42	7.72	12.47	7.75	6.29	8.25	1.93	5.99	9.62	5.35	9.22	14.81	17.01	11.37
ANAPC1	7.88	23.39	10.16	14.56	12.83	16.57	12.7	18.75	14.59	17.47	19.87	13.1	20.15	17.72	18.93	13.43	27.89	7.88	10.89	22.91	25.7	24.57	23.03	41.66
ANAPC11	119.5	70.12	252.08	82.85	91.25	61.12	76.58	193.83	84.87	147.32	166.26	26.21	156.12	19.68	231.64	160.76	183.05	10.92	11.48	67.04	9.58	120.65	161.77	169.85
ANAPC13	13.16	10.4	35.91	28.48	29.49	40.17	14.99	12.57	49.65	32.13	61.7	73.32	24.13	83.91	51.82	43.28	53.37	26.08	22.97	28.52	67.18	37.18	60.52	40.9
ANAPC15	46.51	23.96	46.91	35.44	58.65	51.17	37.07	41.47	17.08	40.96	23.15	20.95	53.75	6.55	58.62	37.94	47.5	17.14	4.48	22.03	20.42	27.02	25.42	31.27
ANAPC16	31.06	40.06	47.81	38.1	35.34	41.15	36.17	44.2	27.93	46.81	45.51	14.09	40.88	16.81	44.72	26.72	41.67	11.6	10.83	31.99	25.52	77.49	68.36	87.79
ANAPC1P1	0.97	4.51	1.94	0.14	5.27	0.7	0	0.56	0	0.15	0	0.35	0	0	0.2	0	0	0.2	0	0.22	0.48	0	0	0.29
ANAPC2	2.79	11.79	3.21	0.29	32.63	2.94	1.01	0.67	4.13	4.16	3.21	22.89	3.44	31.22	5.3	0.74	2.46	22.65	22.67	2.53	16.14	3.35	2.68	4.14
ANAPC4	5.96	18	10.28	13.65	4.35	18.86	20.28	11.39	19.64	25.33	36.15	7.18	14.79	7.42	13.71	5.64	12.53	5.03	12.33	11.31	27.91	14.96	14.18	21.13
ANAPC5	52.88	73.02	65.17	45.58	26.56	32.32	40.98	57.78	73.91	79.69	77.08	36.26	80.44	60.26	55.99	30.06	67.48	38.62	70.33	105.6	98.37	61.32	62.03	94.36
ANAPC7	19.92	17.34	23.55	10.84	11	14.02	29.98	21.39	29.57	28.44	32.26	17.93	15.03	29.13	35.31	12.43	26.36	9.71	13.37	19.47	30.81	38.12	19.42	40.01
ANG	0	0	0	0	0	2.2	4.91	3.9	4.44	7.26	0	39.86	8.87	5.79	77.74	37.41	58.68	1.84	0	2.18	2.04	7.52	2.44	1.22
ANGEL1	66.09	54.95	37.81	44.49	59.33	64.02	84.11	67.36	43.57	61.31	57.45	41.27	34.7	38.23	43.69	30.17	37.91	36.33	48.82	59.04	52.35	43.65	45.57	70.36
ANGEL2	9.57	11.36	20.49	12.5	9.57	9.73	9.02	8.81	8.79	11.32	45.21	22.48	29.35	19.67	11.78	21.2	15.7	13.15	25.74	26.07	34.08	38.39	43.8	38.83
ANGPT1	0.46	0.29	3.73	0.97	1.4	0.02	0.34	1.49	0.14	0.14	1.83	0	0	0.25	0	0	0	0	0	0	0.64	0	0	0
ANGPT2	8.36	1.76	9.22	4.78	3.91	1.79	8.93	5.05	13.53	5.93	18.52	6.73	8.6	3.92	6.21	10.43	6.42	2.73	3.23	5.57	5.01	4.67	4.41	3.88
ANGPT4	0	1.7	0	0	0	0	0	0	0	0	0	0	0	0	0	0	0	0	0	0	0	0	0	0
ANGPTL1	8.12	1.37	6.85	0.82	0.69	2.7	8.01	4.15	6.57	5.61	8.97	3.78	6.04	5.18	1.45	2.18	4.97	2.69	2.41	3.17	4.01	1.75	0.99	0.91
ANGPTL2	2.32	7.78	15.84	3.06	2.75	11.29	6.12	4.28	7.62	4.21	6.02	5.92	4.97	8.9	12.4	2.54	8.76	14.94	11.75	3.91	24.99	24.75	30.9	24.17
ANGPTL4	0	0	0.95	0	8.41	0	3.89	0.34	3.5	0	0.92	5.33	1.47	5.52	2.61	0.2	1.06	2.79	2	1.07	1.37	0.27	0.58	0.28
ANGPTL5	0	3.49	0.21	0.13	2.98	0	0	1.22	0	0.62	0.35	1.25	0.73	0.38	1.96	0	0.26	0	1.51	2.24	0.69	1.22	1.74	2.71
ANGPTL6	0	0	4.54	3.11	0	0.14	0	0.46	18	0.18	1.5	0	2.62	0.7	0	0.3	0	0	0	0	0	0	0	2.7
ANHX	0.08	0	0	0	0	0	0	0	0	0	0	0	0.25	0.51	0	0	0	0	0	0.43	0	0	0	0
ANK1	0.34	3.95	0.54	0.55	0	3.05	2.58	0	0	0	0.62	0.91	0.96	2.17	0.37	0.56	0.87	1.03	3.68	2.55	1.79	1.4	0.66	1.58
ANK2	4.09	6.74	12.89	2.77	2.78	10.51	28.01	22.04	37.72	21.84	27.8	17.99	40.93	27.4	26.24	13.37	23.28	6.64	2.68	7.17	11.64	7.79	3.63	7.35
ANK3	30.8	18.12	43.01	14.71	14.08	13.79	30.17	30.63	56.45	38.4	45.92	4.37	7.26	6.06	1.44	2.08	3.88	7	13.1	11.73	19.09	8.49	6.03	5.26
ANKAR	6.87	3.21	1.32	1.13	0.72	0.89	3.01	3.86	1.42	2.14	2.4	7.29	5.63	5.99	2.49	2.5	4.18	2.8	6.45	5.93	12.67	8.7	3.63	6.46
ANKDD1A	4.94	18.83	20.5	15.06	5.31	10.62	0.4	3.07	5.63	4.01	1.8	2.4	5.01	4.28	6.83	3.61	2.89	1.48	2.63	3.06	3.41	3.73	3.2	5.24
ANKEF1	1.31	2.47	2.63	3.11	2.67	4.8	4.41	9.64	2.32	9.16	16.54	5.8	11.09	10.8	13.04	6.4	8.34	4.47	5.5	6.49	13.92	9.02	9.52	14.7
ANKFN1	0	0	0	0	0	0	0	0	0	0	0	1.47	0	0	0.13	0.3	0.39	0	0.24	0	0	0	0	1.63
ANKFY1	6.98	17.03	19.42	20.55	13.3	28.11	18.53	24.16	38.97	30.96	50.35	25.81	37.31	53.09	29.24	19.46	28.91	17.16	28.99	33.02	54.66	26.59	25.65	44.18
ANKH	25.37	20.09	22.71	20.77	11.53	37.57	47.96	42.85	43.7	59.17	47.36	73.6	71.44	67.9	67.26	49.81	56.36	34.68	45.9	70.31	76.99	61.65	57.14	81.47
ANKHD1	41.82	83.17	48.83	53.29	74.48	51.45	87.74	53.39	72.97	115.47	99.89	121.07	161.23	116.33	123.44	79.45	86.99	52.05	97.39	71.38	246.39	104.22	117.61	166.21
ANKHD1-EIF4EBP3	39.75	23.76	44.75	52.77	62.25	45.74	17.4	38.98	33.68	20.27	38.06	76.17	55.22	60.36	27.75	30.22	48.77	46.68	70.96	26.34	64.13	37.36	32.51	42.4
ANKIB1	13.01	11.29	16.76	12.32	13.59	21.4	25.77	18.99	19.51	43.23	34.94	15.77	23.34	22.43	22.39	12.68	17.85	8.31	13.72	18.63	34.05	24.12	19.74	37.75
ANKK1	0.2	0.21	0.48	0.21	0.33	0.15	0.93	0	0	0.38	0.32	1.16	1.37	1.75	0.36	0.57	1.6	0.39	1.87	0.45	0.64	1.14	0.54	0.39
ANKLE1	5.62	4.09	7.17	5.8	7.36	4.35	0.07	0.9	0.54	0.63	1.98	3.68	3.77	0.62	0.54	0.71	1.83	1.26	1.65	3.46	1.42	0.67	0.71	0.8
ANKLE2	18.12	29.34	20.08	35.98	28.86	24.58	32.56	38.94	83.62	54.38	79	45.79	91.58	58.31	40.73	39.45	45.6	20.83	32.32	40.48	49.07	65.97	63.93	64.66
ANKMY1	2.14	22.89	8.06	9.16	6.72	5.28	3.91	1.69	1.37	4.84	2.9	10.97	14.48	13.35	10.98	9.43	15.4	4.24	13.12	3.48	8.53	4.25	7.35	13.34
ANKMY2	3.14	4.02	10.92	3.18	1.42	2.84	18.45	18	15.97	13.76	16.29	7.88	14.28	7.33	12.55	6.1	13.08	12.17	10.92	15.1	28.41	25.29	31.42	35.45
ANKRA2	11.56	17.13	9.04	11.62	9.91	5.17	15.14	17.25	46.71	17.39	15.28	10.81	15.27	9.76	19.84	11.57	11.84	5.88	13.26	17.26	18.99	16.29	19.1	22.92
ANKRD1	0	0	0.17	0	0	0	0	0	1.05	0.12	0	0.3	0	0	1.1	0	0	0	0	0	0	0.25	0	0
ANKRD10	19.54	35.79	54.11	43.69	12.27	26.54	56.24	33.68	108.06	78.96	73.79	26.03	47.19	28.39	60.23	66.73	39.68	27.94	41.4	36.8	54.11	46.14	84.65	36.88
ANKRD11	19.85	67.82	57.59	64.13	53.58	109.7	52.54	32.79	105.69	66.29	78.19	122.84	167.49	143.04	112.32	84.82	75.21	62.7	92.1	65.16	127.31	85.6	94.53	128.43
ANKRD12	30.52	27.91	45.87	34.56	41.44	43.71	38.36	67.55	29.79	68.8	86	162.24	151.86	121.56	105.5	99.8	74.69	78.54	82.94	80.1	268.32	91.07	88.51	120.59
ANKRD13A	32.41	32.73	33.67	40.65	43.02	29.44	60.95	57.54	53.79	81.24	72.25	34.12	54.1	24.06	37.68	41.59	27.93	15.05	29.77	36.89	56.23	51.95	49.57	68.23
ANKRD13B	6.59	9.41	9.6	9.53	7.39	10.31	2.91	7.47	6.08	7.83	4.65	9	2.58	13.68	5.27	1.98	3.91	5.78	5.9	2.16	9.75	4.21	3.65	5.05
ANKRD13C	7.33	6.42	4.85	6.83	9.88	10.3	31.96	10.12	18.56	26.02	23.17	33.05	41.7	22.75	21.53	13.85	15.16	12.02	21.51	14.92	22.72	12.36	13	15.95
ANKRD13D	32.9	16.35	13.56	32.02	38.37	7.23	19.76	19.17	30.66	22.93	25.1	22.27	13.93	34.28	11.33	12.22	13.25	18.16	23.64	10.36	20.5	14.44	10.42	24.36
ANKRD16	3.58	5.12	3.51	5.42	0.69	2	0.43	3.69	5.1	2.82	4.03	2.86	3.26	5.37	4.54	0.72	1.54	2.38	4.29	2.51	7.91	4.64	5.13	8.39
ANKRD17	52	59.7	69.18	56.8	56.1	98.92	73.17	69.8	66.88	98.81	108.02	102.05	83.74	104.92	66.17	64.82	68.15	47.04	58.85	52.28	141.07	49.72	62.93	85.03
ANKRD18A	21.56	2.22	4.73	24.59	7.09	9.15	5.47	12.64	3.71	15.29	18.26	23.18	28.12	24.69	21.34	13.98	18.56	9.93	17.34	45.95	34.78	51.38	22.83	25.54
ANKRD18B	0.23	0.18	0.44	0.15	0.03	0.05	0	0	0	0.07	0	0.92	0.12	1.66	0	0.29	0	0.4	0.37	0.1	0.45	0.14	0	0
ANKRD18DP	0.05	0	0	0	0	0	0	0	0	0	0	0.22	0.16	1.01	0	1.37	0.35	0	0.45	0	0	0	0	0.19
ANKRD19P	0.16	0.16	1.35	1.18	1.1	1.23	2.34	0.5	0	1.62	3.44	2.57	1.7	2.32	1.61	0.94	0.95	1.15	1.8	0.99	3.54	0.63	0.6	0.64
ANKRD2	0	0	0	0	0	0	0.16	0	0	0	0	0	0	0	0	0	0	0	0	0.28	0	0	0	0.37
ANKRD20A11P	1.01	1.34	1.38	1.02	1.8	0.69	0	0.42	0	0	0.77	0	0	0.81	0.36	0.85	2.09	0	0.46	0.3	1.6	0	1.34	2.09
ANKRD20A3	0.33	1.02	0.74	0.39	0	1.14	3.3	0.41	1.52	7.17	2.19	1.87	5.58	16.78	1.85	3.71	5.1	4.6	12.27	9.86	77.01	11.54	10.3	13.23
ANKRD20A4	1.19	1.15	4.79	2.89	0.36	0.86	5.59	0.28	2.1	10.04	6.87	2.18	6.1	0	0.74	2.03	6.38	3.31	3.27	15.18	2.83	16.27	7.86	29.84
ANKRD20A5P	1.02	3.03	5.57	1.2	0.28	1.54	0	0	0	0.57	4.35	0.32	0.12	0.44	0.15	0.44	0.39	0.15	1.15	0.28	2.75	0.23	0.33	1.41
ANKRD20A8P	1.26	0.9	1.68	1.56	0.11	0.2	0.21	0	0.74	1.51	0.43	0.95	2.04	2.66	0.69	0.49	2.34	0.35	2.37	2.89	4.03	2.73	1.66	3.72
ANKRD20A9P	2.16	2.48	3.46	3.48	3.14	1.82	0.73	0.98	1.43	2.01	2.1	4.17	3.07	15.23	1.17	2.35	1.47	1.63	2.98	1.91	5.26	1.5	2.07	1.76
ANKRD22	6.3	2.51	2.43	5.19	2.49	0.47	0	0.34	0	0	1.83	0.15	0	0.67	0	0.36	0.16	0.17	0	0	0.41	0.12	0	0
ANKRD23	0.17	2.18	2.26	0.51	0.18	1.38	0.97	0.68	0.24	2.87	3.33	8.93	3.03	8	2.75	1.08	4.2	55.98	15.98	17.27	22.11	14.94	25.5	13.15
ANKRD24	0.17	0.45	0	0.58	0	0.58	0.32	0.05	0.17	1.25	0	2.34	0.64	1.2	3.35	2.32	1.69	2.12	2.79	0.47	6.09	3.8	2.79	5.46
ANKRD26	3.75	4.24	4.19	2.74	1.25	5.37	7.1	4.7	10.25	10.99	6.76	6.14	7.76	11.02	9.16	7.87	8.92	4.16	8.64	6.47	36.94	12.68	9.51	15.42
ANKRD26P1	0.03	0.13	0	0.18	0.04	0.27	0	0	0	0	0	0.19	0.33	1.19	0	1.11	0.54	0.7	0.48	0.06	1.97	0	0.98	0.56
ANKRD26P3	0	0	0	0	0	0	0	0	0	0	0.22	0.32	0	0.48	0	0.19	0.17	0	0	0	0	0	0.09	0
ANKRD27	4.43	7.2	6.16	7.48	9.51	12.54	11.96	9.09	10.1	12.9	16.13	11.7	11.16	16.65	18.3	6.89	16.34	6.71	16.04	8.8	27.45	16	15.47	34.52
ANKRD28	22.94	21.64	20.36	53.17	34.47	16.72	14.4	23.29	17.41	20.38	38.07	25.41	44.08	26.24	23.03	19.98	18.99	19.97	19.56	19.3	34.36	21.38	21.69	21.79
ANKRD29	3.6	2.52	1.93	0.65	0.44	0.21	1.06	1.41	0	1.39	5.04	1.83	2.56	0.41	0.43	1.44	1.3	0.46	1.05	2.67	0.36	0	0.32	1.36
ANKRD30A	0	0	0.08	0.04	0	0	0	0	0	0	0	0	0	0.2	0	0	0	0	0	0	0	0	0	0
ANKRD30B	1.2	2.2	1.05	1.16	2.07	1.63	0.06	0.1	0	0.62	0	0.3	0	1.35	0	0.46	0	0	0	0.38	0.82	0	0.29	0
ANKRD30BL	0.1	1.1	5.2	1.56	0.42	0.57	0	0	0	0	0.58	0	0	0	0	0	0	0	0	0	0	0	0	0
ANKRD30BP2	1.64	1.39	4.24	1.83	2.06	0.87	0	0.04	0	0.07	0	0.15	0	0.23	0.17	0.11	0	0	0	0	0	0	0.1	0.14
ANKRD30BP3	0.61	0.44	0.96	0.68	0.74	1.64	0	0	0	0	0	0.16	0	0.98	0.17	0.59	0.17	0	0.16	0.1	0.22	0.26	0.27	0.94
ANKRD31	0.25	0.36	0.08	0.18	0.22	0.6	0.42	4.48	0	1.43	0.13	0.68	0.21	1.17	0.25	0.71	0.61	0.49	0.39	0.37	2	1.34	0.67	1.69
ANKRD32	3.96	2.17	2.02	2.49	0.18	2.45	0.71	1.58	15	2.54	3.19	1.69	1.13	3.55	3.16	3.14	2.66	1.64	1.53	3.09	4.46	5.01	2.41	3.2
ANKRD33	0.58	0	0.95	0.71	0	0.55	0	0	0	0	0	0.91	0.13	0.54	0	1.55	0.19	0.97	1.04	0.22	1.01	3.61	1.04	2.03
ANKRD33B	1.37	1.25	0.94	2.8	1.54	0.02	0.43	1.11	0.11	0.13	0.95	0.69	1.65	0.95	0.03	0.31	0.23	0.11	0.31	0.36	1.03	0.15	0.33	0.42
ANKRD34A	0.08	3.76	1.02	0.04	0	0.53	0	0.17	4.58	0.33	7.18	1.63	0.48	3.01	0.34	0.2	0.34	0.22	1.6	0.1	2.24	0.66	0.76	1
ANKRD34B	0.78	0	0.09	0.12	0	0	0.28	0	0	0	0.22	0	0.48	1.16	0	0	0	0	0	0.42	0	0	0	0
ANKRD34C	0	0	0	0	0	0.12	0	0	0	0	0	2.61	0	1.12	1.16	3.42	1.58	6.22	4.46	1.43	8.73	7.9	11.21	6.51
ANKRD35	0	0.18	0.1	0	0	0	0	0	0	0.36	0	0.7	0	0	0.46	0	0	0.1	0.21	0.4	1.06	0	0.1	0
ANKRD36	55.92	88.73	115.52	77.08	44.47	84.22	87.05	63.33	132.58	126.37	161.2	57.34	77.69	57.13	29.8	33.5	47.74	39.23	58.33	74.68	199.38	57.51	43.08	53.82
ANKRD36B	47.3	41.49	21.74	37.46	19.27	48.61	24.57	25.94	12.6	83.24	107.84	36.62	49.52	20.38	20.89	26.83	12.65	23.83	36.72	26.8	72.76	16.23	17.49	24.88
ANKRD36BP1	6.82	5.23	10.52	8.75	12.9	17.67	1.41	24.16	9.58	25.52	52.06	29.3	19.88	24.72	10.58	16.96	13.96	11.68	22.58	20.6	51.11	32.58	27.84	23.87
ANKRD36C	7.21	6.95	8.61	12.11	6.8	6.81	1.77	8.85	4.91	6.51	10.28	5.04	6.18	9.21	1.64	6.15	5.2	6.63	10.5	6.63	19.19	3.23	3.04	5.39
ANKRD37	11.71	12.49	8.96	8.95	10.99	5.42	52.94	34.21	16.85	39.99	21.87	7.05	20.8	2.46	3.43	7.65	3.8	7.26	3.9	20.32	10.62	15.01	21.06	22.42
ANKRD39	18.21	26.02	0.96	15.38	3.71	7.03	18.76	36.28	8.43	15.77	11.39	16.27	31.68	15.26	32.44	18.83	31.53	17.38	10.18	27.15	8.5	32.92	49.12	54.07
ANKRD40	21.05	28.68	22.41	16.48	30.4	29.37	13.21	24.37	60.01	22.32	29.68	19.64	36.07	21.3	22.31	21.12	28.91	12.31	24.21	25.55	28.52	55.66	45.34	75.81
ANKRD42	29.22	7.25	10.8	7.69	15.14	7.92	10.84	18.01	11.62	23.79	16.68	7.55	79.37	10.11	14.91	10.46	10.31	11.98	5.09	106.9	12.1	63.65	63.22	32.3
ANKRD44	13.04	8.45	8.9	13.02	9.73	6.99	1.84	8.01	4.88	7.03	4.04	20.14	15.4	21.47	11.09	11.35	8.67	5.37	8.8	5.55	20.87	5.79	6.08	6.89
ANKRD45	4.89	11.57	12.18	9.98	7.8	4.78	2.82	0.41	0.58	2.67	3.8	0.22	2.99	3	1.04	2.83	1.35	2.22	2.85	2.18	9.18	4.08	1.99	2.06
ANKRD49	2.65	3.11	4.27	2.06	1.41	4.82	3.97	4.19	9.56	3.5	4.7	13.26	16.26	21.27	17.13	13.36	12.36	6.02	20.71	4.45	26.22	14.15	13.18	16.89
ANKRD50	13.14	18.77	18.82	13.32	12.17	19.72	16.28	16.02	15.87	24.09	31.66	2.13	5.94	7.53	3.8	2.96	5.95	3.16	2.81	5.76	15.89	6.16	6.27	8.61
ANKRD52	12.76	19.73	20.36	21.98	36.96	25.15	12.26	16.87	32.1	23.09	25.28	37.63	10.34	62.69	13.66	9.9	12.52	27.34	36.36	12.07	48.56	19.5	17.72	20.03
ANKRD53	0	0.96	1.61	0.47	0.38	1.79	2.17	0.62	0.52	2.3	1.65	2.52	1.32	1.8	0.78	0	0.47	2.61	1.68	0.19	1.23	0	0.87	0
ANKRD54	6.55	17.68	20.72	15.66	24.24	38.64	36.78	20.46	27.7	18.39	39.17	11.07	24.17	27.77	20.51	7.82	20.79	13.94	9.93	41.36	14.44	26.14	19.42	28.81
ANKRD55	2.06	1.18	0.2	0.64	0	0.09	0	0	0	0	0	0.69	0	0	0	0.43	0	0	0	0.22	0	0	0	0
ANKRD6	12.89	4.3	8.33	4.76	5.86	12.51	2.51	0.89	2.44	3.22	6.1	3.12	2.82	3.14	2.97	0.69	2.21	9.98	20.72	31.8	39.47	8.69	21.82	17.45
ANKRD62P1-PARP4P3	0	0	0	0.1	0	0	0	0	1.37	0	0	0	0	0	0	0	0	0	0	0	0	0	0	0
ANKRD63	0	0	0	0	0	0	0	0	0	0	0	0	0	0.79	0	0	0	0	0	0	0	0	0	0
ANKRD65	45.87	63.66	57.46	31.03	113.19	173.02	42.75	36.21	20.63	81.8	55.43	22.06	63.56	20.14	59.26	33.71	38.27	17.16	17.76	59.72	25.29	70.06	57.03	77.72
ANKRD66	0	0	0	0	0	0	0	0	0	0	0	0	0	0	0	0	0	0	0	0	0	0	0	0
ANKRD7	0.11	0	0.13	0	0	0.12	0.16	0.69	0	0.55	2.46	1.33	1.63	1.33	0.93	0.27	1.64	0.74	1.77	0.57	2.45	1.81	0.26	1.48
ANKRD9	0	0	0	1.11	0.41	0	1.7	0.66	0	1.75	0	2.54	0.62	1.9	1.34	1.04	2.24	1.64	0.42	1.23	1.09	1.57	2.21	3.19
ANKS1A	21.5	41.91	44.43	29.44	31.02	108.86	27.97	12.43	39.62	37.7	56.89	47.14	44.27	104.39	28.52	14.91	29.83	20.14	43.86	30.3	37.33	23.35	38.55	38.12
ANKS1B	20.87	33.98	18.19	2.69	7.16	2.36	87.67	84.91	38.12	80.21	58.74	10.84	18.59	23.93	1.77	1.97	3.96	6.49	18.38	21.24	47.56	16.06	18.17	15.39
ANKS3	13.06	16.79	25.59	15.02	15.94	14.94	15.15	15.49	9.19	20.93	28.64	13.16	54.84	23.68	11.33	13.4	16.15	8.43	13.86	15.46	12.36	11.33	5.99	20.35
ANKS4B	4.03	4.83	6.35	3.76	3.65	2.77	0	0	0.89	0	2.24	6.72	0.75	3.4	1.91	0.25	0	0.57	0	0.13	0	0.17	0	0
ANKS6	12.63	6.5	3.82	1.74	6.6	8.06	8.08	3.16	25.89	10.96	8.52	2.58	8.07	9.66	7.68	4.58	4.64	2.24	4.3	5.76	8.98	7.71	6.21	9.02
ANKUB1	0.39	0.71	1.67	0.7	0.37	0.15	0	0	0	0	0	0.75	0.38	1.49	0	0	0	0.7	1.02	0.16	0	0	0	0.42
ANKZF1	10.14	27.98	25.11	22.04	12.19	12.09	10.96	18.44	35.07	25.98	16.06	12.52	23.47	15.68	32.61	20.84	26.52	11.16	32.41	21.9	50.98	43.15	30.59	53.81
ANLN	13.34	6.49	9.57	19.08	15.17	0.59	1.51	2.34	17.99	2.27	5.38	1.62	7.71	0.39	0.34	0.24	0.93	0.07	0.13	0.88	0.9	0.11	0	1.15
ANO1	0	0	1.29	0	0.18	0	0.7	2.53	5.72	0.57	3.1	0.84	0.62	0.42	1	0	0.52	0.63	0	0.36	0.44	1.17	0	0
ANO10	12.21	8.13	10.2	10.1	19.91	4.01	2.7	13.88	6.46	6.27	6.85	21.73	6.16	43.7	15.78	11.02	11.49	13.94	11.28	5.52	42.67	15.49	21.17	21.16
ANO2	0	0	0	0	0	0.04	0	0	1.52	0.22	0	0	0	0.4	0	1.45	0	0.15	0	0	0.36	0	0	0
ANO3	0	0.49	0.03	0.2	0	0.06	6.7	0.79	4.01	2.53	8.85	0.22	0.16	0.63	0	0	0.06	0	0	0	0	0.09	0	0
ANO4	0	0	0	0	0	0	0	0	0.22	0	0	0.26	0	0	0	0	0	0	0	0	0	0	0	0
ANO5	1.97	3.11	0.55	1.16	0.79	2.91	3.22	1.47	0	2.26	1.93	3.88	1.1	2.93	3.75	2.31	3.01	9.5	9.1	8.86	34.81	14.09	13.8	14.24
ANO6	13.33	12.85	14.4	14.59	20.31	9.32	5.25	9.89	18.91	12.92	23.66	10.65	9.44	10.5	6.14	11.74	4.67	0.82	2.47	2.93	2.9	1.12	1.92	0.49
ANO7	0.07	0	0.46	1.39	0.23	0.15	0	0	0	0.41	0.39	0.86	0.31	3.39	0.15	0.93	0.38	1.83	3.58	0.36	2.55	0.12	0.73	1.42
ANO8	0.44	3.87	5.11	1.69	5.45	1.33	2.57	1.71	2.34	2.9	1.75	6.51	4.15	9.41	0.88	1.99	2.01	6.57	3.23	1.99	5.07	1.61	1.89	2.94
ANO9	0.34	1.56	3.48	0.72	0	0	0.6	3.41	3.84	5.4	1.89	17.99	5.39	5.79	7.38	5.91	2.61	0.57	0.55	0.79	0.76	0.9	0.32	0
ANP32A	27.84	56.81	45.77	57.17	42.32	65.8	64.98	72.75	73.58	78.05	91.73	37.41	43.01	36.2	67.57	48.81	59.34	15.43	24.08	33.91	70.83	66.52	64.05	68.13
ANP32AP1	0	0	0.87	0	0	2.44	2.22	1.54	0	2.8	8.19	21.11	5.58	26.2	13.62	6.67	2.68	6.96	19.17	2.7	30.3	7.63	10.25	2.1
ANP32B	33.49	52.88	57.15	105.97	93.53	75.53	52.24	60.64	55.11	85.76	95.2	58.78	66.11	83.44	49.23	51.92	42.69	21.04	47.78	21.32	173.21	74.89	81.38	153.19
ANP32C	0	0	0	0.23	0	0	0	0	0	0	0	0	1.3	2.62	4.15	2.71	3.29	1.95	3.5	5.67	1.22	1.44	1.54	0
ANP32D	0	0	0	0	0	0	0	0	0	0	0	0	1.23	0	0	0	2.68	0	1.62	0	0	1.37	1.93	0
ANP32E	45.56	18.81	28.5	47.88	37.87	27.63	28.88	59.91	8.48	62.4	45.15	17.94	69.47	14.46	46.26	28.09	35.69	9.5	13.2	55.48	49.57	112.75	73.94	101.74
ANPEP	16.45	36.63	9.54	59.68	21.8	2.54	9.08	2.78	0.56	3.5	2.89	2.75	3.19	3.41	0	0.59	1.02	5.05	4.53	12.25	7.99	0.79	2.71	0.94
antibodies,	0.51	0	0	0	0	0	0	2.07	0	0	0	0.79	0	1.18	0	0	0	0	0	0	0	0	0	0.66
ANTXR1	0	1.5	8.31	0.61	1.09	0.03	1.53	4.18	33.46	0.61	6.46	2.22	1.37	1.89	4.81	0.46	1.96	3.82	3.58	4.13	16.51	8.07	2.53	3.07
ANTXR2	8.04	6.19	13.36	28.96	20.4	10.08	0.84	0.37	57.44	0.59	10.36	0	1.01	0.55	0.61	0.09	0.15	0.14	0	0	1.76	0	0	0
ANXA1	95.09	60.84	29.06	203.98	156.27	27.25	2.35	9.99	16.2	1.77	12	0.43	49.3	0.64	6.05	0.26	1.59	0.71	0.27	3.03	1.18	2.45	1	0
ANXA10	2.29	0.55	1.09	0.34	0.62	0.22	0	4.19	0	1.59	3.44	1.28	0.48	0	1.69	0	1.03	0	0	0.41	0.89	0	0.75	0
ANXA11	32.61	24.7	10.37	32.18	63.4	19.45	23.78	27.4	16.78	23.84	17.57	129.11	51.71	93.13	105.84	65.9	71.95	73.71	80.86	29.19	96.3	56.41	100.64	92.78
ANXA13	0	1.04	0.12	1.61	0	0.87	0.6	0	11.8	2.18	3.39	0	0.6	0	0	0.25	0	0	0.41	1.31	0	0	0	0
ANXA2	53.74	9.64	48.58	17.69	57.21	16.56	45.7	78.51	134.7	65.93	77.58	281.6	336.33	308.57	388.43	307.34	279.29	98.56	63.87	101.68	346.18	191.42	411.59	168.85
ANXA2P1	0.11	9.9	0	0.35	0	0.12	0.33	1.11	1.18	1.31	10.55	1.79	5.93	2.69	3.73	4.15	2.86	2.24	6.72	7.75	6.81	1.1	5.11	2.61
ANXA2P2	2.12	2.78	6.4	5.57	3.16	1.06	0.03	0	0	0	0	2.93	0	0	0	0.3	0	0.2	0	0.31	0	0	0.28	0
ANXA2R	0.11	0	0	2.01	1.07	0	0	0.12	0	0.78	0	0.95	1.05	0.71	0.25	0.29	0.25	0	0.48	0.61	0.66	0	0	0
ANXA3	25.11	70.67	7.75	59.26	60.97	21.61	3.77	6.01	11.65	2.13	2.04	3.32	1.63	2.22	0	0.91	7.43	1.24	1.11	2.13	4.59	2.11	5.36	1.85
ANXA4	15.93	20.19	15.94	15.05	38.25	8.68	61.11	43.85	75.82	65.24	66.87	27.58	58.72	30.03	51.88	26.56	46.93	5.47	5.31	15.07	8.84	16.92	16.73	19.84
ANXA5	158.96	175.86	165.72	92.32	169.06	168.09	138.58	234.19	176.04	172.99	217.26	122.57	220.97	128.2	179.84	174.09	149.77	80.48	99.26	119.92	223.44	151.91	278.43	257.95
ANXA6	34.05	53.79	63.55	37.83	73.57	74.8	32.54	57.41	51.24	55.12	58.23	121.5	50.31	90.19	62.84	41.32	54.15	70.37	33.65	40.76	76.01	29.69	33.18	52.73
ANXA7	45	54	59.66	39.61	48.29	57.84	206.48	122.73	107.02	152	155.83	216.3	183.08	185.85	218.67	186.39	207.38	95.44	84.94	118.87	324.65	211.8	229.69	182.56
ANXA8	0	0	0	0	0	0	0	0	0	0	0	0	0	0	0	0	0	0	0	0	0	0	0	0
ANXA8L2	0	0	0	0.34	0.18	0	0	0	0	0.26	0.46	1.44	0.47	0	0	0.59	0	0	0	1.87	0	0.26	0.93	0
ANXA9	0.85	0.56	0.65	0.86	2.1	2.26	0.71	0.84	4.86	1.48	2.71	1.96	0.72	2.46	1.19	0.4	0.17	1.46	0.98	0.21	3.16	1.33	2.46	2.18
AOAH	4.52	2.97	7.59	8.12	6.56	12.03	0.28	0	0	1	2.01	1.01	0.93	0	0.26	0.46	0	0.68	0.76	1.29	0	0.21	0.59	0.84
AOC2	1.22	10.56	0.65	1	0.5	3.66	3.31	2.59	0.2	4.27	6.12	3.11	7.33	5.35	3.58	3.67	2.3	2.23	2.45	3.4	2.45	3.8	1.93	2.58
AOC4	0	0	0.15	0	0	0	0	0	0	0.44	0.4	2.58	1.34	0.86	0	0.18	0.45	1.28	0.29	0.55	0	0.23	0	0.91
AOX1	1.17	0	1.26	0.87	0.11	0.63	1.87	5.81	0.29	11.2	9.02	17.05	26.03	13.48	18.08	18.27	18.06	0.8	0.24	1.88	2.29	1.6	1.61	0.41
AOX2P	0.61	0.25	0.29	1.33	1.87	0.3	0	0	0	0	0	0.63	0.23	0.24	0.57	0.58	0.17	0	0	0	0	0.13	0.18	0
AP1AR	4.13	3.53	3.94	7.38	8.21	29.45	12.62	16.93	21.92	15.78	12.78	12.81	17.12	9.19	22.03	10.44	11.89	2.84	6.11	15.78	24.85	25.93	26.39	54.65
AP1B1	25.77	21.13	22.27	25.83	15.53	47.69	27.14	41.24	24.41	33.95	40.36	61.35	40.12	79.83	59.27	25.55	41.29	36.19	25.9	33.83	54.5	31.76	32.05	43.67
AP1B1P1	0	1.05	0	0	0	0	0	0	0	0	0	0	0	3.32	0	0	0	0	0	0.48	0	0	0	1.24
AP1G1	59.13	50.01	67.49	39.79	49.03	70.53	110.77	115.19	88.21	123.29	123.12	121.31	150.73	84.44	84.9	91.44	63.24	48.2	45.12	75.09	92.84	70.87	70.2	59.74
AP1G2	74.09	67.08	38.98	91.28	48.16	66.49	72.15	86.07	44.28	100.14	54.74	82.07	54.75	109.83	117.67	55.82	114.18	62.24	94.31	54.19	146.61	80.98	90.47	142.5
AP1M1	8.23	10.1	11.51	15.7	19.46	15.61	11.41	11.97	15.11	5.26	10.41	19.14	5.75	29.21	10.56	3.64	13.57	14.76	8.08	10.02	19.89	9.47	10.97	14.85
AP1M2	8.34	8.81	11.4	14.11	12.5	14.29	40.72	21.88	26.84	27.27	12.25	42.23	22.78	40.98	23.45	22.96	25.22	26.18	13.63	11.12	30.1	14.18	24.49	26.09
AP1S1	4.74	5.8	6.44	4.77	3.73	3.45	7.3	3.72	5.71	6.12	14.16	33.36	3.76	28.56	5.82	7.97	7.63	18.86	10.67	2.98	19.9	12.14	11.86	7.74
AP1S2	3.45	5.18	5.05	8.98	16.31	1.97	3.52	5.69	4.97	6.42	8.51	8.28	9.79	11.84	9.26	4.54	5.24	0.64	5.82	3.85	4.47	4.57	3.8	4.26
AP1S3	9.81	11.67	21.6	11.24	13.25	10.26	5.02	2.87	3.41	4.81	5.58	9.54	2.23	12.9	4.71	2.5	2.09	1.4	4	2.63	8.27	5.66	4.29	5.35
AP2A1	4.06	19.15	20.08	15.98	10.69	12.94	14.46	6.75	12.45	8.72	17.39	58.95	8.43	53.81	13.07	6.28	7.74	35.84	33.91	9.14	33.71	8.24	11.37	14.37
AP2A2	24.05	18.62	28.63	15.69	41.97	34.8	24.02	30.07	37.94	21.41	28.36	81.5	56.57	97.75	40.12	32.56	26.65	33.48	30.06	28.47	40.48	26.76	28.01	22.98
AP2B1	54.47	82.58	65.39	46.4	73.45	86.33	101	93.83	116.67	117.16	124.34	121.24	70.65	103.5	77.95	63.43	81.15	74.52	60.28	51.21	142.7	80.82	92.88	118.14
AP2M1	73.62	122.46	90.01	63.29	53.36	191.86	124.24	116.47	167.38	140.28	110.7	103.15	132.82	116.44	135.66	63.31	102.63	74.83	28.18	68.19	105.69	84.63	94.63	116.65
AP2S1	3.38	21.61	5.43	21.25	19.06	11.97	15.91	40.73	9.72	38.4	33.54	31.82	18.09	25.67	36.35	12.25	16.47	16.02	10.96	7.52	12.4	7.32	18	16.09
AP3B2	34.74	29.57	14.58	23.05	47.48	69.12	39.65	25.89	60.51	51.38	27.57	45.57	81.33	55.76	55.13	53.91	76.69	35.47	29.68	67	59.43	35.31	51.53	77.98
AP3M1	41.58	36.46	58.22	36.47	34.59	41.08	32.43	39.64	56.64	42.78	60.21	27.09	19.41	29.88	31.93	29.67	34.74	11.78	12.34	14.52	35.73	28.09	25.64	36.95
AP3M2	3.59	2.79	10.48	2.07	15.36	8.26	7.82	10.3	48.28	12.55	15.28	3.89	4.3	8.18	3.74	2.33	7.3	3.85	7.03	8.73	18.86	12.32	7.79	9.76
AP3S1	30.04	16.84	15.81	39.74	23.19	11.53	15.54	16.8	27.09	20.18	16.05	12.59	15.13	7.71	25.86	16.62	21.3	5.2	0.93	6.59	10.34	23.29	9.22	15.19
AP3S2	13.22	15.59	15.79	11.46	8.82	13.75	8.39	26.47	15.62	21.33	28.25	10.16	24.52	10.97	30.11	19.06	25.06	8.43	11.84	11.15	12.89	23.62	14.3	32.48
AP4B1	14.52	20.8	23.54	19.53	14.32	20.56	5.59	12.14	22.17	14.19	9.29	8.71	20.49	9.76	10.73	5.89	15.45	6.25	11.97	16.32	17.11	12.58	10.92	24.58
AP4E1	6.92	10.11	10.44	11.77	8.75	9.01	6.07	4.4	1.73	13.91	12.07	4.94	6.41	7.07	4.09	1.85	4.14	3.83	3.94	4.29	7.66	4.65	4.59	9.73
AP4M1	3.03	2.65	4.26	4.69	2.14	0.53	6.59	8.66	0	6.6	7.13	4.05	3.2	5.19	9.41	3.72	5.9	4.24	5.24	2.22	11.3	6.01	5.58	10.89
AP4S1	14.79	19.3	29.03	20.59	18.39	10.6	1.76	10.19	1.72	5.85	6.17	11.22	6.99	5.5	2.68	4.32	1.84	3.59	8.43	3.31	7.26	3.85	2.53	4.33
AP5M1	3.9	11.68	8.75	8.23	2.58	12.28	24.08	14.66	57.75	20.58	30.65	23.54	22.35	23.79	28.78	14.02	14.9	15.64	23.52	21.77	47.93	37.17	29.55	27.87
AP5S1	2.87	6.53	6.8	2.89	9.1	5.87	9.63	15.92	17.88	4.87	6.83	11.18	7.03	14.91	9.44	4.04	8.19	9.31	9.13	5.49	14.18	5.92	5.16	10.43
AP5Z1	4.54	4.54	8.14	5.21	5.8	3.76	4.06	2.64	8.58	5.79	5.49	16.49	4.29	12.24	5.86	7.97	3.24	10.21	7.97	2.44	6.07	5.81	6.21	6.18
APAF1	25.18	16.95	15.9	20.14	25.83	15.77	5.75	11.58	12.8	6.81	13.28	6.19	5.29	7.17	4.08	4.29	5.13	1.84	5.33	5.82	11.09	6.37	6.37	8.05
APBA1	3.86	0.36	4.91	1.06	16.08	2.35	14.58	14.37	16.85	14.43	11.36	3.12	5.28	5.11	4.58	2.77	4.35	10.46	8.94	8.51	23.97	15.26	13.39	18.47
APBA2	6.39	2.46	5.89	6.57	3.88	3.69	2.19	0.08	4.42	0.72	2.22	1.16	0.46	0	2	0.39	0.41	0	0.16	0.23	0.87	2.55	0	0.44
APBA3	0.39	1.17	5.53	4.06	5.09	2.78	3.1	2.45	9.45	0.68	3.42	6.27	2.63	7.87	4.24	1.4	2.42	4.44	7.17	1.88	1.9	4.54	3.42	3.81
APBB1	11.18	26.49	35.86	20.05	15.94	34.51	65.7	62.83	23.07	57.04	76.34	150.55	87.69	156.38	60.2	50	40.49	71.36	40.63	96.48	63.16	48.21	36.78	27.62
APBB1IP	8.31	15.97	5.81	16.62	23.78	1.61	0	0.39	0.59	0.92	0.83	0	0	0	0	0	0	0.17	0	0.62	0	0.25	0.17	0
APBB2	6.59	4.98	13.46	8.47	14.85	10.2	8.02	9.15	23.31	17.54	26.95	21.29	12.44	32.09	7.65	13.25	11.21	9.99	29.94	10.64	27.91	11.49	10.63	14.87
APBB3	5.27	19.72	35.21	8.58	4.36	12.66	11.19	7.1	8.12	15.61	10.43	15.25	16.11	22.08	9.23	8.87	7.79	20.65	32.96	10.78	24.51	26.82	12.85	27.44
APC	28.04	23.51	19.43	20.85	13.57	28.38	37.41	30.8	34.07	50.57	49.68	47.23	28.78	39.7	24.08	23.42	32.48	26.35	31.28	36.43	77.31	33.22	39.23	52.75
APC2	1.12	0.67	1.51	0.55	1.06	0.88	1.29	0.45	1.5	0.11	0.74	2.62	1.01	1.82	0	0.49	0.16	1.03	1.2	0.03	1.08	0.09	0.09	0.22
APCDD1	0	1.18	8.72	0	1.34	0.06	3.36	11.47	37.49	4.64	10.83	1.39	0.34	0.7	0.36	0.14	0.73	0.13	0.23	0.59	0.64	0.38	0.4	0.58
APCDD1L	7.18	2.16	1.56	0.7	1.16	2.73	0	0.15	0	0.16	0	3.6	4.45	4.29	3.06	4.41	3.9	15.9	12.37	9.62	9.66	19.45	11.32	23.33
APCDD1L-AS1	0	0.08	1.02	0	0	0.38	0	0	0	0	0.39	2.2	2.69	2.18	2.69	0.78	0.37	7.09	6.86	6.18	21.87	7.11	6.43	15.62
APCS	0	0	0	0	0	0	0	0	0	0	0	0	1.45	0	0	0.4	0	0	0	4.21	0	0.54	1.14	0
APEH	17.91	8.79	8.64	24.53	17.96	12.39	23.22	32.47	15.89	35.38	33.67	24.89	19.19	28.77	30.59	13.9	19.34	17.13	13.54	18.48	25.39	33	24.85	39.03
APEX1	158.18	123.52	243.78	148.12	235.2	241.16	88.74	115.89	139.72	109.51	169.23	60.38	114.25	71.83	110.04	64.17	89.86	24.85	40.58	89.6	49.38	105.98	101.71	155.21
APH1A	2.36	3.87	6.74	7.95	3.71	3.86	4.19	9.35	6.69	6.72	8.95	31.83	9.13	24.64	10.03	5.29	5.37	25.8	12.29	8.36	26.02	18.08	13.19	15.26
APH1B	8.54	11.91	8.09	7.41	11.01	10.55	23.24	36.29	39.24	29.02	22.95	11	19.32	13.13	31.08	16.03	18.64	10.04	9.72	20.79	23.15	38.92	25.61	21.67
API5	24.2	26.76	34.02	16.33	18.31	53.73	38.1	42.39	43.31	57.99	48.22	46.28	90.58	47.51	69.29	46.31	59.84	21.47	31.6	52.51	99.38	84.29	78.66	82.34
APIP	2.94	10.13	7.06	2.92	2.17	15.23	34.76	17.85	2.53	26.91	25.25	28.34	33.86	15.81	18.35	21.26	27.32	8.83	7.74	16.97	34.05	22.63	16.14	28.77
APITD1	1.53	1.16	2.03	4.09	2.02	3.24	6.03	5.15	7.67	14.35	12.11	3.87	15	8.73	4.81	5.06	7.2	2.16	5.33	5.6	10.07	13.48	12.96	6
APITD1-CORT	1.1	0.84	8.48	2.06	0.72	1.25	3.26	3.23	3.13	9.09	12.97	6.07	9.27	8.03	6.75	3.83	4.49	5.46	7.58	3.43	4.31	9.1	5.18	9.4
APLF	1.64	3.98	1.27	9.71	4.61	1.15	18.67	8.13	1.9	4.43	5.98	5.95	3.18	8.45	2.49	1.59	6.51	3.47	6.95	1.67	11.91	1.05	1.24	5.06
APLN	0	0.16	0.47	0	0	0.05	0	0.33	0	0	0.25	0.37	0	0.55	0	0	0.39	0	0.92	0.35	1.01	0.15	0.21	0.76
APLNR	0.36	0	23.63	1.37	3.45	0.28	2.57	3.08	7.48	0.25	5.22	0.31	0.89	0.23	0	0	0.08	0	0	1.57	0	0.37	0	0
APLP1	87.49	130.28	93.91	80.38	117.46	136.28	223.55	162.7	98.58	147.08	148.58	309.25	129.81	299.09	119.24	137.8	116.33	183.65	165.31	85.6	162.63	79.32	108.76	136.5
APLP2	46.1	67.01	116.19	80.04	66.49	95.17	98.8	96.99	178.24	115.27	149.36	97.84	173.65	139.57	265.07	139.37	217.97	99.92	98.08	211.11	310.72	365.36	372.08	420.7
APMAP	95.54	79.72	52.55	90.54	114.61	64.2	48.04	70.62	93.48	52.08	75.94	46.96	49.11	89.17	114.79	52.63	85.17	58.07	36.71	38.7	70.47	123.87	115.1	113.01
APOA1	0	0	0.19	1.25	0	0	131.95	10.45	1.81	2.54	10.45	0	0	0	0	0.84	0	0	0	0	0	0	0	0
APOA1BP	19.2	73.64	20.31	13.78	22.01	68.6	51.15	60.28	7.61	35.46	57.01	46.05	31.04	76.86	108.49	52.52	104.75	28.5	20.77	23.57	41.87	49.51	43.58	92.93
APOA2	21.61	24.88	7.96	34.93	11.62	0.71	654.03	8.57	0	0	0	0	0	0	0	0	0	0	0	0	0	0	0	0
APOA4	0	4.43	0	2.38	0	0	0	12.1	0	0.34	7.96	0	0.3	0.62	0	0	0	0	0	0	0	0	0	0
APOA5	0.07	1.08	0	0	0	0	0	0	0	0	0	0	0	0	0	0	0	0	0.34	0.22	0	0	0.36	0
APOB	0.8	1.86	0.33	1.31	0.45	1.53	34.33	2.89	0.04	0.03	8.79	0.08	0	0.31	0.11	0.23	0.11	0	0	0	0	0.03	0.02	0.03
APOBEC1	0	0	0	0	0	0	0	0	0	0	0	0	0	0	0	0	0	0	0	0	0	0	0	0
APOBEC2	3.3	5.3	1.04	1.29	8.71	0.11	0.3	0.95	3.95	8.75	1.7	4.09	3.91	3.07	3.05	3.59	0.87	6.93	7.78	9.84	8.59	22.09	12.95	12.62
APOBEC3A	14.19	41	30.74	21.56	22.19	8.11	0.32	0.78	3.17	0.19	0.6	1.86	3.63	3.89	2.8	2.38	0.23	1.9	0.92	0.82	0	1.58	0.5	0
APOBEC3C	19.54	2.31	1.9	8.94	11.85	0	6.8	6.51	2.4	5.86	4.55	3.27	3.22	1.64	2.57	1.34	0.29	4.86	0.55	1.4	1.51	4.91	0	0.46
APOBEC3D	9.59	14.06	17.23	9.02	10.89	6.97	4.79	4.74	4.53	1.75	1.37	3.74	2.8	4.14	2.81	1.5	1.91	1.1	0.77	1.28	1.72	0.4	0.58	0.25
APOBEC3F	2.76	1.47	4.72	3.63	2.97	2.19	6.64	11.57	4.6	19.39	9.64	9.42	7.13	11.39	8.69	8.86	7.16	3.19	4.49	3.89	13.58	5.55	8.54	5.07
APOBEC3G	1.38	7.6	0.59	2.36	3.61	0.46	3.27	8.55	0.4	4.95	0	3.64	1.37	2.45	3.38	5.16	2.71	0.9	0.23	1.51	0.93	4.91	1.76	4.26
APOBEC3H	0.19	0	0	0	0.19	0	0	0	0	0	0	0	0.86	0.87	0	0	0	0.65	0.58	0.37	0	0	0	0
APOBEC4	1.82	3.89	6.21	1.88	1.23	21.97	1.16	3.95	2.23	3.15	12.13	2.74	5.26	1.65	0.66	0	1.46	7.02	3.63	54.77	11.14	26.12	15.95	19.23
APOBR	3.79	18.5	5.37	17.21	16.78	1.12	0	0.04	0	0	0	0	0.12	0.5	0	0	0	0	0	0.11	0	0	0	0
APOC1	0	0	14.85	5.31	0	0.53	122.61	3.31	0	0.87	8.81	0	4.64	0	16.42	5.12	0	1.12	0	5.43	5.83	1.71	0	0
APOC1P1	2.3	6.94	5.92	5.69	5.13	1.81	0.37	0	0	0	0	0	0	0.97	0	0.61	0	0	0	0	0.9	0	0	0
APOC2	0	0	3.87	0.83	0.21	0	0.64	0	0	0	0	1.11	0	0.97	0	0	0	0	0	0	0	0	0.38	0
APOC3	0	0	0	0	0	0	145.59	20.3	0	0	5.03	0	0	0	0	0	0	0	0	0	0	0	0	0
APOC4-APOC2	0	0	0.63	0.37	0.27	0	17.26	0	0	0	0.9	0.41	0	0	0	0	0	0	0.33	0	0	0	0	0.27
APOD	0.13	0.46	7.42	0	0	0	2.16	0	5.19	0	3.72	0.87	0.39	0	0	3.94	0	4.17	0.53	5.16	3.71	1.75	2.18	0
APOE	0	2.03	5.5	0.4	0.66	1.49	18.17	6.1	23.42	6.33	10.66	0	1.51	0.77	0.27	0	0.54	0	0.51	4.6	1.42	0.42	1.19	0.43
APOF	0.08	0.21	0.55	0.4	0	0.63	0	0	1.86	0.29	0.49	1.77	5.46	0.53	2.21	0.65	0	1.58	0.71	1.58	0.49	0.87	1.44	0.29
APOH	0	0	0	0	0	0	71.17	30.19	9.28	27.76	6.98	273.32	261.44	145.46	78.01	83.88	41.6	0	1.51	3.55	0.7	2.05	2.04	0
APOL1	4.83	6.05	9.57	3.56	4.54	2	0.1	0	2.88	1.14	2.28	2.63	17.36	3.47	3.98	0.83	1.72	3.07	1.34	4.46	2.28	3.59	3.03	1.38
APOL2	11	13.4	7.37	6.18	4.98	19.61	11	14.3	13.22	13.44	10.9	5.35	19.64	14.38	22.08	13.09	14.98	16.76	10.03	29.12	49.03	33.54	47.09	45.46
APOL3	0	0	2.72	0	0	0	0.61	0.22	0	0	0	4.09	0	3.09	0.17	0.5	0.56	0	1.04	0	0.77	0	0.1	0.47
APOL4	22.33	17.31	22.01	18.83	22.86	11.71	0.27	0.58	0.32	0.52	4.03	2.77	1.14	1.93	0.48	0.67	0.77	2.35	2.57	1.17	2.01	0.6	1.17	0.91
APOL5	0	0	0	0	0	0	0	0.54	0.73	1.37	0.58	0	2.46	1.25	0	0	0.44	0.7	0	0.27	0	0.34	0	0
APOL6	7.08	5.75	3.86	2.47	3.13	2.54	0.73	0.68	8.76	1.55	1.5	9.5	6.03	22.36	9.4	5.98	5.7	11.23	16.66	4.99	39.08	9.6	10.71	13.35
APOLD1	1.77	0.52	2.12	1.34	7.43	0.26	0.69	1.59	2.86	1.29	1.74	1.39	0.46	0.38	0.26	0.39	0.47	0.35	0.63	2.9	2.44	0.91	1.03	1.58
APOM	22.42	0.92	24.91	1.91	0	0.86	25.39	4.44	0	7.4	2.27	1.61	3.6	2.42	2.98	5.49	4.33	2.25	0.81	1.05	0	6.65	4.25	1.36
APOO	15.57	13.06	23.82	5.51	2.61	20.11	36.76	27.16	35.35	39.58	38.51	16.54	27.19	12.05	25.29	22.09	42.32	7.84	3.75	22.06	24.74	28.21	22.35	25.34
APOOL	10.13	14.35	18.6	11.19	15.88	17.42	26.04	16.94	26.6	26.42	32.85	26.2	10.15	22.18	15.69	14.16	11.68	10.2	16.83	12.36	30.46	16.21	16.2	17.88
APOPT1	25.41	12.35	16.9	14.95	5.07	17.74	36.13	8.49	22.75	20.87	27.06	4.95	17.98	3.81	21.79	17.97	13.99	2.44	2.43	13.15	3.57	21.59	17.53	34.22
APP	164.68	195.81	195.04	174.26	209.26	339.97	233.48	227.78	217.27	324.52	303.16	467.57	548.71	572.51	789.74	440.07	707.88	297.51	285.25	370.09	900.4	821.27	853.19	1056.09
APPBP2	11.73	16.88	16.96	7.85	7.85	12.77	26.3	31.31	27.37	34.08	34.46	13.44	12.2	17.21	16.25	10.46	18.69	5.68	12.73	14.03	18.92	20.77	15.41	29.63
APPL1	18.82	11.43	16.09	18.44	6.14	20.69	20.2	22.39	24.11	29.5	33.35	20.64	36.27	45.39	21.14	16.91	29.62	14.63	17.14	23.93	64.02	49.8	42.12	59.5
APPL2	52.35	32.18	36.09	28.52	14.76	42.86	64.43	42.15	30.99	65.6	42.72	42.88	28.95	32.87	36.61	29.22	41.88	49.02	30.53	36.15	73.69	41.1	37.42	61.38
APRT	19.7	12.65	42.86	15.13	66.41	58.57	59.14	67.83	69.8	63.65	28.03	39.01	34.67	24.12	130.84	67.17	105.21	12.36	6.43	34.36	10.83	65.28	64.59	72.24
APTX	3.34	9.78	24.77	9.24	8.96	26.01	8.45	19.1	59.42	24.33	18.37	21.65	24	18.28	39.7	25.47	32	15.42	8.55	16.79	28.89	36.64	30.08	48.04
AQP1	2.61	1.18	10.99	0.19	0.31	2.33	2.12	2.26	3.4	1.8	2.68	1.71	11.97	3.81	0.25	1.34	0.9	1.29	0.63	6.22	0.67	2.78	3.67	1.4
AQP10	0.08	0	1.79	0	0	0	0.73	2.15	2.04	1.91	2.76	3.33	0.24	1.5	0.52	1.84	2.99	0.56	0.33	0	0	0	0	0
AQP11	9.64	4.94	1.1	2.04	0.62	10.37	8.65	8.49	3.73	11.28	9.62	3.59	5.4	6.23	5.45	5.93	7.99	2.77	5.79	4.76	5.87	6.32	2.46	6.11
AQP12A	0	0	0.89	0.74	0.31	0.44	17.01	4.79	0	2.77	0	0.29	1.22	0.44	0.05	0.12	0.21	1.82	0.79	9.49	0.27	0.4	0.8	0.08
AQP12B	0.26	0	0.89	0	0.05	0	0	6.2	11.57	1.02	3.65	0.29	3.88	0.44	0.05	0.12	0	1.01	0.79	6.6	0.27	0.4	0.18	0.08
AQP2	0.37	0	0	0.07	0	0	0	0	0	0.06	0	0.56	0	0.21	0	0.17	0	0.39	0.42	0.09	0.19	0	0	0
AQP3	0	0.62	0.2	0.29	0.47	0	23.54	0.75	40.84	2.54	7	18.92	5.89	9.58	25.51	2.92	9.25	39.03	14.38	11.39	14.53	44.76	43.9	5.72
AQP4	1.78	5.03	0.46	3.85	0.52	2.84	3.03	7.53	1.79	4.73	6.93	2.76	6.63	0.87	4.35	4.06	7.12	0.77	3.11	2.63	2.05	3.08	2.19	5.14
AQP4-AS1	6.06	8.35	11.43	4.91	9.99	8.62	5.9	7.74	5.63	14.61	16.17	3.74	9.34	2.71	4.42	6.09	9.36	0.72	3.23	5.4	6.15	3.1	4.31	7.86
AQP6	2.47	3.45	4.15	3.85	3.88	1.34	0	0	0.22	1.28	0	0.51	0.74	0.17	0	0.72	0.13	0.19	0.46	1.75	0	0	0	0
AQP7	0	0	0.13	0.3	0	0.83	0.39	0.66	0	0.73	0.73	12.96	3.52	10.75	5.11	3.06	4.44	3.9	5.58	1.54	4.19	0.73	1.31	0
AQP7P1	0	0.11	0.37	0.05	0.66	0.54	1.06	0.05	0	1.06	2.22	2.52	0.14	3.14	0.19	4.81	1.17	3.39	3.14	0.36	1.93	0.3	5.17	0.46
AQP7P3	0	0	0	0.31	0	0	1.41	0	0	0	0	0	0	0	0	0.79	0.64	2.58	0	0	0	0	0	1.01
AQP8	0	0	2.6	0	0	3.3	19.17	2.38	2.83	0.19	0.64	2.3	1.69	0.69	0.48	3.67	0.24	0.26	0	3.24	0	2.26	2.41	0
AQP9	3.44	46.52	1.61	10.92	10.46	0.36	0	0	0	0	0	0	0	0.34	0	0	0	0	0.22	0	0.31	0	0.13	0
AQPEP	0.13	0	0.15	0	0.16	0	0	0	6.11	0	0	0	0.13	0.27	0	0	0	0	0	0	0	0	0	0.15
AQR	9.36	14.75	13.99	11.58	10.92	11	22.42	21.49	37.47	23.56	25.25	38.55	22.77	31.42	20.37	19.13	20.32	15.26	20.53	15.1	44.17	23.49	25.75	28.98
AR	0.89	0.04	2.83	0.06	0.17	0.12	0	0.37	0.45	0.06	0.69	0.72	2.11	2.24	2.11	0.66	1.82	0.16	0.15	2.71	0.51	0.47	0	0.3
ARAP1	18.6	18.54	10.52	20	13.77	11.19	7.63	10.3	12.67	10.18	6.57	48.54	9.24	54.15	8.73	8.1	8.32	28.7	33.08	6.39	52.55	10.64	10.78	16.2
ARAP2	2.4	3.53	0.97	3.71	8.27	0.61	6.52	9.42	0.33	11.37	5.58	0.64	3.53	0.72	0.1	0.15	0.7	0.21	0.57	2.54	1.56	0.26	0.33	0
ARAP3	1.41	5.18	7.03	8.86	7.51	0.2	1.08	0.1	3.22	0	1.78	2.56	0.9	1.4	0.96	0.23	0.2	0.85	1.42	0.24	0.77	1.36	0.75	0.46
ARC	0	0.29	3.59	2.54	10.09	2.83	10.95	0.92	15.16	13.37	7.74	0.51	2.24	0.76	0	0	0	0.85	0.51	0	0.7	0	0	0
ARCN1	132.78	121.73	151.8	88.63	108.49	196.47	182	179.06	201.26	190.56	183.98	134.63	208.45	135.01	200.36	167.53	203.06	65.61	72.91	172.24	157.04	191.23	213.48	245.05
AREG	0	1.36	0.2	1.01	1.54	0	3.05	0.25	0.21	0.88	0.66	0	0.18	0.36	0	0	0	0	0	0.31	0.33	0.58	0.14	0
AREL1	23.78	35.64	45.87	47.62	65.56	45.16	29.82	33.72	31.75	37.51	46.5	28.83	30.99	35.08	43.84	28.23	35.05	13.52	18.68	23.71	29.06	43.92	34.79	66.42
ARF1	388.67	461.36	568.41	423.25	340.19	602.24	365.51	455.21	510.04	439.29	392.87	344.09	476.8	325.64	480.95	366.07	371.87	183.56	138.88	322.35	231.53	357.87	334.88	328.53
ARF3	26.53	44.98	31.66	50.09	74.86	52.55	58.79	57.29	65.44	87.16	95.01	190.3	127.36	146.53	171.39	106.84	114.62	78.13	75.97	101.73	114.85	109.05	126.68	137.86
ARF4	72.87	44.26	61.16	27.96	48.99	83.16	255.45	168.88	170.83	175.51	105.25	140.89	66.55	103.17	64.57	60.08	83.08	55.85	71.09	88.67	153.38	87.3	92.53	92.82
ARF5	62.84	26.26	36.07	36.07	17.61	14.37	40.99	68.99	75.06	23.12	56.34	109.41	30.89	80.27	31.61	34.54	35.51	77.24	62.14	39.72	69.58	24.95	28.81	45.38
ARF6	18.63	111.08	81.15	119.71	38.78	84.64	37.12	77.05	114.27	39.12	71.45	65.54	80.24	101.31	46.61	29.69	49.7	27.21	28.42	37.23	26.25	29.28	23.03	48.35
ARFGAP1	11.1	9.54	26.41	8.58	2.37	20.25	14.01	8.16	24.66	21.46	18.66	49.17	22.9	76.94	23.24	10.18	18.86	46.67	56.03	19.75	32.33	26.44	12.8	24.76
ARFGAP2	6.74	11.21	16.31	19.52	14.08	20.62	13.52	19.22	26.65	30.61	24.41	45.53	26.25	49.34	21.12	17.74	19.23	29.48	30.29	24.27	53.42	21.95	25.5	32.46
ARFGAP3	19.32	33.97	25.11	24.09	15.37	40.02	58.68	59.86	47.55	34.34	51.72	46.14	56.56	39.22	56.48	43.26	49.44	27.63	21.34	49.82	58.32	92.08	89.09	82.73
ARFGEF1	33.29	25.01	27.11	44.39	38.5	23.57	35.93	30.51	40.54	40.76	51.96	50.2	57.12	43.79	45.42	40.64	44.63	16.77	40.28	31.3	82.48	39.61	48.06	45.39
ARFGEF2	13.5	18.64	13.36	13.58	14.08	26.41	25.75	34.31	35.83	35.01	42.45	43.49	78.16	37.12	61.27	38.98	45.66	27.64	23.03	68.3	55.95	84.67	68.21	88.76
ARFIP1	8.35	8.33	8.52	2.52	5.09	10.06	7.49	9.69	17.49	27.06	19.53	12.51	8.23	17.17	20.99	14.05	17.79	7.64	12.54	8.83	18.45	21.65	18.4	26.82
ARFIP2	14.7	17.73	34.27	28.45	12.25	31.88	17.65	27.05	21.64	25.84	31.35	121	58.96	86.02	63.4	52.25	36.68	39.66	42.32	49.53	70.03	35.71	46.29	48.13
ARFRP1	1.47	1.07	2.82	1.31	9.28	9.05	5.12	0.92	2.25	5.12	4.1	3.98	5.1	8.69	4.55	2.55	2.93	3.89	3.59	5.45	7.38	3.72	7.83	5.94
ARG1	115.01	89.69	18.92	117.69	76.33	7.84	10.25	0	0	2.27	0.69	3.66	2.4	6.12	1.31	1.54	3.18	1.82	2.04	1.54	1.13	4.5	1.42	5
ARG2	20.88	34.51	14.43	11.38	6.97	46.88	51.23	55.72	37.09	72.56	40.73	46.69	26.33	12.15	58.03	29.56	19.85	34.7	23.57	59.51	36.4	159.66	125.5	192.86
ARGFX	6.12	9.21	14.69	8.91	11.74	5.97	0	0	0.2	0	0	0.12	0.23	0	0	0.07	0	0.13	0.12	0.22	0.16	1.41	0.13	0
ARGLU1	40.98	61.69	77.5	73.93	51.03	42.45	80.24	76.65	182.91	125.92	140.44	89.94	100.56	99.08	86.18	95.8	94.25	44.71	69.05	53.7	204.14	67.88	68.37	77.57
ARHGAP10	0.46	0.57	4.27	3.57	4.3	0.36	5.94	7.1	18.57	10.51	9.77	18.41	14.82	9.87	24.48	9.88	5.56	2.56	2.66	6.22	11.85	8.64	8.66	7.56
ARHGAP11A	3.77	3.48	3.25	8.8	3.96	2.54	3.14	5.29	18.24	4.1	5.58	0.89	10.22	5.06	0.54	4.41	7.18	1.15	1.09	4.12	3.47	3.05	1.86	3.53
ARHGAP11B	8.95	2.75	6.56	4.5	10.47	0	0.66	0.41	6.16	0.62	17.26	0.88	4.32	0.89	0	1.46	2.34	0.42	0.76	0	1.24	0.65	1.06	1.1
ARHGAP15	9.5	11.9	6.6	23	27.38	4.8	0.58	0	16.8	6.56	2.21	0	0	0	0	0	0	0	0	0	0.73	0	0	0
ARHGAP17	28.15	28.68	40.13	32.16	65.81	71.5	22.43	20.13	19.83	28.68	43.36	30.35	58.75	32.91	26.7	22.86	29.4	22.29	21.31	23.29	32.13	18.65	24.17	29.3
ARHGAP18	8.78	16.26	6.58	10.28	40.8	14.45	10.62	21.24	12.9	18.23	11.82	0.83	2.84	1.24	0	0.32	0.28	4.61	2.37	15.61	14.05	8.16	9.67	14.66
ARHGAP19	1.82	2.17	1.53	5.43	5.91	0.13	2.6	3.53	6.24	3.9	4.97	2.01	3.25	1.32	4.92	2.55	1.78	3.23	1.86	4.83	4.57	6.62	5.75	5.28
ARHGAP19-SLIT1	1.76	0.1	0.86	4.47	2.3	14.27	0	2.56	25.81	5.39	8.49	1.41	1.73	2.65	0	0	1.13	0	0.63	0.76	7.7	0	0.9	1.82
ARHGAP20	0	0	1.28	0	0	0	0.66	0.41	8.26	0.09	0.62	0.45	1.66	1.02	0.82	0.83	0.71	0.13	0	0.72	0	0	0.26	0
ARHGAP21	23.42	34.5	70.64	27.24	33.98	29.79	38.79	16.13	97.15	36.08	47.81	39.24	80.4	35.01	58.26	46.9	42.24	23.12	24.41	40.83	67.59	55.03	59.92	50.16
ARHGAP23	0.21	0	2.67	0.32	3.27	0.03	5.07	0.28	1.22	1.28	1.48	0.43	0.51	1.32	0.39	0.91	0.64	0.36	0.11	1.34	1.2	0.97	0.19	0.45
ARHGAP24	17.3	9.42	2.04	11.22	11.23	7.14	5.54	3.8	19.35	7.46	5.45	11.17	18.39	18.41	8.63	9.87	4.95	11.19	19.62	12.94	29.97	10.27	7.85	12.07
ARHGAP25	11.59	7.04	2.01	22.45	18.82	0	1.2	0	0.36	1.73	0.85	0	1.51	0.74	0	0.38	0.48	0.89	0.91	1.71	0.83	1.64	0.6	0.68
ARHGAP26	7.63	24.66	7.15	12.42	14.66	9.98	5.83	1.5	3.13	1.4	3.3	2.27	1.6	2.84	0.55	1.79	1.46	3.33	4.27	2.8	10.13	3.63	4.45	4.76
ARHGAP26-AS1	0.74	3.35	4.4	3.11	6.39	1.65	0	0.32	0	0	0	0	0.46	0	0	0.38	0.33	0	0	0	0	0	0.72	0
ARHGAP27	14.98	11.78	3.03	14.73	13.4	8.06	2.04	0.98	1.03	3.33	4.38	7.08	10.03	4.38	3.47	4.76	2.21	3.09	2.37	5.64	3.08	6.19	3.55	4.02
ARHGAP28	6.06	4.52	7.81	4.85	4.8	4.86	2.05	0.41	8.81	0.78	4.12	0	0.48	0.16	1.34	0	0	0.06	0.96	0.27	0.59	0.26	0	0.8
ARHGAP29	2.82	5.59	7.01	3.28	1.45	3.97	4.83	5.26	16.23	7.74	12.21	6.62	5.5	5.3	4.16	4.98	5.48	3.06	6.41	5.48	15.04	5.37	4.33	8.16
ARHGAP30	15.08	27.87	8.73	25.43	34.96	1.13	0.4	1.76	0	5.22	0.38	7.57	1.82	3.11	4.43	3.25	0.94	3.69	2.5	1.49	3.4	2.41	5.58	3.73
ARHGAP31	3.62	0.46	2.64	0.36	8.28	0.68	0.1	2.19	4.21	2.81	4.47	1.09	9.17	1.53	0.41	0.66	1.3	0.32	1.09	7.66	1.09	0.35	0.67	0.6
ARHGAP32	16.78	25.54	30.02	19.41	40.48	47.9	25.34	28.13	45.4	32.11	33.46	21.73	26.19	29.63	21.45	14.21	23.65	12.92	19.84	16.61	32.78	22.84	27.95	32.84
ARHGAP33	4.7	23.96	9.31	10.44	14.5	18.83	10.91	15	3.91	14.28	4.27	14.96	7.13	15.3	2.44	2.26	3.39	13.12	9.48	3.44	9.89	4.39	1.86	3.89
ARHGAP35	21.9	38.04	31.42	36.86	52.38	49.13	54.87	56.44	67.23	78.22	98.43	49.01	69.55	60.09	72.57	39.54	38.87	23.43	37.28	40.49	72.41	83.37	79.43	111.56
ARHGAP36	0	0	0	0	0	0	0	0	0	0	0	0	0	0	0	0	0	0	0	0	0	0	0	0
ARHGAP39	6.34	4.31	1.35	3.06	3.87	3.56	3.35	3.08	2.72	7.32	6.41	5.26	3.75	11.14	1.6	0.99	2.22	2.81	5.22	1.85	2.51	0.76	0.87	2.18
ARHGAP4	6.85	15.18	8.88	17.36	24.12	5.33	0.94	2.47	3.45	3.33	3.58	2.23	0.15	1.96	0.22	0.51	0.59	0.7	0.63	0.12	0.77	1.19	0.11	0.69
ARHGAP40	0	0	0	0	0	0	0	0	0	0	0	0	0.15	0.31	0	0	0	0	0	0	0.57	0	0	0
ARHGAP42	0	0.36	1.02	0.05	3.27	0	0.19	0.96	9.13	0.29	9.66	0.53	2.08	1.22	1.18	0.43	0.75	2.7	3.38	2.05	4.93	7.67	2.56	6.13
ARHGAP44	4.4	2.95	9.63	7.49	0.79	18.69	14.13	16.09	8.68	12.45	16.1	11.62	16.69	22.97	28.43	11.9	13.41	14.81	16.8	23.8	27.89	61.63	42.09	46.17
ARHGAP5	18.68	20.25	24.93	14.6	12.68	23.04	39.92	42.35	49.85	47.55	56.38	72.32	94.69	52.33	53.6	53.54	50.13	23.33	33.29	52.43	83	58.85	65.02	86.39
ARHGAP5-AS1	1.12	2.27	8.92	2.35	3.32	3.49	6.88	2.43	7.44	6	6.52	7.04	4.5	10.58	4.67	3.46	9.22	5.23	5.64	2.71	6.5	15.37	8.19	7.06
ARHGAP6	0.21	0.19	3.05	0	0.15	0	1.97	1.01	1.69	0.06	1.08	0.64	0.25	0.49	1.87	1.12	1.07	0.36	0.3	0.1	0.45	0	0	0
ARHGAP8	0.99	7.48	7.67	3.16	0.57	1.77	6.01	2.13	12.14	4.61	13.97	1.62	1.64	1.53	2.02	0.5	0.97	0.23	0.41	2.02	0	0	0.94	0.65
ARHGAP9	34.63	46.41	3.98	34.65	59.83	11.23	0.46	0.13	0.71	1.88	4.5	10.99	1.27	5.3	4.34	1.2	8.28	3.85	4.03	2.06	1.15	0.65	0.47	4.69
ARHGDIA	16.91	53.88	37.42	74.43	160.96	177.9	40.67	23.2	28.96	46.1	70.33	194.45	61.05	279.04	88.15	57.58	53.17	85.4	83.87	29.57	74.99	42.04	67.59	66.32
ARHGDIB	555.24	299.7	124.68	975.26	954.55	52.41	7.26	29.54	8.29	7.56	7.57	1.49	7.31	2.23	4.15	2.74	3.95	0.55	0.5	2.23	2.75	0.81	2.31	1.24
ARHGDIG	0	0	0	0	0	0	0	0	0	0	0	0	0	0	0	0	0	0	0	0	0	0	0	0
ARHGEF1	17.08	53.05	46.73	32.57	46.23	9.45	20.56	6.64	4.62	10.44	9.72	22.29	11.77	40.24	8.69	4.36	7.81	23.11	57.72	6.26	59.75	17.87	16.39	14.47
ARHGEF10	4.07	3.92	14.8	4.53	3.35	2.45	1.84	1.3	14.89	2.32	14.27	4.15	10.25	1.73	5.11	7.23	2.83	1.68	3.04	5.82	3.04	3.02	4.8	7.58
ARHGEF10L	15.66	23.27	33.93	17.51	21.84	29.5	28.04	29.27	28.55	35.68	32.12	47.21	67.54	38.67	31.47	31.37	35.32	32.04	63.08	48.8	30.32	25.09	47.43	43.66
ARHGEF11	18.53	40.48	11.74	23.14	18.26	55.13	33.22	20.4	35.18	29.58	39.63	35.14	39.13	43.04	38.2	21.15	20.23	18.76	27.3	15.67	45	30.56	19.19	28.62
ARHGEF12	27.5	22.21	24.34	25.2	33.15	43.36	62.77	55.44	73.77	69.7	99.55	91.67	157.46	90.36	136.76	85.41	96.01	25.14	42.88	53.39	101.28	83.29	74.18	106.82
ARHGEF15	0.9	2.87	2.59	1.85	1.87	1.11	0	0.28	3.09	0	0	2.06	0.11	2.21	0.89	0.19	0.39	1.08	0.47	0.1	0.65	0.38	0.52	1.79
ARHGEF16	0	9.6	8.61	1.64	0	0.35	3.94	4.47	0.57	3.19	0.91	13.41	4.74	11.85	7.87	3.5	5.76	9.71	7.81	3.15	7.49	6.41	6.2	6.08
ARHGEF17	3.23	7.26	7.97	4.5	11.48	3.82	6.7	11.94	27.12	10.98	14.91	9.84	7.29	15.51	7.79	6.09	4.81	6.16	7.9	4.44	10.81	8.58	5.9	5.97
ARHGEF18	9.79	5.94	19.17	12.36	20.89	14.41	10.64	10.64	14.82	14.33	18.05	8.96	17.33	15.35	9.45	9.99	8.86	7.59	9.86	14.32	15.81	17.77	13.68	41.36
ARHGEF19	5.99	3.77	6.75	3.4	4.46	8.88	3.33	0.8	6.62	1.6	1.88	0.59	1.57	1.47	3.35	0.6	0.31	0.33	0.2	0.25	0	0.16	0	0.16
ARHGEF2	29.11	35.83	20.18	22.21	34.33	21.22	18.65	5.82	27.17	14.05	13.66	8.2	8.64	8.09	14.52	3.76	6.1	3.81	5.62	6.8	9.89	12.05	10.88	25.82
ARHGEF25	0	0.16	5.33	3.13	2.05	0.27	0	0.3	1.53	0.96	0	1.73	0.86	1.74	0.61	0	2.76	0.97	1.16	2.23	6.43	0	0	4.36
ARHGEF26	4.64	4.9	8.42	7.9	7.44	4.48	11.88	22.22	6.97	13.95	14.91	5.86	7.98	7.8	6.34	3.25	6.54	4.75	6.47	10.43	14.04	14.55	7.49	18.65
ARHGEF26-AS1	46.75	44.62	63.38	48.4	62.33	44.37	0.5	1.05	1.39	3.25	1.57	3.76	3.68	7.38	5.58	0.56	0.84	2.62	3.65	0.73	2.82	0.93	1.19	1.83
ARHGEF28	10.26	8.37	9.71	7.16	11.67	9.36	20.78	19.94	17.39	26.2	24.61	41.1	64.22	30.44	38.24	29.32	32.65	12.19	15.27	15.34	25.41	11.9	10.14	12.62
ARHGEF3	19.73	31.11	32.29	14.61	12.72	45.03	22.5	28.55	23.47	28.7	27.11	10.46	20.79	18.04	18.49	8.18	23.18	19.23	38.32	24.59	83.45	43.84	41.22	61.21
ARHGEF33	0.98	0.19	0.5	0.11	0	1.64	1.24	0.56	10.58	2.35	3.47	0.82	0.5	2.06	0.07	0	0.29	0.08	0.41	0.26	1.88	0.11	0.16	0.45
ARHGEF34P	0.27	8.31	7.41	7.8	6.72	18.77	5.38	10.33	4.84	15.53	10.99	40.66	13.68	20.15	26.08	8.65	16.55	20.03	21.49	3.01	27.93	27.84	22.39	34.12
ARHGEF35	19.45	2.69	1.11	1.31	8.67	4.99	5.14	8.58	0.27	23.95	18.75	11.9	22.07	25.39	5.89	23.58	19.76	5.79	11.93	19.5	138.04	29.09	38.08	46.24
ARHGEF37	0.03	3.34	0.72	0.1	0	0.29	3.15	3.72	1.89	7.4	3.15	3.26	8.75	7.11	5.71	6.56	3.5	2.9	8	6.77	13.11	8.84	4.05	7.52
ARHGEF38	0.1	0	2.25	0.22	0.11	0	7.93	8.04	15.03	8.24	7.2	0.42	0.31	0.49	0	0.5	1.07	0.47	0	0.07	1.16	0	0	0
ARHGEF39	3.04	8.48	11.65	4.49	4.92	6.25	4.42	1.06	2.45	2.38	1.3	3.42	6.43	4.36	5.08	4.47	1.57	1.16	1.44	2.61	3.08	2.64	1.87	4.87
ARHGEF4	8.98	11.56	27.66	8.05	8.09	16.77	5.89	3.68	18.67	8.28	2.32	5.87	6.82	10.66	5.69	9.93	5.43	7.04	5.2	4.31	8.17	5.22	3.75	6.52
ARHGEF40	3.6	14.62	14.04	4.58	23.52	19.27	11.53	9.57	22.53	12.27	18.36	17.83	13.41	27.35	6.53	6.38	7.02	7.23	9.46	8.03	13.52	7.77	6.18	6.57
ARHGEF5	16.36	8.7	5.92	7.34	9.84	20.11	53.3	23.66	22.31	39.87	31.8	39.09	37.24	19.85	25.55	27.54	27.41	24.93	27.85	15.4	32.65	33.16	39.22	51.62
ARHGEF6	49.02	15.13	4.62	34.28	29.43	3.77	0.3	3.65	8.31	2.54	0.99	0.96	2.45	1.01	0.19	1.31	1.45	0.4	0.36	0.23	0.49	1.26	0.14	0.4
ARHGEF7	27.04	19.01	40.75	23.3	12.01	27.69	32.19	38.12	64.73	51.82	59.67	42.45	116.38	27.71	52.56	57.37	33.6	24.65	41.77	67.92	47.82	57.89	52.62	44.82
ARHGEF9	41.07	35.55	35.04	27.55	25	64.05	49.14	40.41	47.36	52.13	45.69	27.61	50.22	40.79	41.57	29.95	48.85	27.46	33.68	81.21	82.93	59.52	58.19	88.18
ARID1A	99.84	118.18	101.83	128.79	200.71	173.34	94.48	66.5	75.07	103.07	121.99	114.68	89.1	134.37	77.27	61.28	81.09	49.03	58.7	54.98	125.43	61.95	70.42	98.42
ARID1B	23.01	24.19	33.09	19.34	31.99	32.08	29.67	33.32	36.96	57.89	53.15	48.53	42.44	46.52	28.25	22.88	23.89	26.75	33.97	24.59	50.99	25.8	32.08	36.51
ARID2	25.89	34.85	35.91	42.28	49.98	19.18	23.9	27.16	36.56	47.04	64.63	57.46	40.83	60.43	23.48	27.7	28.91	21.09	46.74	22.41	82.11	26.77	26.9	31.67
ARID3A	37.3	27.07	23.11	34.79	48.12	52.65	11.24	11.84	10.82	12.92	25.21	16.42	6.48	13.32	3.4	5.28	4.22	9.4	14.77	3.09	17.67	7.02	9.26	14.51
ARID3B	19.33	38.44	44.74	41.65	49.58	46.03	25.03	20.12	22.61	17.35	36.51	20.86	39.96	8.76	14.43	8.4	11.25	25.5	9.89	49.58	12.98	22.83	15.58	18.81
ARID3C	0	0	0	0	0	0	0	0	0	0	0	0	0	0.73	0.25	0	0	0	0	0	0	0	0	0
ARID4A	19.86	21.1	21.2	18.97	18.29	23.97	32.21	16.6	22.2	37.25	35.73	22.18	21.26	15.53	16.4	10.81	11.89	7.33	17.28	16.63	48.49	14.09	11.48	18.37
ARID4B	32.58	41.85	54.46	67.12	57.31	47.7	35.45	22.3	55.75	51.29	78.93	38.66	111.64	31.84	48.4	44.32	43.14	23.74	22.86	60.22	68	52.82	39.01	47.11
ARID5A	4.99	2.22	4.57	5.92	7.04	4.44	4.5	0.3	7.29	1.06	5.16	25.6	14.15	4.37	17.84	19.89	1.52	5.14	1.73	1.47	5.19	2.58	7	2.15
ARID5B	29.5	25.03	18.74	17.01	14.19	42.92	16.74	22.52	19.44	20.88	22.6	51.42	129.44	32.22	39.49	35.85	16.7	40.89	49.68	79.42	81.26	46.03	36.59	33.37
ARIH1	57.21	39.75	80.09	41.92	36.45	62.27	103.54	72.19	95.4	125.67	128.21	70.54	113.37	44.23	37.66	31.07	28.53	28.32	32.43	62.12	74.21	35.9	42.96	40.37
ARIH2	17.71	18.19	13.96	15.06	20.05	19.47	20.54	42.47	33.61	52.91	40.85	20.93	68.12	33.35	40.21	26.99	36.61	15.27	18.67	38.32	38.48	39.02	29.18	56.69
ARIH2OS	6.4	7.53	13.4	10.62	9.63	7.28	0.55	2.32	2.98	2.5	2.59	0.37	4.38	2.35	5.68	3.65	3.57	2.39	3.37	3.31	1.03	4.62	3.05	5.3
ARL1	18.82	19.94	26.41	16.66	22.57	26.14	87.15	63.33	56.52	69.2	79.18	66.78	40.56	58.22	73.73	67.88	66.18	36.36	30.79	57.48	95.63	83.37	83.83	67.05
ARL10	11.12	11.72	11.8	10.34	10.77	5.89	8.78	5.21	13.76	5.88	7.13	8.99	3.8	13.45	7.52	6.41	3.72	4.64	7.79	3.15	14.1	5.94	5.65	7.58
ARL11	3.49	4.63	5.24	4.99	5.08	2.05	0.06	0	0	0.26	0	0.16	0.34	0.24	0	0	0.08	0.18	0.16	0.2	0.65	0.13	0.6	0
ARL13A	0	0	0	0	0	0	0	0	5.12	2.56	0	0.39	0.57	0	0.41	0	0	0.22	0	0	0.54	0	0	0.45
ARL13B	5.6	5.63	3.99	3.05	4.51	7.24	16.07	7.82	13.86	12.02	23.75	2.92	6.71	4.61	4.74	2.76	3.83	1.63	4.39	7.88	8.4	6.4	3.74	10.97
ARL14	0	0	0	0.12	0	0	0.17	0.12	0	0.77	0.65	0.47	2.07	0	2.69	0.29	0.5	0	0.47	1.2	1.29	0	1.09	0
ARL14EP	4.49	5.91	16.15	12.88	0.33	4.03	24.81	13.99	8.85	19.1	10.25	7.41	12.88	7.1	19.51	12.59	15.15	6.2	6.07	11	26.05	25.29	30.31	37.32
ARL14EPL	0	0	0	0	0	0	0	0	0	0	0	0	0	0	0.51	0	0	0	0	0.63	0	0.8	0	4.08
ARL15	5.76	9.63	8.72	6.04	10.13	3.62	15.25	9.13	19.54	18.35	27.59	33.14	17.48	15.8	17.62	20.55	23.89	6.92	12.9	12.94	23.05	19.99	20.44	21
ARL16	54.19	27.69	28.64	21.71	37.34	53.16	41.34	25.24	3.96	31.75	19.43	8.98	23.58	14.25	25.61	15.34	24.14	11.41	8.5	46.19	13.15	18.81	27.6	37.55
ARL17	0	0	0.42	0.73	12.09	0	1.26	0	0	0.71	2.46	0	3.78	0	0	0	5.47	0	0	1.1	0	0	0	1.42
ARL17A	25.32	55.83	45.76	42.21	56.15	33.32	26.72	22.09	42.88	79.34	102.18	52.26	42.99	63.86	42.1	23.5	54.46	27.24	62.8	27.06	75.29	35.78	24.16	93.37
ARL2	73.09	73.55	78.83	65.49	83.42	66.55	55.53	77.31	38.95	96.67	62.08	94.56	110.01	64.58	176.94	75.76	78.71	44.74	20.68	44	51.56	124.22	117.82	150.86
ARL2-SNX15	9.38	6.6	17.27	12.64	43.91	6.71	21.37	28.84	48.36	20.73	30.72	14.99	24.56	30.96	19.5	10.93	27.25	4.39	12.49	13.58	12.31	26.93	16.03	25.8
ARL2BP	48.39	21.33	51.69	25.77	13.21	21.98	57.43	55.39	37.33	56.87	46.47	24.35	29.92	28.57	41.4	29.27	36.62	17.37	13.63	30.03	30.18	37.83	31.09	42.15
ARL3	7.35	21.6	28.62	9.04	7.25	25.63	46.76	55.59	46.81	46.73	57.26	17.8	39.42	15.59	48.85	36.87	40.82	6.71	5.64	24.91	15.26	34.86	32.55	31.81
ARL4A	13.23	6.15	14.9	5.17	10.94	41.11	31.79	26.27	19.29	29.08	29.98	19.52	8.42	26.18	5.22	2.66	4.96	3.82	14.49	25.19	18.88	11.93	5.99	10.28
ARL4C	6.91	2.89	15.19	7.48	6.2	8.75	24.25	22.14	27.1	16.38	38.97	13.82	5.25	6.43	6.28	4.81	4.61	8.26	10	11.27	28.12	24.33	33.11	23.68
ARL4D	14.8	18.94	12.51	2.59	1.82	9.63	34.84	25.14	65.65	28.08	17.23	13.95	5.36	17.59	14.38	3.24	3.28	9.26	16.25	2.17	27.11	17.56	8.11	8.49
ARL5A	9.36	5.81	10.32	9.06	5.75	11.14	10.18	10.07	12.74	14.96	16.49	16.25	19.2	13.77	13.95	12.88	18.92	4.05	8.55	15.81	17.6	19.83	15.05	21.8
ARL5B	32.45	23.38	27	24.13	15.4	25.85	42.67	28.75	34.87	49.29	67.97	28.11	27.67	15.11	23.15	44.76	11.5	7.16	14.16	25.03	20.78	25.51	50.01	15.14
ARL5C	0	0	0	0	0	0	0	0	0	0	0	0	0	0	0	0	0	0	0	0	0	0	0	0
ARL6	9.53	12.08	11.38	8.66	8.21	11.04	6.52	6.07	33.49	11.02	9.77	2.78	2.47	9.07	3.81	1.77	4.98	3.4	8.16	11.67	18.95	9.97	13.89	14.26
ARL6IP1	80.55	96.05	130.8	64.95	73.1	107.34	185.47	217.1	252.19	161.64	240.38	74.45	110.62	70.27	108.41	89.49	101.57	39.36	37.82	95.46	122.09	141.81	142.81	126.88
ARL6IP4	55.9	57	62.66	62.09	71.12	90.53	39.6	54.81	23.87	65.19	67.11	48.08	85.17	66.18	101.06	54.61	67.39	36.5	26.21	68.47	47.06	119.63	87.83	98.29
ARL6IP5	70.64	35.81	47.52	25.28	20.31	44.49	72.35	65.5	82.68	58.27	68.18	37.69	49.61	43.72	49.61	29.73	56.18	34.44	39.72	57.1	99.69	70.99	76.4	86.64
ARL6IP6	7.1	1.79	4.42	10.5	4.33	6.34	4.6	14.82	18.88	10.49	8.7	1.48	6.83	2.21	6.57	6.51	11.23	0.23	2.04	4.03	4.12	4.62	4.62	6.36
ARL8B	18.37	14.5	12.81	27.45	21.43	12.96	31.69	20.19	10.52	24.7	23.97	46.14	40.48	36.4	48.82	34.6	40.38	18.77	28.53	36.5	64.83	72.16	63.84	82.72
ARL9	0	0	4.14	2.89	0.24	0	0	0	0	0.91	4.1	0.73	3.8	0	0	0	3.91	0.81	0	2.84	1.02	0	3.42	3.07
ARMC1	5.87	5.03	17	5.58	3.81	4.41	11.21	12.68	9.75	18.11	13.36	9.91	8.4	12.88	11.42	10.02	11.67	5.33	10.81	11.52	23.51	21.43	18.44	27.1
ARMC10	7.59	17.84	16.32	8.65	14.03	9.82	8.17	4.56	6.33	13.23	11.77	5.93	5.46	9.19	12.24	11.2	9.69	4.21	7.36	8.97	9.71	18.63	13.87	19.66
ARMC12	0	17.01	10.67	0.68	0	0.14	3.22	0	0	1.49	0	2.06	0.76	0.77	0.6	0.63	3.57	1.59	1.14	0	0.79	0.94	1.5	0.86
ARMC2	2.88	18.05	4.07	4.52	1.48	2.48	1.54	4.9	0.15	7.14	6.98	5.9	4.44	8.4	2.7	2.99	4.04	4.63	7.62	6.17	15.72	4.64	3.6	3.59
ARMC3	0	2.21	0.8	0.3	3.71	0.13	0	0.25	0.18	0	1.68	0	0	0.37	0	0	0	0.42	0.77	0.78	1.17	1	0.14	0
ARMC4	3.53	0.62	1.65	0.25	0.2	0.49	0.54	1	0	1.2	3.4	0	0.12	0.5	0.5	2.16	0	0	0	0.17	0	0	0.13	0
ARMC5	3.95	8.88	5.24	10.41	15.11	13.87	9.96	7.65	17.69	10.45	8.63	7.32	7.74	10.53	7.98	2.96	12.43	4.76	5.92	10.02	3.74	10.21	10.02	11.56
ARMC6	13.51	8.78	3.36	11.39	3.91	3.37	2.11	6.89	11.08	8.73	3.04	9.65	3.04	15.78	7.02	3.57	5.92	7.54	2.7	5.29	7.6	6.81	6.39	6.42
ARMC7	0.51	0.17	2.79	2.54	9.18	0.23	0.45	1.82	1.08	1.39	2.47	6.05	3.39	11.72	2.4	0.68	2.47	2.03	4.91	1.57	5.01	1.59	1.88	3.07
ARMCX1	14.25	15.03	15.49	6.25	7.54	21.49	47.55	59.95	27.01	49.41	37.28	24.21	38.26	21.86	48.5	31.58	33.84	10.32	8.83	31.69	31.06	43.37	34.23	47.73
ARMCX2	15.76	10.7	14.37	7.25	5.82	30.03	54.26	37.59	54.49	47.42	36.75	18.11	16.59	24.92	10.78	12.24	21.72	12.58	16.66	16.32	26.95	26.31	26.2	31.43
ARMCX3	24.88	51.01	27.46	20.17	13.96	29.31	84.08	73.06	190.8	62.52	122.02	26.87	64.65	33.53	65.44	37.56	42.13	16.54	22.49	87.41	69.17	129.11	80.91	120.94
ARMCX5	5.84	13.26	3.54	6.95	13.63	4.03	10.28	8	3.7	12.73	13.54	24.94	12.56	12	28.62	8.66	16.62	10.79	9.64	11.81	26.58	15.99	14.49	22.76
ARMCX5-GPRASP2	8.1	14.16	2.92	2.43	0	13.48	1.31	2.43	13.08	8.65	17.91	10.06	21.9	14.82	9.97	16.43	14.09	9.14	0	10.78	12.46	4.79	6.21	35.19
ARMCX6	47.81	76.39	43.5	16.26	44.28	46.85	87.56	83.96	128.55	97.25	89.48	31.64	54.42	35.03	86.01	37.36	62.25	14.05	18.94	47.29	42.51	51.03	48.69	70.31
ARMS2	0	0	0	0	0	0	0	0	0	0.63	0	0	0.56	1.14	0	0	0.81	0	0.76	0.49	0	0	0	1.27
ARNT	29.56	48.28	29.41	16.46	23.56	17.73	25.98	22.15	65.71	29.06	33.84	26.99	43.82	31.38	34.94	17.67	22.8	13.42	29.48	25.36	65.21	43.47	24.3	53.82
ARNT2	24.65	30.35	39.51	42.7	41.32	36.15	13.12	26.91	14.58	27.74	28.94	41.76	49.93	42.61	23.83	19.01	30.66	13.2	12.38	27.41	28.84	13.42	17.49	16.43
ARNTL	5.23	6.12	1.49	2.87	2.59	4.14	16.13	12.6	9.27	5.06	3.19	22.02	34.31	14.77	10.62	17.3	10.12	18.73	10.31	27.86	29.31	15.17	17.5	18.12
ARNTL2	1.36	1.6	1.83	1.54	1.85	1.64	2.23	4.28	9.87	6.63	9.13	1.99	7.1	3.2	5.44	6.05	3.25	0.22	0.16	0.47	0.11	0.4	0.09	0.2
aromatase	0	0	0	0	0	0	0	0	0	0	0	0	0	0	0	0	0	0	0	0	0	0	0	0
ARPC1A	17.59	12.58	35.22	17.85	20.46	11.18	35.3	43.99	54.45	35.79	35.52	46.11	54.46	71.29	101.54	52.9	82.91	28.63	29.06	38.83	57.04	73.81	88.11	112.84
ARPC1B	21.59	17.81	5.35	42.67	50.29	6.04	20.61	22.73	4.8	13.67	9.29	39.47	22.15	33.74	43.75	30.45	45.64	17.22	12.53	7.77	10.81	17.68	20.89	24.44
ARPC2	99.36	104.32	200.42	254.51	364.49	90.92	229.31	153.93	152.53	205.89	227.32	104.81	288.16	96.46	367.08	222.73	379.81	45	31.83	136.57	100.68	313.87	273.39	404.54
ARPC3	60.6	72.48	42	78	62.97	64.5	146.99	240.24	183.03	267.75	199.81	119.22	128.85	109.61	272.92	232.7	297.8	52.99	44.86	92.62	122.01	184.36	275.49	202.55
ARPC4	51.65	81.29	78.59	93.41	96.27	52.4	65.68	83.09	84.65	75.98	92.17	52.3	92.98	58.76	130.47	75.01	97.33	33.95	20.48	51.55	45.92	100.7	98.91	108.25
ARPC4-TTLL3	1.07	0.71	0	0.49	0.18	0	2.89	4.51	0.61	4.65	5.34	3.69	8.71	4.82	3.08	1.23	2.84	2.42	1.49	0.97	0.67	0	1.09	0
ARPC5L	11.38	21.93	18.51	18.86	43.7	19.17	48.24	46.21	30.32	47.48	53.51	7.09	103.98	23.35	55.47	41.49	52.3	5.93	5.92	38.46	24.48	66.76	38.6	67.67
ARPP19	103.36	68.48	114.8	62.15	58.86	109.96	182.66	185.86	139.68	154.36	190.25	134.79	248.44	120.98	172.06	174.06	193.62	56.53	106.77	254.03	162.02	203.87	236.74	236.14
ARPP21	0	0	0.47	0	0	0	0	0	3.67	0	0.79	0	0	1.12	0	0	0	0	0	0	0	0	0	0
ARR3	0	0.27	0.81	0.13	0	4.29	0	0	0	0	0	0	0	0.71	0.25	0.29	0	0	0	0	0	0.39	0	0
ARRB1	6.4	2.48	4.01	6.53	6.08	5.96	15.22	8	10.58	12.23	12.32	12.44	12.35	9.78	18.65	10.7	7.41	0.13	0.78	0.65	0.97	0.32	0.27	0
ARRB2	39.99	68.98	9.1	71.03	70.5	25.67	10.92	12.46	13.07	18.66	12.29	10.24	8.17	14.72	15.74	1.75	11.76	16	8.53	10.57	16.05	18.67	12.91	31.76
ARRDC1	18.81	25.63	19.05	29.34	43.6	18.56	20.38	16.87	8.24	22.09	19.68	25.8	8.19	39.53	7.82	8.42	7.21	19.15	19.72	7.02	21.23	7.49	9.73	10.52
ARRDC2	0	1.35	0.07	2.62	1.14	0	8.26	8.34	5.99	1.55	1.96	23.63	17.02	16.4	13.93	7.96	10.11	16.6	7.12	9.07	15.97	19.47	17	16.92
ARRDC3	14.38	34.51	22.41	20.71	16.41	14.62	25.44	42.38	51.03	65.65	43.73	57.9	29.72	43.53	39.85	18.4	34.55	21.66	24.68	17.85	122.49	110.5	67.03	64.69
ARRDC3-AS1	12.32	22.3	27.3	24.86	34.53	19.52	2.58	0.67	3.1	1.36	0.33	5.68	2.78	3.28	4.07	2.61	2	1.85	2.85	1.81	4.89	3.86	3.7	2.56
ARRDC4	15.23	12.56	12.41	8.84	7.91	23.97	34.77	28.37	18.7	45.45	30.22	59.19	92.69	52.89	28.32	29.82	48.77	10.65	8.59	19.89	16.22	12.62	11.13	15.43
ARRDC5	0.26	2.11	0	6.35	19.13	0	0	0	0	0	0	2.55	0	0.55	0	0.67	0	0.61	0	0.47	0.5	0	0	0.16
ARSA	13.66	8.5	23.8	13.63	7.43	14.39	6.07	10.3	7.18	13.06	6.58	26.2	9.74	22.14	9.73	7	7.04	18.63	8.1	3.37	5.9	4.93	4.95	5.89
ARSB	8.9	7.4	17.39	16.36	30.1	13.88	2.14	10.47	11.24	7.67	8.88	9.63	13.99	10.52	10.37	5.59	9.49	4.61	4.27	5.48	6.28	6.06	5.17	8.48
ARSD	7.97	7.3	8.22	14.71	18.01	14.69	7.56	15.11	11.5	24.64	22.42	15.98	13.34	19.94	23.78	13.75	14.36	7.54	4.66	7.65	17.41	7.61	17.34	20.22
ARSE	2.99	4.84	2.35	1.31	0.4	0.58	2.34	4.2	0.27	5.48	8.85	18.19	9.42	5.64	24.94	0	12.75	9.55	1.61	7.78	2.34	11.55	0	3.09
ARSF	0.28	0.29	0.14	0.17	0.02	0.04	0	0	0	0	0	0	0	0.44	0	0	0	0.16	0.29	0	0	0	0	0
ARSG	7.82	1.46	2.3	1.07	1.24	0	0.75	4.12	0	3.58	1.42	8.75	11.03	5.47	13.74	9.14	9.85	4.22	3.64	2.04	12.09	2.86	5.67	5.87
ARSH	0	0	0	0	0	0	0	0	0	0	0	0.35	0	0	0	0	0	0.2	0	0	0	0	0	0
ARSI	0.13	0.05	0	0	0	0	0	1.39	4.38	0	0	0.19	0	0	0	0	0.2	0	0	0.12	0.26	0	0.32	0
ARSJ	0.98	0.51	3.11	1.23	0.65	0	3.29	17.45	0.68	3.11	0.86	5.34	10.29	5.76	11.93	5.28	3.08	0.87	0	1.82	0.36	0.21	1.48	1.07
ARSK	18.11	19.55	35.74	19.71	22.14	18.06	5.39	11.99	1.39	9.7	4.37	6.54	8.86	6.46	11.86	4.68	10.26	3.35	5.13	5.16	8.24	4.76	6.89	9.36
ART1	0	0	0	0	0	6.58	0	0	0	0.19	0	0	0.68	0	0	1.13	0.29	0.77	0	0	0	0	0	0
ART3	8.41	8.84	16.77	8.87	10.67	7.72	3.9	0.28	0.56	10.37	0	1.06	3.17	0	0	0	0.57	0	0	1.37	1.49	0	0	0
[truncated: 21,119 more rows]
