# Supplementary material for: Novel Observations From Next-Generation RNA Sequencing of Highly Purified Human Adult and Fetal Islet Cell Subsets
Source: Oxford University Press journal article supplement (doi:10.2337/db15-0039), 2015-04-30
Supplement: db150039supplementarydata3.xlsx [file db150039supplementarydata3.xlsx]

## Sheet: supplemental.table3.heatmap.clu
Supplemental Table 2: Genes located within each cluster. The table provides the identity of the genes that comprise each of the 9 clusters. The 6,524 genes shown had an average TPM >25 in at least one cell type (adult α or β, fetal α or β). The genes were clustered using a K-means algorithm with K set to 9.
Adult a	Adult Endocrine	a	b	Fetal	Fetal a	Fetal b	Nonspecific Cluster 1	Nonspecific Cluster 2
ABCC9	AACS	A1CF	AAAS	AADAT	AASDHPPT	A4GALT	AAED1	AAK1
ABCF1	AARS	AB074188	ABCA3	ABAT	ABCC5	AB062081	ABHD13	AAMDC
ABCF3	AATF	ABHD14A	ABCB6	ABCA2	ABCE1	AB062083	ABLIM2	AAMP
ACOT13	ABCA5	ABHD15	ABCC8	ABHD16A	ABI2	ABCA13	ACACA	ABHD14B
ACTR1A	ABCB1	AF070581	ABHD4	ABHD17B	ACAD8	ABCA8	ACAD11	ACP1
ADAM9	ABCD3	AFP	ABR	ABI1	ACAP2	ABCG1	ACAT1	ADNP2
ADD1	ABHD12	AK022915	ABRACL	ABL1	ACOX1	ACAT2	ACBD3	ADSL
AF289551	ABHD2	AK123675	ACP6	ACADM	ACTL6A	ACTN1	ACBD5	AGO2
AF401214	ABHD3	AK125051	ACSL1	ACIN1	ACTR2	ADAMTSL3	ACBD6	AK094413
AF420437	ABLIM1	AKAP12	ACTN4	ACP2	ADI1	ADRA2A	ACLY	AK096718
AFF4	ACAA2	AL109792	ACVR1B	ACTB	ADNP	AF088041	ACSL3	AK2
AK057321	ACO1	AL831977	ADAM17	ACTG1	AFTPH	AFMID	ACTR10	AKR1A1
AK092380	ACO2	ALDH1B1	ADAMTS2	ACVR1C	AGTPBP1	AGPAT2	ACYP1	AKR7A2
AK097119	ACTR1B	ALYREF	ADCYAP1	ADD3	AHCTF1	AK024248	ACYP2	AL832909
AK097143	ACVR1	AMBP	ADPGK	AF131837	AHCY	AK057681	ADAM10	ALDH1A1
AK127443	ADAR	ANK2	AES	AF339817	AHCYL2	AK090736	ADH5	ALDH2
AK303607	ADCK3	ANXA4	AFF1	AGO1	AHSP	AK092965	ADRBK2	ALG8
AK311113	ADCY1	AP1G1	AGPAT6	AGO3	AK022787	AK095057	AF055024	ALKBH7
AKAP13	ADK	AP2S1	AIP	AGPAT1	AK025288	AK097472	AGAP3	AMFR
AKAP8	ADM	APBB1	AK092048	AIF1	AK055601	AK123543	AHCYL1	ANAPC11
AL832937	ADPRHL2	APLP1	AK125301	AK095583	AK093534	AK123584	AHI1	ANKLE2
ANAPC13	ADRM1	APOA1	AK311213	AK303572	AK098095	AK123889	AHSA2	ANXA7
ANKRD11	AEN	APOC1	AKAP17A	AKIRIN2	AK098769	AK123891	AIDA	AP1M2
ANKRD28	AFG3L1P	APOC3	AKAP8L	AKT2	AK9	AK125288	AK000154	APEH
ANKS1A	AFG3L2	APOH	AKIP1	AL355711	AKAP11	AK125412	AK054990	APH1B
ANP32B	AGAP6	ARF5	AKR1C1	AL831889	AKAP9	AK125489	AK055197	APRT
ANXA6	AGAP9	ARGLU1	ALG2	AMACR	ALDH3A2	AK125727	AK056623	AQR
AP1B1	AGFG1	ARHGEF28	AMZ2	AMD1	ALMS1	AK125769	AK094156	ARHGEF12
AP2A2	AGT	ARL5B	ANAPC16	AMPD2	ANKRD13A	AK127190	AK095179	ARHGEF5
AREL1	AHSA1	ARRDC4	ANKRD40	ANGEL1	ANKRD17	AK128559	AK3	ARL1
ARFGEF1	AIFM1	ARX	ANKRD65	ANK3	ANKRD37	AK293147	AK307870	ARL2-SNX15
ARHGAP21	AIG1	ASS1	ANP32E	ANKRD36	ANKRD54	AK298300	AKIRIN1	ARPC3
ARHGDIA	AIMP1	ASXL3	APMAP	ANKRD36B	ANKS1B	AK301666	AKR1B1	ARV1
ARHGEF11	AJ420422	ATF6	ARHGEF3	ANKRD52	ANP32A	AK302511	AKT3	ATG4D
ARID2	AK022030	ATP2B1	ARL6IP4	AP3M1	AP2B1	AK308965	ALB	ATIC
ARID4B	AK025140	ATP2B4	ASAP1	APOA2	AP2M1	AK310751	ALCAM	ATOX1
ARL17A	AK055323	ATXN7L1	ASB8	ARF1	APOOL	AKT1	ALDH9A1	ATP5A1
ARPC1B	AK057657	AURKAIP1	ASRGL1	ARF6	APPBP2	AL050141	ALG13	ATP5B
ARPC4	AK092331	BAD	ATP2A3	ARID4A	ARF4	AL137655	ALG5	ATP5C1
ASNA1	AK094621	BAMBI	ATRNL1	ARL4A	ARHGAP32	AL389983	ANAPC5	ATP5D
ASXL2	AK097694	BCAR1	BACE2	ATAT1	ARID1B	AL832439	ANAPC7	ATP5E
ATP9B	AK123292	BCL2L2-PABPN1	BC065231	ATF7IP	ARIH1	ALAS1	ANKFY1	ATP5F1
ATXN1	AK125598	BIRC6	BC073801	ATG9A	ARL2BP	ALOX5AP	ANKIB1	ATP5G1
ATXN7	AK126318	BSCL2	BFAR	ATP11A	ARL4C	AMT	ANKRD10	ATP5G2
AX746869	AK127087	BSG	BHLHE40	ATP5J2	ARL4D	ANAPC15	ANXA5	ATP5G3
AX747393	AK310472	BTAF1	BHLHE41	ATP8A1	ARL6IP1	ANKHD1-EIF4EBP3	AP5M1	ATP5H
B4GALNT3	AKAP2	BTBD11	BLOC1S5-TXNDC5	AX747164	ARMCX2	ANXA1	APC	ATP5I
BAHD1	AKTIP	BTG1	BMP5	B4GALT1	ARMCX6	ANXA3	APOO	ATP5J
BC042616	AL122050	C11orf31	C14orf132	BACE1	ARNT	APEX1	APPL1	ATP5L
BC042955	AL137535	C14orf1	C1orf127	BAIAP2	ASB3	ARG1	APPL2	ATP6AP1
BC107108	AL832212	C19orf77	C22orf42	BASP1	ASCC3	ARHGAP17	ARCN1	ATP6AP2
BCR	ALDH18A1	C1orf198	C6orf70	BAZ2A	ASH1L	ARHGAP9	ARFGAP1	ATP6V0B
BICD1	ALDOA	C1orf210	CABP7	BAZ2B	ATF1	ARHGDIB	ARFGAP2	ATP6V0E1
BTBD6	ALDOC	C5orf38	CACNA1H	BBS1	ATF7	ARHGEF1	ARG2	ATP6V0E2
C10orf76	ALG3	C7orf43	CACNA2D1	BBS9	ATG3	ARHGEF2	ARHGAP35	ATP6V1D
C12orf50	ALKBH3	CACNA1A	CADM1	BC014138	ATM	ARHGEF26-AS1	ARHGEF7	ATP6V1F
C2CD3	ALKBH5	CACNB2	CALD1	BC082979	ATP10D	ARID1A	ARHGEF9	ATP6V1G1
C6orf62	ALPK3	CALY	CAMKK1	BCKDHB	ATP13A1	ARID3A	ARL3	ATP9A
C9orf3	ALS2	CAMTA1	CAMLG	BCOR	ATP1B3	ARID3B	ARL6IP5	ATPIF1
CACFD1	AMPD3	CAPZA1	CAMTA2	BGN	ATP5O	ARL16	ARMCX1	ATRAID
CALM3	AMY2A	CBFA2T2	CANX	BRAF	ATP6V1A	ARNT2	ARMCX3	ATXN10
CAMK2G	ANAPC1	CBX6	CAPN13	BRD2	ATP6V1B2	ARRB2	ARPP19	B4GALT3
CAPN1	ANG	CCDC86	CAPRIN2	BRE-AS1	ATPAF1	ARRDC1	ARRDC3	B9D1
CAPZB	ANGEL2	CCNL1	CASR	BRK1	ATXN3	ASB9	ASNSD1	BABAM1
CBLL1	ANKH	CDC42EP4	CCDC167	BRPF3	ATXN7L3B	ASTN2	ASXL1	BAG1
CCDC92	ANKHD1	CDH1	CCDC181	BSN	AUH	ATF6B	ATF3	BANF1
CCDC97	ANKRD12	CDK10	CCDC90B	BTBD19	AZI2	ATG16L2	ATF4	BC009467
CCNK	ANKRD18A	CDO1	CCNI	BTBD7	AZIN1	ATN1	ATG2B	BC033281
CD82	ANKRD36BP1	CEP85L	CCPG1	BTG2	BACH1	ATP11B	ATMIN	BC070363
CDK11B	ANKRD39	CERCAM	CDC14A	BZW2	BAZ1B	ATP6V0C	ATP1B1	BCL10
CDK12	ANKRD42	CERS1	CDC25B	C11orf30	BDP1	ATP7A	ATP2A2	BEX1
CELSR3	ANKZF1	CHGA	CDKN2D	C11orf95	BLMH	ATP8B4	ATP2C1	BEX2
CEP164	ANXA11	CHKA	CHL1	C12orf76	BMPR1A	ATXN2L	ATP8B2	BEX5
CEP68	ANXA2	CHKB	CHPF	C15orf39	BOD1	AX746617	ATPAF2	BLOC1S1
CHD2	AP1AR	CLIC1	CHURC1	C15orf57	BOLA3	AX746635	ATRN	BLVRB
CHD3	AP1G2	CLU	CLCN3	C16orf70	BPTF	AX746734	ATRX	BNIP3
CHD4	AP3B2	CMTM6	CLGN	C16orf72	BRD3	AX746771	ATXN2	BOLA2
CHERP	API5	CNOT2	CLINT1	C18orf21	BRD8	AX746871	AUP1	BRE
CHIC2	APLP2	CNTN4	COMMD9	C19orf60	BRWD1	AX746989	AX747132	BROX
CKAP4	APOA1BP	COL27A1	COQ6	C1orf52	BTF3L4	AX747062	BAIAP3	BTF3
CLDN7	APOL2	COPE	CPD	C1QTNF6	BX537811	AX747150	BBS2	BZW1
CLK3	APP	COPS3	CREB3	C22orf39	C10orf137	AX747537	BC007880	C11orf24
CLPTM1	APTX	CREM	CXXC5	C2orf54	C10orf35	AX747586	BC067244	C11orf48
CMIP	ARF3	CRIP1	CYP2U1	C7	C11orf73	AX747598	BCAS2	C12orf44
CNNM3	ARFGAP3	CRYBA2	CYP4V2	C9orf16	C14orf119	AX747648	BCCIP	C12orf57
CNPPD1	ARFGEF2	CSGALNACT1	CYYR1	C9orf89	C14orf166	AX747658	BCL2L11	C12orf75
COA4	ARFIP2	CST3	DCBLD1	CABIN1	C16orf13	AX747756	BCL2L2	C14orf2
COG7	ARHGAP44	CTNND1	DDX55	CACNG4	C16orf87	AX748181	BCL9	C16orf62
COPS7B	ARHGAP5	CTNND2	DEGS1	CAND1	C17orf76-AS1	AX748420	BCLAF1	C17orf89
CRMP1	ARHGEF10L	CXorf40A	DGKD	CAPSL	C1orf63	AZU1	BEX4	C18orf32
CSNK1D	ARHGEF35	CXorf40B	DGKZ	CARD8	C2CD5	B4GALT5	BIVM	C19orf24
CSNK1E	ARID5B	CYB5D1	DHDDS	CBLB	C2orf49	BC011243	BLCAP	C19orf43
CTDNEP1	ARIH2	CYCS	DHRS7	CBX4	C4orf29	BC016143	BMI1	C19orf53
CTSH	ARL2	CYTH1	DHX32	CC2D2A	C4orf33	BC023568	BMPR2	C19orf70
CTSZ	ARL8B	DACH1	DLGAP4	CCAR1	C5orf24	BC030750	BNIP3L	C1GALT1
CUL7	ARPC1A	DCAF6	DNAJB9	CCDC88A	C5orf42	BC034684	BRAP	C1orf122
CUX1	ARPC2	DCC	DNAJC14	CCDC88C	C7orf73	BC037357	BRD1	C1orf123
DAG1	ARPC5L	DCUN1D3	DOCK10	CCL4	C8orf59	BC037540	BRD7	C1QBP
DCAF8	ARVCF	DDAH1	DPP6	CCND2	CACUL1	BC037952	BTBD1	C21orf33
DCP1A	ASAH1	DDC	DPYSL2	CCNG2	CADPS	BC038201	BTBD3	C3orf14
DCTN4	ASCC2	DDX52	DQ596274	CCRN4L	CALU	BC040637	BUB3	C4orf3
DCUN1D2	ASNS	DERA	DYNC1H1	CD55	CAMSAP2	BC040700	C10orf118	C4orf48
DDB1	ASPH	DHX15	ECE1	CD74	CAPRIN1	BC041449	C11orf54	C6orf136
DENND4A	ATAD1	DKFZp586B1922	EDARADD	CD83	CBX1	BC041646	C12orf10	C6orf48
DENND5B	ATG13	DMD	EDEM3	CDC42	CBX5	BC045805	C12orf23	C7orf50
DHRS4L2	ATP13A3	DNPH1	EEF2	CDC42SE1	CCDC14	BC050344	C16orf80	C8orf33
DHX38	ATP1A1	DOPEY2	EFNA5	CDK5R1	CCDC173	BC062350	C1D	C8orf76
DIAPH2	ATP5S	DOT1L	EIF1AD	CDK8	CCDC28B	BC063600	C1orf116	C9orf123
DIP2C	ATP5SL	DPP4	EIF2D	CDON	CCL2	BC064339	C1orf27	C9orf78
DL492557	ATP6V0A1	DQ583756	EIF3A	CDR1	CCND1	BC065763	C20orf24	CACNA2D2
DNAJB5	ATP6V0D1	DSC2	EIF3G	CELA3A	CCNT1	BC070495	C21orf58	CALR
DNAJC2	ATP6V1C1	DUSP12	ELAVL4	CELP	CCNY	BC090058	C21orf59	CAMK2D
DNAJC5	ATP6V1E1	DYNLT1	ELMO1	CELSR2	CCT2	BC141952	C3orf17	CASC3
DNAJC7	AURKAPS1	ECH1	ELMO2	CEP170	CCT8	BC150585	C5orf15	CASC4
DNM1	AX746867	EDC4	ENTPD3	CEP97	CCZ1	BCAS3	C9orf142	CAT
DQ575504	AX746920	EFNB3	EPB41	CERKL	CD200	BCL2A1	CA8	CBR4
DROSHA	AX746968	EIF4A3	EPB41L1	CFI	CDC26	BCL6	CAB39	CBWD2
DTNB	AX747628	EIF5	EPHX1	CFL1	CDC27	BEST1	CACNA1C	CBWD6
DVL3	AX748196	EIF5A	EPRS	CHD7	CDC42EP3	BIN2	CALM1	CCDC24
DYNLL2	B2M	ELF1	ERO1LB	CIDEB	CDC42SE2	BLOC1S1-RDH5	CALM2	CCDC53
DYRK1A	B3GAT3	ELF2	EXOC3	CIRH1A	CDC5L	BMP2K	CAMK2B	CCNH
EFCAB14	B3GNT1	ELL2	FAM105A	CITED2	CDK5	BPI	CAMK2N1	CD164
EGFEM1P	B3GNT5	EMC10	FAM115A	CKAP2	CDK6	BRD4	CAPN2	CD320
EIF2B4	B3GNT9	ENPP1	FAM115C	CKB	CDKN2AIPNL	BX537742	CAPN7	CD46
EIF3C	B4GALT4	ENSA	FAM117A	CKS2	CELA3B	BX647356	CAPZA2	CD59
EIF4G1	BAG3	ERGIC3	FAM118B	CLDN3	CEP112	C12orf55	CARKD	CD81
ELMSAN1	BAG5	ESRRG	FAM149A	CLIP3	CEP350	C12orf65	CASP3	CDH10
ELOVL5	BAG6	EXOSC10	FAM162A	CLK4	CEP57	C14orf178	CBWD1	CDIPT
ENTPD4	BBIP1	EZR	FAM192A	CLPS	CEP63	C19orf55	CBWD3	CDK4
EP400	BC005905	F10	FAM219B	CLSTN3	CETN2	C19orf59	CBX3	CDS2
ERAP1	BC006435	F11R	FBXO17	CNN3	CFDP1	C19orf66	CBY1	CECR1
ERGIC1	BC010924	FABP1	FKBP15	CNOT6L	CHCHD7	C1orf162	CCDC104	CECR5
ETF1	BC014119	FABP5	FLCN	CNPY3	CHD8	C1QL1	CCDC115	CELF1
FADS2	BC016015	FAM107B	FLJ31306	COL14A1	CHD9	C21orf62	CCDC47	CERS2
FAM134C	BC045789	FAM110B	FMN2	COL1A1	CHM	C2orf68	CCDC6	CHCHD1
FAM193A	BC050599	FAM131C	FNDC3B	COL1A2	CKAP5	C3AR1	CCDC91	CHCHD2
FAM57A	BC053935	FAM195B	FOXN2	COL3A1	CLASP1	C5AR1	CCDC93	CHCHD5
FAM65A	BC073897	FAM46A	FOXO3	COL6A1	CLASP2	C9orf85	CCNL2	CHID1
FASN	BCAP31	FBLL1	FXYD2	COL6A3	CLDN4	CALCOCO1	CCNT2	CHMP5
FBXW7	BCAT2	FBRSL1	GFPT1	COPG2	CLDND1	CAMKK2	CCSER2	CHTF8
FGFR1	BCL2L1	FBXL5	GIT1	CPA1	CLK1	CAP1	CCT3	CHTOP
FLJ45340	BCL7B	FBXO9	GLIS3	CPA2	CLK2	CAPN3	CCT6A	CKLF
FLNB	BECN1	FCHSD2	GLP1R	CPSF1	CLNS1A	CAPNS1	CD2AP	CKMT1A
FNBP4	BEND7	FEV	GLRA1	CR749695	CLPX	CASP2	CDC123	CKS1B
FOXJ2	BET1L	FNTA	GLTSCR2	CR936829	CNOT4	CBFA2T3	CDC16	CLPP
FOXK1	BLOC1S6	FRS2	GMPPA	CREBBP	CNOT6	CCDC120	CDC42BPA	CMC1
FOXO1	BLVRA	FXYD3	GOLGA8B	CRK	CNOT7	CCDC122	CDK13	CMTM4
FOXP1	BNIP2	FXYD5	GPS2	CRKL	COG3	CCDC125	CDK9	CMTM8
FRY	BOD1L1	FXYD6	GPSM1	CS	COG4	CCDC36	CDKN1B	CNNM1
FTSJ3	BRI3	G6PC3	GRB10	CSNK1G1	COG6	CCDC88B	CDKN1C	CNNM2
FUS	BRMS1	GAA	GREB1	CSRNP3	COL4A3BP	CCL5	CDV3	CNOT11
FYCO1	BSDC1	GAB1	GREM1	CTBP2	COPB2	CCSER1	CEBPZ	CNPY2
GAB2	BTD	GATM	GRPEL1	CTGF	COPS4	CD177	CELF4	COG5
GAPVD1	BTG3	GATSL2	GSN	CTRB1	COPS5	CD24	CEP104	COMMD1
GATAD2A	BUD31	GC	GTF3C1	DANCR	COQ10A	CD27-AS1	CEP95	COMMD3
GBF1	C10orf10	GCG	GTPBP2	DBN1	COQ4	CD276	CGRRF1	COMMD7
GDI1	C10orf113	GCH1	HADH	DCAF12	COX20	CD37	CHCHD3	COPRS
GGA3	C11orf58	GCNT1	HARS	DCAF16	COX5A	CD44	CHD1	COQ9
GLYR1	C16orf45	GFOD2	HDAC6	DCAKD	CREB1	CD53	CHD6	COX16
GNA11	C19orf10	GLI3	HDAC9	DCDC5	CRNKL1	CD68	CHMP1B	COX17
GNAO1	C1orf168	GLS	HERC2	DCN	CSNK2A1	CD97	CHMP3	COX4I1
GNAZ	C1orf174	GNAI1	HHATL	DCX	CSTF3	CDA	CHMP4A	COX5B
GNE	C1orf43	GNB2	HIPK1	DDAH2	CTCF	CDHR4	CHN1	COX6B1
GON4L	C1orf51	GNG10	HM13	DDX17	CTDSPL	CDK14	CHORDC1	COX6C
GOSR1	C2CD4B	GNG5	HS6ST1	DDX39B	CTNNB1	CDK16	CISD2	COX7A1
GPATCH2L	C2orf74	GPC6	HSD17B7	DDX56	CTRB2	CEACAM1	CLN5	COX7A2
GPATCH8	C3orf37	GPR119	HSDL1	DDX6	CTRC	CEACAM6	CLTC	COX7B
GPBP1L1	C5orf45	GPR3	HUS1	DENND2A	CUL4B	CEACAM8	CMC2	COX7C
GPI	C6orf1	GRIK2	HYOU1	DIRAS2	CWC15	CELF2	CNBP	COX8A
GTF2F1	C6orf106	GRINA	IAPP	DKK3	CWC27	CELF3	CNIH	CPQ
GTPBP4	C6orf89	GSTA4	IGBP1	DLG5	CYB5A	CFLAR	CNP	CPSF6
GUSBP1	CACNA1D	GSTK1	IGF1R	DMPK	DAPK1	CGGBP1	CNST	CREBRF
GUSBP11	CACYBP	GTF2IP1	ILF3-AS1	DMXL2	DBNL	CHI3L1	COMMD4	CREG1
HDAC5	CAMK2N2	H2AFY2	INS	DNAJA1	DCAF10	CHP1	COMMD6	CRELD1
HELZ	CARS	HIGD1A	ISOC1	DOCK7	DCAF5	CHRNB4	COPB1	CSNK2B
HERPUD2	CAST	HIGD2A	KCNB2	DOCK8	DCP1B	CIDECP	COPS2	CSRP1
HGSNAT	CBFB	HIST2H2AA4	KCNH2	DPAGT1	DCTN5	CIZ1	COPS6	CTBS
HIF1A	CBR1	HIST2H2BE	KCNJ11	DPEP1	DDHD2	CLC	COX11	CTNNBL1
HIP1R	CBR3	HIST2H4A	KCNQ2	DPH1	DDX3X	CLEC12A	COX7A2L	CUTA
HIPK2	CBR3-AS1	HMGB3	KDM1B	DQ577731	DDX46	CMTM1	CPB1	CYB5D2
HIST1H1E	CBX7	HMGN2	KIAA0226	DQ581019	DDX47	CNN2	CPSF2	CYC1
HIST1H2BC	CC2D1B	HMGN3	KIAA0247	DQ586822	DECR1	CNOT3	CPSF4	DAD1
HIST1H2BD	CCDC107	HMP19	KIAA0319L	DUOX1	DEDD	CNTRL	CRBN	DBI
HIST1H2BG	CCDC109B	HN1	KIAA0355	DUSP10	DHCR7	COL17A1	CREBL2	DCTN3
HIST4H4	CCDC28A	HNRNPA1	KIAA1715	DUSP2	DHX36	COMT	CRYZ	DCTN6
HUWE1	CCDC59	HPN	KIAA1932	DUSP7	DIABLO	CORO1A	CSNK2A2	DCXR
HYPK	CCDC84	HPS1	KIF1A	DUSP8	DICER1	CPNE1	CTDSP2	DDIT4
IFNGR2	CCNC	IFI6	KIF5C	E2F5	DKC1	CPNE2	CTR9	DDT
IL1R1	CCND3	IFRD1	KLHL42	EDN3	DKFZp667P0924	CPSF3L	CXorf57	DDX18
IL6ST	CCNG1	IMPA2	LARP1	EGR1	DKFZp779K0112	CPSF7	CYB561	DDX42
ILF3	CCS	INSR	LENG8	EGR2	DLG4	CR627206	CYB5B	DENND4C
INO80D	CCT5	IP6K2	LIMS1	EGR3	DMTF1	CRISP3	CYP51A1	DGCR2
IRGQ	CCT7	IQSEC3	LINC00152	EGR4	DMXL1	CRTC2	DAAM1	DGUOK
ITSN2	CD151	IREB2	LINC00263	EHMT2	DNAJA2	CRYBB2P1	DAXX	DKFZp547H118
IWS1	CD99	IRX1	LINC00673	EIF4EBP2	DNAJC15	CRYZL1	DDX5	DMKN
JOSD1	CD99L2	IRX2	LLPH	EIF4ENIF1	DNAJC21	CSF3R	DERL2	DNAJB6
KANSL2	CDC37	ITFG3	LOC100288069	EIF4G2	DNAJC9	CST7	DHX30	DNAJC19
KAT6A	CDC37L1	ITGB1	LOC150776	EML4	DNALI1	CTSG	DHX40	DNAJC8
KAT7	CDC42BPB	ITM2C	LOC154761	EP300	DPF2	CTSS	DHX9	DNPEP
KCND3	CDC73	ITPK1	LOC339047	EPB41L4A	DPY19L3	CXCL2	DIP2A	DPCD
KDM2A	CDCP1	ITPR1	LRRTM3	EPOR	DQ573015	CXCR2	DLD	DPM3
KDM4C	CDIP1	JMJD8	LUZP6	ERF	DQ594001	CXCR4	DLG1	DPP7
KDM5A	CDK11A	KANK1	MAATS1	ERP27	DRG1	CXorf56	DMAP1	DPY30
KDM5C	CDK5RAP2	KCNH6	MAFA	ETV3	DUSP11	CYB5R3	DNAJB1	DQ574852
KIAA0100	CDKN1A	KCNIP1	MAGT1	EVA1B	DYM	CYBB	DNAJB11	DSG2
KIAA1217	CDR2	KCNJ3	MAP1A	EVI5	DYNC2LI1	CYFIP2	DNAJC1	DSTN
KIAA2018	CDYL	KCNMB2	MAP1B	EYA3	DYNLL1	DACT3	DNM1L	DTNA
KLF10	CEBPG	KCTD12	MAP2	FAM117B	DYRK2	DAGLB	DOCK1	DUSP5
KLHL18	CELA2A	KCTD3	MAPRE3	FAM127A	EEF1B2	DEFA1	DQ570835	DUT
KMT2A	CELF6	KDELR2	MAPT	FAM13B	EIF3E	DEFA1B	DSCR3	DYNC1LI1
KMT2C	CENPC1	KIAA1377	MAST4	FAM222B	EIF4A2	DEFA4	DSP	DYNLRB1
LAT2	CERK	KIAA1549L	MAU2	FAM53C	EIF5B	DENND3	DST	DYRK4
LETM2	CERS5	KIAA1671	MBD6	FAM60A	ELAVL1	DENND5A	DTX3	E2F4
LIG3	CFL2	KIF12	MBNL1	FAM63A	ELOF1	DESI1	DUSP1	EBP
LINC00473	CHGB	KL	MCF2L2	FARP1	ELP4	DFFA	DUSP26	ECD
LINC00674	CHMP2A	KLF11	MCTP2	FAT1	ENY2	DJ031144	DYNC1LI2	ECHS1
LOC100132832	CHMP2B	KLHL3	MDC1	FBLN1	EPC2	DL490908	DZIP3	ECI1
LOC100272216	CHMP4B	KRT19	MDM2	FBXL20	ERBB2IP	DLK1	E10222	EDF1
LOC440354	CHPF2	KRT8	ME3	FER	ESD	DLST	EBAG9	EEF1A1
LPP	CHRAC1	LAMB1	MEGF9	FERMT2	ESYT2	DMTN	EBPL	EIF1
LRP10	CIAO1	LBH	MESDC2	FGD4	EVL	DNM2	ECI2	EIF1AX
LRPAP1	CIB1	LCLAT1	MGAT4A	FKBP1A	EXD2	DNMT1	EFR3A	EIF1B
LRRC37A2	CIR1	LDB2	MLEC	FLJ39739	EXOC7	DOK3	EGLN1	EIF2B5
LRRC37A3	CIRBP	LDHA	MLLT6	FLRT2	EXOSC4	DOK4	EHBP1	EIF3F
LRRC37A4P	CKMT1B	LEPROTL1	MLXIPL	FLRT3	EXT2	DPY19L2P2	EI24	EIF3I
LRRC59	CLCC1	LIMA1	MNX1	FLVCR1	FAM104B	DQ598910	EID1	EIF3K
LSR	CLDN12	LINC00641	MPP1	FMNL2	FAM120AOS	DQ599872	EIF2A	EIF4E3
MAP3K13	CLIP1	LMO7	MRPS10	FNBP1	FAM136A	DQ786325	EIF2AK3	EIF4EBP1
MAP4	CLIP4	LOC145837	MTDH	FOSB	FAM178A	DYSF	EIF2S1	ELF3
MAP4K4	CLPTM1L	LOC550643	MTHFD2	FOSL2	FAM208A	ECEL1	EIF2S3	ELP2
MAP7	CLSTN1	LOC652276	MYH14	FOXP2	FAM91A1	EFHD2	EIF3J	EMC6
MAPK10	CLTA	LOC728875	NADSYN1	FRMD4B	FAM92A1	EFNB1	EIF3J-AS1	EMC7
MASP2	CLUHP3	LOXL4	NBPF24	FSTL1	FAR1	EHD1	EIF3L	EMC8
MDH2	CMPK1	LPAR1	NBPF9	GATAD2B	FBXL2	EHMT1	EIF4E	EMD
MED13L	CNDP2	LPGAT1	NBR2	GCK	FBXL3	ELANE	EIF4E2	ENPP5
MED27	CNKSR3	LPPR1	NCOA2	GEMIN7	FBXL4	ELFN2	ELK4	ENTPD6
MED29	CNOT8	LPPR2	NCOR2	GHRL	FDFT1	EMB	EMC2	EPB41L4A-AS1
MINK1	CO9	LPPR4	NDRG4	GIPR	FEM1B	EMP2	ENOPH1	EPS15
MLH1	COA5	LRRC4	NEFM	GIT2	FGF14	EPX	ENOSF1	ERH
MLXIP	COA6	LSM2	NFE2L1	GLIPR2	FGFR1OP2	ERAL1	EPB41L2	ERP29
MRPL28	COBL	LTBP3	NFIC	GLUL	FN1	ERG	EPB41L5	ETFA
MRPS18A	COBLL1	MAFF	NIN	GNG2	FNBP1L	ERLIN1	EPM2AIP1	EXOSC7
MTA2	COG1	MAGED1	NKX2-2	GOPC	FOS	ETS2	EPT1	FAM210B
MTHFR	COG2	MAGI2	NKX6-1	GP2	FOXA2	ETV1	ERC1	FAM213A
MTMR1	COPA	MAMLD1	NOL8	GPC3	FRYL	EVI2B	ERCC6L2	FAM3B
MTRR	COPG1	MAN2A1	NONO	GPR125	FTO	EYA2	ERP44	FAM96A
MUC13	COPS7A	MAP3K15	NPTX2	GPR98	FTX	F8A1	ERRFI1	FAP
MYH9	COQ10B	MAP3K4	NR3C1	GPRIN3	FUBP1	FAM101B	ESRP1	FAU
MYO18A	COTL1	MAPK3	OLFM1	GPS1	FUT8	FAM127B	ETFDH	FBLN7
NAV1	COX19	MAPK6	OXA1L	GPX7	GABARAP	FAM157A	ETNK1	FBXO42
NCAM1	CPE	MARCKS	P4HB	GRB2	GABBR1	FAM160A2	EXOC4	FH
NCOA6	CPEB4	MBOAT2	PARD3	GSK3A	GALC	FAM168A	FAM118A	FHL1
NCOR1	CPLX2	MBOAT4	PARP4	GSTM1	GAS5	FAM189B	FAM133B	FIBP
NEDD4L	CPNE3	MBOAT7	PARVB	GSTM2	GATC	FAM213B	FAM160B2	FIP1L1
NEUROD1	CPNE8	MDK	PAX6	GSTM3	GDAP1	FAM221A	FAM171B	FIS1
NF2	CR936688	MED15	PCSK1	H19	GDE1	FAM222A	FAM174A	FKBP11
NFE2L2	CREB3L2	MIA2	PCYOX1	H2AFX	GDI2	FAM92B	FAM174B	FKBP1B
NFKBIZ	CREBZF	MIDN	PDE4DIP	HBA1	GLA	FBLIM1	FAM179B	FKBP8
NMT1	CRELD2	MINOS1-NBL1	PDIA4	HBA2	GLCE	FBRS	FAM204A	FKBP9
NOLC1	CRH	MIR22HG	PDX1	HBB	GLG1	FBXL13	FAM208B	FNIP2
NPC1	CRY2	MMP16	PDZD8	HBG1	GLOD4	FBXL14	FAM20B	FOXK2
NPIPL1	CRYL1	MOB4	PEPD	HBG2	GLT8D1	FCAR	FAM214A	FTH1
NRSN2	CSDE1	MPC2	PFKFB2	HCFC1	GMPS	FCER1G	FAM21B	FUCA1
NUP210	CSPP1	MPDU1	PHACTR2	HDAC2	GNB1	FCGR2A	FAM32A	GABARAPL2
NUP214	CSRNP1	MS4A8	PIGH	HDGF	GNL3	FCGRT	FAM3C	GADD45G
NUP98	CTAGE5	MVD	PILRB	HECTD4	GOLGA7	FCN1	FAM46C	GLB1
OGDH	CTBP1	MYH10	PKIB	HEPACAM2	GOLPH3	FER1L5	FAM98A	GLRX3
OGT	CTNNA1	MYL12B	PKN1	HIF3A	GPATCH2	FGR	FARSA	GLTSCR1L
OPHN1	CTSA	MYO10	PKP2	HIST1H1A	GPBP1	FKSG51	FARSB	GLUD1
ORC4	CTSB	MYSM1	PLCL2	HIST1H1D	GPR89A	FLJ00285	FBXO11	GM2A
OSBPL9	CTSD	MZT2A	PLCXD3	HIST1H2AC	GRAMD3	FLNA	FBXO25	GMPR2
OTUD5	CTSL1	N4BP2	PLEKHM2	HIST1H2AE	GSE1	FLOT2	FBXO3	GNAQ
PAK1	CTTN	NASP	PLXNB2	HIST1H2AG	GSK3B	FMNL1	FBXO30	GNB2L1
PARVA	CUEDC2	NAT14	PNLIPRP1	HIST1H2AJ	GSPT1	FOXP4	FBXW11	GNB5
PATL1	CUL1	NDRG3	PPP1R2	HIST1H2BF	GTF2B	FPR1	FKBP3	GNG12
PCDH17	CUL4A	NDUFA3	PREB	HIST1H2BK	GTF2I	FURIN	FLJ00322	GNPAT
PCNT	CWC25	NDUFS3	PRPF18	HIST1H3B	GTF3C4	FW340055	FMR1	GOLT1A
PCNX	CYB5R1	NDUFS8	PRPF3	HIST1H3I	HDAC1	G0S2	FN3K	GOT1
PCSK7	CYFIP1	NECAB2	PRPH	HIST1H3J	HDDC2	G6PD	FNDC3A	GOT2
PDPR	CYLD	NECAP1	PRSS23	HIST1H4H	HERC2P2	GCA	FOPNL	GPAA1
PHC2	CYP3A5	NEDD9	PSMB5	HMBOX1	HES1	GLIS2	FOXN3	GPR75
PHC3	CYSTM1	NFIL3	PTBP3	HMGCR	HEXIM1	GLOD5	FRG1	GPRC5C
PHF20	D2HGDH	NFKB1	PTCH1	HNF1A-AS1	HIVEP1	GLRX	FUBP3	GPX1
PKM	DAP	NGFRAP1	PTCHD3P1	HNF1B	HLTF	GMFG	FUNDC2	GPX3
PLEKHG3	DAP3	NME4	PTPN23	HNRNPA0	HMGN1	GNAI2	FXR1	GRHPR
PLEKHM1	DAPK2	NPDC1	PTPN3	HNRNPA2B1	HNRNPA3	GNG4	FYN	GRIA3
PLOD3	DARS	NPIPL2	PTPRM	HNRNPC	HNRNPD	GPR108	FYTTD1	GSTO2
POGZ	DAZAP1	NPNT	PVRL3	ID2	HNRNPK	GPR84	GABARAPL1	GSTP1
POLR2A	DAZAP2	NRBF2	RAB15	IDH2	HNRNPU	GPR97	GABRB3	GSTT2
POLR2J3	DBNDD2	NRP1	RAB3GAP1	IER2	HNRNPU-AS1	GPSM3	GADD45B	GTF2A2
POLR2J4	DCTD	NRXN1	RABL5	IFITM3	HNRNPUL2	GRAMD1B	GBAS	GTF2E2
POM121C	DCTN1	NT5C3B	RALBP1	IGF2BP2	HOOK3	GSTT1	GCC2	GUK1
POPDC3	DCUN1D4	NT5DC3	RALGDS	IGF2BP3	HP1BP3	GTF2H2C	GEM	GUSB
PPIB	DDB2	OCRL	RASA4	IGFBP5	HSD17B4	GTF2IRD2	GET4	H1FX
PPIL2	DDIT3	PAFAH1B3	RASA4CP	IGSF1	HTATSF1	GTF2IRD2B	GGNBP2	H2AFJ
PPP1R15A	DDOST	PBX1	RBBP8	ILK	HYDIN	GTPBP1	GINM1	H2AFV
PPP4R2	DDR1	PCBD1	RBCK1	IMMP1L	IAH1	GYS1	GLRX5	H2AFY
PPP6R1	DDRGK1	PCF11	RBM7	ING3	IDH1	HCAR3	GNA13	H2AFZ
PRDM2	DDX19A	PDE3B	RBP4	INS-IGF2	IDI2-AS1	HCST	GNAS	H3F3A
PRDM4	DDX24	PDK4	REG1B	INSM1	IFT46	HDAC4	GNL1	HADHB
PRKCSH	DDX27	PDZD2	REG3A	INTS6	IFT52	HID1	GOLGA5	HAT1
PRPF40A	DDX39A	PEG10	RELL1	IPO9	IMP3	HINFP	GOLGA6L9	HBS1L
PRR14L	DDX3Y	PGAP1	REPIN1	ISG20L2	IMPAD1	HIST1H2AL	GOLGA8A	HDHD3
PRR26	DDX41	PIGS	REPS1	ISL1	INPP5F	HIST1H2AM	GOLGB1	HEBP2
PRRC2B	DDX50	PIN1	RERE	ISYNA1	INTS3	HIST1H3C	GOLM1	HINT2
PRRC2C	DEAF1	PKIG	RFFL	IVNS1ABP	INTS4	HIST1H4C	GOLPH3L	HMGXB4
PSD4	DEF8	PLEKHJ1	RGCC	JUNB	IPO5	HIST1H4E	GORASP2	HN1L
PSME3	DEK	PLIN3	RGL1	JUP	IRF2	HIST2H2AB	GPN1	HNRNPAB
PSME4	DFNB31	PLXNB1	RGS16	KALRN	IRF2BP2	HIST2H2AC	GRB14	HNRNPL
PSPC1	DHPS	PMPCA	RMND5A	KANSL1	ITGAE	HKR1	GRSF1	HSD17B10
PTPLB	DHRS2	PNP	RNF130	KBTBD2	ITGB1BP1	HMGA1	GTF3A	HSD17B12
PTPN1	DHX8	POLB	RNF20	KCNJ16	JMY	HMGB2	GTF3C6	HSD17B14
PTPRJ	DIAPH1	POLDIP3	ROBO1	KCNJ2	KANSL1L	HNF1A	GTPBP6	ICMT
PTRH2	DICER1-AS1	POLR2I	ROBO2	KCNT2	KATNBL1	HNRNPUL1	HBP1	ID1
PVRL2	DIDO1	POLR2L	RPH3AL	KDM5B	KCTD20	HP	HDAC3	IER3IP1
PXK	DIP2B	POLR2M	RPL36AL	KIAA1201	KDM1A	HPCA	HDHD2	IFI27L2
PXN	DKFZp564E1082	POU6F2	RPL7L1	KIAA1467	KDM3A	HSPC047	HEBP1	IFT43
QARS	DNAJA3	PPIA	RPP38	KIF2A	KIAA1109	HYAL3	HECTD1	IGFBP2
QRICH1	DNAJA4	PPP1R13B	RPPH1	KIF3C	KIAA1279	ICAM3	HERC2P9	IMMT
RAB27A	DNAJB12	PPP1R14C	RPS18	KLF3	KIAA1958	IDH3G	HIAT1	IMPDH2
RAB3B	DNAJB2	PPP1R3B	RRAGA	KLF4	KIDINS220	IFITM2	HINT3	INTS10
RAB5C	DNAJC12	PPP1R9A	RRAGD	KLF5	KIF3A	IGDCC4	HMG20A	IRF6
RABGAP1	DNAJC3	PPP2CA	RSL24D1	KLHDC8B	KIFAP3	IGF2	HMGCLL1	IRS2
RABL6	DNHD1	PPP2R1A	SCAMP2	KLHL15	KLHDC10	IGSF6	HNRNPH1	ITFG1
RAD23B	DNTTIP2	PPP2R4	SCARNA6	KLHL7	KLHL2	IGSF9B	HNRNPH3	ITSN1
RAF1	DOCK9	PPP3CA	SCD5	KMT2E	KPNA3	IKZF1	HNRNPM	JTB
RAI2	DOM3Z	PPP5C	SEC61A1	KPNA2	KPNB1	IL1B	HNRPDL	KARS
RALGAPA2	DPM1	PPP6R2	SEMA4D	KPNA4	LAMC1	IL1RN	HOOK1	KAT8
RANBP3	DPM2	PPRC1	SEMA6D	LAGE3	LARS	IL2RG	HRAS	KIAA0196
RAP1GAP	DQ572964	PRAF2	SF3A3	LARP1B	LCORL	IL8	HSF2	KIAA1244
RAPGEF1	DQ573539	PRCC	SHC1	LASP1	LDHB	INIP	HSP90AA1	KIAA2013
RAPGEF2	DQ588114	PRKACA	SIPA1L1	LATS1	LDOC1	IRF1	HSPA4	KIF13B
RASSF5	DQ591995	PRKCE	SIPA1L2	LCOR	LEO1	ITGAM	HSPA5	KIF9
RBM10	DQ594366	PRTFDC1	SIX2	LDB1	LINC00617	ITGB2	HSPA8	KLHL41
RBM25	DTD1	PTBP2	SLC18A2	LEPRE1	LINC00657	JARID2	HSPB11	KRT18
RBM26	DTNBP1	PTP4A1	SLC33A1	LGALS1	LMBR1	JPX	HSPD1	KRTCAP2
RBM33	DTX3L	PTP4A3	SLC35F6	LIMK2	LMBR1L	KCNA3	HSPE1	LAMTOR4
RC3H1	DUSP23	PTPRD	SLC6A17	LIN7A	LNPEP	KDM6A	HSPH1	LAMTOR5
RGP1	DUSP3	PTPRT	SLC7A5	LINGO2	LOC100288142	KDM6B	IARS2	LAPTM4B
RGPD5	DYNLT3	PTRHD1	SLC8A1	LLGL1	LOC100506844	KIAA0907	ICA1	LETMD1
RIMS2	E02193	PUM1	SLMAP	LOC100093631	LOC285074	KIAA1328	IDI1	LGMN
RING1	EAF1	PYROXD2	SMAD7	LOC100288778	LOC440434	KMT2D	IFT57	LIN7B
RNF10	EAPP	QDPR	SMIM14	LOC220729	LOC654342	KSR1	IGFBP3	LINC00261
RNF149	EBNA1BP2	QSOX1	SMIM15	LOC284454	LOC728392	L2HGDH	IKBKAP	LINC00493
RNF216	ECHDC2	RAB11A	SOCS6	LOC645166	LOC96610	LAPTM5	ING2	LINC00938
RNF4	EDEM1	RAB11B	SORL1	LOC646278	LOH11CR1I	LCN2	INSIG1	LIPA
RPN1	EDIL3	RAB25	SPATA13	LPCAT1	LRCH3	LCP1	IPO7	LLGL2
RRBP1	EEF1D	RAB3A	SPCS3	LPCAT4	LRIG3	LCP2	IPW	LMAN2
RREB1	EEF1G	RABGEF1	SPP1	LPHN1	LRP6	LDLRAD3	IQGAP1	LNX1
RSRC2	EID3	RAP1A	SPRYD7	LPPR5	LRPPRC	LINC00338	ISCA1	LOC100130899
RTKN	EIF1AY	RAPGEF4	SPTAN1	LRCH4	LRRC37BP1	LINC00665	ITFG2	LOC100505876
RUNDC3A	EIF2AK1	RAVER1	SPTLC1	LUM	LRRC41	LINC00923	JAGN1	LOC113386
RUVBL2	EIF2AK2	RBBP6	SREBF1	LYPLA2	LTV1	LITAF	JAM3	LOC440335
SAFB	EIF2B1	REC8	SSH1	MAF1	LYRM1	LMO2	JHDM1D	LOC728554
SAMD4B	EIF2S2	REL	STAM	MAFB	M55536	LMO3	JKAMP	LRRC8D
SAT1	EIF3B	RFX6	STIM1	MAGED2	MAGED4B	LOC100129034	JUN	LRRFIP1
SBF2	EIF3D	RGL3	STT3A	MAML1	MAGEH1	LOC100132062	JUND	LSM10
SCAF11	EIF3H	RGS4	STX1A	MAML2	MAL2	LOC100133331	KAT2A	LSM4
SCARNA10	EIF4B	RHOA	SUN2	MAML3	MAP2K2	LOC100188947	KAT2B	LSM7
SCARNA12	EIF4G3	RIMBP2	SYNE2	MANEAL	MAP6	LOC100506321	KCNK16	LSMD1
SCARNA7	EIF4H	RLF	SYT13	MAP2K4	MAPK1	LOC23117	KIAA0146	LYPLA1
SCMH1	ELP5	RMRP	SYT7	MAP4K5	MAPKAP1	LOC283767	KIAA0232	MALSU1
SCN3B	EMC3	RNF139	SYVN1	MAPK14	MBTPS2	LOC286437	KIAA0368	MANBAL
SCYL1	EMC4	RNF150	SZT2	MAPK8IP1	MCCC2	LOC388312	KIAA0895	MANSC1
SDE2	ENO1	RPRD2	TAF15	MARCH4	MCFD2	LOC643406	KIAA0895L	MAP1LC3B
SDHAP2	ENO2	RPS6KA3	TAF1D	MARK4	MED1	LOC644215	KIAA1107	MAPK8IP2
SDK1	ENPP2	RTN1	TAOK3	MARVELD2	MED17	LOC644617	KIAA1191	MAPKAPK5-AS1
SEC24D	EP400NL	RYBP	TAZ	MAT2A	MED24	LOC731275	KIAA1429	MAPRE1
SENP5	EPAS1	S100A10	TBC1D14	MBD5	MEF2A	LPCAT3	KIAA1598	MBIP
SERTM1	EPB41L3	S100A13	TBC1D4	MCF2L	METAP2	LRRC57	KIAA1704	MBP
SETBP1	EPB41L4B	S100B	TBC1D5	MCL1	MFAP1	LRTOMT	KIAA1737	MCOLN3
SF1	EPCAM	SAMD5	TCP11L2	MCU	MFN1	LSM12	KIAA2026	MDH1
SF3A1	EPS8L2	SCAF4	TENC1	MDM4	MGA	LST1	KIF21A	MDP1
SFSWAP	ERCC3	SCAND1	TESK1	MED12	MGAT4B	LTF	KIF22	MEA1
SHISA5	ERCC5	SCARNA2	TGFBR3	MED13	MGEA5	LY6G5B	KIF5B	MED6
SIK3	ERLEC1	SEC14L1	TIMP2	MED16	MIB1	LYRM2	KLHDC2	MEMO1
SLC24A1	ERO1L	SEC31B	TIPRL	MED30	MIOS	LYRM4	KLHL11	METTL23
SLC25A23	ESYT1	SENP3-EIF4A1	TKT	MEIS1	MKLN1	LYZ	KLHL24	METTL3
SLC25A51	ETFB	SEPN1	TM9SF1	MEIS2	MKRN1	MAGED4	KPNA1	MGST2
SLC35A4	ETNK2	SEPP1	TMCC3	MEST	MLLT10	MAP2K7	KRIT1	MIEN1
SLC3A1	EWSR1	SERINC5	TMED6	METAP1	MOB1A	MAP4K2	KTN1	MIF
SMA4	EXOC1	SERPINA1	TMEM109	METTL9	MON2	MAPKAPK3	L26953	MINOS1
SMAD5	EXOSC6	SETD2	TMEM123	MEX3C	MPHOSPH6	MARK2	LAPTM4A	MLLT11
SMARCA4	EZH1	SEZ6L	TMEM167A	MFAP2	MPZL1	MARK3	LARP4	MMADHC
SMARCC2	FADS1	SEZ6L2	TMEM17	MFAP3	MRAP2	MCMBP	LEPROT	MOB1B
SMC1A	FAF1	SF3B4	TMEM175	MICAL1	MRFAP1L1	MED14	LIN7C	MORN2
SMG1P1	FAF2	SFPQ	TMEM181	MKI67	MRPL34	MED18	LINC00643	MORN4
SMG5	FAM102A	SGTA	TMEM184B	MKI67IP	MRPL42	MED25	LINC00948	MPDZ
SNRNP70	FAM104A	SH3BGRL	TMEM25	MLF2	MRPS30	MEG3	LOC100505761	MPI
SPAG9	FAM105B	SH3KBP1	TMEM37	MOV10	MRPS35	METTL2A	LOC100506123	MPV17
SPATA2	FAM120A	SH3PXD2A	TMEM63C	MPHOSPH9	MRPS6	MFAP4	LOC100506548	MRPL13
SPDYE2B	FAM120B	SH3RF1	TMOD2	MRPL30	MRS2	MGC4836	LOC100506710	MRPL14
SPEN	FAM134A	SIDT2	TMX1	MRPL52	MSL1	MGRN1	LOC100506990	MRPL18
SPINT1	FAM135A	SIMC1	TNFAIP3	MSH6	MSL2	MID1IP1	LOC285419	MRPL20
SPRED2	FAM159B	SIN3B	TNIK	MSMO1	MT1G	MIPOL1	LOC401397	MRPL21
SREBF2	FAM167A	SIPA1L3	TNIP1	MT1H	MTCH2	mir-223	LOC93622	MRPL23
SRPK1	FAM168B	SKIL	TNS1	MTA1	MTFR1L	MKL1	LPIN1	MRPL24
SRPK2	FAM177A1	SLC22A17	TOM1L1	MTHFD2L	MTMR4	MMP8	LQFBS-1	MRPL27
SRRM1	FAM199X	SLC25A22	TPPP	MTMR2	MTX2	MMP9	LRBA	MRPL33
SRRM2	FAM219A	SLC25A44	TRAP1	MXD1	MYCBP2	MNDA	LRRC23	MRPL35
SRRT	FAM21C	SLC35A2	TRIM8	MXD4	MYEOV2	MOB3A	LRRC47	MRPL36
SRSF10	FAM27A	SLC38A4	TRPM3	MYLIP	MYO9A	MORC4	LSM1	MRPL37
SSRP1	FAM27E3	SLC39A13	TSHZ1	MYO15B	NAA35	MPO	LSM14A	MRPL40
STAT5B	FAM47E-STBD1	SLC40A1	TSPAN1	MYT1	NAF1	MRP63	LSM3	MRPL41
STAT6	FAM50A	SLC41A1	TSPYL5	NAA40	NANOS1	MRPL4	LSM6	MRPL43
STIP1	FAM58A	SLC41A2	TTC7B	NBPF1	NBPF12	MS4A3	LSS	MRPL51
STK35	FASTKD5	SLC6A8	TTC8	NBPF10	NBPF14	MSH5-SAPCD1	LUC7L	MRPL53
STMN2	FBL	SLC7A14	TUBA1C	NCBP1	NBPF15	MSN	LUC7L2	MRPL54
SUPT6H	FBXL16	SLC7A2	TUBB2A	NCOA7	NCL	MSRB1	LUC7L3	MRPL55
SUZ12P1	FBXO21	SLC7A8	TVP23C	NDN	NCOA3	MTF1	LYSMD2	MRPS11
SYMPK	FBXO7	SMAP2	TXNDC15	NDST1	NDUFB3	MTFMT	LYSMD3	MRPS14
SYP	FBXW4	SMARCA1	TXNRD1	NEO1	NEK7	MTRNR2L1	MAGI2-AS3	MRPS16
SYS1	FDPS	SMOC1	UBE2E3	NEURL	NELFA	MTRNR2L10	MAN1A2	MRPS21
SYT5	FEM1C	SNED1	UBE3C	NEUROG3	NIPSNAP1	MTRNR2L2	MANF	MRPS22
TACC2	FKBP1AP1	SNORA53	UBXN1	NFAT5	NLK	MTRNR2L3	MAP2K1	MRPS23
TAF1	FKBP2	SNORA74B	UCHL1	NFATC3	NMD3	MTRNR2L6	MAP9	MRPS24
TAPBP	FKBP4	SNORD17	ULK3	NFIB	NOA1	MTRNR2L8	MARCH8	MRPS26
TBC1D8B	FKBP5	SNRPB	UNC13B	NFYC	NOL11	MTSS1L	MATR3	MRPS28
TCERG1	FKSG56	SNRPG	USE1	NID1	NOL4	MXD3	METTL17	MRPS33
TCF20	FLJ43663	SORBS1	UTP14C	NISCH	NPEPPS	MYADM	MFSD6	MRPS34
TEX2	FLOT1	SORD	VAT1	NKIRAS2	NR2F6	MYB	MGST3	MT1X
TGFBRAP1	FNIP1	SOX5	VAT1L	NKRF	NRD1	MYD88	MIA3	MTA3
TGM2	FOCAD	SPATS2L	VEGFA	NME7	NSDHL	MYO1F	MIER3	MTERFD2
TJP1	FOXJ3	SPOCK3	VLDLR	NNAT	NUMB	NAA60	MKL2	MTHFS
TM9SF4	FRMD6-AS1	SPPL3	VTI1B	NPAS4	NUP50	NAAA	MKNK2	MTPAP
TMEM214	FTH1P3	SRSF7	VWDE	NR4A1	NUP62	NABP2	MLF1	MUC1
TMEM63B	FTL	SS18L2	WARS	NR4A2	NUP88	NADK	MLLT4	MYL12A
TMEM8A	FUCA2	SSBP4	WASF3	NR4A3	NUPL1	NAMPT	MLX	MYL6
TMOD3	G3BP1	SSTR1	WASH2P	NRAS	OARD1	NBEAL2	MMS19	MYL6B
TMX2-CTNND1	G3BP2	SSTR2	WASH5P	NRBP1	OAZ2	NBPF8	MNAT1	MZT2B
TNRC6B	G6PC2	SSX2IP	WASH7P	NRBP2	OLA1	NCF1	MOAP1	NAA20
TOX	GABPB2	ST7	WBP2	NREP	OSBP	NCF2	MOCS2	NAE1
TRAPPC10	GAD2	STAT4	WDR45	NRIP1	OSBPL8	NCF4	MORF4L2	NCALD
TRIM26	GADD45A	STK32A	WDR74	NSD1	OTUD4	NCK2	MPHOSPH8	NCOA4
TRIM33	GAK	STK32B	WHAMMP1	NSMF	OXCT1	NCKAP5	MRGBP	NCSTN
TRIO	GALNT11	SYNGR2	WLS	NT5DC2	OXSR1	NDST2	MRPL3	NDUFA1
TRIP12	GARS	SYNPO	WSCD2	NUFIP2	PA2G4	NDUFV3	MRPL32	NDUFA11
TRPC4AP	GBA	SYT17	XPOT	NUTF2	PAICS	NFKBIA	MRPL49	NDUFA13
TRPM7	GBA2	TAF10	XRCC1	NXF1	PAK2	NFKBID	MRPL9	NDUFA2
TRRAP	GCLC	TCEAL5	ZBTB20	NXN	PANK2	NFS1	MRPS17	NDUFA4
TTLL5	GCLM	TCTA	ZHX3	OBSL1	PANK3	NKAIN1	MRPS31	NDUFA5
TXNDC11	GDA	TET2	ZMIZ1	OGN	PBXIP1	NKAP	MSANTD4	NDUFA7
UBA6	GDF15	TICAM1	ZNF483	PABPC1	PCM1	NKG7	MT1F	NDUFA9
UBAP1	GGA2	TIMM17B	ZNF770	PABPC1L	PCMTD1	NOP14	MT2A	NDUFAB1
UBAP2	GHITM	TJP2	ZZEF1	PALM	PCNA	NPC1L1	MTERFD3	NDUFAF3
UBAP2L	GID8	TLE2		PAPOLG	PCNXL4	NUMBL	MTMR12	NDUFB1
UBE2D3	GIGYF2	TLE3		PAPSS1	PCP4	NUTM2A-AS1	MTMR7	NDUFB10
UBE2I	GLO1	TM4SF1		PBRM1	PDCD5	NVL	MTRF1L	NDUFB11
UBE2N	GNA12	TMED4		PBX2	PDCD7	ODF2L	MTSS1	NDUFB2
UBE2O	GNL2	TMED8		PCGF2	PDHB	OLFM2	MYO6	NDUFB4
UBE2R2	GNPDA1	TMEM164		PCNXL3	PDS5B	OLFM4	MYT1L	NDUFB5
UBN1	GNPTG	TMEM236		PDCD10	PDZD11	OLR1	N4BP2L2	NDUFB6
UBR4	GNS	TMEM45B		PDK2	PEG3	OST4	NACA	NDUFB7
UBR5	GOLGA2	TMEM51		PDLIM4	PHF10	OTUB1	NAGK	NDUFC1
UIMC1	GOLGA3	TMEM88		PDLIM7	PHF14	P2RY13	NAIP	NDUFC2
USB1	GOLGA4	TMSB10		PEX2	PHF20L1	PADI4	NAP1L1	NDUFS1
USP10	GORASP1	TNFRSF19		PFKL	PHF3	PCBP1-AS1	NAP1L4	NDUFS4
USP24	GOSR2	TNKS		PHB2	PHKB	PCIF1	NAPB	NDUFS5
VAMP2	GPR56	TOX3		PHC1	PIAS2	PDDC1	NARF	NDUFS7
VARS	GPRASP1	TP53I13		PHF21A	PICALM	PDE4D	NARG2	NEDD8
VCL	GPSM2	TPD52L1		PHF23	PIGF	PEAK1	NBAS	NENF
VEZF1	GPX4	TPST1		PHF6	PIK3C2A	PEX13	NBEA	NFU1
VPS53	GRIA2	TRAF4		PHKG2	PIK3C3	PFKFB3	NCBP2	NHP2
VRK3	GRIPAP1	TRNP1		PHYHIPL	PIK3R3	PGD	NCOA1	NHP2L1
WAPAL	GRN	TSPAN3		PIAS1	PIKFYVE	PGLYRP1	NCOA5	NIPA2
WDR20	GSR	TSPAN33		PIAS3	PIM1	PGM5P2	NDFIP1	NIPSNAP3A
WDR26	GSS	TTC19		PIGU	PIP4K2B	PGS1	NDUFA6	NIT2
WDR82	GSTA1	TTN		PIM2	PITPNB	PHACTR4	NDUFA8	NME1
WIPF2	GSTO1	TUBA4A		PIP5K1A	PKN2	PHF12	NDUFAF2	NME2
WTAP	GTF3C5	TUSC3		PLAG1	PKP4	PHKA2	NEK9	NME3
YEATS2	GUF1	TXNDC5		PLD3	PLK2	PI4KAP1	NEMF	NOP10
YY1AP1	GUSBP3	U80764		PLEKHB1	POLK	PIGQ	NF1	NPC2
ZBED6	GYG1	UBALD2		PLEKHH1	POLR1C	PIK3C2B	NGRN	NPCEDRG
ZFR	H1F0	UBB		PLS3	POLR1D	PILRA	NHLRC2	NSF
ZNF207	H3F3B	UBE2A		PLXNC1	POLR2B	PIPOX	NINL	NSUN5P2
ZNF318	HABP4	UBE2D2		PMS2P5	POR	PITPNM1	NIPA1	NUCB1
ZNF394	HADHA	UBE2G1		PNRC1	PPIP5K2	PKNOX1	NIPBL	NUDCD2
ZNF592	HAGH	UFC1		POMGNT1	PPM1B	PLAC8	NKTR	NUDT16L1
ZNF609	HAX1	UGT8		POSTN	PPP1CC	PLAGL1	NMRK1	NUP133
ZXDC	HDLBP	UPF1		POU2F1	PPP2R2A	PLAGL2	NOMO3	NXT1
	HERC1	UQCR10		PPDPF	PPP3R1	PLAUR	NOP56	OAT
	HERPUD1	USH1C		PPFIBP1	PPP6C	PLBD1	NOP58	OAZ1
	HEXA	USP15		PPIEL	PPTC7	PLEK	NOVA1	ORC3
	HEXB	USP27X		PPP1CA	PRKAA1	PLEKHA6	NPIP	ORC6
	Hfb1	VGF		PPP1R11	PRKAG1	PLEKHG2	NPM1	ORMDL2
	HGS	VPS28		PPP1R12A	PRKCI	PLIN2	NR2C2	OSER1
	HIBADH	WDR34		PPP1R15B	PRMT10	PLP2	NRCAM	OVCA2
	HIST1H1C	WDR77		PRCP	PRMT5	PLXNA3	NUBP1	P4HA2
	HIVEP2	WEE1		PRKAB2	PRPF38A	PMF1	NUCKS1	P4HTM
	HIVEP3	WFDC2		PRMT1	PRPF4B	PNPLA2	NUDT2	PAM16
	HLA-A	WWC1		PRRC2A	PRPS1	PNPO	NUDT4	PARK7
	HLA-B	YIPF2		PSEN1	PRSS1	POM121	OCIAD1	PARN
	HLA-C	ZC3HAV1		PTBP1	PSD3	POU5F1	OCIAD2	PARP9
	HLA-E	ZDHHC14		PTMS	PSIP1	PPP1R13L	OCLN	PCCB
	HLF	ZNF131		PTN	PSMA2	PPP1R18	ODC1	PCMT1
	HMGB1	ZNF331		PTP4A2	PSMA4	PPP4C	OFD1	PDCD2
	HMGCL	ZNF410		PTPN12	PSMA6	PRAM1	OPA1	PDCD2L
	HMOX1	ZNF462		PTPRS	PTDSS1	PRG2	ORMDL1	PDCD6
	HNRNPF	ZNF532		PTTG1	PTMA	PRKCD	OSGEP	PDE6D
	HNRNPR	ZNF586		PXDN	PTOV1	PRODH	OXLD1	PDE9A
	HNRNPUL2-BSCL2	ZNF608		PYY	PTOV1-AS1	PROK2	PABPC4	PDIA3
	HOOK2	ZNF618		QTRT1	PTPN2	PRR14	PAFAH1B1	PDK3
	HOPX	ZNF644		R3HDM1	PUM2	PRR19	PAIP1	PDXDC1
	HPRT1			R3HDM4	PWP1	PRSS27	PAPD7	PELI2
	HSF4			RAB1B	PWWP2A	PRTN3	PAPOLA	PET100
	HSPA13			RAB2B	PYGO2	PSTPIP2	PARG	PEX11B
	HSPA1A			RAB3D	QSER1	PTAFR	PARP2	PEX19
	HSPA1B			RARRES2	RAB10	PTGS2	PARP6	PFDN5
	HSPA4L			RBM12	RAB33B	PTK2B	PAXBP1	PGAM1
	HSPA6			RBM34	RAB3IP	PTPN18	PCDHGB7	PGLS
	HSPA9			RBM38	RAB5B	PTPN6	PCGF3	PGM1
	HSPB1			RBP1	RAB6A	PTPRE	PCLO	PHB
	HTATIP2			RFX3	RABGAP1L	PTPRF	PCNXL2	PHPT1
	HTT			RFX7	RAD21	PVRL1	PDCL3	PIGC
	HYI			RGAG4	RAD51C	PYCARD	PDE8B	PIGP
	IARS			RGS2	RALA	PYCR1	PDHX	PIGT
	IBTK			RNASE1	RALGAPB	PYGL	PDS5A	PIM3
	ICA1L			RNF167	RALGPS1	RAB36	PDXP	PLBD2
	ICT1			RNF38	RANBP9	RAB4B	PDZRN3	PLS1
	IDH3A			RPL10A	RARS	RAB8A	PFKM	PMM1
	IDNK			RPL28	RARS2	RAC2	PFN2	PMVK
	IDS			RPL41	RASA1	RAPGEF5	PGRMC1	PNISR
	IER3			RPP21	RBBP4	RARA	PGRMC2	PNKD
	IFI27L1			RPS24	RBBP7	RASA4B	PHF2	POLR2G
	IFI30			RPS26	RBFOX2	RASEF	PHIP	POLR2J
	IFNGR1			RRM2	RBM17	RASGRP3	PHLDB2	POLR2J2
	IGF2R			RSC1A1	RBM22	RASGRP4	PHTF1	POLR2K
	IGFBP7			RTN3	RBM5	RETN	PI4KAP2	POMP
	IK			RUNX1T1	RBM8A	RF00017	PIH1D1	POP7
	IL17RB			RUSC1	RBPJ	RF00090	PITHD1	PPA1
	IL6R			SAP130	RBPMS	RF00100	PITPNA	PPA2
	ILKAP			SARNP	RCN2	RGS19	PITPNA-AS1	PPHLN1
	IMP4			SBNO1	REV3L	RHOG	PJA1	PPIF
	INA			SCLT1	RFWD2	RICTOR	PKD2	PPP2CB
	INADL			SCN9A	RHOBTB3	RNASE2	PLA2G12A	PPP2R1B
	INHBA			SEC24A	RHOT1	RNASE3	PLA2G1B	PPP2R2D
	INPP1			SEMA6A	RIOK1	RNF24	PLCB4	PPP3CB
	IRAK1			SERPING1	RNF146	RNF41	PMPCB	PPY
	ISCU			SERTAD1	RNF214	RNF44	PNMA1	PRDX3
	ITGB5			SERTAD2	RNF5	RPL10	PNMAL1	PRDX4
	ITM2B			SERTAD3	RNF7	RPL13AP3	PNRC2	PRDX6
	ITPR3			SESN3	RNF8	RPL13AP6	POLI	PSMA1
	JAK1			SETD5	RPA2	RPL39L	POLR2C	PSMA3
	JAZF1			SETD6	RPL13AP20	RPUSD3	PON2	PSMA5
	JMJD1C			SF3B1	RPL22L1	RTDR1	PPID	PSMB3
	JMJD6			SGMS1	RPL23	RUNX1	PPIG	PSMB4
	KAT5			SH3GLB2	RPL26	S100A11	PPP1R14B	PSMC2
	KCNK1			SIAH2	RPL29	S100A12	PPP1R21	PSMD10
	KCNK17			SIK1	RPL31	S100A8	PPP1R3E	PSMD13
	KCNK3			SIM1	RPL34	S100A9	PPP2R5C	PSMD8
	KCNMA1			SKI	RPL35A	S100P	PPP6R3	PSMG2
	KCTD10			SLC12A6	RPL37A	SAMSN1	PREPL	PSMG3
	KDELR1			SLC16A9	RPL5	SCARNA9	PRKACB	PTK2
	KDM3B			SLC22A5	RPL6	SCIN	PRKDC	PTPLAD1
	KDM5D			SLC25A37	RPL7	SELL	PRKRA	PTPRN2
	KHNYN			SLC25A53	RPL7A	SEMA4B	PRNP	PTS
	KIAA0430			SLC2A3	RPS14	SEPT5-GP1BB	PRPF38B	PTTG1IP
	KIAA1033			SLC31A1	RPS15A	SERINC2	PRPF39	PVR
	KIAA1147			SLC35D1	RPS16	SERPINB2	PRPSAP2	PYGB
	KIAA1324			SLC35E2B	RPS21	SETD1A	PRRC1	QPCT
	KIAA1683			SLC37A4	RPS27	SGK494	PRUNE	R3HCC1L
	KIAA1967			SLC38A2	RPS27A	SH2D3C	PSMD1	RAB2A
	KIF13A			SLC39A10	RPS5	SH3BGRL3	PTEN	RAB3C
	KIF1B			SLC4A8	RRAGB	SH3GL1	PTPN13	RAB7L1
	KIF3B			SMARCB1	RSL1D1	SHKBP1	PTPRA	RABAC1
	KIFC2			SMARCD1	RTCA	SHOX	QSOX2	RAC1
	KLC1			SMTN	RTF1	SIGLEC14	RAB14	RAE1
	KLC2			SNAPC3	RWDD1	SIGMAR1	RAB1A	RAP2B
	KLF6			SNHG1	SACM1L	SIRPB1	RAB22A	RB1
	KLF9			SNHG12	SALL2	SLA	RAB26	RBM47
	KPNA6			SNHG16	SCARNA5	SLC11A1	RAB5A	RBMX2
	KRAS			SNORD116-20	SCCPDH	SLC29A1	RABEP1	RBX1
	KXD1			SOCS3	SDCCAG8	SLC29A4	RAD50	RCN1
	LAMP1			SOGA1	SEC24B	SLC35E1	RALGAPA1	REEP3
	LAMP2			SOS2	SEC61A2	SLC43A2	RAN	RFK
	LAMTOR1			SOX4	SEC62	SLC44A2	RANBP1	RHEB
	LAS1L			SP1	SELT	SLC6A9	RANBP2	RIPK4
	LCMT1			SP3	SENP2	SLC9A3R1	RANGRF	RMST
	LDLR			SPARCL1	SENP7	SLC9A4	RASGEF1B	RNASE4
	LDLRAP1			SPAST	SEPHS1	SLMO2-ATP5E	RASSF4	RNASEH2C
	LGALS3BP			SPINK1	SEPT2	SMA3	RBM3	RNASEK-C17orf49
	LGALS8			SQLE	SEPT7	SMARCC1	RBM39	RNASET2
	LIMCH1			SRCAP	SEPT7P2	SNURF	RBM4	RNPEP
	LINC00887			SRF	SERF1A	SOD2	RBM4B	RNPS1
	LMAN1			SRM	SERINC3	SPC25	RBMX	ROMO1
	LMBRD1			SRSF2	SESTD1	SPI1	RC3H2	RPF2
	LMNA			SRSF3	SET	SPICE1	RCBTB1	RPL12
	LMTK2			SSH2	SF3B3	SPN	RCL1	RPL13
	LOC100132247			SST	SF3B5	SPNS1	RDX	RPL15
	LOC100190986			ST20	SH3BGRL2	SREK1IP1	REEP5	RPL17
	LOC100271836			ST6GAL1	SHOC2	SRGN	REG1A	RPL19
	LOC100507217			ST6GALNAC5	SHPRH	STAG3L3	REV1	RPL21
	LOC100507577			STARD10	SIN3A	STRA6	REXO2	RPL22
	LOC148696			STAU2	SIRT1	STX17	RGPD6	RPL23A
	LOC284412			STK38	SKIV2L2	STXBP2	RGS7	RPL23AP82
	LOC388152			STMN1	SKP1	TAGAP	RGS9	RPL24
	LOC401320			STRN4	SLAIN2	TBC1D1	RHBDD2	RPL27
	LOC541471			STT3B	SLC19A2	TBC1D13	RHOT2	RPL27A
	LOC653513			STXBP4	SLC25A14	TBC1D24	RIMKLB	RPL30
	LONP1			SULF1	SLC25A3	TCIRG1	RIOK3	RPL32
	LONP2			SUPT20H	SLC25A6	TENM3	RNF103	RPL35
	LONRF2			SVIL	SLC2A1	THEMIS2	RNF11	RPL36
	LPIN2			SYCN	SLC30A1	TINF2	RNF13	RPL37
	LRIG1			SYNGAP1	SLC30A8	TLE4	RNMT	RPL38
	LRP11			TAC3	SLC35E2	TLN1	ROCK1	RPL4
	LRP2BP			TACSTD2	SLC35F5	TMC8	ROCK2	RPL8
	LRP5L			TAOK1	SLC37A3	TMEM127	RPAIN	RPL9
	LRRC37B			TBCB	SLX1B-SULT1A4	TMEM132A	RPL17-C18orf32	RPLP0
	LRRFIP2			TCF12	SMARCA5	TMEM180	RPL26L1	RPLP1
	LYRM5			TCF4	SMC2	TMEM212	RPL3	RPLP2
	M6PR			TCTN1	SMCO4	TMEM41A	RPRD1A	RPS10
	MAB21L3			TES	SMEK1	TMEM45A	RPS23	RPS10-NUDT3
	MACF1			THAP9-AS1	SMG1	TMEM53	RRM2B	RPS12
	MAD2L2			THBS1	SMG7	TMEM55A	RSF1	RPS13
	MADD			THBS3	SMPD4	TNFAIP8L2-SCNM1	RSPRY1	RPS15
	MAEA			TIA1	SNHG15	TP53	RWDD2B	RPS17L
	MAFG			TMEM107	SNHG5	TP53INP2	SAR1B	RPS19
	MAGEF1			TMEM115	SNHG7	TPTEP1	SATB1	RPS19BP1
	MAGI1			TMEM131	SNRPB2	TRAPPC1	SAYSD1	RPS2
	MAN1C1			TMEM184C	SNX25	TRAPPC2	SC5D	RPS25
	MAN2A2			TMEM189	SNX27	TRIB1	SCAMP1	RPS27L
	MAN2B2			TMEM189-UBE2V1	SNX5	TRIOBP	SCAMP3	RPS28
	MAP2K3			TMEM190	SNX7	TRIP11	SCAPER	RPS4X
	MAP3K2			TMEM50A	SOCS4	TRPM5	SCRN1	RPS6
	MAP7D1			TMEM98	SON	TSPAN10	SCYL2	RPS7
	MAPK1IP1L			TMPO	SORBS2	TTLL3	SDR39U1	RPS8
	MAPK8IP3			TMPRSS6	SOS1	TTYH3	SEC11C	RPS9
	MAPK9			TMSB4X	SPOPL	TUBA3FP	SEC61B	RPSA
	MAPKAPK2			TNPO1	SPTY2D1	TUBB	SEC63	RPSAP58
	MAPRE2			TNPO3	SRPRB	TUBB2B	SECISBP2L	RRP36
	MARCH7			TOB2	SRSF6	TUBG1	SELK	RSAD1
	MARK1			TOP1	SSNA1	TUBGCP6	SENP6	S100A6
	MARS			TOP2B	STAG1	TYROBP	SEPW1	SAE1
	MBD1			TOR1AIP2	STARD4	UBE2Q2P1	SERBP1	SAMM50
	MBNL2			TOR2A	STARD7	ULBP3	SERGEF	SAP18
	MBTPS1			TP53I11	STAT2	UNC5A	SERINC1	SCAF8
	MCM3AP			TPM1	STAU1	USP4	SETX	SCARB2
	MCOLN1			TRAPPC5	STK39	VAC14	SFT2D2	SCP2
	MED10			TRIM24	STRIP1	VNN2	SGCB	SDC2
	MED28			TRIM28	STX6	VSTM1	SGCE	SDCBP
	METTL15			TSC22D2	SUMO2	VWA7	SGPL1	SDF2
	METTL16			TSIX	SUV420H1	WAC	SH3GLB1	SDF4
	METTL5			TSPAN14	SYNRG	WASF2	SHC2	SDHA
	MFN2			TUBB1	SYT11	WBP1	SLC20A1	SDHAF2
	MICAL3			TUBB3	TAB2	WDR13	SLC25A36	SDHB
	MICU1			TUBB4A	TAF9B	WDR31	SLC25A38	SDHC
	MICU2			TXNIP	TAGLN3	X05128	SLC25A4	SEC13
	mir-29b-2			TXNL4B	TANK	XXYLT1	SLC30A9	SEC61G
	MIR7-3HG			UBA1	TBC1D19	YIPF3	SLC39A6	SEH1L
	MPHOSPH10			UBE2E1	TBCK	ZAK	SLC39A9	SEPHS2
	MPP2			UBE2S	TBP	ZBTB7A	SLC41A3	SEPT11
	MPP6			UBR2	TBRG1	ZC3H3	SLC4A10	SEPT15
	MRFAP1			UBTD2	TCEB1	ZDHHC18	SLK	SERF2
	MROH1			UBTF	TCEB3	ZFP36L2	SLMO2	SERPINE2
	MRPL46			UBXN7	TCP1	ZKSCAN3	SLTM	SERPINI1
	MRPS15			UCN3	TCTN3	ZMIZ2	SLU7	SETD3
	MRPS18B			UCP2	TDG	ZNF345	SMA	SF3B14
	MRPS5			USP42	TERF1	ZNF384	SMA5	SFXN1
	MRPS7			USP54	TERF2IP	ZNF580	SMAD4	SHFM1
	MRPS9			VASH1	TFCP2	ZNF713	SMARCE1	SIAH1
	MSANTD3			VCAN	TFF3	ZNF814	SMC3	SIVA1
	MSI2			VEZT	THOC2	ZNF829	SMEK2	SLBP
	MT1E			VIL1	TIAL1	ZSWIM1	SMIM11	SLC11A2
	MTIF3			VIM	TIMM10B	ZSWIM8	SMIM20	SLC15A4
	MTMR10			VWA5B2	TIMM8B	ZYX	SMIM6	SLC25A28
	MTMR3			WASF1	TLK2		SMU1	SLC25A33
	MTOR			WDR19	TMEM132B		SNAP25	SLC25A5
	MTUS2			WDR47	TMEM14A		SNHG17	SLC30A5
	MUT			WHSC1L1	TMEM179B		SNHG8	SLC35B1
	MVP			YBX3	TMEM260		SNRPA1	SLC36A4
	MXI1			YWHAE	TMEM87A		SNURF-SNRPN	SLC38A10
	MXRA7			YWHAZ	TMEM97		SNW1	SLC48A1
	MYEF2			ZBTB44	TMX2		SNX13	SLC50A1
	MYO1B			ZCCHC3	TOB1		SOX6	SMAD1
	MYO1D			ZCCHC6	TOMM22		SPATA7	SMARCA2
	MYO3A			ZDHHC12	TOPORS		SPECC1L	SMARCD3
	MYO5A			ZDHHC8P1	TOR1A		SPIN1	SMDT1
	MYO5B			ZEB2	TP53INP1		SPOP	SMIM19
	N4BP2L2-IT2			ZFAS1	TPD52L2		SPTSSA	SMIM7
	NAGLU			ZFP28	TPR		SRI	SMYD2
	NANS			ZFP36L1	TPT1		SRP19	SNHG3
	NAP1L5			ZFX	TRA2A		SRP54	SNHG6
	NAPA			ZFYVE16	TRAPPC13		SRP9	SNHG9
	NAPG			ZKSCAN1	TRIAP1		SRSF1	SNRNP25
	NARS			ZMYM2	TRIM27		SRSF11	SNRNP27
	NAV2			ZMYM4	TRIM32		SSB	SNRNP35
	NBR1			ZNF124	TRIQK		ST18	SNRPC
	NCR3LG1			ZNF141	TROVE2		ST5	SNRPD1
	NDNL2			ZNF184	TSC1		ST8SIA3	SNRPD2
	NDRG1			ZNF264	TSEN34		STAM2	SNRPD3
	NDUFA10			ZNF281	TSPYL4		STK24	SNRPE
	NDUFB8			ZNF506	TTC21B		STK33	SNRPF
	NDUFB9			ZNF548	TTC37		STRAP	SNRPN
	NDUFS2			ZNF570	TTLL7		STX18	SNX3
	NDUFS6			ZNF571	TUBB4B		STX7	SNX6
	NDUFV1			ZNF587	TUG1		STXBP3	SOD1
	NDUFV2			ZNF667-AS1	U2SURP		SUCLA2	SPCS1
	NEAT1			ZNF711	UAP1		SUCO	SPG11
	NEBL			ZNF761	UBA3		SUDS3	SPINT2
	NEIL2			ZNF827	UBE2Z		SUPT16H	SPRYD4
	NELFE			ZNF844	UBE4B		SUPT7L	SPTSSB
	NEU1			ZRANB1	UBFD1		SV2A	SRA1
	NFASC				UBL7		SYNCRIP	SRP14
	NFX1				UBN2		SYT4	SRSF9
	NGDN				UBP1		TARDBP	SS18
	NGS-17				UCKL1		TAX1BP1	SSR2
	NMNAT2				UHRF2		TBC1D15	SSR4
	NMRAL1				UNC119		TBC1D20	STARD3NL
	NOL7				USP48		TBC1D9B	STK19
	NOMO1				USP8		TBL1XR1	STK40
	NOMO2				USP9X		TCEAL1	STOML2
	NPAS2				USPL1		TCEAL2	STX12
	NPIPL3				UTP11L		TCEAL3	STX8
	NPLOC4				UTP6		TCEAL4	STYXL1
	NPM2				UTRN		TCTEX1D2	SUB1
	NPRL2				VDAC1		TDP2	SUCLG1
	NPTN				VDAC2		TEAD1	SUGP2
	NPY				VMP1		TEX261	SUMF2
	NR0B1				VPS13B		TFG	SUMO3
	NR1D2				VPS35		THAP5	SYAP1
	NR3C2				VPS45		THOC1	SYNGR4
	NSMCE1				VPS4B		THYN1	SYNJ2
	NSUN2				VPS8		TIMM13	TADA1
	NSUN5				WDFY3		TIMM17A	TAF9
	NSUN5P1				WDR1		TIPARP	TAPT1
	NT5C				WDR41		TLK1	TARBP1
	NT5C2				WHSC1		TMED2	TBC1D22B
	NTPCR				WNK1		TMEM126A	TBCA
	NUB1				WSB1		TMEM18	TBCC
	NUCB2				XPO7		TMEM183A	TCEB2
	NUDT15				XRCC5		TMEM185A	TECR
	NUDT22				YLPM1		TMEM245	TFDP1
	NUDT9				YPEL2		TMEM246	TFRC
	NUMA1				YPEL3		TMEM259	THAP4
	NUPR1L				YWHAB		TMEM30A	THOC7
	NUS1				YWHAG		TMEM41B	TIAM1
	OCLM				Z49985		TMEM50B	TIMMDC1
	OPTN				ZBTB1		TMF1	TM2D1
	OS9				ZBTB11		TNKS2	TM4SF4
	OSBPL2				ZBTB6		TNPO2	TM7SF3
	OSBPL6				ZC3H12C		TOMM20	TMA7
	OTUD1				ZC3H13		TOMM70A	TMBIM4
	P2RX4				ZCCHC11		TPPP3	TMCO1
	PACSIN2				ZCCHC18		TRA2B	TMED3
	PAFAH1B2				ZDBF2		TRIM2	TMEM101
	PAIP2				ZDHHC6		TRIM37	TMEM106C
	PAK3				ZMAT2		TRIM44	TMEM128
	PAK6				ZMYM3		TSC2	TMEM147
	PALLD				ZMYM5		TSC22D3	TMEM14C
	PAM				ZNF10		TSPAN13	TMEM163
	PAN2				ZNF106		TSPAN2	TMEM176A
	PAPD4				ZNF121		TTC1	TMEM178B
	PAPPA2				ZNF140		TTC17	TMEM205
	PAPSS2				ZNF146		TTC18	TMEM230
	PARL				ZNF195		TTC3	TMEM251
	PARM1				ZNF22		TWF1	TMEM256
	PARP1				ZNF263		TXLNG	TMEM258
	PBOV1				ZNF280D		TXN2	TMEM59
	PBX3				ZNF326		UBE2H	TMEM59L
	PCBP1				ZNF330		UBE2K	TMEM60
	PCBP2				ZNF407		UBE2Q1	TMEM69
	PCK2				ZNF518A		UBE3A	TMEM9
	PCNP				ZNF562		UBE4A	TNFRSF21
	PCSK2				ZNF638		UBL3	TOMM5
	PDAP1				ZNF664		UBR1	TOMM6
	PDCD4				ZNF789		UBR3	TPCN1
	PDE12				ZNRD1		UBXN4	TPI1
	PDE8A				ZSWIM7		UFL1	TPM4
	PDHA1				ZYG11B		UGGT2	TRAPPC2P1
	PDIA6				ZZZ3		UHRF1BP1L	TRAPPC4
	PDXDC2P						UNC45A	TRIB3
	PDXK						UNC80	TRMT112
	PEA15						UPF3A	TRPT1
	PEBP1						URI1	TSG101
	PEF1						UROD	TSPAN31
	PELO						USO1	TSPAN7
	PEMT						USP11	TSTD1
	PER1						USP12	TTC39A
	PER2						USP14	TTR
	PER3						USP16	TUBA1B
	PERP						USP33	TUFM
	PET117						USP34	TXNDC17
	PFDN1						USP40	TXNL4A
	PFDN2						USP47	UBA52
	PFKP						VAPB	UBE2F
	PGK1						VEGFB	UBE2J1
	PGM3						VIMP	UBE2L6
	PGR						VMA21	UBE2M
	PHF1						VPS13A	UBE2V2
	PHF17						VPS29	UBL5
	PHF8						VPS52	UGP2
	PHTF2						WASL	UQCR11
	PHYH						WBP5	UQCRB
	PI4KA						WDFY1	UQCRC1
	PI4KB						WDR48	UQCRC2
	PIGO						WDR6	UQCRFS1
	PINK1						WRB	UQCRH
	PIP4K2C						WRNIP1	UQCRQ
	PIR						XPO1	UROS
	PISD						XRN1	USF2
	PITRM1						XRN2	USMG5
	PJA2						YES1	USP25
	PKD1P1						YIPF6	UXT
	PLA2G16						YME1L1	VAMP8
	PLA2G4C						YPEL5	VDAC3
	PLCE1						YTHDC2	VKORC1
	PLEKHA1						YWHAQ	VKORC1L1
	PLEKHB2						ZBED5	VPS16
	PLEKHF2						ZC3H11A	VPS25
	PLOD2						ZC3H14	VPS26B
	PLXNA2						ZC3H15	VPS41
	PMM2						ZCCHC14	VTA1
	PNLIP						ZCRB1	WBSCR22
	PNMA2						ZDHHC2	WDR33
	PNN						ZFAND1	WDR54
	POGK						ZFHX3	WDR61
	POLDIP2						ZMAT1	WDR83OS
	POLR2F						ZMYM6	WIPI2
	POLR2H						ZMYND11	XPNPEP1
	POP5						ZNF165	XRCC6
	PPAPDC1B						ZNF254	YBEY
	PPCS						ZNF33A	YIF1A
	PPFIA1						ZNF37A	YRDC
	PPIE						ZNF639	YTHDF1
	PPIL4						ZNF692	YTHDF2
	PPIP5K1						ZNF76	ZBED5-AS1
	PPL						ZNF791	ZBTB8OS
	PPM1A						ZXDB	ZCCHC17
	PPM1L							ZDHHC5
	PPME1							ZDHHC9
	PPP1CB							ZFAND2B
	PPP1R1A							ZFAND6
	PPP1R7							ZHX1
	PPP2R5A							ZMYM6NB
	PPP3CC							ZNF236
	PPT1							ZNF337
	PQBP1							ZNF467
	PQLC2							ZNHIT1
	PRDX1							ZNHIT3
	PRDX5							ZRANB2
	PRKAG2							ZSCAN18
	PRKAG2-AS1
	PRKCH
	PRKD2
	PRMT2
	PROSC
	PRPF19
	PRPF31
	PRPF6
	PRPF8
	PRPSAP1
	PRR13
	PRSS3
	PRUNE2
	PSAP
	PSEN2
	PSMB1
	PSMB2
	PSMC1
	PSMC3
	PSMC5
	PSMC6
	PSMD12
	PSMD2
	PSMD4
	PSMD7
	PSME1
	PSME2
	PSMF1
	PTGES3
	PTGR1
	PTGR2
	PTPMT1
	PTPN11
	PTPRN
	PURA
	R3HDM2
	RAB11FIP1
	RAB11FIP5
	RAB12
	RAB17
	RAB21
	RAB24
	RAB39A
	RAB39B
	RAB3GAP2
	RAB7A
	RAD17
	RANGAP1
	RAP1B
	RAP1GAP2
	RAPH1
	RASD1
	RASGRF1
	RB1CC1
	RBL2
	RBM14
	RBM14-RBM4
	RBM23
	RBM27
	RBM28
	RBM42
	RBM6
	RCAN2
	RCAN3
	RCOR3
	RDH11
	REEP4
	RELA
	RER1
	RFC1
	RGL2
	RGN
	RGPD8
	RGS11
	RHOB
	RHOQ
	RIC3
	RIN1
	RIN2
	RIPK1
	RLIM
	RNF113A
	RNF114
	RNF115
	RNF141
	RNF157
	RNF180
	RNF181
	RNF185
	RNF187
	RNF19A
	RNF19B
	RNF213
	RNF220
	RNF6
	RNH1
	RNPC3
	RORA
	RPL11
	RPL36A-HNRNPH2
	RPN2
	RPRD1B
	RPS20
	RPS4Y1
	RRNAD1
	RRP12
	RSPH1
	RTCB
	RTFDC1
	RTN4
	RUFY2
	RUFY3
	SAFB2
	SAMD8
	SAP30BP
	SAR1A
	SARS
	SART3
	SAT2
	SBDS
	SBDSP1
	SCAMP5
	SCD
	SCG2
	SCG3
	SCG5
	SCGB2A1
	SCGN
	SCOC
	SCPEP1
	SDF2L1
	SEC16A
	SEC22C
	SEC23B
	SEC24C
	SEC31A
	SECISBP2
	SEL1L
	SEMA5A
	SEPT3
	SEPT8
	SERF2-C15ORF63
	SERP1
	SERPINA3
	SERPINB6
	SESN1
	SESN2
	SETD7
	SF3B2
	SGMS2
	SGPP2
	SGSM1
	SGSM2
	SH3GL2
	SH3YL1
	SHISA9
	SHMT2
	SIAE
	SIK2
	SIL1
	SLC17A5
	SLC1A4
	SLC23A2
	SLC25A39
	SLC2A13
	SLC35B2
	SLC35D2
	SLC39A14
	SLC39A7
	SLC3A2
	SLC7A1
	SMAP1
	SMC5
	SMCR8
	SMN2
	SMPD1
	SMURF1
	SNAP91
	SND1
	SNF8
	SNRK
	SNRNP200
	SNX1
	SNX14
	SNX19
	SNX29
	SNX29P2
	SNX9
	SORBS3
	SORT1
	SPAG7
	SPATA20
	SPCS2
	SPDYE6
	SPEG
	SPG21
	SPG7
	SPIRE1
	SPR
	SPRYD3
	SPTB
	SPTBN1
	SPTBN4
	SQSTM1
	SRD5A1
	SRGAP2
	SRGAP2B
	SRP72
	SRPR
	SRSF4
	SRSF5
	SSFA2
	SSR1
	SSR3
	SSSCA1
	SSU72
	ST13
	ST14
	ST3GAL5
	STAG2
	STAT1
	STAT3
	STRADA
	STUB1
	STX16
	STX3
	STXBP1
	STXBP5
	STXBP6
	SUCLG2
	SUGT1
	SULT4A1
	SUMO1
	SUMO1P3
	SUN1
	SUOX
	SUPT5H
	SURF1
	SURF2
	SURF4
	SUSD1
	SUSD4
	SVIP
	SYBU
	SYF2
	SYN1
	SYNE1
	TACC1
	TACO1
	TAF7
	TALDO1
	TANC2
	TANGO2
	TATDN1
	TBC1D8
	TBC1D9
	TBCE
	TBL1X
	TCEA1
	TCEAL8
	TCF25
	TFIP11
	TGOLN2
	THAP6
	THRA
	THRAP3
	THRB
	TIMM10
	TIMM22
	TIMP1
	TM2D3
	TM9SF3
	TMBIM1
	TMBIM6
	TMC4
	TMCO3
	TMED10
	TMED5
	TMED7
	TMED9
	TMEM106B
	TMEM129
	TMEM141
	TMEM14B
	TMEM167B
	TMEM176B
	TMEM200A
	TMEM208
	TMEM209
	TMEM219
	TMEM234
	TMEM248
	TMEM30B
	TMEM33
	TMEM42
	TMEM43
	TMEM54
	TMEM55B
	TMEM57
	TMEM61
	TMEM65
	TMEM66
	TMEM9B
	TMOD1
	TMUB2
	TMX4
	TNFRSF12A
	TNFRSF14
	TNFRSF1A
	TNRC6A
	TNS3
	TOLLIP
	TOM1
	TOMM34
	TOX4
	TP53BP1
	TP53BP2
	TP53TG1
	TPD52
	TPM2
	TPM3
	TPP1
	TPP2
	TPRG1L
	TPRKB
	TRAFD1
	TRAM1
	TRAPPC12
	TRAPPC2L
	TRAPPC9
	TRIM13
	TRIM4
	TSC22D1
	TSN
	TSNAX
	TSPYL1
	TSPYL2
	TSR2
	TSR3
	TSSK3
	TSTD2
	TTTY15
	TUBA1A
	TUBG2
	TUBGCP4
	TULP4
	TVP23B
	TXLNA
	TXN
	TXNL1
	U2AF1
	U2AF1L4
	U50535
	UAP1L1
	UBA2
	UBC
	UBE2B
	UBE2G2
	UBQLN1
	UBQLN2
	UBXN6
	UCHL5
	UFD1L
	UFM1
	UGDH
	UHMK1
	UNC50
	UNC5CL
	UNC79
	UPP1
	URGCP
	USP2
	USP22
	USP30
	USP36
	USP38
	USP7
	UTP3
	UTY
	VAMP3
	VAPA
	VAV2
	VCP
	VOPP1
	VPRBP
	VPS11
	VPS13C
	VPS13D
	VPS33A
	VPS37A
	VPS37C
	VPS39
	VPS4A
	VRK2
	VWA5A
	WASH1
	WASH3P
	WBP11
	WDFY2
	WDR43
	WDR45B
	WDR5
	WDR59
	WDR7
	WDR85
	WFS1
	WNT4
	WSB2
	XBP1
	XPC
	XPR1
	YARS
	YBX1
	YOD1
	YTHDC1
	YWHAH
	ZBTB21
	ZBTB24
	ZBTB25
	ZBTB38
	ZBTB4
	ZBTB43
	ZC3H6
	ZC3H7A
	ZDHHC4
	ZFAND2A
	ZFAND3
	ZFAND5
	ZFC3H1
	ZFP91
	ZFPL1
	ZFYVE27
	ZMYND8
	ZNF24
	ZNF275
	ZNF292
	ZNF32
	ZNF395
	ZNF460
	ZNF507
	ZNF516
	ZNF622
	ZNF652
	ZNF655
	ZNF706
	ZNF83
	ZNF91
	ZNFX1
	ZRSR2
